# Supplementary material for: Differentially expressed gene profiles and associated ceRNA network in ATG7-Deficient lens epithelial cells under oxidative stress
Source: Front Genet. 2022 Dec 7;13:1088943. doi: 10.3389/fgene.2022.1088943 (PMC9768497; doi:10.3389/fgene.2022.1088943)
Supplement: Supplementary file 1 [file Table1.xlsx]

## Sheet: S1
Supplemental Table S1. List of differentially expressed genes in Atg7-KO and WT groups.
Up-regulated				Down-regulated
KO 0h vs WT 0h	KO 12h vs WT 12h	WT 12h vs WT 0h	KO 12h vs KO 0h	KO 0h vs WT 0h	KO 12h vs WT 12h	WT 12h vs WT 0h	KO 12h vs KO 0h
1189	1431	2384	2129	965	1912	2219	2291
AKR1C3	AKR1C3	HSPA6	GRHL3	SLC7A5	BEX1	HLA-DRA	ARL14EPL
CSF3	CPNE8	AREG	AREG	DPYSL4	SLC7A5	DACH1	TMEM240
IL18R1	LUM	CSF3	GDF15	DAPK1	FBLN1	CYBB	PIF1
OASL	KYNU	GDF15	GREB1	BEX1	HSPA6	C1QTNF3	DIO2
LUM	PARP8	GREB1	PDE4C	NXF3	OVGP1	SIM1	KLRC2
PARP8	EXOC3L2	LHX3	NECTIN4	NUP210	GRB7	PDE7B	EFHC2
F2RL1	F2RL1	ANGPTL4	KANK3	FBLN1	FBLN2	SORBS2	CDK15
KYNU	SOX5	SH2D2A	BTG2	FBLN2	H2AFY2	ASPM	CCNB3
PTGS1	IL24	BTG2	GPR87	H2AFY2	NUP210	DIO2	PLK1
TRIB2	TLR4	PLEKHA6	CDH10	FOLR3	DPYSL4	MUSK	KLF17
CPNE8	FAM133A	RRAD	CAVIN2	FAM189A1	CA9	SAMD12	SYTL5
DHRS2	C3	FBXW10	POU3F2	MYCT1	SOWAHD	FIGN	NUTM2F
MYLK4	DHRS2	SLCO5A1	DRAXIN	TINCR	CERS4	FAM227A	SMIM11A
SH2D2A	IFI44L	NECTIN4	NSG1	CDH13	NXF3	SPTLC3	PSRC1
CA8	XK	SERPINB10	CES3	FRY	FAM189A1	CALCRL	CASC1
XKR4	CA8	GRIN2C	CEACAM1	NUPR1	BAAT	CCDC190	MXD3
SCG5	PRSS3	GPR87	ANK1	C3orf70	LRIT3	TRIM17	CCDC146
MID1IP1	PTK2B	DRAXIN	ACER2	PPFIA4	ALDOB	CENPE	FAM78B
C3	TRIB2	KANK3	IQANK1	IGFBP3	PSG1	CHRM2	CCNB1
PRSS3	CSF2RA	FOS	RIMS4	PSG5	FOS	TCP11L2	GPR1
RARRES2	NRCAM	POU3F2	WDR63	CCDC200	B4GALNT2	CPAMD8	OR2T8
TENM1	SCG5	SLC52A1	MCC	DUSP2	POSTN	KIF18A	MEOX1
TMEM119	EHF	GNA15	CDKN1A	DLX6	CDH11	DNAH6	OR2I1P
BEND4	CXCL5	CDKN1A	SLC30A3	CDH11	CDH13	DEFB131B	DACH1
CSF2RA	DPP4	PTGS1	LHX3	PSG4	SYNE3	CPZ	GRIN2A
SAA2	SPTLC3	AC099489.1	LSP1	TMEM106A	TMEM240	KCTD16	IL34
AOAH	CADM3	GRHL3	SULF2	GLB1L3	SOX30	CENPF	RAB26
XK	EHD3	CDKN1C	DAPK1	SLC8A2	PYGM	ZNF99	CPED1
EXOC3L2	BEND4	IL6	INSYN2	LYZ	TJP3	SPATA17	SLC44A5
CXCL5	ANXA8L1	DUSP5	SPATA18	OVCH2	GRIN2C	ZNF608	TMEM71
FAM133A	ACOX2	PLCH2	ANGPTL4	TRPC6	NPPB	SPN	HMMR
SLC44A5	MAGEA10	PIWIL2	MDM2	POSTN	TINCR	SOX5	KIF20A
DPP4	KCTD12	CFAP97D1	ATF3	PCDHGA9	LINC00672	NLGN1	DLGAP5
CXCL6	FLT1	ABCA4	GPD1	FBLN5	CREB5	RUNX1T1	SOWAHD
CYP11A1	SRPX	MCC	TRIM22	ECM2	LRRC4B	LUZP2	AURKA
SRPX	PCDHGA4	LRRC15	C2orf72	LGI2	JSRP1	AKAP6	WNT16
NDST3	PLAG1	TSGA10IP	LIN7A	CERS4	CELF5	PIF1	BUB1
DTX4	CD163L1	TNFSF14	SLC52A1	IFT172	OR2T8	TEX22	TCP11L2
GNGT2	XKR4	FOSB	FAM83H	PSG1	MFNG	UTRN	CDC20
GGT5	INAVA	RASD1	LRRTM2	ASNS	GPR1	CCDC180	ATOH8
CYTL1	PRKCQ	IL16	SHC4	TTN	STXBP2	FBXO43	NEK2
PTGES	CTSS	LTA	LYNX1	SLC27A2	RAB11FIP4	DNAJC28	RTL3
PIWIL2	CXCL6	MAFA	CDC42BPG	CA9	SLC9C1	PPM1H	DEPDC1
INAVA	GREM1	RCSD1	ZMAT3	CPA3	CDK15	CRISPLD1	ST6GALNAC5
EHF	SERPINB4	DNAH12	DEPP1	PSG9	RTN4RL2	LYZ	CCL2
ANXA8L1	TPK1	EFNB1	RTL9	PAMR1	C4BPB	HOXA2	CCL7
KCTD12	MAGED4B	SHC4	FDXR	NSG1	CNTD2	CIT	PLGLB1
G0S2	EVC2	UGT2B7	CLCA2	KIF26B	DNAH2	ARL14EPL	SPTLC3
ATP10B	LANCL3	NR4A3	SMOC1	STXBP2	PAMR1	FRY	DPYD
RBM47	LAPTM5	EGR2	PDE3A	FAM71D	CD38	CLDN18	FMO3
LIPG	TNIP3	ATF3	CYFIP2	GRHL3	LGI2	NBEA	ROS1
KLRC2	ANPEP	CKM	HUNK	ZNF502	MYO15B	LRBA	NEXN
AVPR2	NDST3	MYOZ3	CSF3	RTN1	CPA3	CDH18	CLDN18
MAGEA10	LAMP3	ACER2	ZIC2	DEFB131B	TMEM236	BNC2	SORBS2
COL15A1	JPH4	INSYN2	INHBB	CDH6	SLC27A5	CFAP44	GBP2
SPTLC3	GCOM1	CES3	ULBP1	MEGF6	SLCO5A1	PPP1R9A	TLE6
SERPINF2	TIE1	IL1B	PSTPIP2	CDH10	PPFIA4	ARHGEF33	ASPM
KRT81	ZNF99	AVPR2	C3orf80	CHRD	GPR83	ATOH8	C1QTNF3
CXCL8	PSD4	RAB33A	ABCA4	CHRM2	TEKT2	KANTR	TSPAN18
OCIAD2	SLITRK4	TNFSF4	OR10A6	SLC2A10	CD72	RTKN2	AK9
ALOX5AP	POU2F2	BCL2A1	INPP5D	ABI3BP	GPR156	CCDC65	GAS2L3
MAGED4B	TMSB4Y	DNAH2	HSPA6	GFRA1	ERICH5	OR2I1P	CCNB2
TNIP3	TENM1	CSF2	SERPINB10	CHRM3	CD200R1	FAM78B	COL8A1
PECAM1	PCDH1	MAB21L1	TNFRSF14	KRT33B	DIO2	TENM2	ST6GALNAC3
NRCAM	CSF3	INHBA	SFN	EPHA5	SMIM11A	PARD3B	P2RY6
ZC3H12D	ZBTB8B	HSPA1A	NUPR1	CHD5	DCAF4L1	DISC1	SCN9A
TLR4	STC1	IQANK1	RTN4RL1	ERBB4	TAF7L	SNPH	LMTK3
CADM3	ZNF662	PYGM	GABBR2	ADM2	FOLR3	RBMS3	KIF18A
SBSN	LYPD8	GPR37	MAFA	TTYH2	DUSP2	LRRIQ1	GRK5
TNFSF15	FAM166B	LIF	SH2D2A	HACD4	SPI1	CCDC191	TSPOAP1
CSDC2	GNGT2	CDH10	CA12	EPHB3	MPIG6B	COL12A1	SAMD12
TMEM86A	RGS17	NUP210L	EFNB1	CEACAM1	EGR3	SLITRK5	CDCA3
MOV10L1	ZNF114	PLAC8L1	GNA15	KIF26A	PLEKHD1	KIF14	ACCS
HCN4	SPN	PTAFR	DNAH12	RNF150	NHLH1	BTBD8	CKS2
SERPINB2	CXorf57	SERPINF2	INKA2	STXBP5L	LY6G6C	DCDC2	FANK1
IL1B	SH2D2A	IGSF9	LIPC	FAM95C	FOSB	EPHA5	CCDC170
INHBA	ANKEF1	PNLDC1	FAS	PDE3A	PCDHGA9	SMIM5	KRT80
GREM1	PTPRU	GADD45A	AL135905.2	OR10A3	C9orf24	AC112128.1	SLC9A9
GCOM1	PDE4C	CXCL8	NTN1	NPTX1	TNFSF4	CDRT15	CTIF
CARD16	DTX4	EGR3	TNFRSF10A	CCL28	SGCG	GAS2L3	PTGES3L
STRA6	PAPPA	IL1A	HCAR2	ZNF878	RASD1	SYTL5	PARD3B
TRPM2	FAM198B	TMEM119	LRRC15	PSCA	TBC1D30	DYNC2H1	TSNAXIP1
IL6	SERPINB7	GPD1	EPN3	CDK18	ASPRV1	PIEZO2	ACP6
LAMP3	PARM1	SOCS1	ISLR2	OXTR	DBH	GLIS1	APCDD1L
FLT1	TNFSF15	KLF4	GKN2	LHX9	RAB33A	CDK15	CENPA
SNAP25	TIMP3	MUC12	SLC7A8	NGEF	IGFBP3	RARB	PPOX
GPR68	GPAT3	CAVIN2	HAS2	PCDHB11	UPK1A	SGO2	OR2W3
CXorf57	ANGPT2	PMAIP1	NGFR	TBC1D30	IFT172	KIAA1958	ACBD7
GPAT3	CD74	CLDN6	SORL1	GNG7	C9orf152	TNFAIP8L1	RHOBTB3
UGT2B7	ITGA11	ACTC1	EPHB3	LMF1	KCNC3	STON1	ANXA3
PCDH1	SAMSN1	N4BP2L1	RRAD	SALL4	NUTM2F	NRIP2	IGFN1
PTHLH	IL1B	HBEGF	LAPTM5	ADSSL1	KLF17	BUB1	GPRIN3
CXCL1	RARRES2	JAG1	ADAMTS1	BGN	EGR1	ALPK1	IFIT1
SLC1A3	PTPN22	RSPO3	GALNT18	GALNTL6	SAXO1	BUB1B	CACNG4
ABI3	FRMPD4	CCL20	PTPN22	FAM83H	NUP210L	VPS13B	TMEM119
GPR143	ISLR2	RASSF10	JAG1	RIPPLY3	LILRA6	BORA	CCDC180
NRXN1	CYP2J2	MYLK4	IL13RA2	PSG6	AEBP1	AK9	C19orf71
CSF2	SLC26A7	PHLDA3	KITLG	CCDC85A	GPR35	PDE1C	CCDC190
KRT17	GPR143	ADAMTS13	KDM7A	RAB11FIP4	MRC1	ZNF681	TENM2
CRTAC1	TMEM132D	IL13RA2	TMC7	SULF1	GNG7	TRIM59	COL11A1
SOX7	GPR39	SOX30	LZTS1	CCDC88C	ID2	MYO1F	COL24A1
SERPINB10	KDR	CDC42BPG	GJD3	ANKRD24	SLC27A2	AC068831.7	ACSF2
EHD3	ZNF729	PKD1L1	INSRR	INSYN1	MMRN2	NOVA2	MYO7B
ANXA8	SHROOM2	PAQR9	GAL3ST4	AATK	MATN4	FZD2	TMEM52B
PTK2B	MAML3	PTP4A1	PROKR1	LRRC3	PNLDC1	RALGPS2	PTGES
HSPA6	SETBP1	ITGAM	KCNJ2	MAL2	KCNN1	CYB5RL	BIRC5
IP6K3	B3GNT7	XDH	IL1B	RHOD	NUTM2B	RALGAPA2	KIF2C
WNT16	FAM83A	GALR2	RASSF10	ADAM23	TSGA10IP	SALL2	KIF14
HR	MERTK	IL36G	INSYN1	ZNF564	VWA5B2	FABP3	TTLL9
GAP43	PTGES	ANK1	EPPK1	MAPT	DLX6	LRRC7	CLCNKB
CD163L1	TFEC	ZFP36L2	PLEKHG1	NFASC	FAM13C	HSPG2	ALPK1
FAM83A	OCIAD2	PHLDA2	SLC26A7	NDST2	KCNK12	FAM95C	CATSPERE
NSUN7	RGPD5	BBC3	HOXC5	CAMSAP3	SSUH2	MSH5	AC091057.6
IGFN1	S100A5	PLEKHD1	DKK2	AK4	TRIM74	PRR16	SPC24
CXCL2	TMEM156	S100A14	THSD1	C2orf15	IQCN	ETV1	ADAM21
SSC4D	NRK	MDM2	DUSP9	DNAH11	DLX3	TP53TG3D	CCNG2
TIMP3	F2R	TAF7L	STOM	MELTF	CAND2	STXBP4	NAALADL2
DUSP4	SERPIND1	PGF	PLCXD2	C2orf72	AOC3	SDK1	GNB1L
PLEKHA6	NAP1L2	TNFAIP3	2022-09-04	MGAT3	FRY	DOP1B	NOSTRIN
IL18	IGSF3	CXCL3	KLF1	ANKRD18A	RTN1	NAALADL2	RHPN1
TMEM52B	SAA2	GDNF	NDRG1	RGS4	AC099489.1	TTK	HES7
TIE1	ABI3	C3orf80	FAM166B	NPPB	PLAC8L1	METTL7A	NNMT
TMEM92	SIPA1L2	WDR63	WNT9A	ULBP1	NEURL3	DEPDC1	STEAP3
SERPINB7	LIMS4	CHRNA3	PLEKHA6	CPZ	CCDC116	CYP1B1	FBXO43
VNN1	FHOD3	CYP11A1	AEN	JAM3	SLC2A10	DUSP19	ERVW-1
GIP	LPL	INSRR	PHLDA3	ALDH1L2	TYRP1	SCN9A	RASSF9
CLDN16	MMP9	SAT1	COL9A3	RORA	KLF4	CARF	CAP2
TMEM132D	ALDH3A1	GPR83	HSPA4L	PCDHGB6	LGALS2	RNF150	TTK
ISG20	AKAP6	BTN1A1	SESN1	CBS	GFRA1	KIF20B	CCDC102B
JPH4	WNT5A	RGCC	KIAA1211L	HSPA2	TMEM88	RBMS2	MYEF2
TMEM169	PLA2G4A	NGFR	XDH	ZNF521	EFCAB12	CPS1	SATB1
EVC2	CSGALNACT1	SLC16A11	COBLL1	MGARP	B3GNT4	NBEAL1	MAATS1
ZNF729	LPAR3	SHISA7	GCNT3	CAMK2B	ST6GALNAC3	FUT2	PDE7B
MSC	CPE	EPN3	ABCG4	WASF3	ECM2	MKI67	CCDC154
SH3TC2	ZNF774	ARHGAP30	DUSP5	SEMA3E	IL21R	PAQR5	UBE2C
CHI3L2	C4orf19	GABBR2	C3orf67	C4BPB	GADD45B	NEXN	FGF1
ANPEP	CRISPLD1	ADCY10	ZCCHC12	FMN2	KLRD1	FILIP1L	ARL6IP1
CD74	NOTCH4	ID2	FOLR3	SLITRK3	EFHC2	FMN2	KPNA2
MGAT4C	STEAP2	CXCL2	IL1RL1	ADGRL3	N4BP2L1	SLC9A9	RHOU
RAB39B	PDE4D	HECW2	MARVELD2	SPRY1	ACTG2	C6orf201	FGF17
NETO1	SLC8A1	EDA2R	SLC8A2	LMOD1	INHBE	CDH6	CCDC189
ENPP2	PRICKLE2	TNFRSF10A	B3GAT2	BMP8B	HPX	TOP2A	AZIN2
CSF1R	LPXN	ISLR2	TP53INP1	VLDLR	SCART1	ZNF610	TMEM184A
IL24	UCN2	NSG1	LTA	LY6E	NOXA1	KIF20A	SGO2
PSD4	TMEM86A	TEX14	DPYSL4	SERPING1	ITGAL	SLITRK3	FBXO15
OSCAR	NHSL2	JSRP1	LIMS4	CASZ1	NEK5	ATXN1	CFI
MYZAP	TEX15	SYBU	MYO10	AKAP2	ITGA2B	ANKRD23	LDLR
APOC1	CREG1	SIK1B	KLLN	RAMP2	TTYH1	COL11A1	SEC31B
ELF3	ACTBL2	CETP	VCAN	GPNMB	MYH15	MAATS1	E2F5
PWP2	HR	RRH	FAM183A	COLGALT2	ADCY10	GVQW3	GMPR
CNIH3	TGM2	PDE4C	KLRG2	ACER2	SERPINA1	ADAM28	OPN3
MMP7	RASSF10	CYGB	CHRNA3	DLX3	GLB1L3	CENPI	ARMH1
MAGEH1	RBM47	RNF19B	GAREM1	GBGT1	GRIN2A	GBP2	CEP112
PMEPA1	ADGRF5	SAA2	TPBGL	TNFSF4	SLC52A1	IFI44L	GIP
MMP9	DOCK4	KRT86	PCDHGC5	TCAF2	PIF1	EXPH5	DNAH6
KRT86	RHOF	SOX7	TMEM40	KRTAP2-3	LMF1	ZMYM3	PRR11
ZNF704	KRT81	AIFM3	ABCA1	TRPC4	TECTA	MAVS	RANGRF
HTRA3	TLR6	SPI1	UGT2B7	ADAM11	BAIAP3	ZFYVE28	ST3GAL5
SAMSN1	EIF3C	PDE6G	FRZB	MYCL	SGCA	GOLGA8N	ERBB3
COL24A1	IL18R1	CEACAM1	FCGBP	LYNX1	SPRY1	ZNF774	SLCO2A1
B3GNT8	MDGA2	PRELP	PTAFR	EMILIN3	CLDN6	FAT4	NOXA1
POU2F2	CD302	PTPN6	FAM71D	PLAC8	PKDREJ	ANLN	CYP1B1
ARL14	GRIN2D	TBR1	RRM2B	PCDHGB2	WDR86	ALDH6A1	TSPAN15
TMEM156	IFI44	DKK2	ARHGAP30	GOLGA8K	KIAA1257	MEGF8	DISC1
RASGRF1	MPZL3	FCGBP	BBC3	SMAD9	TSLP	DLGAP5	STON1
KRT16	SHC4	RHOB	EDA2R	LUZP2	MEGF6	CBX7	CPT1C
RASSF10	DTD2	NIPAL4	RNF125	CAND2	CPT1C	ATP7B	KCTD16
GGT1	B3GNT8	DUSP1	AC007906.2	PSAT1	PIWIL2	ATM	ST8SIA6
AKR1B1	TRERF1	F2RL2	TP53I3	MMP24	BTK	DNAH5	CDON
COL16A1	PCDHB8	PTHLH	CASZ1	INPP5D	RND1	NOVA1	NUF2
PAX8	COL4A5	LRRTM2	MAB21L1	GIPC3	CLYBL	AC091057.6	DCDC2
KCNJ15	ISM1	PHLDA1	IL6R	MYH14	TNFRSF13C	CTIF	NAT14
CXCL3	ADGRF4	ULBP1	MAST4	C9orf84	DLL1	TMEM170B	NDC80
FBXO2	VANGL2	AEBP1	ANKRD33B	RGS7	MYOZ3	MAML3	NTNG1
S100A4	KCNH1	PTGS2	NPTX1	ELFN1	OVCH2	KIF4A	UCP3
NOTCH4	DUSP4	TENT5C	PTCHD4	FGF12	GALNTL6	PLK1	SNORC
AC093323.1	CYP11A1	SPTBN5	HECW2	SULT1B1	HOXB9	FSIP2	TMEM160
VDR	IL22RA1	CA12	EGFLAM	CDH18	ACTC1	CRMP1	STAC2
GNG2	COL25A1	REM2	FLRT3	CD177	SYT15	LMTK3	OSCAR
ZNF488	SFN	GRB7	SESN2	ZNF354C	DRD4	DOCK3	PDGFRB
ISLR2	ADGRL3	IL12A	TNFSF4	AIF1L	PSG4	KCTD19	KNSTRN
MYEOV	MN1	FDXR	HPCAL4	TRIM17	ADAMTS13	ERBB3	TTLL1
KRT79	IL12RB1	LIPG	ABCA12	CHAC1	PTPRH	FRK	UBA7
PLAU	C1orf115	SSUH2	TRIM9	INHBB	CHD5	C11orf88	PIP5KL1
CLDN3	P2RY2	NKX2-5	TAS2R31	KRT19	ALPK3	PRR11	NSUN7
CTSS	ETV1	ITGA10	PTP4A1	2022-03-01	CD160	PAQR8	TNFAIP8L1
CYP26B1	CYP2R1	ACHE	CCR7	CEMIP	SLC26A10	ADAMTSL3	XKR4
NDRG2	CYTL1	GGT1	IL12A	PLEKHG1	ADAM11	PTGFR	FAM72C
GPR37L1	LSP1	EFCAB12	PCDH12	PCDH10	DDN	SPC24	ATP10B
SRSF8	SLC4A4	UPK1A	RSPO3	ANKRD36C	LAMA2	TLL1	NALCN
C4orf19	MMP16	LKAAEAR1	SAT1	EHHADH	S100A14	RALGPS1	NTHL1
GPRIN3	FRRS1L	AOC3	IL6	SLC16A6	PLPPR3	IQGAP3	OASL
IFI44L	EDNRA	FRZB	MORC4	RTN4RL2	ASB5	INCENP	RTKN2
IL1A	RBP4	SLC7A8	PLEKHF1	SAXO1	F2	CCBE1	GNAO1
TMSB4Y	IL31RA	CEND1	TEX14	RASGRP1	STKLD1	P2RY6	LTB
LAMC2	MAGEH1	NEUROG2	ARHGAP25	GPR1	ABI3BP	KIAA1328	HEXDC
MPZL3	THBS1	TMEM40	F2RL2	DIO2	UCP3	TRERF1	AURKB
TLR2	KIAA1755	SLC26A7	RAB44	TLL1	TTYH2	NCKAP5	SNPH
SH3BP1	CYP2S1	HAS2	PITX1	ANK2	RHOD	PRRT2	WDR78
TCEA3	BMF	SLC45A2	EXOC3L2	GPR160	CLEC18B	FAM217A	GRIK1
PRDM1	ARSI	ERN1	PLAT	MSLN	SPOCK2	CCNB1	ANLN
LOXL4	KCNJ15	CYFIP2	CSF2	FAM149A	LILRB3	PMFBP1	NME7
ITGA11	ARHGEF35	LRIT3	PLXNB3	CACNA1A	TMEM106A	NAV1	ACTR3C
NPAS3	TMC7	OVGP1	IL36G	PCDHGB7	PCDH18	SAMD15	CCDC153
MAP2	CCDC69	SPRY4	IL33	NXN	WDR38	ARHGAP11A	APOLD1
ABCC3	PTGFRN	ALB	GPCPD1	C2orf16	C2	PSRC1	KIF23
SP140	OAS2	INKA2	NECTIN1	AK8	AATK	ARL17B	FAM227A
PLPP3	NR3C2	NEURL3	TSPAN1	OR2A42	DCDC2B	DBF4B	SP140
STC1	INHBA	MYOM3	SYT10	HCLS1	LENG9	KBTBD3	OLFML2B
TGM2	LAMC2	GPR35	ASTN2	RUNX1T1	SLC26A4	EFHC2	CENPE
BTC	NTRK1	SESN1	S1PR4	FRRS1	JPH3	PLD1	TMEM269
PDE4D	KRT17	FAM83E	PRKCQ	TNFRSF13C	RHOU	CCNG2	CDCA2
PTX3	INA	CAMK1G	TNFRSF10B	CDK15	GCNA	DST	D2HGDH
IL11	TMEM92	MYH15	TNFRSF10D	TUB	LMOD1	GBP5	TROAP
GOLGA7B	OASL	CCR7	NIPAL4	APLN	ST3GAL1	CACNA1A	ADRA1B
FMO3	PROKR1	SCO2	PSCA	ST3GAL1	ARL14EPL	MAPK10	SPATA17
NHSL2	OLFML2A	LY6G6C	C2orf88	ERBB3	COL11A2	A1BG	CA8
KBTBD11	CALB2	MID1IP1	B3GNT7	SBK1	MSH4	NDUFA7	STAC3
MDH1B	GIN1	SOWAHB	PPM1D	MAGEC1	HSPA1A	FRMPD4	POLN
PCDHGA4	STEAP1	CTXND1	NOTCH1	HLA-DRA	CFP	LRP1	RP1
COL4A6	FEZ1	LIN7A	SUMO4	FGF5	SNORC	CCDC146	IQGAP3
ISM1	HSPA4L	KITLG	CLDN6	B3GALNT1	DNAJA4	SERF1B	IL18R1
ADGRF4	GNG2	TAGLN3	HTRA4	NRXN3	TNK1	YPEL1	FRK
BCL2A1	CXCL12	ADPRHL1	ITGA2	C4orf47	HGD	TRAPPC9	KIF4A
DUSP15	COL7A1	PCDHGC5	FST	MATK	SH2D3C	DPYD	IQCK
MEOX1	RINL	PLAT	INHBA	CASKIN1	MMP25	ANKRD36C	MPP4
LANCL3	AREG	AL391650.1	CD8A	CCDC190	MAPT	AURKA	TOP2A
C1QTNF1	PTPRN	DUSP4	NKX2-5	TMEM246	PLCH2	PLA2R1	SLC18B1
HHIPL2	SH3PXD2A	POU4F2	PDGFA	GPLD1	NLGN3	SORT1	DHRS12
UCN2	SRSF8	SLC30A3	KRT33B	SYNE1	ERVW-1	SEMA3E	IL18
C6orf58	PRRX1	MAST4	CKM	MYH3	GNG10	CEP44	HIST1H2BO
SHROOM2	LINGO2	GEM	GADD45A	HK2	C5AR1	IFT80	AOAH
OAS2	NT5C1B	NLRP3	NLRP3	FABP3	POU5F1	C6orf163	CDCA8
GXYLT2	CALHM5	SPATA18	GCNT4	ADCY5	FAM71F1	COL8A1	LIMS2
WNT5A	SAMD3	COL9A3	APLN	RTN4R	LY6E	ZC3H6	SCRN2
CRYBG2	IRS1	S1PR4	CDH3	ZNF551	ZNF418	UACA	NPHP1
ZC3H12A	NDRG1	ADAMTS1	CBLN2	ARRDC4	LRRC3	MRTFB	C6orf58
MYH15	ITGA1	HCN4	ZDHHC11	SLC45A4	CCDC38	BCAS3	GSTA4
PLB1	LIN7A	CD38	TMCC3	PRTFDC1	LGALS4	HMMR	PAQR6
RUBCNL	PTGS1	CSF1	DLL4	KAZN	ATP6V1FNB	DGLUCY	IQCD
SHC4	CXCR6	TIGAR	PHLDA1	DCDC2	HCLS1	GYG2	G2E3
PTGER2	PCDHGC5	DDIT4	PGF	ATP8B1	ZNF415	SYNE1	ENDOG
KIF21B	PTPRG	CRB2	RNF19B	CLCA2	PLK1	ZFP14	FAM20C
C1orf54	GPR4	PLB1	ACHE	PRR16	PSG5	RELN	ARMC9
BEND6	STK32B	DUSP6	PEAR1	ZNF512	C3orf70	PURG	BEX1
CTHRC1	TIAF1	GPR37L1	TSGA10IP	KIRREL3	TTN	GDPD1	CRYL1
LYPD8	GPR68	SLC9C1	CASKIN1	FAM78A	TTLL9	ADGRL3	EFNA1
NOV	BICC1	ZACN	RINL	CCDC80	ZNF502	GFRA1	VNN1
NRK	ATL1	TRIB1	GDNF	LRFN1	TPH1	BMF	CDC25C
ANGPTL4	UGT2B7	HSPA1B	PDE6G	U2AF1L5	OXTR	KIAA1109	CEP70
GRIK5	OTUB2	FST	FAM189A2	NDN	TBC1D10C	KNL1	NEGR1
IL4I1	MID1IP1	DCAF4L1	NATD1	SVEP1	B3GALNT1	KIF15	ADAM28
P2RY6	DPYSL5	FAM71F1	CPNE5	FAM124A	MELTF	PLAG1	ZCWPW2
AC106886.5	MSI1	LRRC43	TIGAR	TRIM59	FHAD1	ZSCAN31	RNFT2
ASB9	HTRA3	KIAA1211L	OR10A3	SLC28A3	GLP2R	GPC6	CAVIN3
CXCL12	PRDM5	BAAT	POLH	VSIG10L	FBLN5	HYLS1	CLDN3
GPR39	CTHRC1	FAM43A	ULBP2	ABLIM1	EFCAB5	VPS13A	EVI2B
SOX5	DDX60L	SCRT1	SUGCT	AL031281.2	ABCC2	COLEC12	RTN4RL2
CCDC69	CHSY3	P2RX6	KCNG3	ADAMTSL1	ALB	GNAO1	BCKDHB
RAPGEF3	NIN	CRTAC1	EGR2	NPM2	SELPLG	RNF213	HLA-DMB
SEMA7A	HEATR5A	GOLGA7B	C11orf91	CRIM1	ZFP36	GTSE1	CRYZ
TCIM	KIF16B	ENKUR	NRCAM	RNF122	PEX5L	PUS7L	PPM1H
APOL3	NOX4	PCDH1	DUSP1	LRRC7	CDKN1C	TBC1D32	DENND2A
ABLIM3	SYTL1	DEPP1	PTPN6	OXCT2	LDLR	IL31RA	DYSF
SH3PXD2A	ZNF630	PLCXD2	JAG2	ZSWIM4	SULT1B1	NIPSNAP3B	PIK3IP1
LPXN	ABCA12	RTL9	HBEGF	RADIL	ABAT	SLC35E2A	CENPF
HMGA2	GJD3	MYO15B	MBOAT1	DOCK6	SAMD11	KIF2C	TRAPPC9
CREG1	SEMA6A	VWA5B2	DSC3	MAP3K15	NR4A3	RFX3	CCBE1
CCL7	RFX3	SLC30A1	ZNF239	PLK2	CD177	GBP4	SLC1A1
ITGAM	TCEA3	ITPRIP	EPHA4	KCNMB3	HOPX	SEC31B	IDH1
GATA3	ADGRG2	KLLN	PPP2R2C	DMTN	RGS2	OCLN	TACC3
LRFN5	COLEC12	NDRG1	PCDH1	ADAMTS1	KLK14	KIF11	IP6K3
MRPL52	BANK1	RGS2	OSR1	FBLN7	JAM3	CATSPER2	ARHGEF33
STEAP1	PTPRR	NODAL	CACNB4	NPAS1	CETP	SHC3	CORO6
ZNF662	LAMB3	NTRK1	SCHIP1	NME5	C2orf15	PRR36	ADAMTSL1
FGF17	TRHDE	CFAP161	PLCL2	FOXP2	POLN	IFIT1	HSF4
CDA	ZNF98	SUSD6	EDNRA	ATP7B	IL3RA	APOLD1	CREB3L1
SYN1	CRMP1	RAB44	IGDCC4	NCAM2	PHYHD1	RPGRIP1L	LCTL
SYTL5	MMP14	SESN2	MAL2	KIAA1211	KRTAP2-3	STXBP5L	KIAA1024
RRAD	EYA4	FAS	LECT2	PDK3	IL16	SLC29A2	ADM5
FAM167B	TMEM229B	FAM13C	SUSD6	MATN2	MYLIP	TUBD1	FZD2
PSMB9	GRHL3	CFAP43	DISP3	GREB1L	FGF1	CTC1	FBXW9
AMIGO2	NACAD	TRIM22	TLR3	EGLN3	KDM6B	ZNF572	FBXO36
FOXD4L1	IGDCC4	PPARGC1B	FLNC	SMAD6	CCDC121	PEX11B	PHYHD1
XDH	LAMA1	RIPOR2	GBX2	BRSK2	HSPA5	RNFT2	CCNA2
GPR4	CSF2	DLL1	SIPA1L2	SYT15	ADSSL1	AC023509.3	SIRT4
ROBO4	MAP6	TCTE1	SEMA3B	ZNF708	MGAM	NDC80	GPC6
PLA2G4A	NETO1	RAB39B	ADAMTS13	HAS3	SULF1	C9orf84	PDGFRL
DUSP6	ZNF488	NTN1	SIK1B	SAMD11	FAM83E	RSBN1	BHLHE41
ZBTB8B	MAP3K5	DLL4	ARG2	PCDHGA6	GPR37L1	TMEM71	PECAM1
BMPER	CYP26B1	ZDHHC11	POU2F2	ASB16	F10	SCN8A	CPM
RPS29	SERPINB2	LIPC	HRCT1	PCDHB12	RAB26	KNSTRN	ALDH6A1
LAMB3	ABLIM3	SOWAHD	CT62	PAPPA2	PALD1	SLC4A8	SIM1
SLC7A7	ZNF608	CCDC121	SERINC5	TBC1D2	PCDHA3	CCDC30	LRRIQ1
FAM19A3	RALGAPA1	RASL11A	POU4F2	BMP4	OLFML2B	SZT2	FKBP1B
PCDHGC5	TPBGL	ALPK3	HAS3	DCAKD	TUBB3	CCDC18	SSTR2
CLIC3	TRPV3	HCAR2	ANGPT2	FAM53A	GNMT	FKBP11	ZSCAN31
GPX3	LZTS1	CLDN14	HEY1	ATF3	FANK1	MDGA2	NUTM2D
IFI44	TMEM178B	ZP3	ISM2	PRR36	NAALAD2	SPG11	POU5F1
C1orf115	TNFRSF14	TMCC3	ZNF79	DOCK3	MIF	LMLN	HJURP
COL17A1	ADGRL2	EPHA2	SLC16A10	ALDOC	GRIK1	CARD8	ATP8B3
NT5E	HOXB13	ANXA8	IL2RB	SAXO2	GNB1L	CGNL1	FAM229A
SLITRK4	GABRQ	SIK1	BCL2A1	ADAM12	HOXB8	DCHS1	RARRES2
MMP14	DCHS1	FOXL1	KCNJ12	MAP3K7CL	GEM	MYCT1	DZIP3
S100A6	TRPM2	TMEM236	EPAS1	AL135905.2	IL12RB2	HIST1H2AI	GTSE1
PTPRN	KIF21B	RIMS4	MAPKBP1	EPHA4	PDK4	ZKSCAN3	PDE6D
NTM	MTUS1	ITGA2	NTRK1	RAB6B	LEKR1	GPRC5B	SLC12A8
SH3RF3	DGAT2	C2	RAB38	TMEFF2	FAT2	EDDM13	C1RL
PLAG1	MOB3B	HMOX1	C9orf72	DNAH1	PKD1L1	GLI2	ALX4
NEDD8	INSRR	ICOSLG	TRPV3	FAT3	ID4	SLC1A1	CCDC28B
SH3TC1	ATP2B4	AEN	NKAIN1	GOLGA6L10	HACD4	CTPS2	RBMS3
TPK1	FAM184A	IL6R	EPHA2	RPH3AL	DDIT4	ASAP3	DEPDC1B
STEAP3	RAB27B	DTX4	KIAA1324	NFATC1	KIF17	IL34	DNAH5
CSGALNACT1	DOCK9	FAM83H	PRKX	SLITRK5	MXD3	C5	FOXO4
ASS1	SLC38A3	TP53I3	RGCC	ZNF586	LHPP	SULF1	C12orf60
SAMD3	CHML	SFN	SPTBN5	LOX	ZIK1	NRK	CDKN3
EPHX4	PTHLH	TBX3	BLOC1S2	PPM1E	SLC8A2	ARMC9	CD14
TMEM256	COL4A6	PLEKHF1	EPB41L4B	GABPB2	SLCO2A1	PAIP2B	PDE1C
RASL10A	SLC26A2	FLRT3	ASCC3	NLGN1	MYH3	TRIM62	CDC42EP5
CRABP2	ASTN2	ZMAT3	FGFR3	ZBED3	JUNB	SLIT3	KIAA0825
LCP1	PITPNM2	ABCA1	NANOS1	SLFN11	SLC34A3	RAB40A	CCDC113
ROBO3	SOBP	GSTO2	TINCR	ACTG2	STAC3	SLC25A27	PCED1A
AFP	ITGB3	N4BP3	SLC9A1	THEM4	ZACN	CC2D2A	BORA
NOX4	ARHGAP5	OPCML	ZFP36L2	ANKRD1	NRTN	MID1	JPH2
PDLIM4	GAB3	ABTB2	TRIML2	ZNF518B	ST6GALNAC5	CENPA	GBP5
COL7A1	MAN1A1	ADRB2	PIDD1	GGACT	ERBB3	CCDC85A	RPS6KL1
ANKRD7	RUNX2	PRDM1	USP18	APBA1	CAMK1G	DTNA	PAQR5
SDR39U1	STYX	SHISA2	CCRL2	SH3BGRL2	LRRC4	ZMYM1	SRSF5
OPN3	RAB39A	CLEC18B	PDE2A	TOX	SYCE2	USP13	FILIP1L
SLC25A37	SLC40A1	OSR1	AC099489.1	ARHGAP20	GSTO2	SCUBE3	ZNF385D
CHCHD10	IL1R1	NRXN1	ARIH2OS	PHC3	HIST2H2BF	SASS6	LZTS3
SOCS1	TMEM139	B4GALNT2	KIF26A	CFAP57	CAMK2B	GRIK2	SAMD11
DGAT2	PARP10	SDK2	ESM1	BTG2	C19orf71	NEGR1	AKR7A3
CD82	GK	PKDREJ	COL25A1	CYP3A5	TXNIP	PLEKHH2	MAP2
CCNB3	MAP1A	CSF1R	CYGB	FGFR3	QRICH2	ABI3BP	AMDHD2
PLEKHG4B	SLC22A15	SBSN	KRT34	REEP1	EPB41L4A	SLC16A7	CBY1
SPN	RABGGTA	EPPK1	2022-09-05	APBB1IP	NYNRIN	ANKRD28	SLIT3
S100A3	CA12	SOWAHC	CLDN14	DBNDD1	FBXO24	GPR1	SDK1
COL8A2	PDE4B	ZIC2	RUSC2	GRTP1	NUDT17	SENP7	RNF207
MX2	NRP1	CD83	ARHGEF37	ATF7IP2	FAM131A	NFATC4	RBL2
S100A2	NDUFV2	MATN4	HMOX1	TXNIP	PSRC1	RHOBTB3	NBEA
PGF	MLLT11	EGR1	MFSD4A	CCDC191	PRUNE2	SNX29	PIEZO2
MOCOS	IL2RB	PTPN22	DUSP4	MNS1	BTN1A1	TRPC4	EGF
SLC22A4	FBXO2	NR1D1	ASNS	LEF1	GADD45A	RBL2	CHN1
CYP2J2	PLEKHA5	NR4A2	C3orf52	MEIOC	MISP	LRRIQ3	GLIS1
LTB	KBTBD11	DDN	NPR3	FAM89A	RAMP2	MYEF2	ID4
WFDC3	LRP10	SLC5A2	CGB7	GOLGA8N	TEX29	CDCA2	CIART
IER3	BTBD8	PSTPIP2	DUSP14	MKX	RRH	CEP295	BUB1B
RHOF	TIAM1	NFATC2	CXCL16	STAT5A	TSPAN18	TBC1D5	MFSD3
ARSI	RIMS4	OSGIN1	PCDHGA12	CTGF	MGAT3	TET1	HIST1H3E
NRROS	DEPDC5	KCNJ2	PTPRU	ZC3H12B	BEX4	MSS51	LRRC20
CHSY3	TNS2	ETV7	RNF152	EFCAB13	LOX	NR2F2	DAW1
TIMP1	DENND5B	PODXL2	LRRC4	LARGE1	NOP2	TANC2	TRIM59
ARTN	KLRG2	MGAM	RHOB	DLGAP3	RAMP1	FAM78A	IQSEC2
NYAP1	HARBI1	SNAI3	SLC12A7	HOXB9	RPH3AL	SEMA6A	NPAS3
SLC37A2	SAMD5	IER3	ARVCF	DIRAS1	RTL3	MPDZ	GFRA1
RPL36AL	SRPX2	COL15A1	RBM14	KIAA0513	LIMS2	PEX11A	SNCAIP
TMEM132A	LAMA5	PROKR1	ADGRL3	PHYHD1	GFAP	IFT122	HOXA2
CEBPD	FMN1	KBTBD8	FRRS1	EXO5	FES	INTU	TMEM169
GFPT2	CLCA2	UNC13A	AHNAK2	PRKX	TACR2	PTPRJ	TMEM143
IFI6	MRPL53	SMOC1	PLXNA2	COCH	BGN	NR3C2	GRIK2
CYP2S1	COL8A2	PLK3	DUSP7	TTLL11	CCDC146	BAZ2B	ASPHD1
CPE	REPS2	FSCN1	PMAIP1	CYBB	NEUROG2	TTC8	SMYD3
PSME2	ZNF341	SPTB	LHX6	SLC17A7	DNAJB1	TRIM66	NIPSNAP3A
NRP2	ADAMTS12	CBLN2	KCNN4	PDE5A	SEMA3E	CCDC169	OIP5
PKD1P1	RASGRF1	ITGA2B	LHX2	ZNF772	MAP3K7CL	MYO5C	GJC2
PBDC1	LRFN5	LYNX1	E2F7	MAPK8IP2	ADAMTSL1	FAT3	CFAP44
TRNP1	FANCM	LRRC4	TNFSF9	TPPP	LTB	GALNT5	MYOCD
FTH1	MIA2	CHST2	ZNF195	GPCPD1	ANG	PXMP4	TP53
TBX3	NT5E	PPP1R15A	OSBPL3	SCAI	UTS2B	PGPEP1	LRRC7
SLC15A3	DGKA	KLRG2	PCDH9	USF3	C6orf132	ST8SIA6	PRKAR1B
ALDH2	IGFBP4	PROX1	RAB39A	PTPN13	SPNS2	CPM	TSTD3
RINL	NMNAT2	VWCE	HK2	PDE4A	AL162231.1	LAMA3	NEIL3
GPR158	CACNG7	PPM1D	SLC16A6	GRHL1	LRRC43	LPP	RSRP1
NMNAT2	MAML2	CLDN16	TRIB1	LBH	DIO1	CCDC150	ZNF608
MAGEA6	MSC	SEMA7A	OPCML	EFNA2	TMEM119	KIF23	AK5
ITGA2	IRF9	RNF152	SNAI3	USP44	PIP5KL1	WDR19	SLC38A4
FABP6	CDCP1	TNFRSF10B	PCDHAC1	CCDC74B	LRRC56	ZNF396	SPACA6
C1orf53	LRP4	TNFRSF10D	SLC25A45	PLSCR4	AL157935.2	MYPN	CREB5
PTPN22	RNASEL	ABAT	ABLIM1	LHPP	NGEF	HECTD4	MYZAP
IKBKE	STXBP5	PLEKHG6	KIF26B	ZNF121	MAP7D2	CMTM1	METTL3
SOD2	SHROOM1	ACAP1	CTGF	BDNF	KRT80	HJURP	NXNL2
LFNG	B4GALT6	GAS1	CAPN12	TLN2	EFNA1	TTC28	SLC39A13
CD302	PEAR1	TEK	CALB2	ZMAT3	NPIPB9	BRIP1	GYG2
THBS1	CEP250	TDRD12	PALM2	RGMB	FAAH	ANK2	HOXB8
EVA1B	NOVA1	WNT9A	CHRD	ALDH5A1	EEF1A2	WDR60	ASB13
CCDC88B	ITGA2	SELPLG	LRRC71	SLC6A9	PILRA	ZNF714	GULP1
INA	L3MBTL3	FES	NT5C1B	SCHIP1	OR2W3	VGLL3	AFAP1L1
BRMS1L	TRIM22	SERPINB2	GPR37	TTLL3	MATN2	CKMT2	VEPH1
SRPX2	TAB3	AC007906.2	N4BP3	C6orf132	FBXW9	LYST	BABAM2
ICOSLG	SETDB2	FOXC2	TBR1	ZBTB5	NXNL2	ZSCAN30	IFT140
PTPRR	TMTC3	CPNE5	HSPA1A	VPS13A	TRIM73	ACCS	IMMP2L
TLX2	VILL	MAFF	NTN3	ATP8A2	KCNB1	THSD4	SORT1
SNCG	PURG	C11orf91	SEMA3F	RNF39	AP3B2	CLIP3	SYTL3
ADORA1	SEMA3F	ACSBG1	ADGRF5	ITPR1	NIPSNAP3A	BRWD3	MAP3K8
TRHDE	GRIK5	LGALS9	COQ8A	PDK1	TMEM269	TTBK2	RPH3AL
CTSW	HPCAL4	RAB38	IL12RB1	LXN	C7orf61	FAM160A1	ARHGAP11A
HTR7	G0S2	RHOV	CES2	LRP3	CKS2	CTSK	GTF2IRD2
ABTB2	TANC2	PDGFA	ALDH3A1	MYBL1	MYCT1	MMACHC	BEND6
NFKBIA	ORAI3	MYO10	FBXW7	INSR	PLA2G4C	SPA17	IFT80
FP565260.3	CAMK4	LECT2	FSCN1	ZNF441	FBXO10	CTNND2	HIBADH
ETV1	COL9A3	TEX29	PPARGC1B	KDM4B	2022-03-11	KNTC1	LCA5L
AP4S1	MEIS1	KCNN1	WNT11	OBSCN	CLDN9	CDC25B	SLC25A42
RAB42	HECTD4	CCRL2	PTK2B	RRAGD	ELFN1	KIF5A	AC068831.7
PHLDA1	PCDHB3	TRAF4	FZD5	TFDP2	PLEKHG6	WDR31	P2RX7
EMC9	MLPH	TEKT2	SERPIND1	TGFBR3L	CSPG5	CCDC88A	CDH5
ANKEF1	ZNF677	HIC1	TJP2	ZNF471	SERPING1	CEP126	QPCTL
PSMB5	NEMP2	KCNJ12	IGSF9	GALNT5	LIF	CAPS2	CCDC191
TNFRSF11B	ZFP14	THSD1	CFAP97D1	SLC1A1	SLC16A11	FAM135A	TXNIP
EBI3	TRIM9	SULF2	FAT1	GADD45B	AC007240.1	DCAF8	ID1
MTHFD2L	DDX60	CPEB2	TMC4	OLFML2B	SHISA7	DYSF	BMPER
COL6A3	ZNF284	FZD8	RPA4	HID1	TFAP2E	SLC17A5	SHLD1
SPTB	VPS13B	ALDOB	FBXW10	ADCY9	POU6F1	IPO8	MCCC1
IRS1	NRROS	TNXB	LST1	RIMS3	RCSD1	PPP1R12B	EXOC4
CLIC2	ZFYVE26	EXOC3L2	ZNF654	ZNF699	LAG3	FBN1	ARL6IP5
ZNF792	BRWD3	ASPRV1	VEGFA	JAG2	CCDC189	NMU	GGT5
LPAR3	BRMS1L	C5AR1	PTGFRN	TMEM8B	FUOM	IL17RD	KIF5A
MAP6	FTH1	WDR38	CHRM4	SAMD12	MGARP	NCAPD2	SALL2
MTHFS	TRMT1L	B4GALNT3	CD274	VPS8	CHRM2	CAPN5	COQ10A
PTPRU	SORL1	IL1RL1	NCEH1	ZNF493	TRIB3	ABCA3	MYRF
PLPP4	N4BP2	YRDC	OTULINL	CFAP46	OPRL1	PHF21A	DHRS1
PTPN20	XDH	EGFLAM	PLIN4	RHD	KIF26B	DNM1	CCDC65
FAM241B	GXYLT2	STEAP1B	SYTL1	SPICE1	ITGB4	PDGFRA	TRPM2
PRLR	ABCB9	IGDCC4	TRIM35	IGFBPL1	GAS1	AGL	AHRR
CCL2	NTM	LCK	ZNF114	EVI2A	GNRH2	COG6	CAMKMT
ATP5ME	HECTD1	FP565260.3	AMER1	ECHDC2	ALDH8A1	KIF16B	RAD51B
BMF	WNK3	DUSP7	ESR2	DSP	ASIC3	C1RL	SPAG5
ZP3	PLAU	IL18R1	COL10A1	PLAGL1	FAM184B	CCNB2	ARL17B
AQP3	PRDM1	XKRX	RGL1	PCDHB10	GPR17	JAK3	FAM83D
TNIP1	MMP2	EPHB3	LRRC8B	CCDC159	NDN	BBX	MILR1
SCARF1	PIDD1	HLA-DOB	PCDH10	P3H2	RASSF9	ZFHX4	CD37
APOE	NBEAL1	ZC3H12D	ENHO	TRIM58	CYP27B1	PRKCA	RAB40A
CD14	FOXE1	QRFP	TPPP	LLGL2	SENP3-EIF4A1	TMEM139	RASGRP3
CACNG7	PSD3	FBXW7	GAL	B3GNT10	GRIN3A	DZIP3	ME3
NAT14	KCNN4	SLC25A32	ERN1	IL33	AVIL	SMC4	STX10
RAB27B	SYNJ2BP	KRT15	TMEM64	HSD17B1	TREX2	EXOC4	PBK
PLEK2	SH3TC2	KIAA1257	TNFAIP3	YPEL1	ADM2	ADAMTSL1	TMEM53
BATF3	ZBTB47	ESM1	GK	SLC44A2	CACNG4	ACBD7	MX2
SLC38A4	CPLANE2	FAM83A	CSF1	NIPSNAP3B	SAMD4A	DBP	CSDC2
HOXA5	TBC1D32	MSH4	APAF1	PNPLA7	RPS6KL1	GLCCI1	SPATA1
PPP2R3C	MED12L	MMRN2	RTN4R	ZNF136	KIRREL3	ACSF2	ZFP2
ROMO1	USP27X	KCTD12	CPEB2	SLIT3	ARRDC4	LRRK1	TMEM232
ADGRE1	NOVA2	DNAJA4	TEX15	SLC16A10	PDZK1	NEK2	ELF3
MTFP1	VCAN	PIWIL4	PTGS2	ZNF57	PTK6	GULP1	ETV1
OTOGL	SNX19	IL3RA	PARM1	FAM107B	PSG9	SPEF2	NFATC4
TRIM36	HMGA2	G0S2	FSCN2	ONECUT2	TDRD12	FAM20C	TPX2
MISP	STOM	2022-09-04	PLEKHG3	PIGZ	OR7D2	RHOBTB1	PPP1R35
SLC45A1	TRPS1	CCER2	OAS2	MISP3	HLA-DOB	GPR39	INCENP
STX1A	SLC6A15	LRRC56	LEF1	AMOTL2	ADCY5	CCDC171	KIF11
RILP	ZNF318	MYEOV	RASD1	GCNT1	EPHA5	SLC25A42	TUBA1A
HIST1H2BD	ARG2	IQCN	ZNF337	SYNE2	TMEM262	STAT2	LOX
DNAAF2	HOXB4	B3GNT7	TCTEX1D4	ZFP28	TRPM3	HEXIM2	MMAB
LHX1	ADAMTS15	RINL	ADM2	IQCB1	KCNAB2	KIAA0586	CAPN5
TRIB1	RAB42	ZNF418	DAGLA	FOXC1	TCTE1	LIMCH1	KCND1
GPSM3	CARD6	HUS1B	SORBS1	ZNF433	RHBDL3	ZBTB3	CA9
EMC6	CBLN3	CYP26B1	YBX3	NCEH1	FOXL1	ZSWIM5	NTN4
ITGA1	VWA8	NRCAM	CHD7	EVI5L	CFAP43	ECT2	ANKLE1
TAGLN3	DNAJC16	GCNA	AK4	PCDHB14	ABCA10	FYCO1	NMRK1
VKORC1	L2HGDH	PLCL2	SLC1A4	ARHGEF9	SLITRK3	OSGEPL1	WDR92
ADAM8	PLEKHG2	STRA6	COMP	ASIC3	PYROXD2	ACP6	NUDT6
C6orf141	PKIA	KLHL21	CA14	SMARCA4	DEPTOR	SEMA3A	C11orf49
ANXA10	PPP2R2C	WNT11	BTBD10	MCOLN3	CCDC81	KLF9	SEMA3E
CCDC9B	ZNF311	TBX2	SGPP2	TLE4	RSPH9	FOXP2	ZFYVE28
ETV4	KIF5C	ZG16B	P2RX5	MPP7	NUPR1	SMC2	SPN
SSTR2	PITX1	GCNT4	SOWAHB	ZNF618	NUTM2D	SBF2	EMC9
IL31RA	ARAP1	NOV	SCN3B	GYG1	SNCAIP	LRRC8D	ARMC4
RAB13	MAP3K12	ADORA2A	LYSMD2	IGF2BP2	SMKR1	NUF2	C9orf116
RPL26	DHRS13	NTN3	PRDM1	NFIB	TRAF1	PIH1D2	NRTN
PABPN1	SLX4	MFSD2A	RGS4	ABCA3	FAM86B1	DLX6	KIAA0556
APOBEC3G	EPSTI1	NUTM2B	PDK3	ADGRL1	LNP1	HYKK	DDAH2
TMEM249	CCDC3	IER5	FZD1	DNAJC6	KRT33B	ZNF555	TMEM242
P2RY2	GPR87	TNFSF9	ITPRIP	ANKRD18B	ENDOG	ST3GAL3	ZNF837
SLC18B1	ADAM19	GDF7	PSAT1	NATD1	MKX	ST6GALNAC5	NLGN1
SLC6A15	ERO1A	TCTEX1D4	SPRY4	SEC31B	CDC20	NCAM2	ZNF763
ELMO3	NHS	TP53INP1	STX6	ZNF594	SPNS3	DIAPH2	PAIP2B
NRP1	TNRC6B	BTK	CHST3	KALRN	OPRD1	DNAJC27	SWSAP1
OLR1	TMTC1	TMEM88	GGT1	FAM162A	INTS6L	BBS9	PDIA2
ZNF22	RAPGEF3	F2	CEP170B	PTPRS	SETSIP	MIS18BP1	POLR3GL
RABAC1	TSHZ3	2022-09-05	SETBP1	FAM129A	SATB1	CEP70	FAM71F2
GDNF	SLC46A3	INHBB	PHLDB3	CENPP	PTPN6	HID1	KLC4
PARD6B	LCP1	C7orf61	JARID2	ZNF442	LONRF3	ATF7IP	CPS1
PLK3	TMEM131	ATP10B	ENC1	CYR61	NANOS3	FAM172A	SCG2
SLC39A14	TNFRSF21	TRIM36	SNAI2	LMLN	CDON	ATP8B3	NCAPH
MOB3B	GM2A	NUAK2	TAB3	ARID5B	CDC42EP5	USP30	TPCN1
HMSD	LRRIQ3	PDE2A	GPC1	TNIK	ETV2	MYRF	MTFR2
FGGY	NPAS2	HGFAC	TBX2	NEURL1B	ZNF878	SRBD1	2022-09-06
SQOR	JARID2	BLOC1S2	LONRF1	DOP1B	TAGLN	ATP7A	TBKBP1
MMP2	PDLIM3	RND3	ZP3	ZNF275	DHRS12	SPACA6	LXN
ITGA7	LMCD1	TRIM35	AMOTL1	NFIC	NR4A2	CCNA2	HSD17B11
RARRES3	SCUBE3	C3orf67	PHLDA2	KCNQ5	SEMA4A	TSPAN19	FANCD2
SMOX	GPR158	EPB41L4A	FUCA1	KDM7A	GPRIN3	FBXO16	SCX
RPP25	SULF2	CD274	SLC49A3	PHGDH	GSDMB	DIAPH3	LSS
MLPH	MED20	SLC2A5	TET3	PTCH1	HSPA1B	COL1A1	LAYN
HMGA1	ATP13A2	VEGFA	STYK1	PDE1C	SCUBE2	PRKD1	RALGPS1
TSHZ3	NANOS1	CHRM4	RND3	DHX58	FO681492.1	MAGI3	ERCC2
EMC10	ABCG4	LILRA6	ZNF30	NOTCH1	CIART	NPHP1	SLFN5
GPR137C	HERC3	CD200R1	MED12L	OTULINL	TUBB4A	TRMT1L	FNDC11
LRR1	GUCY1B1	ALDH8A1	GCH1	FO681492.1	C9orf84	MYLK	C6orf141
IFIT2	TTC30B	SYNE3	TGFBRAP1	YEATS2	IL34	STAC2	CDA
TNFRSF21	IFNLR1	NECTIN1	MEIS1	ABCA5	FGF22	TBC1D8B	IFT81
DHRS1	DDHD1	STAB1	FGF12	KIF27	SLC12A8	MITF	DLX4
HTATIP2	ESR2	C9orf24	SLC8A1	CREB5	KCNS1	ARMC4	SLITRK3
DUSP5	OAF	CRYBG2	EPS8L2	CNTRL	SMPD3	BRD8	CBSL
NES	FCMR	GDA	SOWAHC	SLC25A36	FTCD	ZNF763	SLC26A10
KCNN4	COL6A3	ZNF79	NDUFV2	GPR155	EDA2R	CEP128	ATXN1
QPCT	RAB39B	SLC22A1	ABCB9	CCDC149	PCSK6	CKAP5	BCAS3
KCNS3	C7orf25	TRAF1	IL16	ANKS6	MYC	FOXRED2	PEPD
TMEM200A	PCDHGC3	SPNS2	HIC2	SIM1	GSTA4	ADGRG6	MUC1
NKX3-2	CPLANE1	STXBP2	PRKCD	GOLGB1	IGFLR1	MAMSTR	TMEM104
KDR	MTHFR	GPBAR1	RAP1GAP2	SPACA9	CHAC1	TMTC1	GALM
VANGL2	AKR1B1	KLF5	CNNM4	CNKSR3	FAM89A	CERKL	NPAS4
PSME1	FADS1	IRF1	JPH4	CTH	AIFM3	CDK5RAP2	ABLIM3
MRPL12	2022-09-04	TRIB3	SRGAP1	ADGRG6	SCRN2	INVS	DBF4B
IRAK2	FAT4	HEY1	ARHGAP4	OSBPL5	COL13A1	PCDHGA9	HMG20B
CENPS	TNS3	C3orf52	ARID3A	CNTLN	SYT12	FN1	MAPK10
GRIN2D	CLMN	FAM131B	LHX9	FAM69B	RPS28	ZNF165	ARHGEF6
NFATC4	QDPR	SORCS2	PRKAB2	DIP2C	NOSTRIN	TMEM67	RACGAP1
PSMB10	ENTPD5	HEATR4	FAM83A	C2orf88	FN3K	MXD3	LRTOMT
POLD4	GAREM1	APOBEC3G	ADAMTS15	SEL1L3	ACAP1	AGPAT4	LNP1
CYP2R1	DOCK10	DUSP14	PRKAB1	KLC3	GPBAR1	ARL15	FAM117A
FAM43A	ETAA1	TRANK1	GPR146	HLTF	FAM162A	IFT81	POLD1
CLDN14	TSPAN1	GPR3	CAV1	PIH1D2	SHISA2	BEND7	GAS2
CEBPB	CHST11	B3GNT4	CEMIP2	MFSD14C	SLC2A5	HERC4	DNM1
NFATC2	MIPOL1	MRC1	ISM1	KIAA1958	SLC13A4	MED12	SCD
TNFAIP3	VNN1	IL12RB2	NUAK2	DNM1	ACBD7	ARID4A	ALG14
PARP10	SYT14	PRLR	DUSP6	BCL6	HMMR	FAM227B	CTPS2
REPS2	ANXA8	VCAN	CCNK	LRP5	DNHD1	PRKACB	PIWIL2
GPS2	DNAJC18	MAP2K3	SEMA7A	ALDH3B1	DOK2	SYCP2L	SLC25A10
NDRG1	VDR	ATP6V1FNB	PRAG1	ZNF169	TENT5C	ZC3H12B	COA3
SPINT2	TOMM40L	PTX3	SYNM	MVB12B	ACRBP	MBNL2	COX6B2
FGFR4	FUCA1	ANKRD33B	FZD8	UBXN7	AC011448.1	EGF	BBS9
ANTXR2	ALDH3A2	PPP1R3F	MTHFD2	GALNT16	CDK18	SPAG5	EPHB2
NPC2	CLDN1	DEF6	RIOK3	ZDHHC23	FNDC11	E2F5	GNMT
CITED4	AC092835.1	GPR61	MYOM3	XRN1	AOC2	ZFYVE26	SPAG7
CFB	IL36G	HES1	SLC30A1	ZNF431	TNXB	NCAPH	THYN1
HIST1H3E	PDGFD	SNAI2	PGAP1	ARHGEF5	GIPC2	ATXN7L1	PINK1
APOL1	PID1	TNFRSF14	KRT15	RBMS3	SERPINF2	VMAC	GXYLT2
PCDHB3	LACC1	RPRML	ALS2CL	CYB5RL	PDIA2	MAP7D3	XRCC1
TLR6	CXCL1	SSC4D	LYPD5	ANKRD33B	SMAD6	CD163L1	DNALI1
SPATA6L	EVC	PANO1	KCNC4	MUC1	TMEM160	NTN4	KCNMB4
DAD1	SH3KBP1	OAS2	ACTBL2	ZNF440	KRT19	PARP4	TPM1
ID1	PLEKHH2	STKLD1	CDKN2B	MAPK10	LY6G5C	MEGF6	CLIC2
MFAP2	FGD4	NKX3-1	ENKUR	TCF7L1	SEC31B	OR2W3	HAGHL
TM9SF1	TET2	ATOH7	PPL	MINDY1	ZNF738	JADE1	PEX6
GLS	TGFBR2	GDF9	PARD6G	SPATA7	DAPK1	GEN1	TMEM150A
STAMBPL1	KIAA1549L	KCP	IFFO2	GNAL	THAP2	HFE	TCIM
COX6A1	LRP1	SIX2	CERS6	SRRM3	DCDC2	TMEM19	DHCR7
VGF	FIGN	EHD1	SYT16	NFIX	EFR3B	KIF24	DALRD3
TNFSF12	ADAM22	PLAUR	SP6	UHRF1BP1	ICAM5	SATB1	TDRKH
ATRNL1	DST	POU2F2	CEP85L	MLLT3	GTF2IRD2	SYT14	POC1A
BCL2L2	ISPD	HUNK	ARAP1	CCDC14	PIWIL4	ST3GAL5	PALM
TUBA4A	NFATC4	ENC1	CHST2	RGS11	NPIPB2	TMEM178B	TCAP
NOG	MBOAT1	CLP1	VWCE	EDN1	ATOH7	TENM3	CEBPD
MAGEA3	ATP7A	NUDT10	MAP1A	CARM1	AMH	RASGRP3	MATN2
PHLDA2	DUSP18	DUSP10	IRS2	CC2D1A	TMEM220	ARHGAP29	THEMIS2
TMEM59L	SERPINB10	TULP1	PTHLH	EIF2S3B	STX10	COL5A1	DBP
NGDN	APH1B	ULBP2	HSPA1B	CD55	TMEM217	ZSCAN23	TEF
SEMA6A	TRIML2	MISP	SLC48A1	VGLL3	SLFN5	MTERF2	NIPSNAP1
FKBP3	CASK	AC011448.1	PID1	DSEL	HLA-DMA	HECW1	ACOX3
QDPR	NOTCH3	SLC9A1	KCTD12	PCDHB9	DNAH1	GRIP1	SPA17
MILR1	PCNX2	COBLL1	PODNL1	DENND4C	KYAT1	ETFBKMT	CC2D2A
FBXO27	TRPC3	PPP2R2C	MT1E	STRBP	GPD1	FGF5	OBSL1
PSMB8	ANK3	LBX2	PAQR9	KLF7	DUSP8	HOXB3	LRRC27
ATP2B1	CARMIL1	GAL3ST4	BEND3	FKBP15	GATA2	ARHGAP12	AIG1
PHETA1	APOL1	PLIN4	IL1A	ZNF738	MYH14	SWT1	YPEL1
VCPKMT	SLC11A2	NLGN3	TENT5A	HIP1	ZNF425	TPX2	FAM72B
IGFBP4	FRMD5	BICDL1	RASL11A	GLI4	TMEM38A	BAHCC1	PYROXD2
PRRX1	CCNF	ANGPTL2	FOS	MYO5B	NEXN	CDC25C	HIST1H2AC
EFNA1	PARD6B	BAK1	ELAVL2	CDKL2	EPHB3	TTC30B	TMEM256
LTBP2	AC093323.1	LAMA2	TBX3	ANKRD13A	NLRC4	DAB2	VAMP2
RGS17	MYCBP2	CCDC62	SRA1	TET1	BCL2L15	GRIN2A	SAMD4A
GNG11	PREX1	F2RL1	NTF4	REEP6	CCNB1	ARHGEF17	PNKD
CCDC3	PAFAH2	KCNN4	PROCR	ELOVL2	CCDC80	REPS2	RND2
PPP1R35	HOOK1	BCL2L11	GABRQ	SLC25A23	TCTE3	AASS	JAM2
CAMK2A	PPM1L	TMEM238	ZNF385A	MBNL2	LGALS9	CDK19	TXK
MAN1A1	HNF4G	ADM	GPR3	ZNF44	CFAP161	BCL3	ADAMTS3
SLC22A3	SEC23A	KRT34	RTL5	GAA	OSGIN1	TTLL1	SLC25A27
ATL1	PITPNC1	MTTP	GXYLT1	ZXDC	RDH12	USP54	SLC17A5
FMN1	HIVEP3	RPP25	TGM1	CXCL16	TTLL11	CFAP57	OLR1
JADE2	MFAP3L	MFNG	EAF1	PAIP2B	ETFB	ARL17A	HMGN3
GEMIN2	SIPA1L1	WHRN	PLK3	OPHN1	CARMIL2	AGO4	RARB
TMEM158	ZNF792	C9orf72	FNIP2	BCAS3	CACHD1	NUP210	DNM3
PCSK1N	FGF2	CFP	CYP26B1	RALGPS1	FBXO36	LURAP1	IGIP
VASH1	DMD	PLXNA2	RAP1GAP	MANEAL	RASGRP2	CCDC173	HSD11B1L
PCDHB8	TP53I3	RNF125	TMEM121	TMCC1	DNAH11	NBAS	RIDA
MIA2	GDF15	JMJD7	C1orf198	MYLK	COL11A1	VWDE	C5
INSIG1	FUT8	JUN	SIK1	RAB9B	ZDHHC11	NIF3L1	RALGPS2
PPM1M	ZNF624	LPAR5	TRIM26	STAT3	ZNF512	LAMA5	ARL14
HSPE1	FBXO33	C1QTNF1	KIAA1755	ZNF774	EVI2B	DNASE1	HMGB2
DHRS4	PTGIR	GLTPD2	URB1	TRIM14	GUCA1B	LDAH	HLA-F
CPED1	ZSCAN23	HPX	SDC1	NGF	MAP3K8	ZNF891	PLEKHG4B
LIMD2	TIMP1	ARG2	DSP	ZNF439	CCNB2	KIF18B	PCBP3
P4HA2	SSH1	TMEM92	CCND1	GARNL3	KIAA1024	SH3D19	CYS1
MAP3K5	PRRT2	BATF2	ABL2	ERBIN	BEAN1	KRT80	PARPBP
TCAP	ZNF879	CXCL5	ISPD	TMEM47	OSBPL5	TLN2	HFE
COLEC12	ZFHX4	PLD6	LBH	F3	PALM	TNRC6B	TMTC4
SPRY4	FAM102B	DHRS2	GPR75	DLG1	FAM218A	KIAA1147	MYH15
TRIM16L	WDR17	PCDH12	P3H2	PXYLP1	CCL5	PLSCR4	ALDH16A1
VAMP5	PCDHAC2	ISG20	RAP2B	ZDHHC21	CLDND2	USP28	CFD
ADRB2	ZNF30	SPSB1	ADAMTS5	C5	ARHGDIG	PARP9	FO681492.1
PSMC6	ZBTB7B	KDM7A	GALNT4	NEK3	STAP2	KDM5B	RFX5
FHOD3	CCDC134	NLRC4	UBASH3B	RAP1GAP2	TMC4	G2E3	SPC25
LOXL3	ARHGEF10	LYSMD2	DUSP11	COL11A1	SLC6A9	YPEL2	POU6F1
SEC23A	DSG2	LAT2	ANKRA2	FAM117A	KLHL35	PNMA2	LAMB1
DHRS4L2	ZFP3	C9orf152	GALR2	CBX7	SIAH2	TTC3	TRAIP
TMX1	ANKRD26	RASL10A	SIX2	ATP11B	HSPB9	CLCN5	GNG7
MLLT11	RIMS2	RPA4	STK17A	EPB41L2	ST8SIA5	ZNF70	SARDH
EDNRA	AGAP1	SNAI1	ZNF563	ZER1	HSPB6	TGFB2	ALKBH7
CBLN3	DMXL2	MT1E	NPR1	ATP6V0A1	VSTM2L	ZNF248	CDC25B
ZNF511	SLC10A7	STX6	BCL2L1	LONP1	FJX1	MUC1	KIAA0319
UQCC3	PCDHB2	CACHD1	INSR	KLHL11	MYLK3	SPTAN1	PFDN6
FKBP2	ZDHHC17	FAM189A2	ERFE	PSMD5	HGFAC	ARPIN	TMEM44
FAM173A	KMT2C	RUNDC3A	NFATC2	CCDC74A	FAM53A	ACADSB	SMAD6
UNC13D	BEST1	IRX5	DGKH	PTBP3	EDN1	SLC35E2B	ABI3
TRIM16	TNFRSF11B	INPP5D	EMILIN3	LYST	COX6B2	KCNMB4	ECI2
TGFBR2	CCDC9B	E2F7	EDEM1	SLC25A42	TAS2R5	KCNAB1	ARV1
ADAMTS12	PODNL1	GBX2	IGSF3	SEMA6B	NFASC	HMCN1	RLN2
RDH11	TMX1	GCH1	PLAUR	USP32	NPAS1	CYP24A1	DHRS3
ARF6	CDK14	CTSW	BAK1	2022-09-03	TP53	OXTR	C20orf96
PTGIR	INPP4B	JUNB	ACVR1C	KITLG	CORO6	GPSM2	COL12A1
KCND1	RASSF2	PROSER2	RALGDS	FNBP1	FAM72C	PATJ	ADAMTS2
FEZ1	FAXC	AOC2	C3orf70	PPME1	ULBP1	TPCN1	SSPN
NQO1	FAM160A1	SYT10	EFHD1	CCBE1	AC073111.5	LAMB2	CLEC2D
SFRP1	MAP3K9	PAX9	PER2	STAT5B	MCMDC2	SCRN3	ZCCHC24
PSMA6	COL17A1	LST1	CCDC148	GAPVD1	NEK2	CPLANE2	NOG
HOXB13	TTC9	PTK6	RGL4	APOLD1	ASNS	SAMD9	ZRANB3
PPP1R3F	FAM173B	RAPGEF3	PAX9	EZH1	SPEF1	ZNF66	CAPS
MMD	ZBTB42	PHKG1	TGFBR3	NUDT18	SLC1A1	BTD	SULF1
IL1R1	PRR12	ZNF195	DYRK3	ENO2	KIF20A	C1orf226	PDLIM2
ORAI3	AKAP13	KCNK3	TP53I11	S1PR1	CCL26	PTPRG	AGPAT4
CACNA1G	TLR3	NAALAD2	DDB2	PLCXD2	RASL11A	RAB3D	NUDCD2
PIK3CD	NCOA2	CABP7	CXCL3	P4HA1	RAB20	CFAP46	C15orf65
FADD	PPP1R3E	MYLK3	BLCAP	AGTPBP1	GRTP1	LXN	EEFSEC
N4BP3	SEMA7A	ISM1	MCIDAS	KYAT1	LXN	DLG3	ADAMTSL3
MMP17	CCDC15	STK17A	SMTN	HEG1	BMP8B	SLIT2	HSD17B6
EMP1	SLC25A37	NKPD1	NNAT	RUBCN	FIBCD1	PPIP5K1	RCN3
LGALS3	AARS2	CD82	CD83	ZNF799	RORA	CAP2	BTD
FBXO33	KIRREL1	TUBB3	TMEM131	DVL3	TSPAN31	IFT140	ZSCAN5A
PSENEN	ZNF214	COL11A2	AL031281.2	PARP11	ATP2A1	AGAP2	PAAF1
GMPR2	LRRCC1	PER2	FBXO22	ZNF782	FBXW10	CEP162	BEAN1
CARD6	COL16A1	ZC3H12A	HUS1B	ZNF846	PRKAR1B	CALHM5	LUM
MAGEC2	CDH24	ESAM	DENND2C	ZNF337	FEM1A	GIT2	MSC
SMIM3	EPHX4	SPRY1	SGK1	ZNF254	CTIF	ADGRG2	CPNE1
CHST11	ASAP3	ZNF296	RBM38	WDR17	DLGAP5	IQCH	SMKR1
ASB13	NEMF	PSD	KHDRBS3	FKTN	CUBN	ZNF471	CCDC18
CLDN23	P4HA2	S1PR3	RETSAT	AMIGO1	DNAH12	GRK5	NRBP2
MERTK	ZBTB14	PNP	PLCB2	ZNF417	AK5	ANTXR1	ENDOV
NUBPL	ASB9	HAS3	RBP4	LMO7	ZFP2	GPR135	TSLP
PRDX5	NDST1	SORL1	SOCS1	SCD5	OBSCN	KIAA0319L	TFPI
ARHGEF16	GPR137C	TMC4	CABYR	BNIP3	SLFN13	CFAP69	TMEM67
LSM6	ZNF552	HIC2	USP31	CFAP44	VSIG10L	SENP8	MAGI1
FYB1	PPFIBP1	SLC26A8	NAP1L2	POLR1E	OPCML	PDGFRB	WFDC3
C11orf1	FAP	SLC25A25	KLF5	IL17RD	RADIL	KLHDC1	SH3RF3
EFCAB2	SLC26A1	STOM	ESRRA	CMTM4	DNAH10	TDRKH	C19orf66
S100A16	ERAP2	METRNL	HHIP	ETHE1	BSCL2	EVI2B	TESMIN
RPS21	ARSB	WDR86	MR1	NKIRAS2	RAB44	ZNF318	COMMD6
HDDC3	LTBP1	AMER1	CRLF1	NOL8	KRT7	MYOF	FIGN
ACOT1	DIP2B	TIMP3	PROSER2	FKBP5	ODF3B	SGK494	KYAT1
ARHGEF40	IPP	UPP1	TMEM215	TXNRD3	NCBP2-AS2	CNTLN	HMBS
MGLL	DUSP19	RTN4RL1	ZNF468	SSTR1	PAQR6	CUL4B	FAM72D
ADGRB2	ZNF695	NHLH1	HIPK3	ANKRD36	PPOX	IFT172	MFSD12
LAPTM5	ZMYND8	TYMP	XPC	KRT34	SLC51A	WDR17	GLIPR1L2
SLC22A15	SEMA3B	RRM2B	FRMPD3	C9orf85	ALKBH7	DHTKD1	C3orf18
ITGB8	DSC2	PMEPA1	CXCR6	BRIP1	BAMBI	ADAMTS3	SEMA3A
NKX3-1	SUSD1	PTPRH	FAM198B	ANKRD44	HSD17B6	UBA7	B4GALNT4
SPRY2	TMEM17	AQP3	PSG5	C1orf198	ADAM23	C17orf100	SYT1
RAB3A	STAMBPL1	SERTAD1	TAGLN3	BDH1	ADPRHL1	CPED1	ING4
PRDM8	CCDC136	SCUBE2	BCL7A	WDPCP	REEP6	CCDC102B	DNAAF3
LRRC8C	TTC12	GALNT4	ODC1	MCM2	GRIN1	KIFC1	CARD8
CHD4	SPTBN1	RGS20	TIMP3	LMNB2	WASF3	PARPBP	EBF4
PLAT	TET1	LGALS4	NXN	GPATCH8	NCF2	RACGAP1	TMBIM4
PKIA	RTL5	SORBS1	SOX7	TYK2	MRNIP	WDR27	ASIC3
SYT1	ARHGEF11	MT1X	TSPAN14	PLCB4	TAF4B	GRAMD1C	ABR
POLE4	APOL3	KCNK1	NHSL1	EEF2	TYMP	LEPR	PDLIM7
C14orf119	THTPA	SYN1	TSPAN10	SLC43A1	ZNF814	RECK	ROGDI
SH2B3	EMILIN1	GAL	HKDC1	LRRC8B	EDN2	DDX60	MYPN
IFIT3	PAOX	SUGCT	BCL9L	ZNF778	UBE2C	KLF12	PLA2R1
FAP	LIPG	TENT5A	OXCT2	ABCC5	IER5L	SETDB2	ECT2
KRT10	SOX7	TRIM9	SLC35D1	TRMT10B	KRT32	ZNF839	PDHB
EHBP1L1	PBRM1	NR4A1	FOXC1	GPSM1	CPNE7	DEPDC1B	UQCC2
MFSD2A	CELSR2	PLCB2	TRAF4	C1orf74	DBNDD1	D2HGDH	C7orf31
NTHL1	CRYBG2	MSX1	REV3L	RAB20	GMPR	TMEM143	FIBCD1
TNFAIP8L3	ERMP1	TLE3	KRBA1	TMEM40	PEPD	CD37	CEP44
PDE4B	RARRES3	SP6	AC090360.1	SYNC	LTA	TMTC4	LFNG
ENO3	CASP8	TTC9B	DICER1	REC8	FCGBP	RIMS3	TMCO4
ISCA2	ZBTB40	ZFPM1	APOBEC3C	SEMA4D	TMEM104	DOCK1	LHPP
MZT2B	KCNK6	AL135905.2	TAF3	RABL3	POPDC2	BRD3OS	GVQW2
PRICKLE3	NCKIPSD	BCL2L15	RELL1	PHF2	NME5	SLC9A3	BBS2
CFL2	HAUS4	PADI1	PTBP3	MAP3K13	TBKBP1	KIAA0556	LACTB
PTGER4	HPS5	BTG1	ITPKC	ZNF484	PANO1	CEP112	PECR
C4orf48	FOXP1	TRPV3	ADRB2	TSC22D2	LDHB	TNIK	DYNC2LI1
FAM71F2	METTL8	NINJ1	CYP4F11	NTN4	CACNA2D2	ZNF571	UQCC3
GBP5	EHBP1L1	CEBPB	KBTBD8	CCDC171	IER2	PPP1R26	KIF20B
POPDC3	BBX	APAF1	2022-03-03	ATR	RTN4R	LAMB1	EVI5L
YDJC	ABHD15	MR1	ALDH3A2	FAM83G	IZUMO4	CHN1	DGLUCY
GGH	KIAA1549	PRKAB1	TBC1D2	DKK1	HSPA2	WDR92	C1orf53
THTPA	THAP6	PPIF	PPP1R15A	UNC13B	GJC2	VPS8	RPL22L1
COX8A	ZNF324B	CDH3	ZNF600	MED13	AP1M2	GVQW2	ZNF726
SOX9	CHIC1	CA14	TNFSF14	FUT10	FOXC1	ZNF554	LRRC6
GABRA3	FBXL13	ZNF654	ULBP3	CORO2A	ZNF726	ZER1	NFE4
TINAGL1	KRTCAP2	KLK14	IKZF2	WDR31	CLEC2D	LRRC37A	ABCA3
SPTSSA	PRR14L	HHIP	PLD6	RIMKLB	HMG20B	C1QTNF6	PIGB
CDH24	ARFGEF3	KCNG3	CHAC1	HACD2	ZNF551	PPIP5K2	GSDMB
SNRNP35	ALS2CL	HGD	ADCY9	CDK20	ZNF251	TROAP	ANP32E
TMEM258	CGB7	SDC4	WDR66	RABGAP1	CFAP53	RNF207	TPD52
HIRIP3	TCF7	TMEM200A	FRMD5	DENND4A	APCDD1L	HP1BP3	TMEM187
HPCAL1	CA13	EID3	WWP1	FBXW2	HAGHL	GSTCD	IFITM1
MRPS34	PLXNA2	DOK2	AKR1E2	LPP	C9orf116	NEO1	PRKACB
PDZD2	LRFN3	BHLHE40	WDR43	NUP188	ALDH3B1	LIX1L	TMEM19
APOBEC3F	SNX15	LRRC73	SDK2	RBM43	ASF1B	CBX5	SHF
HIST1H2BJ	UTRN	FOXC1	NDST1	FXR1	DDIT3	CDCA8	PBXIP1
TINF2	SPRED3	RASGRF1	TCAF2	NRTN	SLC45A4	TIMELESS	NOVA1
MALSU1	RBM41	INSYN1	N4BP2	VPS35L	ROM1	AAK1	CNPY4
TXNDC17	GRAMD1B	IRF2BPL	FRMD8	PAK2	SBK1	SMARCC2	GFAP
HHIP	ARID1B	NRG4	CCND3	ZNF814	GABRR2	ESPL1	CARF
IL7	ATRNL1	PTCHD4	SKIDA1	GATA2	ATOH8	TNS2	NSMCE4A
DUSP23	SERPINE2	LZTS1	FGD6	VASH2	TRIM59	EVC	MPST
B4GAT1	IL7R	TNFSF10	RAB39B	MID2	CD37	DIS3L	TNFRSF9
CLDN1	HDDC3	PFKFB3	IL7R	ASTN2	SOX15	SLC46A3	RBM47
TMEM208	MAP4K5	DPYSL4	ZNF561	SMO	NR4A1	SNX27	SPAG16
JCAD	C15orf41	SLC20A1	GPD2	LRRIQ1	ASPHD1	EVI2A	KIFC1
SH3KBP1	TUBGCP5	ABCC2	FAM83E	LHX2	ZNF486	SMAD6	NEK11
HAPLN3	DNAJB5	EFNB2	GDF7	BRD4	ZNF503	PLCG2	MAD2L1
SYT11	NOP9	MTHFD2	CCDC88C	FANCC	CEBPG	SLX4	C11orf54
LAGE3	C2orf72	TNK1	TNFAIP8L3	SLC36A1	CDCA3	NUSAP1	NR2F2
DPYSL5	FAM227B	FJX1	STARD6	QRICH2	PHKG1	DTWD2	BCL2L12
IL7R	DLG3	STYK1	PRRC2B	GPRC5A	TWNK	AMOT	B9D1
ADRA1B	LRP11	RAP2B	TMEM68	DZIP1L	SLC25A32	GLG1	NRK
MRPL14	SLC29A2	FLNC	MYO5A	ELAVL2	REM2	GIPC3	ALDH4A1
BICC1	ZNF891	SLC3A2	GAD1	SMARCD3	NGF	ANKRD30B	AIFM1
MAML3	AP4M1	CHST3	SLC12A2	PIK3CB	P2RY11	COL1A2	NUTM2B
LIMK2	SPRY3	PLA2G4C	OLFM2	PPP2R3A	FAM117A	ZNF618	HOMEZ
ARPC4	TBC1D8B	TSKU	EFNB2	ZNF470	PPP1R3C	SHTN1	AP1M2
RPS19BP1	MEGF8	PALD1	CEL	ARHGEF18	NNMT	CLASP2	HDAC6
SUSD1	AASS	MAPKBP1	ZNF672	PREPL	ALX1	DNAJC16	NEK6
RANGRF	PTPRE	JPH4	BRI3BP	DOT1L	EVI5L	CIP2A	EFEMP1
GALNT6	EPS8L2	AMZ1	DHRS7	SMC4	YJEFN3	ZNF221	FAM173A
CAVIN3	RRM2B	SCN3B	AC126755.2	ABCC9	LZTS3	NFKBID	PCED1B
ISG15	EDEM1	MCMDC2	GPRC5A	POLH	SLC25A25	EPB41L5	RGS9
RNF32	ARL17A	PTGFRN	GRHL1	ODF2	BHLHE41	MEIOC	KIZ
MXRA8	SDC3	SCG5	CNTNAP3C	PLXNB1	RASL10B	MAGI1	GATB
TUBB2B	DCBLD1	MORC4	XPR1	CTSV	APOLD1	ANP32E	KBTBD3
NKX2-6	NPR3	IRAK2	ADPRHL1	LIMS2	ARHGAP30	PHKB	FANCL
SLC35G2	RNF31	SLC7A7	GPHN	EPN2	VAMP2	KIF27	NUTM2A
APCDD1L	ALDH2	SPRY2	LIF	FBXW9	MRPS24	TMEM117	APLF
CHST7	KIAA1109	SLC49A3	MAPK6	AP1S3	XBP1	ALDH5A1	DNPH1
STOML1	LYPD6	TMEM64	FOXD3	ZNF780B	C5orf46	NECAB1	PAX8
DUSP10	PACSIN3	CNKSR1	NSD1	ATP9A	ACTRT3	PDGFD	CTXN1
FNDC10	SASH1	ST8SIA1	DERA	NEU3	PSPN	SOGA1	SH2B1
NDUFB2	AHDC1	TECTA	FERMT3	SLC1A4	NUTM2A	HLTF	IFT122
TWIST2	BCL2L2	ITPKC	CXCL5	PTAR1	SLIT3	DDX60L	ZNF358
ANK3	ACVR1C	SMAD7	NFATC3	KIF24	ANKRD1	FAM69A	MACROD1
TSPOAP1	PALM2	CAPN12	PLAC8	GOLGA6L9	OPN3	TXK	PEX11B
ARG2	ZBED8	PALM2-AKAP2	CISH	TNRC6C	TMEM52B	CCL2	FAM114A1
IQCD	GALNT1	EAF1	ABHD4	GALNT13	SRSF7	LRRC27	BMF
H1F0	TM9SF1	HOXA11	HES1	THSD1	TMEM184A	NFIB	C1orf54
POLE2	STRA6	PRKCD	KIAA1211	WIZ	NRARP	PPP1R3E	ASB9
NUTM2D	DNMBP	HIST1H2AE	ENTPD7	NPR2	PDGFRL	PAFAH2	DIAPH3
RPS12	ZC2HC1C	FEM1A	CARNS1	ICAM5	HIST1H2BG	ZNF594	FOXD4L1
POLR2L	SOS2	OR10A6	SASH1	FAM8A1	DNPH1	GKAP1	VWDE
MYL6	SLC12A2	RND1	DNAH1	MYPN	PTAFR	CDCA3	UBE2S
PDGFC	NETO2	ENO3	ELL2	SDR42E1	LPAR5	FBXL20	AKR1B1
DOCK4	VIPAS39	GABRR2	TAP1	PIANP	DPCD	NBR1	SLC2A12
WNT7B	TNFAIP8L3	EDNRA	CPNE8	LGALSL	PIK3IP1	MSI2	METTL7A
TP53I3	VPS13D	TBC1D3G	FOXE1	PHLDB3	CEP70	PAPPA	BAHCC1
AP1G2	IL6	DNAJB1	CGAS	MYC	BCKDHB	ABLIM3	RHBDL3
STYK1	ROBO1	BCL2L1	PAPPA2	CDKN2B	TCAP	ACAD10	ALDH3B1
CAPG	DMXL1	TREX2	OSBP2	FSTL1	ZNF121	SULT1B1	ACAD10
NBL1	HEATR5B	TFPI2	MFSD4B	ZNF615	EHHADH	ZNF362	TBC1D22A
DNER	DPF1	PITX1	C16orf87	FGFR1	LRRC7	PRKDC	CEP128
AZIN2	DENND4B	SH3TC1	TRIAP1	MGAT5B	ARL10	HDAC4	ZER1
FOXA1	MOV10	GPR68	GPRIN1	TBXA2R	LBX2	METAP1D	CNN1
AMZ1	SOS1	FZD9	CKB	ECT2	MACROD1	C2CD5	DDO
CDS1	PDP1	SLC27A5	CCNE2	PSTPIP2	CLDN15	SMIM14	NOX5
ATP13A2	STYK1	RGL1	SLC9A3R1	PRKCI	STAT5A	DENND1B	KRT7
FAM177A1	PGPEP1	DDIT3	BHLHE40	RPS6KB1	ADM5	SOS1	HECW1
SERINC2	XPC	LAPTM5	EID3	CCDC30	SPON1	HIBADH	SMC4
MANF	SLC5A3	FAM89A	PLXNB2	SSBP2	TAS1R3	ADAMTS12	TLCD2
INO80C	GIT2	PLEKHG3	HIVEP1	ZNF562	MAPK8IP2	ELOVL6	HYLS1
CHST2	DTWD1	TMC7	CHST11	INVS	TUBB1	TFAP2A	TLR2
PAGR1	TTC8	TRIM26	DPF1	ZNF627	ANKLE1	KIF13B	EFCAB11
CYP51A1	NUDT12	NPY1R	PCDHGB2	ZNF333	KIF26A	THAP8	GTF2IRD2B
PINK1	EPAS1	KCNS1	TNXB	OCRL	MROH6	EFHC1	FAM72A
UBTD1	CEP295	ARHGAP4	TBC1D2B	PROS1	TEX14	TEC	AMN1
USE1	CYP24A1	2022-03-11	AMOTL2	DAB2	LRTOMT	DPY19L2	SHC2
FGF2	ADPRH	KDM6B	ARHGEF11	ZNF91	ATF3	ADAMTS2	GABRA3
SCAND1	MACF1	COL10A1	TFEC	OSBPL1A	TBX2	GPNMB	VPS9D1
CDCP1	CDYL2	PCNA	WDFY2	KLHL9	ZNF428	HDAC6	OTOGL
PLGRKT	ARHGEF40	CT62	TCP11L1	DBF4B	MUC1	IPO9	CDKN2C
LRP10	CIC	TENM4	C11orf45	MRRF	CCDC85A	USP9Y	DNAJC28
TEX15	IRAK1BP1	ZFP36	KLHL21	BEND7	ITGA10	ZNF512B	SCLT1
PMVK	SZT2	OPRL1	ADPRH	FAS	TRPV1	FAM114A1	CUTA
ACOT2	BAZ2B	LBH	ANO7	ZNF791	APOM	ZRANB3	KIF18B
PDLIM3	HTR1D	PPP1R3C	CDCP1	PIP5K1C	SLFN11	BCKDHB	EVI2A
HAUS4	ZNF445	GPR75	TANC1	DNAJB4	WHRN	SLC26A2	KCNE5
PTGS2	RTKN	RTN4R	DAB2IP	SPARC	ITGB2	PPARA	EXPH5
PPT2	PCDHGA11	DYRK3	FAM131B	TUBE1	PLD6	ITGA4	ADAMTS10
STARD10	CCDC148	FZD1	MYO1D	SENP5	SNAI1	MAP2K5	PCSK4
LAMA5	SLC16A7	MPIG6B	MRPL49	RAB8A	SARDH	MYH10	DOP1B
G2E3	SYT11	OPRD1	DHRS13	TMEM168	AURKB	CEP97	HOXB9
ERH	SLC12A6	GPCPD1	2022-09-03	IKZF4	TRAPPC5	EXOC6	CBX7
SPSB2	PTPRK	SLC35E4	PCNA	PTPN3	TPM1	FMO4	TMEM132D
BIN1	SNX13	TRIAP1	FZD9	ACTBL2	RGS7	JPH2	TGIF2
DMAC1	ARAP3	TM4SF19	PVR	FBXL2	CNKSR1	SCLT1	LRBA
LTBP1	LRP2BP	IRS2	TNRC6C	TBX2	GPR89B	RFX5	REPIN1
METRN	ATL3	DNAH1	ABHD5	IRF5	FOXO4	TCF4	TCEA2
TBC1D10A	MARF1	MARVELD2	TLR4	ERI2	ZCCHC18	AHRR	TRMU
KLHDC2	TRIM5	ALOX5AP	RAG1	ZNF700	TIMM13	MCCC1	BDH2
HOMEZ	ARHGAP18	SRXN1	SOX18	PARP9	PDE6D	EDIL3	ARTN
AFAP1L1	NFKBID	C17orf49	PDZD4	ZCCHC7	ESAM	EPG5	FAM133A
ARHGAP5	AHNAK2	RFK	EMILIN1	ZNF85	LBH	PCDHGA6	ZC3H12D
CASP1	FBXL4	LSP1	PYGO1	SATB1	NPM2	EML6	CLSTN3
LIF	SLC48A1	FAM84B	AADAC	ADARB1	PPFIA3	CLCN6	SUCLG2
DSE	PPP1R12B	ABCA12	BICDL1	ZFP62	MAP1LC3B2	MILR1	MOV10L1
PAOX	FBXO27	CSRNP1	TMEM201	LIMCH1	PWWP2B	FOXO4	FAM218A
FZD9	ZNF335	LSMEM1	ZNFX1	STS	DPYD	TMTC2	NCAPD2
SERPINE2	LDAH	POLH	ITPKB	ALDH1B1	KCP	PCDHB10	FIG4
NEGR1	USP46	ESRRA	YRDC	RAB30	FAM72D	R3HDM1	CYB5RL
MGAT2	TTC28	CNNM4	EXO5	UAP1	MTFR2	KCNIP2	MIF4GD
RABGGTA	STRN3	ZNF488	ITPKA	MRTFB	NPDC1	FOCAD	FKBP11
OAF	FDXACB1	TINCR	BCL2	SH3YL1	HBEGF	USP44	ERCC6L
RCHY1	FAM221A	DUSP11	ATP2A2	SLC12A8	ACSF2	RIBC1	SLC26A4
EAPP	ODF2L	KIF17	C12orf45	PAQR8	CD14	PPP2R3A	ARL3
SCFD1	NF1	RBM38	WHRN	FAM120A	SDCBP2	LYRM7	OSCP1
IDH1	HUWE1	DUSP9	FP565260.3	INTS2	C18orf32	USP40	CCDC106
PGBD5	CEP290	CLDND2	CEP295NL	TSC1	RANGRF	FAM8A1	TSPAN2
CCDC96	GTF3C2	LHX6	ZNF37A	ZNF160	MYO5B	PC	KLF9
FRMD6	ZNF236	SOCS3	PPP4R3A	CYB561	ARRDC1	PCDHB14	MIS18BP1
JUP	ITGA4	NCR3LG1	PRELID2	AP3M1	TNFRSF1B	PIGN	HACD1
DYNLT3	TMEM132A	VPS37B	CYP11A1	APC2	MC1R	ATR	IAH1
BEST1	ZNF681	NEB	CD44	KLHDC10	CNN1	LCTL	PIMREG
TNFAIP8	TEC	UBE2Q2L	ZNF441	SLC7A11	MPP4	ZNF827	PHF19
SNRPA1	PSMA6	FZD5	SPATA7	CYFIP2	RSRP1	CLHC1	GPR137C
FAM3C	KAT14	SLC12A7	KMT2C	PCLO	CEACAM19	TTC30A	LIMK1
TCF7	AP5S1	PRAG1	ZNF275	PIK3R4	UBL5	NALCN	PRRT2
TSC22D1	CLCN3	DUOX1	IL1RAP	RAD18	C19orf70	PTPRS	HHLA3
STK32B	TIGD6	HRAS	CRYBG2	TIPARP	KBTBD8	PRC1	PJVK
NAMPT	KREMEN1	NOTCH1	TBX20	EIF4A2	USP6	TUT4	ANTXR1
SLC9A3R2	USP34	C16orf87	ZFPM1	CEP70	SLC30A1	RAB5B	MSMO1
PHLDA3	SLC16A13	STX1A	ZNF341	BCAT2	REEP1	ATG4C	DYNLT1
LAMB1	PPP1R3D	SLCO4A1	ZNF28	CSPG5	BCL6	ZNF521	COQ5
RUNX2	XPR1	GADD45B	CAMK1G	CEP152	JDP2	GCNT1	STX1B
CCDC28B	ALMS1	NNAT	TENT5C	ZNF83	TXNDC12	MYO18A	PURG
MUTYH	ETV6	NFKBIA	TET2	CDK5RAP2	CRYL1	IFNE	ROMO1
NOVA1	DCP1B	RALGDS	CSNK1G1	HYKK	C6orf52	ZNF500	L1CAM
RPA3	SCLY	CDC25A	SCNN1A	PSPN	ZNF670	ADD3	FN3K
LMCD1	PNPO	GPR156	FOXC2	DYNC2H1	IFI27L2	C8orf44	COL15A1
AMN1	ALG10	RIOK3	SOCS3	SYDE2	AURKA	CCDC113	PQLC3
SLC43A3	SRD5A3	WDR43	RGPD5	OLFM2	MAP2K3	AGFG2	SLITRK5
TWF2	FBN2	FOXD3	PCDHAC2	KCTD15	KAZALD1	CDKN1B	GBP4
NDUFA1	POLE2	ODC1	FAM208B	OR2W3	GPR160	TAF6L	MYOM1
RHOB	LNPEP	FOLR3	RORA	POU6F1	GRK5	TRIM58	COL5A1
SPAG7	SLC35E3	SPOCK2	CYP2S1	MTMR4	ZNF140	DENND5B	ITGA7
CENPB	LRBA	ROM1	SMURF1	GPD1L	ADM	ZNF395	SEMA6C
FAM20C	GBP5	SPHK1	C15orf39	BNC2	HEATR4	TFDP2	ACOT13
SQLE	HERC5	TBX20	HIP1R	BTAF1	NAPRT	PLEKHG2	LZTFL1
SRSF9	BCL9L	PPP1R3G	TMEM47	DNAJC13	KATNAL2	GRAMD4	MAGED1
FGFR1OP	ADSL	BTBD10	SMIM13	HOXB8	CAVIN3	ATRN	RBBP7
IGFBP7	ACIN1	LEAP2	GCSAM	GK5	CCDC74B	MGAT3	SLC50A1
PRMT5	TCIM	ARHGEF37	NOS1AP	DAB2IP	QTRT1	HSD17B1	CCDC107
MFSD3	CDC42BPB	ZNF703	ANKHD1	ZFC3H1	BIRC5	TLCD2	DECR1
FKBP1A	ZNF607	CDC42	SPRY2	PCDHB16	TTLL1	ECHDC2	QARS
SIPA1L2	TRAPPC6B	GCOM1	RAPGEF3	ZNF148	IQCK	CACNA2D1	BNC2
RGS20	SAMD9	TET3	DUSP10	MAST1	ARHGAP33	EFCAB7	CEP55
SNX6	P2RY6	CES2	ARHGAP20	LRRC6	WNT2B	RAB26	MISP
TMCC3	ZNF225	KCNC4	PNP	MAN2B2	SLC25A42	ADCK1	OSGEPL1
SNCA	HMSD	AL162231.1	MYB	DENND1A	QPCTL	MANEA	AAAS
MYL6B	BMPER	MEGF11	IKBIP	CDC14B	CDNF	DENND4A	GSTZ1
LTV1	OXA1L	COQ8A	RNF114	NIPSNAP3A	NTHL1	NUDT12	SYNGR1
PCOLCE	FOXN3	SPNS3	MAST3	PIK3CA	THEM4	CREB3L1	SKA2
PAK3	RAC2	SMTN	RFK	FOXF2	GDF9	NUCKS1	TXNDC12
ZNF688	SIPA1	ACRBP	PIP4P2	GRAMD1C	SLC50A1	CUL9	PLK4
PMAIP1	C3orf67	VPS37D	GIT1	PRKCA	PPP1R15A	ANK3	TRIP13
OXA1L	DOP1A	SRA1	CPEB4	ADAMTS6	SCX	NEIL3	MRC2
SLCO4A1	ADORA2B	KRT33B	PTGS1	GOLGA1	MIDN	FANCD2	RUFY1
B3GNT5	GPRASP2	CGAS	ZNRF3	USP13	CCDC28B	CDKL2	C4orf19
MSMO1	FZD3	HIST1H1E	RCC2	MYO5C	RGS11	DDX17	PABPN1
AMPD3	PUDP	ZNF468	EPHB1	POLQ	PROZ	SH3D21	TMEM91
RTRAF	ANKRD44	RSPH9	MYCL	PCYT1A	CTF1	CACNG7	ABI3BP
SDF2L1	ZYG11B	S100A2	VWA8	ZNF557	ERRFI1	LIPE	VAMP4
PAPSS1	MOCOS	TRIML2	ABHD15	NUDT16	EFEMP1	ARHGEF6	PLD1
CA13	HERC2	IL21R	BRSK2	NMT2	PPM1M	ERCC6L	KLHL22
FOXG1	ARHGAP24	FSCN2	KSR1	ZNF724	SLC25A23	KRTCAP2	POP5
PDCD5	NLRX1	CYP4F11	GLTPD2	CEP164	NRXN3	LRP2BP	MPV17
CHCHD7	PDS5B	RUSC2	LRRC8C	TRPM4	SAXO2	MTR	OCLN
ATP5S	CDC42BPA	YBX3	PHLPP1	ACADSB	KHDC4	LANCL1	GRAMD1C
RRAS	PIGV	TAP1	DUSP2	ARSJ	BUB1	ZSWIM1	THAP8
EBPL	PHF3	RBM14	CYYR1	SIX3	NNAT	NREP	SLC25A23
LAMA1	NCOA1	ASB5	FAM89A	ACAP2	CYGB	HOMEZ	LOXL1
CPEB2	ZSWIM5	TGFBR3	PRKG2	ZNF302	ADAP1	ZNF713	HOOK2
GNG4	GNPNAT1	TSPAN31	LNPEP	TBCCD1	EVI2A	SFI1	KYAT3
DMD	TCIRG1	CTGF	IL24	PRKAA2	CD320	UHRF1BP1	SAP30L
MED11	ZNF41	PALM2	ANKRD13B	BCAM	PIN1	BTN3A2	VPS45
OST4	NGFR	CLDN23	SLC1A5	MUM1	SHLD1	SMARCA1	TBC1D5
HMGCS1	RTTN	SLC34A3	ACTA2	KDM3A	H2AFJ	MYH14	CBX5
SNRPE	ZC3H10	CPEB4	PPIF	TUFT1	CRISPLD2	HPS3	OCEL1
MAFK	FNIP2	ELL	FUT1	STK4	C14orf39	TP53BP1	ARHGEF25
HIC1	SYNM	PTGER4	TMEM173	TCF3	PRELID3A	GTF2IRD1	BTBD2
IFIT1	ABRAXAS1	BLCAP	PITPNC1	GNAZ	ZMYND10	ZHX3	COLEC12
DCAF11	TLCD1	NRARP	CD55	DCLK2	ETHE1	EIF4G3	CCDC85C
PML	ZHX3	IFFO2	HIVEP2	MXI1	CCDC113	SLC18B1	KIFC2
ADORA2B	SHPK	ASGR1	USP2	MAP7D3	NEB	FAM117A	NREP
ARMC9	AMACR	GALNTL6	ACVR2B	ASTE1	CFAP97D1	ABI2	TMEM45A
CYTH1	EMP1	EPAS1	MAFF	ZNF426	NOG	CTNND1	ACTR1B
RNF152	PBDC1	CUBN	TRAM2	ZNF75A	AIF1L	EIF3C	CRISPLD1
TFPT	CYSRT1	CCND1	KLF13	SERTAD2	TUBB2A	SUGP2	PTGER2
ATRAID	LRRC45	IL11	CCDC8	ISCA1	CCDC40	SERAC1	CDKN1B
OLFML2A	FLNB	HSPB6	PRCD	GRIP1	VASN	SMAD9	KPTN
DPF3	HMGA1	MEX3B	KCTD11	TXNL4B	MAB21L1	MRC2	PAK3
MRPL36	HCFC1	NEDD9	JADE3	OTUD3	ARL6IP1	ARHGAP18	ATXN10
ZCWPW1	PHTF1	C2orf72	SLC35E4	PRKACA	NUTM2G	XRN1	VPS16
DOK1	DHFR2	APLN	ZNF667	SENP7	CYB561	FAM133A	MID1
NPAS2	ATG2A	CCDC38	GRIN3B	CYTH3	MYO7B	BTN3A3	KRT18
KIAA0391	KIAA1841	TNFAIP8L3	DISP2	NABP1	KCTD15	AGO1	EDIL3
IDI1	SLC9A7	SMIM13	KLF4	ZNF559	CCL28	TICRR	ATP5IF1
LTBP3	ANKRD18B	AKR1E2	ERO1B	PALM	MAFK	HIP1	PXK
FAU	EEA1	PRKG2	EFNA2	DDR2	MMP24	ZNF214	NYAP1
ADAM22	ZNF391	CEP170B	LCOR	GNB4	MFSD12	VPS41	SMIM14
WDR78	ITCH	BEND3	MYCT1	PIAS2	COL5A3	RNF157	RAPGEFL1
NFKBIE	MMD	GATA3	PIK3R3	DTX3L	EIF4A2	BCL9	H2AFJ
AJUBA	KATNAL1	LHX2	NOTCH3	LPAR1	CDKN3	RGS7	CENPI
DACT3	WDR27	TMEM52B	ANKH	FAM206A	C17orf49	PSG6	NECAB1
MRM1	ANKRD6	LTB	SLC41A1	ZNF773	DMTN	LRRC75A	LRP8
HOOK1	NAV1	CYP27B1	TMEM200A	MOB3A	TENM2	PMS1	SH3BP1
KCNK1	TINF2	CRABP2	DGKA	PIAS3	CDKL3	CEP192	DTYMK
SSR4	TMEM87B	KCNG2	GOLGA6L10	TBKBP1	RPL22L1	PDK2	IMPA2
SDHAF2	ZMYM6	ZNF469	AC010616.1	ZNF558	HSPB1	ZNF75D	NFE2L3
HINT1	ALG9	KRT32	DKK1	CNKSR2	P2RX7	PROS1	PIANP
LAT2	ZNF611	HIST1H2BG	PPFIBP1	ABL1	CFD	TCTN2	IL17RC
NIPAL4	NOS1AP	EDN2	SIMC1	CPA4	DUSP1	AP3S2	CORO7
HIVEP3	VSIG10	S100A3	ZNF551	KLHL24	CRB2	DMXL1	CCDC150
NDUFAF4	CC2D1B	KLF2	RBMS1	DIS3L	NTN4	NCAPG	LRSAM1
TMEM14B	SORBS1	ETV3	SLFNL1	PLD6	KAZN	2022-09-06	BEND7
PQBP1	LRRC8C	PRSS3	RCL1	COPG1	SLC31A2	FAM72A	RWDD2A
TSPAN6	ZNF638	NFKBIE	DOCK4	SIAH2	C1orf162	UBXN2B	BEX3
PEX6	AQP11	SLC35G2	ADCK2	ANKRD27	MFAP4	RHPN1	KIF7
C6orf48	ATG10	MRAS	DNMBP	ZNF510	TSPOAP1	DPYSL3	PLIN3
TMEM150A	SNCA	LEF1	VPS37B	BRCA1	TMEM40	BBS12	KCNT2
GCLM	SRGAP1	BATF3	AP1S3	CCDC40	PLEKHJ1	KPNA2	CACNG7
ZNF697	DAAM1	TJP3	JUN	C3orf58	MYEF2	TMEM94	FDFT1
TLE3	PLPP3	ZNF30	CDIP1	UBASH3B	PCSK4	ZNF627	ZNF627
CYP1B1	PRDM15	CBX4	KCNJ15	SERINC5	TBX19	AFG1L	FUZ
CDKN2AIPNL	PLCE1	SCARF1	TFPI2	UBQLN1	RNF122	CNTRL	FZD7
HS3ST3A1	CDKL1	USP18	RPP25	MSI2	NAALADL2	ALCAM	PTDSS2
TMEM219	WDR66	KIAA1324	KIF3B	ZBTB7A	LSM7	DNALI1	C4orf33
GNPNAT1	WDR91	WDFY2	SDC4	TAGLN	NEK10	DCAF6	IL31RA
MRPL15	PRKDC	RHOD	MESP1	KIAA1147	NCAM2	APBB2	PNMA2
SLC35F2	KDM5D	2022-03-03	SRRM3	ACBD4	FAM222A	AC005726.1	FYB1
F2R	PROCR	PROCR	SNRNP27	DNAJC27	XPA	CRYBG1	PCDHB10
GTF3C6	SLC22A3	PIP4P2	SAA2	CRISPLD2	DNAJC19	PHIP	REPS2
MYRF	WDFY3	VASN	TGFB3	LSM12	CCDC159	C7orf31	GGPS1
DACT1	PIK3CD	SGK1	SHROOM2	PSME3	CLP1	ZNF624	FOXM1
MIB2	ATP2B1	CDK5R1	SLC38A3	COMMD2	ZNF296	MBD5	SFI1
FBXO44	GMPR2	NETO1	GNAQ	DNM2	DNM1	LRP8	XYLT1
FOXD4	ZNF585B	CLN8	STARD9	FAM168A	ENDOV	CHD3	PNPLA6
COQ6	TINAGL1	ZNF503	PTPN13	WWC2	SNRPA	C1orf50	PPP1R1B
PRXL2A	FAM161B	ZNF34	ADAMTS7	TPM4	RASGRP1	KLHL24	BORCS6
CNPY4	CCDC142	TSPAN1	TSKU	SNX30	ANGPTL2	GIN1	DPCD
DTD2	HARS2	NKAIN1	DOP1A	ASF1B	DEF6	SUOX	PIGBOS1
HIST1H2BK	CES3	TGM1	SH2D5	RETREG1	SPX	EXOC6B	PPP1R9A
VEGFB	SLC26A6	DLX1	GREB1L	GMPS	MYOM3	VPS33A	GLRX
NDUFA12	DRP2	CAV1	PODXL	CEP78	ATP6V1E2	PIGZ	LENG8
SPINT1	PGM2L1	NQO1	RALGAPB	PCYOX1L	PCDHB10	PLCB4	HSCB
CASP8	ZNF691	TMEM159	RAB11FIP2	CD24	TEF	PHLDB1	KIF22
BTBD19	AAK1	AVPI1	SLC16A12	FAM155A	UBXN6	VPS13D	WDR97
TRMT112	APOBEC3C	IL7R	RNF138		EGFL7	EME1	TRIOBP
GBP2	TNRC6A	ZNF239	PTPN4		AMY2B	SYNRG	CHCHD1
SIGIRR	QPCT	TAS1R3	ZNF662		NANS	ARMCX4	RECK
UQCR10	GALE	AC007240.1	SIPA1L1		NFATC1	H6PD	C21orf58
CLN8	MYO18A	KCTD11	EFCAB10		EEFSEC	NDRG3	CRTC1
ZNF771	EMC10	TTYH2	AGO2		MTCP1	TECPR2	CERKL
ATAD3B	DOCK5	FOXD4L1	ZDHHC9		ALDOC	DOCK10	LAMB2
UQCC2	CRABP2	ANKRA2	NOTCH2NLA		POMT1	GLRB	ARMCX3
CCDC71L	TIRAP	TNFRSF11B	BMPR1B		CDCA7	RFX2	SGO1
RIN1	SLC35E2A	NOCT	BIK		UBAP1L	TACC3	SVBP
PRICKLE2	USP28	MRPL39	ITGAM		KIAA0513	PRKAA2	DNAJC19
TAF10	OPHN1	SCNN1A	SSBP3		BCAT2	GCNT2	LY6G5C
HIGD2A	ANKRD50	CALB2	SNRK		MKRN3	STK38	COA5
ASPHD2	HMCN1	SOX15	STAT3		MCCC1	CNTNAP1	ANXA6
TMTC1	ATP9A	CASP3	ARHGAP27		EIF1	SDCCAG8	TBC1D3D
SLC20A1	TCF4	GAREM1	LDLRAD3		NDUFS7	HUWE1	CAPS2
PGP	PMEPA1	SERPINA1	BCL2L11		CHCHD6	PTPRF	THOC6
MVP	CELSR3	CGB7	RRP12		TPM4	CDKN2C	TUBA1C
RELB	SCFD1	LRRC8C	GOLIM4		ZNF773	PCYOX1L	SMIM30
ADAM15	ZNF747	AC090360.1	LUZP1		URM1	UGGT1	TCEAL4
PIP4P1	SDCCAG8	TAF3	HIVEP3		PQLC3	RHOT1	FBXO16
CSRNP1	AP1G2	SEMA3B	FAM149A		LRRC6	GAB3	EBPL
ISCU	ADGRB2	RDH12	TIAF1		ENKUR	ABHD2	WFIKKN1
LPCAT4	LGR4	RRP12	SLC36A1		TSPAN15	NXPE3	SGSM2
ISOC1	NBEAL2	ZNRF3	FAM117B		FAM110A	FGD4	ELP4
PSMA7	DDB2	MROH6	NHLRC1		PHF19	ATG2B	KCNAB3
MAP2K3	TIGD2	MEI1	TMBIM1		TIGD3	ICA1L	GLRB
C1orf122	ANK1	SDCBP2	BAZ1A		PIANP	SIPA1	TMEM107
TPCN1	GGT1	MAP7D2	LRP3		LENG8	CEMIP	PACS2
SNRPG	TMEM79	CHIC2	PPM1L		ANK2	CLUAP1	TMEM38A
TMEM147	TBC1D19	RASGRP2	KDM6A		MPND	LINGO2	SAPCD2
PTPRK	IL11	PODNL1	TMEM121B		NEIL1	ZNF230	MEX3A
CYBA	SLC35E2B	RTL5	FOSB		RSPH4A	REC8	IQUB
NDUFAF3	ZNF668	INPP1	NRIP3		SNRPN	GABRA3	KRCC1
GPR3	CACNA2D1	NAMPT	MEX3B		RGCC	EVI5L	EPHA5
PTPRE	VPS13C	CLCA2	ZSCAN25		CCBE1	ITSN1	HASPIN
NUDT16L1	WNT7B	NFKBIZ	PANX1		SLC44A2	CCDC14	RPRD1A
PGLS	ZNF365	KIAA1586	TMEM164		NDUFB7	CHD6	ZNF554
PODNL1	NBPF14	ARL4C	TBXA2R		CD70	KIF7	BCAT1
ZNF608	MED13L	HAP1	SPAG1		ADAMTSL4	TRIM46	FAM229B
C1orf123	ZNF483	CCNK	ADRA1D		CPA4	ITGA1	NPDC1
ITGB5	ERAP1	EPB41L4B	SPINT1		NEK11	SSTR1	PPIL6
ACAA1	GTDC1	DLX3	ETNK1		ALDH1B1	ADAMTS10	UBXN11
APH1B	HPS4	CABYR	ZNF324		RHBDL1	METTL15	AFG1L
STRN3	CDS1	ANTXR2	PRRG1		FBLN7	MACF1	C1QTNF6
MAST4	ENPP1	KLF6	EI24		WFIKKN1	CELSR2	ZFC3H1
CENPX	PPCDC	GLP2R	KIRREL1		MMAB	POLQ	SLC45A1
MPC2	FMNL3	RPL26	PLEKHA8		GPNMB	ARNT	WIPI1
PSMA1	TAP2	TMEM68	NFKBIZ		SEMA6B	PHLDB2	SLC35D2
DDRGK1	FPGT	TSC22D3	RGPD8		CSTF3	RCN3	OSBPL5
ELK3	ATXN3	ETS2	NKX3-1		LSMEM1	PCDHGB7	PHYKPL
C3orf14	ADGRA3	B3GNT8	IER3		NADSYN1	ZNF438	CIT
RP2	TM7SF3	BYSL	CDK17		RHOBTB3	CCNF	HTATIP2
NIN	B4GAT1	B3GNT5	AADAT		P4HA1	RTL3	MTERF2
HS3ST3B1	OSBPL3	PRDM8	KL		HSD11B1L	ATP10D	TPM2
XRCC1	STARD13	SEMA3F	PLEC		RABEPK	KCNT2	C6orf132
IGFBP6	PLCG1	KSR1	PERP		COTL1	C4orf33	SLC29A2
PAQR5	WDR7	HTR7	DLG5		GTF2IRD2B	C2orf68	MND1
SMAD7	HAS2	SH3TC2	IVNS1ABP		CTXN1	COL5A2	ACBD4
ZNF620	ARHGAP26	ZNF600	NINJ1		CBX4	CCDC80	FAM167B
EMP3	ZDHHC20	MRNIP	CD33		NR1D1	DNAJB5	PPP2R3B
CAB39	ZNF32	WNT4	TLE3		MRPL4	LACTB	RASGRF2
LACC1	GLCCI1	PBX1	GSR		TUFT1	GTF3C2	UACA
SRP54	SLC29A1	C2orf88	AP4E1		HAS3	NBEAL2	MORN2
BAD	GSR	DLX2	INPP5F		PMAIP1	VAMP4	PGM1
IRF3	LIMK2	EFCAB10	CNTNAP3		NCR3LG1	LRRC37B	EML6
LRIG1	SRRD	PCDH9	TRANK1		ANXA3	KDM5D	SHCBP1
FIS1	PTPN12	ABHD5	FEZ1		GAS2L3	TMEM106B	C11orf74
ARL14EPL	FAM217B	PANX1	HS6ST1		SPACA9	SV2A	ALG8
TRIM6	TOGARAM1	NCEH1	UBR1		USP44	CCDC163	TTC31
POLR3K	ARFGEF1	INTS6L	GNAI1		LRRC23	FBLN7	KCTD17
ITM2C	PIP4K2A	SPINT1	JPH1		SLC16A6	SLC12A6	PRR16
HLA-A	IGF1R	TGS1	AKAP12		SLC7A11	ZYG11B	SLC12A5
AGA	PAPPA2	SH3BP5L	RPS27L		IL11RA	TMEM245	NAA38
ADGRE5	CFL2	SLC9A5	UCP2		MFSD14C	NUDT16	PGGHG
RTL5	MCAM	HS3ST3B1	ARL4C		CCDC74A	RNF170	CHD3
ARMCX2	CORO1A	EIF1	TIAM1		LRSAM1	NCAPD3	PIR
C1orf35	LPIN2	C15orf39	IGF1R		HES6	APLF	CIP2A
NFKBIZ	LGALS3	TSPAN14	TRAF1		CDCA8	CEP68	CD163L1
TP53I13	MOCS1	ADRA1D	ZFP36L1		VPS16	ADAM22	REEP6
HSD17B7	ZNF827	PIDD1	ELL		C20orf204	MNS1	GPR173
YIF1B	TNFRSF11A	ZNF596	RAB27B		CCDC85B	TBCK	TMEM14A
ATP6V0B	SFRP1	KRT81	SUCO		CORO7	NOSTRIN	CCDC40
TSPAN2	N6AMT1	INHBE	MAP3K21		ADAMTS1	HTR1D	CTF1
OCEL1	CCND3	GFAP	SETD7		C11orf49	TRRAP	ALOX5AP
HECTD1	RAD50	CXCL1	DEPDC7		DHX58	ARMCX2	DHRS4L2
HES1	EBI3	SLC8A2	DTX4		COL8A1	ARHGEF39	L3MBTL1
DTYMK	PRDM10	SAC3D1	TCF7		FBXL12	ZNF138	MYL9
LRRC75B	EPB41	CASP1	BMP2K		SNX32	C22orf46	CNRIP1
LRRC45	DOK4	CREB5	ANKRD18A		TROAP	ZNF385B	AGAP2
RGS14	SPG11	DIO1	MON2		TGIF2	PXDN	MRPS14
SYNJ2	DENND1B	PLIN2	CMIP		RPL26L1	FANCM	CCDC151
CCNA1	KIAA0391	HES6	DOT1L		DLX2	MKKS	CCDC115
NRG1	GXYLT1	ZNFX1	INA		FAM216A	FOXM1	EME1
MAFF	PRICKLE3	FAM131A	ZNRF2		ZNF586	DNAJC13	LAMTOR4
RRNAD1	SNX21	ISG15	IGFBP3		PKDCC	STK36	PTGFR
APEX1	PPP3CA	SMIM3	ITGA6		ADAM12	FAP	SLC41A2
GALK1	ZNF660	PLPP3	SPOPL		LRRC8E	DOCK6	DCAF11
TSR3	KIAA1671	C12orf45	STEAP2		ZCCHC24	LZTFL1	MVD
MBIP	GPD2	MMP25	TMPPE		FAM219A	STRADB	PTRHD1
PPIC	GPR180	CHAC1	VGLL4		GAA	ENTPD1	IFI27L2
CD151	EAPP	SLC1A5	SLC4A11		KIAA1614	SMAD3	CSAD
HLX	GFI1	ANG	ABCC4		AC010422.8	NAA40	ABCD4
MGST3	ZNF347	DHRS7	PNPO		LONP1	LRRC20	NIF3L1
SLC2A6	DDR1	PIK3R1	RIBC2		NIPSNAP1	SYNGAP1	ZSCAN16
LEMD3	HTT	KLHL35	GJA1		DHRS11	TMEM187	FSTL1
LPCAT2	LYST	C3orf58	MSI1		POLR3GL	KLHL22	ABCB8
IL15	HTR7	AMPD3	PAQR7		CAVIN1	CDC20	CLIP3
STK16	PPP2R3C	SMOX	MGAT5		PCED1A	NFASC	COL18A1
F11R	EMSY	FUCA1	MAMDC4		SORD	FZR1	NDUFA2
SERPINB8	PODXL	PANK1	SLC5A6		C7orf57	PDE5A	TMEM129
BRICD5	ZNF226	GPRIN3	TMTC3		SMYD3	ZNF76	VEGFB
FADS1	GREB1L	SOX9	PTPN14		HOXA11	TBC1D4	PMPCB
ZNF30	RAD54B	BTBD19	FAM43A		DCTN3	BRCA1	ATP5MC1
RASSF2	TGM1	AMIGO2	NLRX1		PMPCA	WIPI1	LSM5
TTC9	ZMYM1	TJP2	BCL10		NOP16	POLI	MIIP
TMEM102	MAVS	AVIL	IRX5		ZNF596	MFSD14C	ARL15
SLC26A6	PDZD2	RNF114	PPM1E		SLC3A2	PCBD2	DXO
SAMD14	PRKAR2B	MYLK2	PITPNM2		H1FX	DENND2A	NDUFB1
RASSF4	KHDRBS3	SRPX	TMEM97		ASIC1	ATG10	SLC35E2A
SARAF	FAM241B	MTFP1	ZNF695		NRBP2	CXADR	PDK2
CD58	ZMYM4	CHST11	PARP10		PSMG4	CACNG4	ARPIN
C14orf93	LARS2	SLC10A1	MANEAL		PAIP2B	KIZ	HAGH
RGS9	MRPL49	PTK2B	RCBTB1		B3GAT3	MTOR	PLEKHA4
UQCRC1	FMNL2	DDX21	TP73		PRLR	GIGYF2	MRPS24
ADAMTS3	CAMSAP2	KCNG1	FKBP5		ECSIT	FANCL	SHTN1
USF1	RFFL	SLC16A6	VSIG2		NDUFA11	PILRB	GALK1
PHEX	ZNF81	PPP4R3A	SLC28A3		RHD	CDC27	GTF2H5
PACSIN3	GLMN	IL20RB	DENND6B		DNASE2	CAMKMT	GLS
PPIF	EP400	ENPP2	RAVER2		PDLIM2	ADAM21	CISD1
FANCM	BTN3A2	NT5DC3	TIMM23B		FMN2	TTC23	C1orf56
SMAGP	TAPT1	TWNK	LDB3		DOCK6	MUM1	SPATC1L
P2RX4	OXCT1	RCL1	TULP3		KLC3	THADA	PLEKHJ1
METTL23	ARMCX2	NUPR1	TEAD1		KIF9	SAMHD1	LYG1
FBLIM1	KLHDC8B	MFSD4A	LHX4		ZER1	ERBB2	SLC25A43
SAC3D1	ZNF217	ZNF672	RASSF8		KLHL21	DYNC1H1	GPALPP1
ACAP3	RBBP8	PID1	HOXA10		RPL35	CRYGS	RAB13
FCHO1	CD109	BFSP1	C3orf58		SYNE4	ITGA11	SAP30
ADO	ARHGAP29	PLEK2	SLC4A4		CDKN2D	TAB1	COG4
ARHGAP18	ASCC3	SQLE	CSNK1A1		IER5	GPR85	OGFOD3
PTDSS2	H1F0	CD44	INPP1		RILPL1	C6orf89	ZBTB3
C7orf26	TMEM30A	IER2	FAM104A		GCDH	WDSUB1	MTRF1
SAV1	DYNC2H1	PML	RELT		ATP5MC1	ZMYM4	ZNF784
DNAJB2	ATG4A	RNF138	RASEF		SPATA13	ARHGEF9	SPEG
SNN	ADGRG6	TUBB2A	CXCL2		FHDC1	CCDC125	STX4
NET1	DERA	HSPA5	HELZ2		SLC29A4	CDK14	IFT57
TSSC4	ZNF235	TAF13	CEP164		SLC2A12	ACBD4	ETFB
ARHGAP45	STRN	MAP1LC3B2	RASAL2		MRPL54	LMBRD2	CKS1B
TIGD5	ARHGAP32	DHDH	NR1D1		RETREG1	ANKRD52	SDR39U1
MRPL34	PDGFC	GLYATL1	MTA2		AK4	TSC2	MEGF6
NLRP1	ZNF512B	KCNK7	C1orf74		ATP6V1C2	CEP152	STXBP4
ANXA6	EPS15	CGB8	FAM129A		FAM83D	GALC	KATNAL2
MARS2	LDLRAP1	PIM3	NR4A3		NOCT	PPIL2	HEXIM2
IL32	EXTL3	LAMC2	TNFRSF11A		NTNG1	ABCA7	HSD17B4
NACAD	USP48	MYH3	STK32B		TSPO	SNX30	MITD1
FUT8	CCDC71L	FOXD1	ZNF219		INPP5J	CCDC77	ANP32A
PID1	NAA40	KHDRBS3	ATP8B1		LRRC20	XPNPEP3	MMP7
TMED9	LRCH2	TPH1	TXNL4B		ANAPC15	PDE4DIP	RCCD1
MAP4K5	CHD4	SERINC5	ARFGEF2		SERTAD1	MIA3	SLC9A3
TCEA2	CRYBG1	ZNF28	AOC3		SAMD12	COPG2	ZHX2
E2F5	PTPRM	NATD1	DMRTA1		IRF1	R3HDM2	RPUSD3
PARK7	BCL2	GXYLT1	EEA1		MYL12A	CPNE3	SRPX2
ZNF581	TRIM2	RCC2	MEGF9		RFC4	MAGEC1	CDC26
TMEM9	MYO6	ARRDC2	PRRG4		HPS1	ZNF480	IDI1
ZNF853	CSF1R	KRTAP2-3	TTC4		LRRC73	PBX2	FBXL15
PRXL2B	ABCC3	RAMP1	MAP3K9		CCDC107	APBB1IP	ZNF395
SLC11A2	IL7	INKA1	USP15		STK32C	SGO1	CGNL1
ANXA3	ZKSCAN7	CISH	LACC1		KRT10	NCAPG2	MFSD14C
SDC3	PSME2	BAG1	PLK2		HEXIM1	RAB3B	NLRC5
ECI2	GLCE	RIPOR3	IQCJ-SCHIP1		CFB	IFT74	IL11RA
TRAF4	SAV1	KLF13	CYR61		FZD7	NAPEPLD	MPI
PNMA1	TSPYL5	C6orf48	ARHGAP21		PXYLP1	SYT1	FKBP3
ZNF354A	MBD5	MOCOS	CHRNA5		MSL2	CCDC39	RSBN1
ZBTB12	ZNF300	CFB	ADIPOR1		CYB5A	ZNF599	SERPINB6
MLKL	ZNF70	ELAVL2	METRNL		ABCC9	GPR137C	WDR60
HTRA2	PLEK2	ABHD4	KLHL8		RHBDL2	AURKB	SLC38A6
SNX21	KANSL3	DNAH10	LPAR1		KPNA2	TOM1L2	ELP5
COQ5	ABHD4	GPX3	ZNF746		ABCA3	ZSCAN20	SPEF2
HCFC1R1	CASD1	IL2RB	ARHGEF3		SPARC	ATP9A	TCTE3
SEPHS2	ZNF571	NRP2	DMRTA2		B9D1	TTLL5	TCEAL1
ZNF517	KANTR	AADAC	OPHN1		BCL2L12	PTPRM	ARHGEF39
ARL6IP6	PLXNB3	ZFP36L1	EGLN3		FAM72B	PER3	CCDC77
NUDT11	TCOF1	PROCA1	TLE4		ZSCAN5A	CEP290	CXADR
LRRCC1	EDEM3	CHRNA5	USP53		BTBD2	C18orf54	BABAM1
SLC2A4RG	PKD2	FOXA1	USP4		NFKB1	SMC1A	LPCAT2
FKBP1C	PHKA1	TOR4A	KCNK1		FAM107B	DPY19L3	NOVA2
ING5	RPS6KA6	GPAT3	ICOSLG		NR1H3	PKD2	TPGS1
NOP9	MRTFB	ADRM1	ST3GAL4		HSCB	GMPR	CCDC80
RNF25	RASAL2	DSC3	FOXF2		PIM1	PIK3C2B	FYCO1
DGCR6L	GABRA3	NGF	RABGGTA		TMC6	SEMA6C	MUS81
FZD8	RCOR2	CCNE2	IRF5		ATP5IF1	PACS2	GLT8D1
MAP4K2	JADE2	ZNF697	CASP1		EFNA3	PLEKHO1	ACOT8
KHNYN	PAGR1	NME2	TOP3A		ZFC3H1	GPR155	CNIH3
KCNK2	PATJ	KRT17	RIPPLY3		CPED1	C11orf54	OSBPL7
NETO2	TIMM21	TTC23L	SHANK3		FAM69B	PI4KA	MEST
CD63	KIAA2026	CCND3	CMTM4		CD83	SYT11	OGDH
CDC42EP4	ARVCF	GNRH2	TNFRSF11B		ZC3H12B	OBSL1	NCAM2
SNAI1	MDM1	SDC1	ZNF699		SMIM4	AATK	PDK4
PNKD	EPB41L1	GPR143	TMEM92		GALR2	ZNF609	GPR39
CSTB	ZNF517	PPM1M	NQO1		TICAM1	ANKS1A	NPIPB15
ERO1A	TMED8	CSGALNACT2	SERPINE2		PPAN	PECR	KIF15
RFTN1	ZNF613	TACR2	FBXO45		TRA2B	SSBP2	CHRNB1
CLP1	CBLB	BRMS1L	MPP6		INF2	LRRC6	GCA
TMEM70	SYNE2	USP53	CORO1A		CA14	KDM4D	CHCHD5
ERP29	PPP1R12A	ZNF746	APLP1		MAGI2	2022-03-01	EIF2B1
CEP19	EPB41L3	BCL10	MID2		SHB	TARBP1	RHBDL1
TRIM39	PSMB9	NR2C2AP	UPP1		MAFA	MAML2	OXTR
MRPS21	C14orf28	CFAP53	FAM91A1		TFB2M	USP24	DHTKD1
TGFBR3	ADCK2	ZNF385A	SPIN4		ZNF597	EPB41L2	GPRC5B
AKR1A1	ANKAR	ACTA2	GNL3L		TLE2	FAM102B	HIST1H4H
WTAP	CEP57L1	CCDC88B	MXD1		PCDHB11	DCAF5	IRAK3
IRF7	ZCCHC2	TLE1	ANXA8		ISCA1	ZFP3	MKI67
CRYBG1	PHIP	HSPA4L	ZNF473		ARHGAP31	ROBO1	PPA2
HYAL2	KRR1	DEPDC7	SYNJ1		FAM84B	XRCC1	TUBB2B
IDS	MAP3K4	ST3GAL4	ZNF774		COCH	FAM72C	ALCAM
EPM2A	ZNF793	IL33	ARRDC2		NOL8	ARL6IP5	CLIC6
KIFC2	ZFAT	FBXO22	KBTBD7		MAP3K15	STXBP5	SSTR1
KIAA1217	S100A16	PLXNB3	HOMER2		ZFP36L2	RPH3AL	TTF2
ERN1	UNC13D	ARVCF	CAMSAP1		PFDN6	FUK	CRY1
JPT1	STIM2	VKORC1	CASC10		TTC32	GABBR1	LAMA3
NKX6-1	DYNC1H1	KIF21B	FZD3		SLC9A9	CEP57L1	PC
FKBP10	UTP20	KLF10	MTO1		IQGAP3	ZBED8	PIN1
RILPL2	TBC1D7	KLF11	CERS2		DDX39A	ZNF404	SSC5D
EIF2S1	SNX27	TMBIM1	CREB3L2		PER2	FAM173B	NDRG3
	TMEM158	RSPH4A	CSNK1E		RBM15	AHCYL2	C17orf100
	PAQR3	SIX1	CDT1		NAT14	ZNF589	SPTAN1
	HDAC7	TRIM11	WDR47		TMEM242	SH3PXD2B	SYT11
	TOX2	TNFRSF1B	S1PR3		IGIP	PCLO	H2AFX
	ANKRD28	ZNF622	GDAP1		SARM1	ZNF117	POLR2J3
	MTM1	NUDT11	ARHGEF26		FSCN2	LRRC37A2	RRAS
	SOCS5	MYLIP	BAIAP2L1		IRX5	NMNAT1	ZBTB12
	LRP12	GPC1	ADCY1		PSMD5	BBS2	MVB12A
	WDR63	KRT10	MICAL2		CDHR2	ATP6AP1L	PRKD1
	DNER	BAG3	CCIN		HSF4	GLIS3	DHRS11
	PAPLN	COL17A1	ZFHX3		DIRAS1	FAM86C1	NCAPG
	RPAP1	PRSS36	CXCL8		CACFD1	BDH2	BRD8
	KNOP1	RPP21	PKIA		EIF3G	CLCN3	FAM216A
	CEP192	SLC41A1	RBPMS2		SRXN1	TMCO4	TMEM175
	CCRL2	KBTBD7	BTG3		E2F2	CKAP2	ZMYM3
	IDS	FRS2	SH3BP5L		ERCC2	GNS	SHISAL1
	MIGA1	ZNF275	ZNF296		APOBEC3G	EXD2	ASIC1
	GBF1	ZNF425	IDH3A		ZHX2	ZNF382	COL16A1
	PRKAA2	ZNF408	B4GALNT1		TRIR	REEP1	BBOF1
	AC010616.1	TRIM47	VPS13C		TRAPPC6A	VPS52	FAP
	JAG2	SEMA4A	ZNF816		C20orf96	SLC25A23	ALDH2
	LEPR	PDE3A	STK4		ZNF367	KLHL36	BST1
	POLR3B	FAM208B	PSME4		VPS35L	NRXN3	ZC3H12B
	CEP76	TFB2M	MOB3B		C16orf91	ZDHHC2	RPGRIP1L
	SPTBN2	IL7	NETO2		ACYP1	GALM	HIGD2A
	MTHFD2L	XBP1	ZDHHC5		NME7	AKAP13	NR1H3
	TARS2	DCLRE1B	PAQR3		RNF39	MED7	ARL4A
	SH3D19	CLDN4	POLR1A		LAT2	TMEM56	RABAC1
	RANBP6	MAFK	GALE		METTL3	TMEM8B	SLC38A10
	TUT4	MMP14	PAK1		MPLKIP	COG5	NUSAP1
	APC	SYNE4	CASP3		BST1	HSD17B11	SLC35F3
	ITSN1	SLC31A2	NUP58		C3orf58	FSTL1	TSPAN19
	BICRA	ZNF324	ETV3		CTSV	IRAK1BP1	CASP9
	ZNF182	IRF5	CD24		JUN	SLC38A7	ARFRP1
	SHROOM3	SYNPO	RIPOR3		RNF44	NXF3	GABARAPL1
	SMARCAL1	ATG101	BRMS1L		ILVBL	ALG10	ARSG
	PDLIM4	FEM1B	ZNF677		ELOF1	STRBP	COMMD4
	ATP11A	PLEKHG1	NECTIN3		PFKFB3	PRDM5	TRIM69
	MTOR	MAPK6	ARID3B		TCF3	RGP1	TLX2
	JCAD	TXNL4B	DCUN1D3		VWA7	SGSM2	GPR162
	DSN1	ADSSL1	MINK1		TMEM243	CPD	SNX17
	SFR1	ETNK1	ACSL1		FSTL1	MATN2	RNF5
	RAG1	TMEM158	ZNF324B		CCDC62	NIPAL2	ASAP3
	ATP6V1D	TLR3	MYO6		ZDHHC1	TPR	PLEKHO1
	STAT2	CHST7	ALDH1L2		FSTL3	CDC14B	CNPY2
	NUMB	SHB	MOB1B		TMEM259	PNPLA6	HDAC4
	POLM	FRMD8	TNRC18		DEPDC1	VPS50	ARHGAP33
	CTBS	CDKN2B	ACAP1		ATP5F1D	IQSEC2	ACTG2
	CCDC117	FRMD6	ITPR3		FAM83G	TAF8	TTLL11
	SECISBP2L	PARD6G	PIK3R1		EBF4	FANK1	NCAPG2
	DCP2	IFNGR1	FAXC		VKORC1	ERCC2	RALGAPA2
	ZNF526	PTPRU	UCK2		TMOD1	ARL6	TMEM126B
	LAMC1	RCAN1	RIN1		RNF126	FIG4	EIF2D
	IPO8	PLPP4	ZNF311		PYCR1	ZNF613	LANCL1
	ZNF532	UBASH3B	ORAI1		ALG14	GREB1L	BRIP1
	RAI14	EPHB1	HRAS		TIMM44	PCDHB16	PARP4
	ATP5S	ASS1	NBPF10		TMEM44	INTS9	EXTL2
	ARHGEF19	HIST1H4I	PPP1R13B		OAZ1	ZNF607	KLHL24
	KIF3A	DENND2C	MGA		SLC25A36	TARS2	BBIP1
	AGO1	FGD6	TUT7		UBE2S	ZNF556	MKKS
	FKBPL	APOBEC3C	ZNF583		NTN3	HOXC6	YIPF5
	FNDC10	CEMIP2	DDIT4		ALPK1	NEK6	PPM1M
	PLCG2	BRPF1	RAB1A		GPSM1	SPACA9	CDK5
	KLF12	IKBIP	TGS1		COPZ2	TTF2	MEIS3
	ZNF813	GRPEL1	TEAD3		CCDC88C	NDC1	DDX17
	PSME1	TSPAN10	KCNQ5		IDI1	SMARCAL1	LDOC1
	COBLL1	KDSR	SLC46A1		AP000944.2	TCAF1	SLC2A6
	FAM120C	DRAM1	STRADA		CCDC85C	ABHD6	RILPL2
	NOTCH2	MYC	TRIB3		LUC7L3	SFXN2	CYTH2
	HPSE	MFHAS1	RUBCN		NFE4	B3GNT10	CYB561A3
	TTLL4	GFOD1	CEP250		VEPH1	OLFML2B	DCAF6
	DGLUCY	ABL2	FCHO2		INKA1	ATF2	PROS1
	SLC35F5	CYP2S1	IL7		PRDX2	TECPR1	TRIM62
	MCM3AP	AK1	BTBD19		LYPD3	IQCK	FAM234A
	PUS7L	C1orf162	INPP5A		AP2M1	PAM	ENPP2
	RAD17	SIPA1L2	BMP4		BHLHE40	WDR5B	SLC29A4
	OAS3	COX8A	SEC61A1		KIF2C	SLC9A7	SOX12
	ZNF618	DMRTA2	FOXA1		ZBTB5	SARS2	CDK1
	C13orf46	UCK2	RCOR1		SPAG7	DEXI	SMIM19
	BAZ1A	EFNA1	DHX34		NDUFB5	FTO	KDM4D
	EHBP1	PDRG1	LMTK2		ISL2	UMAD1	SORD
	MAST2	ZNF367	CHD9		ARHGEF6	ZSCAN16	PPP1R16A
	YAP1	TTC4	NXPH2		PSAT1	TMLHE	SLC4A8
	MBTPS2	GNG10	MERTK		DCAKD	UBE4B	PRC1
	TMEM135	FOXF2	IGFBP4		PCBD1	SPRED3	C19orf70
	YPEL3	CDK17	SLC26A1		NME2	HLCS	COPG2
	FBXL19	BTG3	COL27A1		CDK5R1	BTN3A1	LMF1
	SAMD9L	SOCS4	ISG20L2		RPS15	TTC12	ERMAP
	HS2ST1	MTA2	VPS37D		LAYN	DDHD1	TOM1L2
	RDH11	LRRC66	GCOM1		ADAM21	TUB	USP44
	EML2	DUSP8	TRIM3		SDHAF4	FBXL2	PPARA
	DNAJC27	ZNF451	DPYSL5		HES4	HOOK1	ADAM8
	IGF2R	COL27A1	VLDLR		MYCL	ABRAXAS1	C1orf123
	AMMECR1	DNAH17	CSF1R		DYNLT1	ITPR2	C5orf34
	BRI3BP	CSNK1G1	PDE4D		FIG4	NCOA6	TMOD1
	VASH1	ACTRT3	PLXNC1		S1PR3	ERBIN	PRKCA
	IFIT3	MAK16	SLC23A2		FOSL1	PAPLN	TCEAL3
	SEMA3D	TRIM8	CD82		SRSF3	RAB9B	CPA4
	FAM172A	ODF3B	KAT2B		MAST1	CEP55	STYXL1
	SRBD1	RP9	YEATS2		SLC39A13	WDFY3	CCNA1
	CENPI	PERP	TLE1		DHCR7	AXL	EXD3
	CAD	USPL1	SGMS1		CUTA	CD109	PHKB
	FRYL	HIVEP2	GNB4		PARL	VASH2	DPP4
	SLCO3A1	TIMM23B	SPRYD3		SPTB	MUT	SNAPC5
	DSE	SLC10A3	ANKRD18B		LHX3	USP34	SPACA9
	ZSCAN20	DNAJB9	TRIM32		POLD1	DRC3	LARP6
	SNCG	MCL1	MAP3K3		TMA7	MICU3	LUC7L3
	PQLC2	NAGS	KRR1		YPEL1	TLN1	UFSP2
	PXN	TSC22D1	ASAH2		MRPS14	RNF214	IKBKE
	FAM20B	EPS8L2	PHTF2		ICAM1	NME5	WDR13
	ZNF528	ASCC3	MMP14		STK11	TCEANC2	TTC32
	ARID2	RAB27B	MRPL39		APBB1IP	PDK1	IFIT2
	GSAP	ZFAND2A	SPRED2		ADRA1B	ATP11A	ANK3
	MYO1B	ISL2	PSD4		SH3GLB2	CLIP4	RAB24
	ETNK2	HRCT1	TRAF3IP2		TIGAR	BDH1	FLOT1
	POU2F1	ADAMTS5	TLCD1		ZNF275	ADAM12	FKBP7
	DGCR8	CTHRC1	SLC29A1		BICDL1	RAD17	PNPLA4
	MAP9	RASEF	PFKFB3		GPR155	RBM43	SIRT5
	TSPAN5	IQCJ-SCHIP1	KBTBD6		ARHGDIB	BTN2A2	ZNF251
	PRAG1	FAM222A	CASK		ZNF317	PKN3	ZNF428
	NEK4	PELI1	GAN		SLC28A3	BBOF1	IFT74
	EPB41L5	ADAP1	ZSWIM6		MAP1LC3B	RWDD2A	ZSCAN30
	CLK2	TMEM151A	TDG		SPTBN5	SLC41A2	MED11
	ADAT1	BCL9L	WNT5A		ADAMTS2	MAP9	GLB1L
	MGAT5	GNMT	NEDD9		RPL35A	FMO5	FBXO10
	METTL27	HK2	HIC1		CACTIN	PIAS3	GSTK1
	ZNRF2	RIN1	SLC25A30		CARS	PLK4	MSRB3
	MMACHC	CGRRF1	CTDSPL		MAPK13	DNAH11	PHF23
	GLYATL2	P2RY11	ADGRL2		GGACT	CENPC	LIMD2
	ARID4A	ZNF667	PPP1R3G		ARV1	C19orf66	SYCP2L
	DIAPH2	DPF1	SARS		DHRS7B	ERMP1	TIMELESS
	TNIP1	BAX	SYNE2		COX8A	COG4	CCDC88B
	FAM13A	CEP85L	PPP2CB		PNPLA7	RABGAP1L	TRIM6
	GPATCH11	GFPT2	SIX1		DNAH17	KIAA0100	SEMA6B
	MIS18BP1	GCSAM	RDH10		APC2	SEMA5A	ZNF771
	MYH10	AMOTL1	TRIM24		FAM228B	SYNJ2BP	NUDT16L1
	SLC25A45	HIPK3	TP53BP2		DCXR	FBXO36	DNASE1L1
	CCDC90B	NPR3	AKAP9		GSTZ1	DLX4	MAP3K7CL
	TAF6L	HS6ST1	PDE7A		MED27	BBS10	ZDHHC1
	MAN2A1	PRKX	PUS3		DPM2	ORAI2	TRIM16L
	PRMT5	HNRNPAB	PHGDH		CITED2	FAM189B	GLYCTK
	DENND3	RARA	FUT4		GRHPR	DOCK9	GPSM3
	ARHGAP42	SMURF1	FLT1		SVEP1	ARID5B	THBS3
	ZFHX2	MIDN	FAM102A		RGS5	COQ9	PTPA
	PRRG4	ISPD	LRIG3		CRY1	AASDH	VKORC1
	FHOD1	PDE4D	EML2		CCNG2	TRPS1	ARMCX2
	TCEANC2	NANOS1	PDLIM3		GALNT16	GALNT7	FBXO9
	SMCHD1	MAP3K21	UPF1		ZFPM1	RTKN	CFAP69
	IRF2	GPS2	DNAJC5		PDE1C	NPAS4	CHURC1
	IFFO1	MARS2	CTBP2		CCDC191	BTBD9	CRYGS
	CYTH1	NOP16	SEMA4D		IRF5	TMEM184A	PRMT2
	AP4S1	LUZP1	PRICKLE2		SOCS1	UBR4	SNAPIN
	FMR1	MAFG	TXLNA		ZNF469	ERCC6	FAHD2B
	ADCY9	TLNRD1	RBM18		EIF4A1	SRPX2	COL5A2
	GPR85	TWF2	DHX33		ZNF57	ABHD18	PCSK1N
	AGO4	ADM2	FMR1		RRAD	KAT6B	HID1
	KMT2D	FAM102A	CBX2		PRR22	DYNC2LI1	GALT
	MITF	RNF32	CBLB		ZNF627	DTNB	SLC35B3
	MDN1	ETV2	WNK1		DCAF4	DMD	PSMB10
	INTS8	CSNK1E	SRGAP2B		AMZ1	ARSG	SPIN2B
	KLHDC2	LYAR	TMEM209		QRFP	NLRC5	SPPL2B
	UFL1	NFKBIB	OSBPL6		KIAA0556	CDKN3	APOL1
	SPAST	HOXA10	SLC22A15		ZNF442	TTC37	PMF1
	FAM13B	KLHL15	DDX21		CEP112	MTBP	GCDH
	PIK3R3	WDR74	DLX1		HLA-F	TRAPPC11	PAX6
	GEMIN2	RAB1A	DSG2		EFCAB11	LIG3	CAB39L
	KIF13A	ITPRIPL2	BYSL		DCAF15	TRHDE	PPP2R5C
	MPP5	ACBD3	CARMIL1		HAP1	CHST12	ATF6B
	NECTIN3	HSPA1L	UHRF2		CDK20	SAMD11	C5orf46
	DLL3	LCP1	B3GNT5		NUF2	MBTPS2	PTMS
	PGBD1	TRAPPC5	ARFGEF3		KLHL3	TRIM69	MYL6B
	ZNF22	KBTBD6	MAK16		UQCC3	RECQL5	TSR3
	LHX1	FAM241B	EHD1		DIDO1	KAT14	MAP2K5
	MFSD4B	ANXA8L1	IER5		TIMM29	ARHGAP32	ST3GAL3
	EFR3A	CLU	WDR91		HERPUD1	BICC1	ALPK2
	KCNK2	NKX2-4	STC1		PIGZ	MTHFR	HPF1
	FERMT2	RAP1GAP	EFCAB13		TRAIP	ACACA	DPYSL3
	ABCB10	ABCB9	NSMF		CORO2B	MRE11	ELOVL6
	APPL2	PPP2CB	MFHAS1		TSNARE1	PCYT2	AKR1C3
	PARP12	CLCF1	RBM12B		TMEM141	CPA3	KBTBD11
	C6orf47	SLC25A22	CPE		DNAJB11	WASHC2C	CLIP4
	PORCN	DNAJB2	DIP2C		LMNB2	SPTBN2	MAP7D3
	ATG16L2	MED26	PDE8A		BAHCC1	CABIN1	HCFC1R1
	ARHGEF12	BAMBI	KLF6		TUBE1	FKTN	MORN4
	CCDC71	CKB	OGFOD1		CDC42EP1	ZFC3H1	TTC8
	ZNF43	WWP1	ANKRD6		C19orf66	ALDH3B1	UQCR10
	CHMP4C	TCF7	SNX15		TDRKH	CCDC138	CRYBG1
	TRRAP	HMGA2	TRPC3		FAM118A	PRUNE1	NUBPL
	TGFBR3	ANKRD13B	SCML2		SRSF5	ZC3H10	CCDC30
	PHF8	EFHD1	MEF2A		LMO4	TBL1XR1	RSPH3
	FNDC3A	TGFBRAP1	SHROOM3		RHPN1	TIA1	GALNT10
	PTPN14	FUT4	MTX3		HMGB2	IGF2BP3	DPY19L2
	POLK	FAM110A	SLC35G2		BCAS3	NCKAP5L	ORAI2
	MUTYH	AHNAK2	SOBP		SSTR1	ANKRD44	CCDC169
	PLXNB2	RRN3	BAX		ZFYVE27	ZFAT	IRF3
	XRRA1	ZNF219	SCD5		SPOCD1	KDM4C	WDR31
	ENPP4	SH2B3	RPS6KA1		PRRX2	WDPCP	TRAPPC6A
	DMAP1	PODXL	HAP1		DGKI	TTC31	CNTROB
	GTF3C3	SLC25A33	ELOVL7		C5	METTL4	RECQL5
	APOOL	AP000944.2	TKT		PCDHB12	MPHOSPH9	ACADS
	RPGR	C11orf45	ZNF841		RPL27	AGER	PPP3CB
	ZNF417	ZNF792	LIFR		PCED1B	NTNG1	VPS35L
	RRBP1	URB1	SLC25A25		RGS3	TOP2B	ARHGDIB
	KIF13B	NIFK	ARL8B		POLR1E	OMA1	MCRS1
	CTC1	UBL5	C18orf25		PRR11	NCOA1	PNRC1
	MYO9A	BAIAP3	DCLRE1B		ABHD17A	ARHGAP24	SLC16A2
	TRAPPC8	BCOR	GLYATL1		RPL36	TBC1D31	RTL8C
	CCDC88A	MYB	CCP110		ZNF703	NACAD	PLGRKT
	GOLGA8A	BRD2	ZNF488		C17orf51	HMBOX1	DHRS4
	AGGF1	ARHGEF3	TSC22D1		GTF3C4	MPST	REEP5
	TBC1D10B	FERMT3	MIER2		ACTR3B	EHHADH	BBS12
	KLHL5	IRX3	ZC3H12C		MEIOC	SKAP2	CSPG5
	RAD51D	FAT1	PI4K2A		TUBB4B	ALOX12	XRCC4
	FBXO46	SRSF7	AUTS2		SURF6	SPATA5	CETN3
	ZNF234	GARS	STK24		PEMT	VPS54	GPX3
	MSH3	RPS29	GABPB2		CYS1	MEIS2	MOXD1
	DICER1	MCIDAS	GARS		CSRNP1	LAMA1	CKAP2
	ABHD10	KAZALD1	MICB		ARPC5L	PCIF1	DBN1
	ZNF775	ZNF561	F2R		LEF1	TTLL7	CCDC163
	PCNX1	SOX18	AVPI1		STS	LSS	COL1A1
	FURIN	ZNF202	TMEM185B		PER1	RSPH3	JDP2
	NEDD4	POLR2H	THAP6		EGR2	CREB1	KDM5B
	HOMEZ	PCDH18	LCAT		PAQR9	TRO	MXD4
	ZNF248	PHYHIP	NACC2		SNAPC1	TFPI	DTNA
	CEP131	SPX	NR4A1		WNT5B	UGGT2	FAM45A
	C3orf14	NDUFAF4	FAM98C		DMPK	ZNF652	CCDC61
	QRSL1	POLR3D	BTG1		FAM72A	ARSD	CLTCL1
	TRIM33	SHROOM2	L3MBTL3		SYNGR1	PIANP	USP5
	JAK2	NAB2	SLC12A4		SLC25A10	TMEM53	GSTM3
	RFC5	RGS3	CLDN4		C4orf3	MYO9A	TXNRD2
	OTUD7B	GTPBP4	NEMP2		SAP30	SLC30A6	AMPD2
	RAPGEF2	BCL2	KDM4B		PRPF40B	ARHGAP19	ARHGAP12
	UNKL	NRIP3	ANKRD36B		ZNF136	COX15	ZKSCAN3
	ABCA7	ZNF441	SERTAD2		CADM4	CENPJ	RBMS2
	TRPM7	USP36	BACH1		MAP3K13	COL4A2	CAT
	SPATA7	RELL1	SOX9		AMDHD2	DHX32	CD47
	IFNE	NET1	IRS1		IFI35	ZBTB18	METTL25
	NFATC3	ZNF551	MGRN1		MPV17	PPP2R5D	MELK
	SNX6	JARID2	PLXNB1		SPPL2B	STEAP3	HEXIM1
	CHPF	FLT1	SLC5A3		CIRBP	ZFP62	PPFIA3
	PDGFA	ISCU	ITSN2		CTSW	PCBP3	CTC1
	RBM26	CTU1	PLEKHM3		BNIP3	ARHGAP6	PIGU
		PHEX	CCDC134		PCDH10	TMEM241	STX8
		MTSS1	ATL1		PRR16	ICK	NDC1
		PRKAB2	CNKSR3		ACOX3	DROSHA	PRSS16
		RELB	GPD1L		IL18BP	HASPIN	SNRPN
		ZC3H12C	KLF10		SSNA1	GOLGA8A	YIPF2
		TRMT61A	GM2A		PXDC1	CKS2	SLC25A35
		CCIN	CEP76		TMEM216	SPTLC2	ZSWIM7
		ERRFI1	VAV2		TAF7	ZNF483	THAP10
		TNFAIP8	TNFSF15		ELP5	ANKRD26	HAUS8
		CYP51A1	RASA2		LDHA	RSRC1	TMEM218
		POMZP3	BCOR		TSC22D3	RBFOX2	FKBP8
		PSMB10	PRDM2		ARL4A	CCDC136	PCBD2
		MCF2L2	DTD2		RIDA	CDK5RAP3	CFL2
		ZBTB34	SHPK		CACNA1A	DSC2	UBL5
		KCTD5	LPAR3		HOOK2	HBP1	FAM122B
		CDCP1	RAB23		BBC3	ANKRD18B	ANXA1
		USP31	MAP3K12		C4A	ABCA2	CD9
		LRFN5	HOXA11		RNF7	PFAS	NDUFS2
		NFKB1	FMN1		ZNF441	HERC2	HOXA1
		B3GNT2	TMEM268		TM7SF2	PHF6	LYPLAL1
		TES	METTL8		EIF2AK3	TBC1D3D	ISOC2
		HIST1H2BK	IRF1		RAB43	GFI1	NPEPL1
		ZBED6	TBC1D8		HIC1	HSD17B4	TRIM46
		BAZ1A	PA2G4		BAG3	NNT	BCL3
		USP15	LIMD1		CAP2	DBF4	FBXO5
		ETV4	TMEM63B		POLR2E	LOX	SHISA4
		ZSCAN25	BBS4		PDE2A	SCRN1	PIGN
		STBD1	FOXN3		DPM3	USP19	TAGLN
		OSBPL3	ATP1A1		C1orf52	LARGE2	MYL6
		AMOTL2	PDCD11		UHRF1	WFS1	PSMG4
		EEF1AKMT4	MYORG		GPX4	TBC1D9B	MED25
		ZNF670	PLCD3		CHAF1A	ZNF85	METAP1D
		TUSC1	ALAS1		ANKRD16	WNK3	FBXW4
		RRS1	MN1		RNF207	USF3	XRCC2
		VSTM2L	SERPINE1		HAUS6	PSIP1	UBXN6
		BMPR1B	CHERP		TBC1D22A	NR6A1	TAF8
		HSPE1	ZNF335		CARM1	ZNF793	OMA1
		RRP9	TMEM151A		UBB	SPC25	ADAMTS12
		ZNF597	NRARP		PIM3	AMN1	EXOC6
		MMP9	RREB1		ACBD4	IQCD	QTRT1
		OGFOD1	CD276		IFT140	CALCOCO1	BPHL
		DENND6B	ZNF462		IFITM2	JMY	LRRC8D
		SERPINE2	DNAJC21		ZNF354C	L3MBTL3	TMTC1
		TGDS	HSPA14		CEP55	N4BP2L2	AMH
		ITPKA	PANK1		COA3	HEXDC	SLC39A11
		RIOK1	TMEM229B		MFSD3	PRR12	NT5E
		PIK3R3	ZNF469		PPARD	EHMT2	LPCAT4
		LAMB3	MFN2		ASB16	RGS17	DCAF4
		N4BP2	WDR41		YIPF2	MYBL1	RNF7
		EIF4A1	KLF11		MCOLN1	PAK3	DPY30
		SERPINB7	FOXD2		MAP2K2	DHX57	CALCOCO1
		POLR1C	IRAK2		FAM32A	NPEPPS	TRABD
		MIER2	RGS12		DPP7	INTS3	GEN1
		FOXN2	SLC20A1		RNF19B	MBTD1	LTBP3
		NT5C3A	TGFBR1		NDUFB6	DSN1	CRAT
		MANF	TAF5L		PPM1F	FBN2	ZNF555
		ZNF787	CAV2		CENPA	RNF141	NSMCE1
		COX19	CLDN1		ATF7IP2	HACD4	TRNP1
		SPON1	USP12		MRPL41	AK5	TAZ
		ATP6V1C2	PELI1		TPGS1	JRK	KIAA0319L
		FUT1	ENOPH1		CLPP	NBPF3	CPNE7
		COPS9	SDC2		PSMB10	FBXL17	PITPNM3
		TRIM55	ZBTB34		STC2	TNS1	SIGIRR
		SLC37A2	SFXN1		PHLDA2	TIAM2	SHC3
		SLC26A4	NOCT		SLC43A2	LMBRD1	TRPC1
		ZPR1	UHMK1		NOLC1	FAM161A	CCDC102A
		ZNF563	ARHGAP22		NEK6	ZGRF1	RNF170
		RBM18	FMNL2		RUNX1	SPAG16	PIGK
		MAP1LC3B	POLR1E		PIMREG	COX18	NDUFB7
		SPATA5L1	GLTP		COMMD6	SLC16A4	DCTN2
		IFIT3	RANBP9		BCL2L11	GLT8D1	HTRA1
		BRIX1	FOXN2		DDAH2	DDHD2	FGGY
		INA	CIC		FOXF2	CTSS	SYNGR2
		RPS27L	DUSP18		TXNL4B	CNTROB	FIBP
		PCDH10	CARNMT1		RIMS3	LYPD1	TRADD
		SRSF8	HIF1A		ITGAM	SSH3	MIS18A
		PARP10	CDR2L		INSYN1	FBXW8	DPM3
		LRRC8B	TSPYL2		ZBTB7A	ALMS1	RABL6
		RALA	ISG15		COLGALT2	APH1B	EFHC1
		FAM207A	STMN3		TIPARP	BIRC5	ENOX2
		FBXO44	MYO1E		NUDT8	RUFY1	IQCH
		OLFM2	WASF2		TRPM4	DLG1	AGL
		SOX4	LYPD6		PCDHGB7	LCORL	PEX11A
		SARS	UTP4		ZCCHC7	CHRDL1	STS
		MED10	ZNF484		SH3RF2	NID1	ATM
		NHSL1	SHROOM1		CDKN2A	NSL1	AP3S2
		RPS10	SH3RF1		MZT2B	GLB1L	COPS6
		SLC9A3R1	SNX2		NIP7	FPGT	TRIM16
		EPHA4	CSGALNACT2		CYLD	CRAT	SUGP2
		SLC1A4	MAP4K4		FAM241A	CCDC149	EFNB3
		C16orf72	ZC3HAV1		CHRM4	TBKBP1	NIPSNAP2
		RPS17	GDAP2		ROGDI	CCL28	GSN
		CMIP	KDSR		MAPRE3	CRIM1	GLIPR2
		RNF144B	BRF1		METRNL	SLC30A9	DAPK2
		C1orf52	AKAP11		HSPE1	ARL6IP1	FAM162A
		IKZF2	PEAK1		RALGPS1	MFN1	KNL1
		DIABLO	SNTB2		KCNAB3	ENPP1	SNAP23
		ATF4	MTSS1		TMED1	PSG9	STK16
		CITED2	SGPP1		SPSB1	VEPH1	DLG4
		GSTO1	SLC10A7		TUBA1C	PCDHB11	CDC42EP1
		BCL7A	SF3A3		METTL2A	CORO6	HSP90B1
		PDK4	POMZP3		PLIN3	ARHGAP35	HSPA5
		ADO	SERTAD4		TIMM8B	YTHDC2	REEP1
		VCPKMT	MFAP3L		CCNL1	MTMR4	MYOF
		SLC39A14	SKI		PCDHB9	PACS1	DBF4
		FBXO45	B3GNT2		ZSWIM4	C22orf39	LTBP2
		CDT1	CASP10		ZBED3	EPB41L1	CTSF
		OCIAD2	NBPF14		RASGRP3	HERC1	DNASE1L2
		CD55	POLR3D		UBXN11	ZNF43	STAP2
		COL4A6	EPB41		MLF1	SLC12A8	JTB
		TLCD1	SPHK1		TSGA10	OSBPL7	TST
		SPATA13	PRPF8		GPALPP1	NEK1	PHOSPHO2
		SDE2	TOR4A		KRCC1	AKT3	NUDT1
		RAB3A	C2orf16		MED26	NUDT6	CDK10
		THAP2	FOXK1		CLK1	SUCLG2	COQ2
		TEX15	POU4F1		GARS	TGIF2	ANKS3
		TAB3	PDLIM1		R3HDM4	AKAP2	KIF9
		CEL	RASGRF1		ERMAP	L1CAM	DNAAF2
		MED17	USPL1		POLR2H	NEMP1	CKAP2L
		TLX3	TES		ECT2	PREPL	ITGAE
		LONRF1	IRGQ		TPRA1	NFIC	IFI27L1
		RELT	SLC6A8		RAPGEFL1	LIMK1	KANTR
		SLC46A1	PRDM15		C9orf16	PGGHG	ENTPD1
		HIVEP3	ANKRD1		SLC35D2	CSTF1	FSD1
		TMEM243	2022-09-11		TPM2	GTF2I	IDH3G
		MLKL	NGF		SWI5	SLC35B4	PGLS
		TMEM201	GAK		FBXO31	STAT1	KIAA1328
		PINX1	ZNF697		TTLL3	APOL1	GHDC
		MRPL12	MREG		NR2C2AP	SLC30A4	SIGLEC15
		NDN	NIPAL1		MNS1	STX7	ROBO4
		ATP5ME	LAMC2		COX17	HACD2	MAP4K2
		KRBA1	PPP1R3C		ATG101	XYLT2	AXL
		COX6A1	YPEL3		C2orf16	APOOL	FBXO17
		EIF2S1	ABTB2		SIRT5	UBE3B	AKR1A1
		PFKFB4	ZBTB7B		RCAN1	CLEC16A	SPOCK3
		P3H2	YOD1		ZNF724	PHF23	BIRC2
		WNT5A	MTMR9		D2HGDH	BPTF	TMEM14B
		ARHGAP22	BTN2A1		SPAG4	CPLANE1	CENPH
		MXD1	B3GNT8		CAPS	OIP5	TMEM217
		DNHD1	ZNF761		FAM229A	AMIGO1	NAXE
		RAB33B	DUSP16		FOXD1	CABLES2	TSEN15
		RAP1GAP2	PEG10		SIRT6	AMDHD2	FAM189B
		HSPA9	RMND5A		FNDC4	FAM72B	C1S
		SPTSSA	PPM1A		CHCHD1	ARHGEF25	CLHC1
		HERPUD1	CA13		IAH1	PCDHB5	CCM2
		FEM1C	NCOA2		TMEFF2	RNF26	NUP107
		TOB1	NFYA		ITPR1	TRIM6	TMEM230
		CSRP1	MED13L		SIK1B	SLC25A35	C1orf216
		TNIP2	NCS1		CCDC149	CCDC66	PSMB9
		SLC19A2	USP46		CDCA5	METTL25	MIEN1
		LY6G5C	KLHL25		KRT34	ACTBL2	BMT2
		POPDC2	RHBDD1		AJM1	LZTS3	URM1
		HES4	IL4R		SPIRE2	TXNRD3	CYBA
		PEAR1	PIM3		CENPN	CRYL1	ARHGAP18
		ETS1	C17orf58		BX255925.3	MBOAT2	SMS
		DDB2	RUNX3		TAF1D	SYTL2	OXLD1
		NTNG2	DSEL		SDSL	ANXA3	PAM
		NKX6-1	SCARF2		MORN2	PCYOX1	APOE
		CDKN2AIP	TCOF1		HAGH	C1orf112	JPT1
		ZCCHC3	RPS6KA5		PSPH	GOLGB1	CITED4
		PDLIM1	TMEM158		SLC9A5	SLC27A3	MPDU1
		HSPA14	CCDC90B		ING4	EFNB3	EPM2A
		SMCO4	STAM		PIGB	RUFY3	TUBA4A
		ASB3	HSPA8		IFT20	SHPRH	WBP1
		HLA-DMA	CBFB		KLHDC4	RB1CC1	PAN2
		SLC16A10	ADAMTS6		ATAT1	MFSD8	TSPO
		UBC	IQCB1		MSX1	TRMT2B	ANKDD1A
		GCLM	VPS4B		NXN	ZNF638	OTUB1
		CEBPG	SCRIB		SPTBN4	PHYHD1	PIN4
		SLC25A45	CASP7		NPHP1	VPS45	RDH11
		KCTD15	FNBP1L		CHKA	PDP1	SLIT2
		NSUN5	PLEKHA5		C19orf24	WWC2	HMGN5
		MBOAT1	NBPF12		EFHD2	RUNX2	ANAPC11
		PANK2	ATAD1		MRPS2	SLC16A2	RIMS3
		EIF1B	MFSD2A		ERN1	LRFN1	NDUFB5
		ALS2CL	KIF1B		RTL8C	PHOSPHO2	TMUB2
		C1orf198	ZFP28		GADD45GIP1	CNRIP1	ECSIT
		ENTPD7	OTULIN		TLL1	KIAA1671	CADM3
		CCDC183	CLN6		IL12A	SHCBP1	ZNHIT1
		LBHD1	ODR4		NFKBIA	MICU1	RARG
		RPIA	ZNF518A		FSD1	IFT88	RGS11
		ITGB4	ZNF74		TMEM255B	HMGCL	TRHDE
		SLC16A1	ZNF765		GATD1	EXOC2	SUN2
		MRTO4	GRAMD1B		SHISAL1	ZNF514	COX18
		TP53I11	EEPD1		ALDH4A1	EVA1C	PKN1
		NIP7	TSSK6		HMGN3	APC	DHRS7B
		EDEM1	IPPK		TSEN15	UFSP2	TMEM219
		PITHD1	GSK3B		FAM43A	GTPBP2	MZT2B
		PLEC	CYSTM1		SPC24	FBXO9	PIGZ
		SASH1	TGFBR3L		IQCE	PIGM	CYHR1
		GPR4	ACP7		NTMT1	MDC1	CFH
		S100A6	SLC3A2		ALPK2	TNFRSF19	TMEM42
		CCDC86	SHC1		ZNF34	CTH	PTOV1
		MOCS3	FCHSD2		TOB2	DRP2	PMVK
		RPS21	MT1X		IRAK1	PCDHB9	UBOX5
		MAMDC4	GYG1		HHLA3	SEC14L1	RSAD1
		EMILIN2	RBBP8		DECR1	VANGL2	ETFDH
		YDJC	ZNF417		HID1	C21orf58	GBP1
		TXNRD1	SMG6		SH2B1	ATF6	CTSO
		LSM7	ASAP1		RGS4	BMPER	LMBRD1
		COL5A3	FOXP4		MVD	SEMA3D	HIKESHI
		KTI12	FRS2		MRPL47	SLC38A10	ARHGAP19
		MREG	TSHZ1		TMEM140	VANGL1	FBXW8
		SLC25A30	FAM168A		SPATA2	ZNF331	NES
		ZNF316	HSPA2		PACS2	ZDHHC23	TM7SF2
		IL4R	FOXO1		DEPDC7	STIL	WDR54
		ACVR1C	ZNF777		MEIS3	PIGK	ATP7B
		KANSL2	YAP1		IQCB1	TDRD3	RILP
		DGKI	SLC2A8		ZNF440	ALAD	GPR155
		CASZ1	ATP2B4		ZBTB43	TXNIP	TSEN34
		MOB3B	ZPR1		2022-09-06	TMEM106A	PPARG
		FOXO6	ALKBH8		HIST1H2AC	ATG16L2	ORC3
		PSAT1	ZNF143		DBR1	VPS35L	MFSD10
		TSPYL2	DRAM1		SMCO4	NNMT	ACO1
		TFAM	ISCU		SDK1	MLPH	C8orf88
		PTGER2	SLC2A1		GNAZ	WDR35	FAM149B1
		MTO1	DDAH1		TMEM175	WASHC2A	C11orf68
		DHX33	OSBPL8		ARMC4	KCNMB3	STIL
		ATP1B3	TMEM246		JPH2	BRCA2	COQ7
		NPTX1	TLNRD1		PPDPF	STS	CHRDL1
		ORAI1	ANKRD44		BIRC2	CD47	PNKP
		TRAF3IP2	PGBD2		EGLN3	MARF1	ARHGEF1
		AGO2	PUM3		CTGF	RAB3IP	AC093323.1
		DDX3Y	NUDT11		SOWAHC	DMXL2	KHDC4
		ARHGAP27	MYO1B		NRF1	CASC4	ZNF48
		RPS28	ONECUT2		RAD23A	CYP2R1	PFKM
		SKI	RNF38		CALD1	SLC24A1	TCTN1
		DTL	STPG1		AZIN2	GOLGA2	MRPS21
		FGFR4	CDYL2		ATF4	TMEM107	SIRT3
		C18orf32	DNAJC1		SAMD10	UBN2	NFU1
		RETSAT	B4GALT6		CRYZ	NFS1	GMDS
		NDUFB2	HACE1		SEL1L3	AP5B1	SKA3
		UTP4	CNOT6		HIST2H2BE	KCND1	HSPE1
		TMEM173	LRP12		GRAMD1C	APBA1	CCDC157
		TSLP	PDPK1		NCBP2	ZNF573	GNPTG
		ROBO4	CEP83		TNFAIP8L1	MTHFSD	COG6
		NOG	POM121C		TMEM205	ERLEC1	TMEM156
		ATP2A2	ST5		DNAJC6	TRMT10A	POLA2
		SLC35D1	FOSL2		ZNF169	ATG2A	NAPRT
		ISOC1	RAD54L2		NMRK1	ATP6V1A	MRPS34
		TCAP	LRRC8A		ZNF358	GPR176	RUVBL2
		ABLIM1	SYDE2		DALRD3	N6AMT1	ZNF404
		VDR	UGDH		RARA	SNX19	SPDL1
		FRAT2	PRPF18		GAS6	NCSTN	LMAN2L
		CRAMP1	IFNGR1		UBOX5	PIGV	SWI5
		NSUN2	SOCS4		ALDH1L2	C19orf71	NCF2
		ICAM1	CDC25A		CRAT	ARSJ	NUDT16
		IL1RAP	TNKS2		DOCK2	PTPRA	TCTN2
		SGTB	CFAP45		TMEM45A	JHY	CCDC24
		DRD4	ARHGAP42		RABL6	TUBGCP6	FZR1
		RAB11FIP2	ATP1B3		PTGR1	ABTB1	NUCKS1
		DAB2IP	RANBP10		TPD52	SKA1	GALNT6
		USP43	SEC22A		NXPH4	PLS1	PRAF2
		TRIM3	CCNE1		ACP6	IPP	TMTC2
		SLC43A3	ZC2HC1C		POLR2J	SYNE2	FAM104B
		SHANK3	ELOA		C22orf23	UBR2	LOXL3
		AKAP17A	TNFSF10		FIBP	CYB5R4	PCCA
		CLDN15	SENP6		MYPN	ABR	ADD3
		TERF2IP	ROCK1		ECHDC2	VPS39	HSPB1
		PDXP	HPS5		EHD1	MED25	CENPT
		P2RX5	CAMSAP2		GNB3	NIPSNAP1	STMP1
		TIGD3	ELOVL4		RPS6	CDH2	HMGCL
		FAM91A1	DCTN5		AGAP6	RNASEL	C14orf93
		SLC15A3	ZNF451		ZBTB2	LRTOMT	DNAL4
		PKIA	C2CD3		CLCF1	COL18A1	SNX29
		TUT7	TRIM47		CALR	FBXL7	BIN3
		MZT2B	ZNF668		CSF1	ZBTB37	FAM227B
		UTP3	NIN		ABHD17B	ARHGEF12	TPM4
		CORO2B	IFRD1		ANKRD13A	NRBP2	TMEM132A
		RSL24D1	BANP		RGS20	RAB6B	ATG10
		HIST1H2BD	KIAA1586		MIF4GD	NUMA1	INSIG1
		GOLT1B	TMEM184C		BPHL	ZNF517	SFXN5
		TSHZ3	AFF1		VIM	EYA4	ATP5F1A
		KIF26A	FAM171B		PTRHD1	STAT5B	VAC14
		SLC35C1	RIC1		ARL3	PIGB	BAD
		CCNT1	MRAS		FAM167A	TMEM237	CABLES1
		PPM1A	DTX3L		SPATA5L1	ABCA5	SDF2L1
		JCAD	XK		APLN	FASTKD1	CLCN6
		TBC1D2B	SPSB1		TIMM17B	MXD4	COL4A2
		HNRNPF	GCLM		ZNF302	ADGRA3	NUP35
		SPTY2D1	GFOD1		DUSP5	FAM83D	C16orf74
		SNCG	MMS22L		MIIP	INPP4A	RPA3
		ANKRD1	CCDC15		PPIH	CCDC7	SHARPIN
		ZNF263	PPP2R2A		TRIM35	STX17	SHMT1
		TNFSF13	EFNA5		YRDC	MOCS1	GMPPA
		RSL1D1	KDM2B		CLASRP	SKIV2L	MYH14
		CNBP	TSHZ3		MUS81	SMIM8	FBLIM1
		RYBP	F8A1		SYNGR2	FAM155A	JMY
		SNRK	LRP11		COPS9	KCTD7	LAMA5
		ARID3B	HTR7		SMIM26	SPTBN1	CEP126
		EDN1	CEBPB		ZNF557	MRPL19	INTU
		MRPL49	NKX2-4		EVL	PGRMC2	PIH1D1
		POLR1E	RXRA		FOXC2	ZNF225	MLPH
		ARID3A	SP100		HMCES	MGAT4A	POLG2
		NUTM2D	SLC35F5		ITPRIP	PAX6	NDUFB3
		TP53RK	BRF2		LAMTOR4	UROS	ESCO2
		ARF6	PLEKHA1		BRI3	ARHGEF1	ZBTB22
		SLC25A28	TMEM131L		MYL9	ALDH16A1	IL4I1
		PELO	SYNPO		CGRRF1	SEMA6B	UBAC2
		WDR47	LMCD1		SMC4	EXTL2	FASTK
		EBI3	KCTD9		KIF23	CSAD	C4orf48
		RPL24	EPN2		EVA1A	SYTL3	KIRREL3
		CCNG1	ANKRD11		C9orf85	FAM120C	TMCO3
		JPH1	CHORDC1		ASNA1	ANPEP	DTWD2
		IFRD1	SERTAD1		SPAG16	MAN2B2	MRPL43
		ZNF598	BICD2		ZNF778	SOX12	KATNB1
		TNIP1	USP37		RABL2A	ELP4	MMACHC
		NXT1	KCNG1		ANXA1	ZNF169	RNF141
		HTRA3	MLXIP		GLDC	PITPNM3	GLI2
		RASSF8	TBC1D13		BEX3	NEDD1	ISCA2
		DBR1	ATP6V1D		GSTM3	ZSCAN26	VASH1
		DCUN1D3	CNKSR2		THYN1	CYTH2	C1GALT1C1
		IER5L	PCDHB2		KYAT3	KMT2E	RFXANK
		TXNDC17	ZNF485		BCAM	SPOCK3	PARP8
		SLC25A38	CTHRC1		CHRNB1	QARS	TMEM170B
		EVA1A	ADRM1		TTF1	GRIPAP1	PPM1F
		DYNLL2	ZFP90		DZIP3	KCTD21	PGP
		TMPPE	CASP2		KLF2	TPM1	ID3
		RABGGTB	POLK		SEM1	DARS2	FDPS
		SELENOS	IGHMBP2		FSD1L	TOX	PPIL2
		EEF1AKMT1	LAMB3		SBNO2	ZNF575	BTN3A2
		SPRYD7	YWHAG		U2AF1L4	CAB39L	IFNE
		SLC12A2	EPHB4		NFIL3	AP2B1	WASHC3
		SGMS1	KIAA1549L		ABR	KANSL1L	DIMT1
		IGFBP4	HSPA9		POLE3	CCDC61	RNF26
		HRH1	URB2		CCNT1	SLC38A6	SIX4
		KHK	FICD		SNAPC5	TESMIN	LRRK1
		INAFM2	SAMD5		SHC2	PPM1B	C2orf68
		USP2	AGAP1		CEMIP	LPIN2	CBX3
		RPL38	MAMDC2		EEF2	KYAT3	NECTIN2
		CIAO2B	RAB40C		GPT2	SAMD9L	SAMD10
		SLC16A3	MAPK7		MSMO1	ZNF605	HHIPL2
		RHOBTB2	ZNF527		XAB2	KDELC2	TRMT61B
		STX3	IRF2BPL		TUSC1	HEATR5B	C4orf3
		ARMC5	SUSD5		GPR157	GATB	LYRM7
		NOM1	MTSS1L		HACD1	NINL	TMEM25
		ZNF317	TACC1		PSMB7	TUBGCP5	CD99L2
		ESS2	ADAM23		BTG2	KLHL5	SFXN3
		BTN2A1	ADM		GAL	KATNAL1	WDR19
		LY6K	DGCR8		PLAC8	MINDY1	RFC4
		B3GALNT1	TMEFF2		GRPEL1	GYS1	MPLKIP
		FAU	CHST10		2022-03-02	USP27X	STARD4
		FAM83G	DDI2		COQ10A	PTCD3	TUBB
		GPRIN1	ZKSCAN2		NDUFA8	ZNF512	MRPL28
		WHAMM	SPATS2		PROS1	ATF6B	CCDC138
		CASP10	PPCDC		RPL7A	POSTN	STK11IP
		SKIDA1	PCBP4		ZNF558	TRIM37	MPG
		FBRSL1	TRPM7		DIMT1	ZNF443	GMPR2
		SERTAD4	ZNF703		RBMS3	PNISR	CUTC
		NME1	NRROS		EEF1AKMT4	CKAP2L	RNLS
		TYRP1	PHYHIP		POLR1C	EEFSEC	CUEDC2
		SCRIB	HIST1H2BK		GRB10	TTC13	CHEK2
		PRELID3A	NEU3		ETFRF1	DYM	PPIH
		HS3ST3A1	DTL		ATP8B3	ARNT2	FOXG1
		RAG1	MKLN1		SGTB	PGM2L1	SSU72
		CHD7	HARBI1		ATP5MD	ATP6V0A1	ARL2
		LLPH	AHDC1		PFKM	C5orf24	PDE4DIP
		KLF16	GPATCH4		2022-03-01	TNS3	WDR62
		USE1	KLHL15		TMUB2	EEF1AKMT2	TRPM4
		ADAMTS7	TRIM11		TAPBPL	TCEAL1	SLC35A1
		ELOC	TCF20		RUVBL2	RHNO1	PPP1R7
		CCDC59	CHML		BCAS4	MYO7B	BTN3A3
		CPSF4	ANTXR2		WDR18	ZNF397	SMPD2
		SUCO	MICALL1		RPS21	CUL7	MEGF8
		NFIL3	STX1A		LARP6	ICE2	DMAC1
		PHAX	NAMPT		C19orf53	TUBA1A	CRMP1
		FASTKD5	OSBPL10		LY96	SLC35A5	PRR7
		PRRG1	ESYT2		TBC1D2	ENTPD5	AC005726.1
		FHL2	LIMA1		RAB5C	FBXO5	CCDC92
		FKRP	SNTA1		GLRX	ARHGEF28	SLC25A4
		DGKH	ZFR		SURF2	WDTC1	CREB3L4
		DBH	TBC1D9		ZNF580	PPP2R5C	C15orf40
		NKX2-6	POLR3A		NAA38	GEMIN8	CCDC167
		EXO5	KIF21B		HNRNPF	CPSF2	JHY
		QRICH2	MNX1		PDK1	ZNF519	CACNA1G
		AC010616.1	APOL6		WDR74	PPP1R21	ASF1B
		SPRED2	WHAMM		TMEM39A	COQ7	FAHD2A
		CDCA4	MMP16		ACTG1	CLOCK	MRPL24
		ZNF773	PLEK2		C2orf92	PEX19	KDELR3
		CEBPZ	FANCA		PLIN4	GPR173	GSTM4
		TGFBR1	FAM83G		CDC26	PSKH1	CENPN
		GOLIM4	KLHL18		CREB3L1	ABCD4	ZNF653
		TRIM32	ZNF562		ANKRD10	ATP2C1	POLR2J
		SIRT6	PUSL1		DCUN1D5	LTB4R2	UROD
		GNAI1	NIPA1		PPP1R3F	GPALPP1	COMMD3
		ZSWIM6	NAP1L5		TMEM8B	COL4A4	RTN2
		TMEM217	DCP1B		SS18L2	ATP11C	AKTIP
		RBMS1	STXBP1		UQCRC2	SKA2	ICAM5
		NOP2	TCF12		ANKS6	USP49	WDSUB1
		ABCC3	TMEM168		KLHL22	HOXC10	DTX3
		MAGEA3	BVES		TRABD	STYX	ACAT1
		MRPL18	HSDL2		SUPV3L1	MSRB3	RHOBTB1
		GNA13	LHFPL2		ZYX	SCYL3	MYPOP
		CXCL16	STRN		MYDGF	SEPHS1	DCXR
		ZNF710	TTPAL		POP5	MRPS27	EFEMP2
		UBAP1L	MAST2		SLC1A5	ZNF253	WDR35
		TMSB15B	IMPDH1		ANAPC11	ZBED3	HDGF
		LYRM1	HELLS		FAM229B	CCDC126	CHCHD6
		PFDN2	SLC4A7		PSMC3IP	TRIM5	FOXRED1
		CLTB	TRIM36		LYAR	CA5B	PFN2
		ARL8A	NFATC1		SIGIRR	MEX3A	IQCE
		MRPL52	CRABP2		COMTD1	MAP4	STMN1
		PPP2R2A	SERPINB2		ZBTB34	ITGAV	NAGLU
		ZBED9	FAM84B		EXO5	CCAR1	NDUFA1
		NOP58	CERS5		RBBP6	GOLPH3L	METTL4
		SUPV3L1	PHRF1		BTG1	NID2	TMEM9
		TBC1D2	AOC2		ZNF432	RCOR3	SUMF1
		ATP6V1E2	C5orf22		DDX21	PROSER3	ACAT2
		KIF26B	TRMT6		DNAL4	WDR62	MSRB2
		TMEM185B	CNNM3		AQP3	DMAP1	SREBF2
		ZNF761	ASAH2B		CYP51A1	CCDC120	HAUS5
		IVNS1ABP	SRC		TUB	LMF1	SURF1
		PBDC1	SLC7A6		KLF6	RNF145	ATP5S
		MT2A	CSRP1		SKA2	DOCK11	MRPS27
		POP7	SMG7		ALG2	PDSS2	PPM1B
		LRFN4	TXNRD1		CMTM7	ARFGEF3	PRDX5
		DBNDD2	CARD10		IGSF9	COA5	HIST1H2BD
		WDR66	ETS1		MFSD10	CORO2A	GABARAPL2
		AADAT	MED15		DDX31	RNF123	RNF123
		GLTP	DIABLO		PPP1R7	PLIN3	ZNF546
		DAGLA	DHRS2		FBXL5	MAGED1	FLOT2
		RNF126	ZNF470		ECI1	BMPR2	SNRPA
		PRNP	SIKE1		TCEAL4	KALRN	ARSA
		APOPT1	AKAP1		KIAA1586	TENT5B	CHST12
		TIMP1	GMEB2		PTER	NIPSNAP2	PMM1
		SRC	ZNF347		MEX3D	SCN5A	CCDC28A
		ZNF26	USP36		CLTA	NFIX	RAD21
		OTULINL	CNST		LRP5	CPPED1	MIPEP
		ABHD15	BAG1		ZNF830	ADAM9	B9D2
		LHX1	PCNX4		C19orf25	BCR	SLC25A1
		MAPK8IP2	FOXJ2		PARD3B	C11orf80	ACSS2
		TMEM70	TSPAN5		SLC45A3	LTBP1	RHNO1
		LIMK2	TRUB1		ZNF510	PABPC4L	VPS29
		HELZ2	EMSY		TACC3	VPS53	TANK
		SLC4A11	PARP12		CRIM1	SNAP23	HEMK1
		YWHAG	LRRC57		CBY1	SUN2	KAT8
		TNFRSF12A	BAG3		SMNDC1	PEX1	UQCRC2
		CARD10	TSC22D2		PTGS2	FDXACB1	TWIST2
		ZNF513	GPR4		PMF1	RFX1	OPN1SW
		UGDH	SFMBT1		HK2	MAN1A2	GRIPAP1
		PGAP1	FANCE		MAD2L1	IDH1	ARL16
		RBM22	NABP1		EDF1	TMEM44	SAMHD1
		MXRA8	CNOT6L		RFK	ME3	TRMT2B
		EMC6	PINX1		AMOTL2	ZNF182	PATJ
		SERTAD2	SPTY2D1		CDV3	ARMC2	H2AFZ
		AKAP12	KCNIP3		SINHCAF	CBY1	SMDT1
		LRRC3	PLIN2		DNAJC7	FER	IFI35
		CSNK1A1	RB1		RND3	CLK4	CCDC25
		RUNX3	SALL1		TECR	CC2D1B	NDUFV1
		RDH10	ZNRF1		ATG4D	KIF22	MYLK
		ALKBH8	LITAF		ZBTB6	LAYN	LSM10
		RPL37	IPO7		COL18A1	HEATR5A	DPAGT1
		LRRC8E	NBPF26		BLOC1S4	SIM2	ITGA1
		PLEKHA3	2022-03-08		CYR61	JMJD8	MOGS
		ATAD3B	CD46		SURF1	ZNF559	TCF25
		RNF4	MOB3A		FPGS	STK11IP	TMEM205
		UTP25	ZNF407		ARMCX3	REPIN1	CFDP1
		SCHIP1	IFIT3		PMPCB	SLX4IP	EIF2B4
		PYGO1	ZNF202		THOC6	AP3M1	CCDC57
		CDIP1	PDE12		GABARAPL2	RARG	MAGI2
		KDM6A	PPME1		OSBPL7	PCDHB13	SKA1
		TBPL1	ZBTB14		HEXDC	GPX8	ARMCX1
		TRMT6	GNPNAT1		SGTA	VMP1	NUP37
		STC2	FUT10		BEND7	ANP32A	NID2
		ATP6V0C	TMEFF1		CKS1B	TSPYL4	PRKAG1
		CD14	PPP1R10		PBK	AGTPBP1	SERINC2
		LITAF	ZNF708		DNAJB6	SCMH1	CYB5D2
		ENOPH1	FAM20B		CDC37	XRCC2	BRI3
		GSR	SPIRE1		CCNA2	CLK2	P3H3
		CYCS	NCKIPSD		STX8	PIK3C3	PCID2
		ZBTB43	UBE2H		SLC41A1	MYO1C	DUS2
		ARFGAP1	CCNJ		SENP5	PAN2	DUT
		GIT1	SNX8		MVB12A	ACADS	EVA1C
		SEC61A1	RTTN		RPL22	TNC	SPATA24
		RNF6	TAF13		KLF11	TMEM79	ATG7
		MTLN	ZNF792		MAGOH	HOXC9	COG5
		MEF2A	SPRYD7		MAFF	IGF2BP2	MECR
		UBIAD1	ZNF548		ONECUT2	RPS6KC1	TECPR1
		GAD1	PLEKHF2		KRT18	EIF2AK2	SOD2
		NLE1	CLCC1		RABGGTB	SNX14	TMEM123
		DNAJC5	EIF2S1		NDUFA2	FANCI	ATG4C
		MAPK13	JAK2			EHD2	SCN5A
		PDZD4	ATAD2B			ZNF852	PSMD10
		GJA1	MAPK8			ARID1B	AJUBA
		SNRPB	MPRIP			ZZEF1	TRIM41
		PGBD2	PLCE1			ZFPM2	NR1D2
		PLEKHF2	DZIP1L			TPD52	MAF1
		ZFYVE27	ZFP1			BABAM2	UGGT2
		ERO1B	EXT1			FKBPL	ATP5PO
		S100A10	FEM1B			TFB1M	ADGRB2
		FHDC1	TRIM55			ARID2	IFT88
		ATP2A1	AHCTF1			MLH3	UBE2D4
		NETO2	TMEM33			POC1A	ZNF572
		ZNF511	LATS2			DAG1	ZC3H6
		OTUD4	DYRK2			POLG2	FADS2
		DUSP2	KIAA2026			TMEM50B	ENSA
		CFAP20	SOCS2			STAU2	ZCCHC18
		IRS1	ZNF525			NFE2L3	FARS2
		PUS1	PKNOX1			PRR14L	P2RX4
		GRPEL2	SPECC1			ODF2L	C5orf24
		CCDC8	RALY			TAF9B	CRADD
		PHPT1	CDC42EP3			SKA3	MYL12A
		NIPAL1	MOV10			SPIDR	YBEY
		BCL6	RBM12			SEL1L	C3
		AP4S1	NPAT			NIPAL3	TAB1
		ZNF256	RUSC1			ELMOD3	ABTB1
		C18orf25	HSD17B12			TSSK4	APEH
		LCAT	SLC40A1			INTS8	ARGLU1
		RFTN1	HMGXB3			MPP2	ADAM9
		PRPF39	NT5C3A			RBBP9	PTGR1
		ADTRP	TMEM65			SPPL2B	TMEM69
		PGBD5	CTPS1			CLSTN1	GALNT7
		BRF2	AARS2			VRK3	MFSD1
		ARPC5L	SGTB			IGF2R	COMMD9
		SH2D5	CCNB1IP1			ZNF106	ARNT2
		PHLDB3	RHOF			DEPDC5	2022-03-09
		CLK1	SLC2A3			SAPCD2	SARAF
		PXDC1	BRWD1			PAPPA2	CYB5A
		ANKRD11	ZNF197			NHLRC2	ZNF76
		POM121C	CHSY1			CHURC1	LSM4
		ALKBH2	CHST14			AP3B1	FMN2
		CCNB1IP1	LETM1			GABRE	EVL
		TMEM11	KLHL20			H2AFV	COPZ1
		DKC1	WRAP73			TMCO6	GTPBP2
		ITGA6	GUF1			UBAP2L	SMARCA1
		ITPA	TM7SF3			SCD	DBNDD1
		OGFR	ZC3H18			TMEM260	USP40
		EI24	KIF5C			LMBR1L	SAMD14
		CAV2	PLXNA1			APPL2	ROBO3
		TOLLIP	RASSF5			ZNF439	RPAIN
		CLDN1	ALMS1			WIPF1	SWT1
		RHBDF2	DCAF12			HOOK3	FBXL17
		SETD9	PDE4B			DNAJC30	MEIOC
		MRPL32	ENO2			AFDN	WASF1
		CSNK2B	NT5DC3			L3MBTL1	HNRNPH2
		RBM15	PIP5K1A			TRPM4	CHMP2A
		GPATCH4	ZNF18			LRCH3	CD151
		SRP19	DYNLL2			FAM120B	LEPROT
		SURF6	GPAT4			SLC9A6	ZNF512
		IP6K2	SIGMAR1			BIVM	NDUFB6
		POLE4	SCG5			HNRNPUL2	AP1G2
		SINHCAF	MAP6			DFFB	ACTR3B
		ISG20L2	VAPB			RABL3	SVIP
		PSMC3IP	TGDS			ITFG2	TMEM237
		POLR2K	THUMPD2			CFL2	ZNF839
		ZNF140	NRIP1			NECTIN2	CYP2U1
		CCDC85B	NOM1			PINK1	NPM3
		FDX1	SMO			AP5S1	ARL6IP6
		TMEM18	KMT5B			SCAMP1	PNISR
		ATP1A1	UNC13B			SLC11A2	ZMYM1
		CD276	PLEKHA3			NUCB2	TMEM120A
		ZMYND19	IGFBPL1			ZKSCAN7	DCAF8
		ZBTB11	QDPR			PKP3	ZNF580
		TKT	WDR17			COL4A5	PARK7
		COMMD5	PELI2			CRTC1	UBA3
		THBS2	STX3			MECOM	LIN9
		CRISPLD2	SRRD			NCOA2	FGFR1OP
		TSSK6	ZNF124			RGS9	MKS1
		CDV3	RUFY2			AFAP1L1	PCDHB5
		BLOC1S4	COL7A1			PBXIP1	SCARA3
		PLCXD1	SLC37A3			ZNF93	NDUFB10
		CNST	MOSPD1			PPP1R13L	CXCL6
		STMN3	SNRNP48			STAT6	PCDHB14
		EIF6	SETMAR			OTUD7B	DHFR
		ZNF274	PLCXD1			ZNF606	SCAND1
[truncated: 388 more rows]

## Sheet: S2
Supplementary Table S2. Enriched functional annnotation terms associated with significantly up-regulated genes in KO 0h vs WT 0h.
ONTOLOGY	ID	Description	GeneRatio	BgRatio	pvalue	p.adjust	qvalue	geneID	Count
BP	GO:0030198	extracellular matrix organization	62/1079	393/18862	2.91277e-13	7.46755e-10	5.73938e-10	LUM/DPP4/COL15A1/SERPINF2/PECAM1/GREM1/IL6/TIE1/ELF3/MMP7/MMP9/COL24A1/COL16A1/CTSS/LAMC2/MPZL3/LOXL4/ITGA11/PTX3/COL4A6/SH3PXD2A/ITGAM/LAMB3/COL17A1/MMP14/CSGALNACT1/LCP1/COL7A1/COL8A2/TIMP1/ITGA2/THBS1/TNFRSF11B/COL6A3/ITGA1/ADAM8/MMP2/ITGA7/KDR/SPINT2/FGFR4/MFAP2/LOXL3/ADAMTS12/MMP17/ITGB8/FAP/SOX9/FGF2/LAMA5/LAMB1/LAMA1/OLFML2A/LTBP3/CYP1B1/SPINT1/ADAM15/ITGB5/F11R/ADAMTS3/ERO1A/FKBP10	62
BP	GO:0043062	extracellular structure organization	62/1079	394/18862	3.27072e-13	7.46755e-10	5.73938e-10	LUM/DPP4/COL15A1/SERPINF2/PECAM1/GREM1/IL6/TIE1/ELF3/MMP7/MMP9/COL24A1/COL16A1/CTSS/LAMC2/MPZL3/LOXL4/ITGA11/PTX3/COL4A6/SH3PXD2A/ITGAM/LAMB3/COL17A1/MMP14/CSGALNACT1/LCP1/COL7A1/COL8A2/TIMP1/ITGA2/THBS1/TNFRSF11B/COL6A3/ITGA1/ADAM8/MMP2/ITGA7/KDR/SPINT2/FGFR4/MFAP2/LOXL3/ADAMTS12/MMP17/ITGB8/FAP/SOX9/FGF2/LAMA5/LAMB1/LAMA1/OLFML2A/LTBP3/CYP1B1/SPINT1/ADAM15/ITGB5/F11R/ADAMTS3/ERO1A/FKBP10	62
BP	GO:0045229	external encapsulating structure organization	62/1079	396/18862	4.11814e-13	7.46755e-10	5.73938e-10	LUM/DPP4/COL15A1/SERPINF2/PECAM1/GREM1/IL6/TIE1/ELF3/MMP7/MMP9/COL24A1/COL16A1/CTSS/LAMC2/MPZL3/LOXL4/ITGA11/PTX3/COL4A6/SH3PXD2A/ITGAM/LAMB3/COL17A1/MMP14/CSGALNACT1/LCP1/COL7A1/COL8A2/TIMP1/ITGA2/THBS1/TNFRSF11B/COL6A3/ITGA1/ADAM8/MMP2/ITGA7/KDR/SPINT2/FGFR4/MFAP2/LOXL3/ADAMTS12/MMP17/ITGB8/FAP/SOX9/FGF2/LAMA5/LAMB1/LAMA1/OLFML2A/LTBP3/CYP1B1/SPINT1/ADAM15/ITGB5/F11R/ADAMTS3/ERO1A/FKBP10	62
BP	GO:0001666	response to hypoxia	53/1079	348/18862	6.19758e-11	8.4287e-08	6.4781e-08	DPP4/CARD16/PTK2B/PLAU/CLDN3/TLR2/STC1/ANGPTL4/CXCL12/PSMB9/MMP14/NOX4/PGF/PSME2/ITGA2/SOD2/THBS1/ADORA1/PSMB5/AQP3/ADAM8/PLK3/MMP2/PSME1/PSMB10/NDRG1/PSMB8/PSMC6/EDNRA/TGFBR2/SFRP1/PSMA6/NKX3-1/PINK1/PTGS2/CASP1/SCFD1/PMAIP1/CPEB2/PML/AJUBA/VEGFB/ADAM15/PSMA7/PSMA1/XRCC1/BAD/USF1/SLC11A2/ZNF354A/KCNK2/ERO1A/TGFBR3	53
BP	GO:0036293	response to decreased oxygen levels	53/1079	360/18862	2.2252e-10	2.27281e-07	1.74683e-07	DPP4/CARD16/PTK2B/PLAU/CLDN3/TLR2/STC1/ANGPTL4/CXCL12/PSMB9/MMP14/NOX4/PGF/PSME2/ITGA2/SOD2/THBS1/ADORA1/PSMB5/AQP3/ADAM8/PLK3/MMP2/PSME1/PSMB10/NDRG1/PSMB8/PSMC6/EDNRA/TGFBR2/SFRP1/PSMA6/NKX3-1/PINK1/PTGS2/CASP1/SCFD1/PMAIP1/CPEB2/PML/AJUBA/VEGFB/ADAM15/PSMA7/PSMA1/XRCC1/BAD/USF1/SLC11A2/ZNF354A/KCNK2/ERO1A/TGFBR3	53
BP	GO:0001819	positive regulation of cytokine production	60/1079	437/18862	2.50678e-10	2.27281e-07	1.74683e-07	IL18R1/LUM/F2RL1/C3/INAVA/SERPINF2/TLR4/IL1B/IL6/CSF2/IL18/SERPINB7/CD74/CSF1R/POU2F2/IL1A/TLR2/PDE4D/WNT5A/SEMA7A/GATA3/SPN/LTB/PTPN22/THBS1/CCDC88B/EBI3/ZP3/CD14/GPSM3/ADAM8/NFATC4/CEBPB/TLR6/TRIM16/IL1R1/FADD/LAPTM5/PDE4B/PTGER4/GBP5/IL7/POLR2L/PTGS2/CASP1/PQBP1/CYP1B1/F2R/CASP8/CYBA/IRF3/TRIM6/POLR3K/HLA-A/IL15/CD58/NLRP1/PARK7/IRF7/HYAL2	60
BP	GO:0052547	regulation of peptidase activity	61/1079	455/18862	4.66031e-10	3.62173e-07	2.78357e-07	C3/ANXA8L1/SERPINF2/TNFSF15/SERPINB2/CARD16/LAMP3/SOX7/SERPINB10/ANXA8/TIMP3/SERPINB7/MMP9/CLDN3/PSMB9/XDH/COL7A1/WFDC3/TIMP1/IFI6/PSME2/THBS1/COL6A3/HMSD/PSME1/SPINT2/MAGEA3/PSMB8/EFNA1/PCSK1N/HSPE1/MAP3K5/FADD/PSENEN/PRDX5/LAPTM5/NKX3-1/ATP13A2/PINK1/BIN1/TBC1D10A/CASP1/SERPINE2/TNFAIP8/SNCA/PCOLCE/PMAIP1/PDCD5/PML/F2R/SPINT1/CASP8/APH1B/DDRGK1/BAD/FIS1/SERPINB8/NLRP1/PARK7/HTRA2/CSTB	61
BP	GO:0052548	regulation of endopeptidase activity	57/1079	426/18862	1.8821e-09	1.27983e-06	9.83643e-07	C3/ANXA8L1/SERPINF2/TNFSF15/SERPINB2/CARD16/LAMP3/SOX7/SERPINB10/ANXA8/TIMP3/SERPINB7/MMP9/PSMB9/XDH/COL7A1/WFDC3/TIMP1/IFI6/PSME2/THBS1/COL6A3/HMSD/PSME1/SPINT2/MAGEA3/PSMB8/EFNA1/PCSK1N/HSPE1/MAP3K5/FADD/PSENEN/PRDX5/LAPTM5/NKX3-1/ATP13A2/BIN1/TBC1D10A/CASP1/SERPINE2/TNFAIP8/SNCA/PMAIP1/PDCD5/PML/F2R/SPINT1/CASP8/APH1B/BAD/FIS1/SERPINB8/NLRP1/PARK7/HTRA2/CSTB	57
BP	GO:0070482	response to oxygen levels	53/1079	385/18862	2.57093e-09	1.55398e-06	1.19435e-06	DPP4/CARD16/PTK2B/PLAU/CLDN3/TLR2/STC1/ANGPTL4/CXCL12/PSMB9/MMP14/NOX4/PGF/PSME2/ITGA2/SOD2/THBS1/ADORA1/PSMB5/AQP3/ADAM8/PLK3/MMP2/PSME1/PSMB10/NDRG1/PSMB8/PSMC6/EDNRA/TGFBR2/SFRP1/PSMA6/NKX3-1/PINK1/PTGS2/CASP1/SCFD1/PMAIP1/CPEB2/PML/AJUBA/VEGFB/ADAM15/PSMA7/PSMA1/XRCC1/BAD/USF1/SLC11A2/ZNF354A/KCNK2/ERO1A/TGFBR3	53
BP	GO:0034612	response to tumor necrosis factor	46/1079	320/18862	7.47438e-09	4.06606e-06	3.12508e-06	F2RL1/GGT5/CXCL8/TNFSF15/CARD16/PTK2B/GGT1/ZC3H12A/CCL7/GATA3/PSMB9/ASS1/LTB/PSME2/THBS1/NFKBIA/PSMB5/TNFRSF11B/CCL2/CD14/TNFRSF21/PSME1/PSMB10/TNFAIP3/GPS2/TNFSF12/PSMB8/CCDC3/MAP3K5/PSMC6/ADAMTS12/SFRP1/PSMA6/LAPTM5/NKX3-1/TXNDC17/CLDN1/CASP1/CASP8/GBP2/PSMA7/PSMA1/CD58/PID1/TRAF4/HYAL2	46
BP	GO:0071356	cellular response to tumor necrosis factor	43/1079	296/18862	1.68163e-08	8.31641e-06	6.39179e-06	F2RL1/CXCL8/TNFSF15/CARD16/PTK2B/ZC3H12A/CCL7/GATA3/PSMB9/ASS1/LTB/PSME2/THBS1/NFKBIA/PSMB5/TNFRSF11B/CCL2/TNFRSF21/PSME1/PSMB10/TNFAIP3/GPS2/TNFSF12/PSMB8/CCDC3/MAP3K5/PSMC6/ADAMTS12/SFRP1/PSMA6/LAPTM5/NKX3-1/TXNDC17/CLDN1/CASP1/CASP8/GBP2/PSMA7/PSMA1/CD58/PID1/TRAF4/HYAL2	43
BP	GO:0071222	cellular response to lipopolysaccharide	33/1079	197/18862	2.47005e-08	1.11975e-05	8.60617e-06	CSF3/CXCL5/CXCL6/CXCL8/TNIP3/TLR4/IL1B/CARD16/IL6/CXCL1/CSF2/CXCL2/IL18/IL24/CXCL3/IL1A/TLR2/WNT5A/ZC3H12A/ASS1/PTPN22/NFKBIA/CCL2/CD14/TRIB1/PABPN1/IRAK2/CEBPB/TNFAIP3/PDE4B/CASP1/SIGIRR/IRF3	33
BP	GO:0002237	response to molecule of bacterial origin	47/1079	346/18862	3.12386e-08	1.25309e-05	9.63094e-06	CSF3/CXCL5/CXCL6/GGT5/PTGES/INAVA/CXCL8/TNIP3/TLR4/IL1B/CARD16/IL6/CXCL1/CSF2/CXCL2/IL18/IL24/GGT1/CXCL3/IL1A/TLR2/WNT5A/ZC3H12A/ASS1/PTPN22/SOD2/NFKBIA/CCL2/CD14/TRIB1/PABPN1/IRAK2/CEBPB/TNFAIP3/TLR6/PTGIR/PDE4B/PTGER4/CLDN1/DUSP10/CASP1/SNCA/F2R/CASP8/SIGIRR/IRF3/TRIM6	47
BP	GO:0071219	cellular response to molecule of bacterial origin	34/1079	209/18862	3.22486e-08	1.25309e-05	9.63094e-06	CSF3/CXCL5/CXCL6/CXCL8/TNIP3/TLR4/IL1B/CARD16/IL6/CXCL1/CSF2/CXCL2/IL18/IL24/CXCL3/IL1A/TLR2/WNT5A/ZC3H12A/ASS1/PTPN22/NFKBIA/CCL2/CD14/TRIB1/PABPN1/IRAK2/CEBPB/TNFAIP3/TLR6/PDE4B/CASP1/SIGIRR/IRF3	34
BP	GO:0032496	response to lipopolysaccharide	45/1079	326/18862	3.77913e-08	1.37056e-05	1.05338e-05	CSF3/CXCL5/CXCL6/GGT5/PTGES/CXCL8/TNIP3/TLR4/IL1B/CARD16/IL6/CXCL1/CSF2/CXCL2/IL18/IL24/GGT1/CXCL3/IL1A/TLR2/WNT5A/ZC3H12A/ASS1/PTPN22/SOD2/NFKBIA/CCL2/CD14/TRIB1/PABPN1/IRAK2/CEBPB/TNFAIP3/PTGIR/PDE4B/PTGER4/CLDN1/DUSP10/CASP1/SNCA/F2R/CASP8/SIGIRR/IRF3/TRIM6	45
BP	GO:2000379	positive regulation of reactive oxygen species metabolic process	22/1079	101/18862	4.57214e-08	1.49676e-05	1.15037e-05	AKR1C3/F2RL1/TLR4/IL1B/PTK2B/PTX3/ZC3H12A/ITGAM/XDH/ASS1/NOX4/SOD2/THBS1/ROMO1/TLR6/TGFBR2/PTGS2/SNCA/CYBA/P2RX4/PID1/PARK7	22
BP	GO:0061138	morphogenesis of a branching epithelium	30/1079	173/18862	4.76076e-08	1.49676e-05	1.15037e-05	GREM1/TIE1/PAX8/NOTCH4/TGM2/WNT5A/MMP14/TBX3/HOXA5/LHX1/NRP1/GDNF/KDR/NFATC4/SPINT2/NOG/EDNRA/TGFBR2/SFRP1/HOXB13/NKX3-1/SPRY2/SOX9/HHIP/FOXA1/FGF2/LAMA5/LAMA1/PML/SPINT1	30
BP	GO:0043405	regulation of MAP kinase activity	43/1079	307/18862	4.95252e-08	1.49676e-05	1.15037e-05	TRIB2/TENM1/INAVA/TLR4/IL1B/FLT1/PTK2B/DUSP4/CD74/WNT5A/DUSP6/PTPN22/THBS1/LPAR3/APOE/TRIB1/ITGA1/ADAM8/DUSP5/IRAK2/GPS2/TLR6/MAP3K5/SPRY4/SFRP1/SPRY2/SH2B3/DUSP10/PDGFC/FGF2/PAK3/ADORA2B/AJUBA/MAP2K3/IGFBP6/RGS14/NRG1/MAP4K5/MLKL/MAP4K2/ERP29/HYAL2/ERN1	43
BP	GO:0002573	myeloid leukocyte differentiation	33/1079	204/18862	5.88748e-08	1.56341e-05	1.2016e-05	CSF3/F2RL1/DHRS2/TLR4/INHBA/GPR68/CSF2/CD74/CSF1R/OSCAR/MMP9/TLR2/SH3PXD2A/GATA3/NRROS/BATF3/TRIB1/IL31RA/CEBPB/TGFBR2/SFRP1/PIK3CD/FADD/ITGB8/LIF/PRXL2A/CASP8/RELB/SRP54/TSPAN2/IL15/RASSF2/IRF7	33
BP	GO:0045766	positive regulation of angiogenesis	30/1079	175/18862	6.21723e-08	1.56341e-05	1.2016e-05	C3/CXCL8/IL1B/GREM1/FLT1/PTK2B/TIE1/IL1A/WNT5A/ZC3H12A/ANGPTL4/RAPGEF3/HMGA2/BMPER/PGF/THBS1/EMC10/KDR/TNFSF12/TGFBR2/PIK3CD/ITGB8/JCAD/FGF2/JUP/RHOB/RRAS/CYP1B1/VEGFB/ANXA3	30
BP	GO:1904018	positive regulation of vasculature development	30/1079	175/18862	6.21723e-08	1.56341e-05	1.2016e-05	C3/CXCL8/IL1B/GREM1/FLT1/PTK2B/TIE1/IL1A/WNT5A/ZC3H12A/ANGPTL4/RAPGEF3/HMGA2/BMPER/PGF/THBS1/EMC10/KDR/TNFSF12/TGFBR2/PIK3CD/ITGB8/JCAD/FGF2/JUP/RHOB/RRAS/CYP1B1/VEGFB/ANXA3	30
BP	GO:1903131	mononuclear cell differentiation	52/1079	411/18862	6.32262e-08	1.56341e-05	1.2016e-05	IL18R1/F2RL1/DHRS2/IL1B/INHBA/TRPM2/IL6/GPR68/CSF2/PTK2B/IL18/VNN1/CD74/CSF1R/CYP26B1/IL1A/PRDM1/IL11/ZC3H12A/GATA3/MMP14/SOCS1/SPN/PTPN22/LFNG/BATF3/PPP2R3C/ADAM8/IL31RA/CEBPB/NFATC2/GPS2/LOXL3/TGFBR2/SFRP1/PIK3CD/FADD/MERTK/ITGB8/PTGER4/IL7/IL7R/DUSP10/FZD9/TCF7/RELB/SMAD7/BAD/NFKBIZ/HLX/IL15/IRF7	52
BP	GO:0006979	response to oxidative stress	54/1079	444/18862	1.32096e-07	3.12435e-05	2.4013e-05	AKR1C3/PTGS1/DHRS2/TLR4/TRPM2/IL6/PTK2B/WNT16/VNN1/MMP9/GPR37L1/ZC3H12A/GPX3/MMP14/PTPRN/NOX4/SOD2/PSMB5/APOE/ROMO1/PLK3/MMP2/TNFAIP3/TLR6/MAP3K5/NQO1/PRDX5/ATP13A2/PINK1/PTGS2/IDH1/RHOB/SNCA/CPEB2/PML/GCLM/CYP1B1/NDUFA12/CLN8/PTPRK/CYBA/XRCC1/BAD/RGS14/APEX1/PPIF/NET1/FUT8/PARK7/HTRA2/ERO1A/HYAL2/ERN1/EIF2S1	54
BP	GO:1901342	regulation of vasculature development	45/1079	341/18862	1.44277e-07	3.27027e-05	2.51345e-05	C3/CXCL8/IL1B/GREM1/IL6/FLT1/PTK2B/TIE1/ENPP2/IL1A/ISM1/WNT5A/ZC3H12A/ANGPTL4/RAPGEF3/HMGA2/GPR4/BMPER/PGF/THBS1/HOXA5/EMC10/HTATIP2/KDR/TNFAIP3/ID1/TNFSF12/SEMA6A/EFNA1/VASH1/TGFBR2/SFRP1/PIK3CD/ADGRB2/ITGB8/SPRY2/JCAD/FGF2/JUP/RHOB/RRAS/PML/CYP1B1/VEGFB/ANXA3	45
BP	GO:0001706	endoderm formation	15/1079	53/18862	1.67163e-07	3.63747e-05	2.79567e-05	INHBA/SOX7/DUSP4/MMP9/HMGA2/LAMB3/MMP14/COL7A1/LHX1/MMP2/ITGA7/DUSP5/NOG/LAMB1/ITGB5	15
BP	GO:0010631	epithelial cell migration	46/1079	357/18862	2.13157e-07	4.45989e-05	3.42776e-05	PRSS3/DPP4/GREM1/PTK2B/ENPP2/MMP9/KRT16/SH3BP1/PLPP3/STC1/WNT5A/ZC3H12A/LPXN/GATA3/BMPER/S100A2/NRP2/ITGA2/THBS1/SRPX2/PTPRR/APOE/RAB13/NRP1/EMC10/KDR/ID1/TNFSF12/EFNA1/VASH1/TGFBR2/ARF6/PIK3CD/FAP/SOX9/JCAD/DUSP10/FGF2/PTGS2/JUP/RHOB/RRAS/CYP1B1/MAP2K3/P2RX4/ANXA3	46
BP	GO:0045765	regulation of angiogenesis	44/1079	335/18862	2.26858e-07	4.57078e-05	3.51299e-05	C3/CXCL8/IL1B/GREM1/IL6/FLT1/PTK2B/TIE1/ENPP2/IL1A/ISM1/WNT5A/ZC3H12A/ANGPTL4/RAPGEF3/HMGA2/GPR4/BMPER/PGF/THBS1/HOXA5/EMC10/HTATIP2/KDR/TNFAIP3/TNFSF12/SEMA6A/EFNA1/VASH1/TGFBR2/SFRP1/PIK3CD/ADGRB2/ITGB8/SPRY2/JCAD/FGF2/JUP/RHOB/RRAS/PML/CYP1B1/VEGFB/ANXA3	44
BP	GO:0001763	morphogenesis of a branching structure	30/1079	186/18862	2.4893e-07	4.83636e-05	3.71711e-05	GREM1/TIE1/PAX8/NOTCH4/TGM2/WNT5A/MMP14/TBX3/HOXA5/LHX1/NRP1/GDNF/KDR/NFATC4/SPINT2/NOG/EDNRA/TGFBR2/SFRP1/HOXB13/NKX3-1/SPRY2/SOX9/HHIP/FOXA1/FGF2/LAMA5/LAMA1/PML/SPINT1	30
BP	GO:2001233	regulation of apoptotic signaling pathway	45/1079	348/18862	2.60377e-07	4.88431e-05	3.75396e-05	SRPX/G0S2/IL1B/INHBA/CSF2/TIMP3/VNN1/CD74/MMP9/IL1A/CXCL12/IFI6/SOD2/THBS1/BMF/RPL26/GDNF/NFATC4/TNFAIP3/TNFSF12/BCL2L2/NOG/MAGEA3/SFRP1/FADD/LGALS3/NKX3-1/IL7/PINK1/FZD9/PMAIP1/PML/GCLM/CASP8/BAD/FIS1/ITM2C/PPIF/PARK7/HTRA2/ING5/SNAI1/ERP29/TRIM39/HYAL2	45
BP	GO:0090132	epithelium migration	46/1079	360/18862	2.72352e-07	4.93865e-05	3.79573e-05	PRSS3/DPP4/GREM1/PTK2B/ENPP2/MMP9/KRT16/SH3BP1/PLPP3/STC1/WNT5A/ZC3H12A/LPXN/GATA3/BMPER/S100A2/NRP2/ITGA2/THBS1/SRPX2/PTPRR/APOE/RAB13/NRP1/EMC10/KDR/ID1/TNFSF12/EFNA1/VASH1/TGFBR2/ARF6/PIK3CD/FAP/SOX9/JCAD/DUSP10/FGF2/PTGS2/JUP/RHOB/RRAS/CYP1B1/MAP2K3/P2RX4/ANXA3	46
BP	GO:0031349	positive regulation of defense response	46/1079	361/18862	2.95294e-07	5.18194e-05	3.98271e-05	F2RL1/C3/KLRC2/TLR4/IL1B/IL6/IL18/TLR2/TGM2/WNT5A/PSMB9/GPR4/PSME2/ITGA2/IKBKE/NFKBIA/PSMB5/ZP3/TNIP1/GPSM3/ADAM8/PSME1/PSMB10/CEBPB/PSMB8/PSMC6/PSMA6/FADD/PTGER4/GBP5/PTGS2/SNCA/PAK3/NPAS2/PQBP1/RELB/PSMA7/CYBA/PSMA1/IRF3/TRIM6/NFKBIZ/IL15/PARK7/IRF7/HYAL2	46
BP	GO:0090130	tissue migration	46/1079	365/18862	4.06456e-07	6.90975e-05	5.31067e-05	PRSS3/DPP4/GREM1/PTK2B/ENPP2/MMP9/KRT16/SH3BP1/PLPP3/STC1/WNT5A/ZC3H12A/LPXN/GATA3/BMPER/S100A2/NRP2/ITGA2/THBS1/SRPX2/PTPRR/APOE/RAB13/NRP1/EMC10/KDR/ID1/TNFSF12/EFNA1/VASH1/TGFBR2/ARF6/PIK3CD/FAP/SOX9/JCAD/DUSP10/FGF2/PTGS2/JUP/RHOB/RRAS/CYP1B1/MAP2K3/P2RX4/ANXA3	46
BP	GO:0050727	regulation of inflammatory response	46/1079	366/18862	4.39818e-07	7.06906e-05	5.43311e-05	C3/AOAH/PTGES/TLR4/IL1B/IL6/IL18/MMP9/GGT1/TLR2/TGM2/WNT5A/SEMA7A/GATA3/LRFN5/GPR4/NT5E/ITGA2/ADORA1/NFKBIA/ZP3/TNIP1/APOE/GPSM3/ADAM8/CEBPB/TNFAIP3/GPS2/ADAMTS12/PSMA6/IL1R1/MGLL/PTGER4/SYT11/DUSP10/PTGS2/CASP1/SNCA/PSMA1/LACC1/IRF3/NFKBIZ/IL15/NLRP1/PARK7/HYAL2	46
BP	GO:0001667	ameboidal-type cell migration	55/1079	473/18862	4.41816e-07	7.06906e-05	5.43311e-05	PRSS3/DPP4/GREM1/PTK2B/ENPP2/MMP9/KRT16/SH3BP1/PLPP3/STC1/WNT5A/ZC3H12A/SEMA7A/LPXN/GATA3/BMPER/S100A2/TIMP1/NRP2/ITGA2/THBS1/SRPX2/PTPRR/APOE/RAB13/NRP1/GDNF/EMC10/KDR/ID1/TNFSF12/SEMA6A/EFNA1/VASH1/TGFBR2/ARF6/PIK3CD/FAP/SOX9/JCAD/DUSP10/FGF2/PTGS2/LAMA5/JUP/RHOB/PAK3/RRAS/PML/CYP1B1/MAP2K3/P2RX4/ANXA6/ANXA3/HYAL2	55
BP	GO:0071216	cellular response to biotic stimulus	34/1079	233/18862	4.6915e-07	7.12163e-05	5.47352e-05	CSF3/CXCL5/CXCL6/CXCL8/TNIP3/TLR4/IL1B/CARD16/IL6/CXCL1/CSF2/CXCL2/IL18/IL24/CXCL3/IL1A/TLR2/WNT5A/ZC3H12A/ASS1/PTPN22/NFKBIA/CCL2/CD14/TRIB1/PABPN1/IRAK2/CEBPB/TNFAIP3/TLR6/PDE4B/CASP1/SIGIRR/IRF3	34
BP	GO:0045862	positive regulation of proteolysis	46/1079	367/18862	4.75734e-07	7.12163e-05	5.47352e-05	TRIB2/TNFSF15/IL1B/SOX7/PTK2B/CLDN3/ZC3H12A/XDH/MMP14/PSME2/TNIP1/APOE/TRIB1/ADAM8/PLK3/PSME1/FGFR4/EFNA1/HSPE1/MAP3K5/FADD/PSENEN/LAPTM5/NKX3-1/PINK1/PLGRKT/TBC1D10A/CASP1/RCHY1/SNCA/PCOLCE/PMAIP1/PDCD5/PML/F2R/CASP8/APH1B/DDRGK1/SMAD7/BAD/FIS1/HECTD1/PACSIN3/DNAJB2/NLRP1/HTRA2	46
BP	GO:0002687	positive regulation of leukocyte migration	24/1079	133/18862	4.84376e-07	7.12163e-05	5.47352e-05	F2RL1/RARRES2/CXCL8/IL6/PTK2B/CD74/CSF1R/WNT5A/CXCL12/CCL7/MMP14/SPN/PGF/ITGA2/THBS1/ZP3/GPSM3/ADAM8/IL1R1/FADD/LGALS3/VEGFB/TMEM102/P2RX4	24
BP	GO:0048754	branching morphogenesis of an epithelial tube	25/1079	143/18862	5.24828e-07	7.51332e-05	5.77456e-05	GREM1/TIE1/PAX8/NOTCH4/WNT5A/MMP14/TBX3/HOXA5/LHX1/NRP1/GDNF/KDR/NFATC4/NOG/EDNRA/TGFBR2/NKX3-1/SPRY2/SOX9/HHIP/FOXA1/FGF2/LAMA5/LAMA1/PML	25
BP	GO:0062197	cellular response to chemical stress	44/1079	347/18862	6.10821e-07	8.52017e-05	6.54839e-05	AKR1C3/DHRS2/TLR4/TRPM2/IL6/WNT16/VNN1/MMP9/AKR1B1/GPR37L1/ZC3H12A/GPX3/NOX4/SOD2/ROMO1/MMP2/TNFAIP3/TLR6/MAP3K5/NQO1/PRDX5/LRRC8C/ATP13A2/PINK1/RHOB/SNCA/CPEB2/PML/CYP1B1/RELB/PTPRK/CYBA/CAB39/BAD/APEX1/MBIP/PPIF/NET1/FUT8/PARK7/HTRA2/ERO1A/ERN1/EIF2S1	44
BP	GO:0038061	NIK/NF-kappaB signaling	29/1079	185/18862	7.24218e-07	9.60913e-05	7.38535e-05	IL18R1/TLR4/TNFSF15/IL1B/GREM1/IL18/TLR2/ZC3H12A/TCIM/PSMB9/PSME2/PTPN22/IKBKE/NFKBIA/PSMB5/CD14/PSME1/PSMB10/TLR6/PSMB8/PSMC6/PSMA6/LAPTM5/TSPAN6/RELB/PSMA7/PSMA1/RASSF2/TRAF4	29
BP	GO:0051216	cartilage development	29/1079	185/18862	7.24218e-07	9.60913e-05	7.38535e-05	LUM/CYTL1/GREM1/PTHLH/STC1/WNT5A/SOX5/HMGA2/CSGALNACT1/TIMP1/HOXA5/SLC39A14/NKX3-2/NOG/PRRX1/TGFBR2/ADAMTS12/CHST11/ITGB8/SOX9/WNT7B/FGF2/RUNX2/LTBP3/DDRGK1/SMAD7/ANXA6/SNAI1/HYAL2	29
BP	GO:0097529	myeloid leukocyte migration	32/1079	218/18862	8.86469e-07	0.000114819	8.8247e-05	RARRES2/CXCL5/DPP4/CXCL6/CXCL8/PECAM1/GREM1/IL6/FLT1/CXCL1/PTK2B/CXCL2/CD74/CSF1R/CXCL3/CXCL12/CCL7/MMP14/PGF/THBS1/CCL2/ITGA1/ADAM8/IL1R1/PIK3CD/LGALS3/PDE4B/PTGER4/NBL1/VEGFB/SRP54/P2RX4	32
BP	GO:0022407	regulation of cell-cell adhesion	51/1079	437/18862	1.0369e-06	0.000128913	9.90796e-05	DPP4/SERPINF2/IL1B/IL6/IL18/VNN1/CD74/NOTCH4/IL1A/PLPP3/C1QTNF1/WNT5A/ZC3H12A/CXCL12/GATA3/ASS1/SOCS1/SPN/PTPN22/CCDC88B/ICOSLG/EBI3/PTPRU/CCL2/ZP3/ADAM8/TNFRSF21/CEBPB/SPINT2/LOXL3/TGFBR2/FADD/LGALS3/LAPTM5/SH2B3/IL7/IL7R/DUSP10/ANK3/ARG2/FOXA1/SERPINE2/PAK3/SMAD7/BAD/HLA-A/NFKBIZ/HES1/HLX/IL15/F11R	51
BP	GO:0045785	positive regulation of cell adhesion	50/1079	425/18862	1.04268e-06	0.000128913	9.90796e-05	DPP4/SERPINF2/IL1B/IL6/PTK2B/IL18/VNN1/CD74/COL16A1/IL1A/PLPP3/TGM2/WNT5A/CXCL12/GATA3/SOCS1/ITGA2/PTPN22/CCDC88B/ICOSLG/EBI3/PTPRU/CCL2/ZP3/ADAM8/NRP1/KDR/FMN1/UNC13D/TGFBR2/SFRP1/FADD/IL7/IL7R/DUSP10/ANK3/FOXA1/LIF/JUP/PAK3/RRAS/SMAD7/BAD/HLA-A/NFKBIZ/HES1/HLX/IL15/F11R/TMEM102	50
BP	GO:0002720	positive regulation of cytokine production involved in immune response	14/1079	53/18862	1.08792e-06	0.000131517	0.000101081	IL18R1/F2RL1/TLR4/IL1B/IL6/IL18/CD74/WNT5A/SEMA7A/GATA3/IL1R1/LAPTM5/TRIM6/HLA-A	14
BP	GO:0048762	mesenchymal cell differentiation	33/1079	231/18862	1.1216e-06	0.000132642	0.000101945	IL1B/GREM1/IL6/WNT16/S100A4/NOTCH4/WNT5A/SEMA7A/HMGA2/GATA3/NRP2/NRP1/GDNF/NOG/SEMA6A/EFNA1/LOXL3/EDNRA/TGFBR2/SFRP1/SPRY2/SOX9/FOXA1/LAMA5/DACT3/SDHAF2/ADAM15/SMAD7/HES1/NRG1/ANXA6/SNAI1/TGFBR3	33
BP	GO:0050673	epithelial cell proliferation	50/1079	428/18862	1.28285e-06	0.000147144	0.000113091	EHF/TLR4/IL6/FLT1/WNT16/TIE1/VDR/WNT5A/CXCL12/GATA3/XDH/BMPER/MMP14/PTPRN/COL8A2/PGF/NRP2/THBS1/CCL2/APOE/HOXA5/NRP1/EMC10/KDR/CEBPB/TNFAIP3/ID1/TNFSF12/NOG/IGFBP4/VASH1/SFRP1/PIK3CD/NKX3-1/FAP/SOX9/TINF2/CLDN1/JCAD/DUSP10/FGF2/LAMB1/VEGFB/PTPRK/BAD/HES1/SAV1/TGFBR3/ERN1/NKX6-1	50
BP	GO:0032609	interferon-gamma production	21/1079	112/18862	1.29833e-06	0.000147144	0.000113091	IL18R1/F2RL1/TLR4/IL1B/INHBA/IL18/PDE4D/WNT5A/ZC3H12A/GATA3/SPN/PTPN22/EBI3/ZP3/CD14/IL1R1/FADD/LAPTM5/PDE4B/ISG15/HLA-A	21
BP	GO:0030225	macrophage differentiation	13/1079	47/18862	1.48614e-06	0.000161832	0.00012438	INHBA/CSF2/CSF1R/MMP9/TLR2/NRROS/TRIB1/IL31RA/FADD/LIF/CASP8/TSPAN2/IL15	13
BP	GO:0043542	endothelial cell migration	37/1079	278/18862	1.48743e-06	0.000161832	0.00012438	PRSS3/DPP4/GREM1/PTK2B/SH3BP1/PLPP3/STC1/WNT5A/ZC3H12A/LPXN/GATA3/BMPER/S100A2/NRP2/THBS1/SRPX2/APOE/RAB13/NRP1/EMC10/KDR/ID1/TNFSF12/EFNA1/VASH1/PIK3CD/FAP/JCAD/FGF2/PTGS2/JUP/RHOB/RRAS/CYP1B1/MAP2K3/P2RX4/ANXA3	37
BP	GO:0050729	positive regulation of inflammatory response	23/1079	133/18862	1.80016e-06	0.000192017	0.00014758	C3/TLR4/IL1B/IL6/IL18/TLR2/TGM2/WNT5A/GPR4/ITGA2/NFKBIA/ZP3/TNIP1/GPSM3/ADAM8/CEBPB/PTGER4/PTGS2/SNCA/NFKBIZ/IL15/PARK7/HYAL2	23
BP	GO:0038084	vascular endothelial growth factor signaling pathway	13/1079	48/18862	1.93208e-06	0.000195337	0.000150131	FLT1/XDH/PGF/NRP2/NRP1/KDR/SEMA6A/PIK3CD/SPRY2/JCAD/VEGFB/ADAMTS3/CD63	13
BP	GO:2001238	positive regulation of extrinsic apoptotic signaling pathway	13/1079	48/18862	1.93208e-06	0.000195337	0.000150131	SRPX/G0S2/INHBA/TIMP3/THBS1/TNFSF12/SFRP1/FADD/PMAIP1/PML/ITM2C/HTRA2/HYAL2	13
BP	GO:0050863	regulation of T cell activation	41/1079	327/18862	1.95995e-06	0.000195337	0.000150131	DPP4/IL1B/IL6/IL18/VNN1/CD74/CYP26B1/IL1A/PRDM1/ZC3H12A/GATA3/SOCS1/SPN/PTPN22/CCDC88B/ICOSLG/EBI3/CCL2/ZP3/ADAM8/TNFRSF21/CEBPB/NFATC2/LOXL3/TGFBR2/FADD/LGALS3/LAPTM5/IL7/IL7R/DUSP10/ARG2/TCF7/PAK3/SMAD7/BAD/HLA-A/NFKBIZ/HES1/HLX/IL15	41
BP	GO:0030595	leukocyte chemotaxis	32/1079	226/18862	1.97491e-06	0.000195337	0.000150131	F2RL1/RARRES2/CXCL5/DPP4/CXCL6/CXCL8/GREM1/TRPM2/IL6/FLT1/CXCL1/PTK2B/CXCL2/CD74/CSF1R/CXCL3/WNT5A/CXCL12/CCL7/PGF/THBS1/CCL2/GPSM3/ITGA1/ADAM8/PIK3CD/LGALS3/PDE4B/NBL1/VEGFB/SRP54/TMEM102	32
BP	GO:0002685	regulation of leukocyte migration	30/1079	205/18862	2.05755e-06	0.000198779	0.000152777	F2RL1/RARRES2/DPP4/CXCL8/GREM1/IL6/PTK2B/CD74/CSF1R/WNT5A/CXCL12/CCL7/MMP14/SPN/PGF/ITGA2/THBS1/ADORA1/CCL2/ZP3/GPSM3/ADAM8/IL1R1/FADD/LGALS3/PTGER4/NBL1/VEGFB/TMEM102/P2RX4	30
BP	GO:0007229	integrin-mediated signaling pathway	20/1079	106/18862	2.08491e-06	0.000198779	0.000152777	PTK2B/COL16A1/ITGA11/PLPP3/SEMA7A/ITGAM/TIMP1/ITGA2/ITGA1/NRP1/ITGA7/LOXL3/FYB1/ITGB8/ISG15/LAMA5/ADAM15/ITGB5/FUT8/CD63	20
BP	GO:0032147	activation of protein kinase activity	41/1079	328/18862	2.11933e-06	0.000198779	0.000152777	INAVA/TLR4/TNFSF15/IL1B/GREM1/PTK2B/IL18/CD74/WNT5A/NRK/DUSP6/SOCS1/THBS1/ADORA1/LPAR3/PRLR/PPP2R3C/ITGA1/DUSP5/IRAK2/TLR6/MAP3K5/ADRB2/TGFBR2/PDGFC/PINK1/FGF2/PAK3/ADORA2B/F2R/MAP2K3/IGFBP6/CAB39/NRG1/MAP4K5/PARK7/TRAF4/MLKL/MAP4K2/ERP29/ERN1	41
BP	GO:0060326	cell chemotaxis	39/1079	306/18862	2.31812e-06	0.000209592	0.000161087	F2RL1/RARRES2/CXCL5/DPP4/CXCL6/CXCL8/GREM1/TRPM2/IL6/FLT1/CXCL1/PTK2B/CXCL2/CD74/CSF1R/CXCL3/WNT5A/CXCL12/CCL7/PGF/THBS1/CCL2/GPSM3/ITGA1/ADAM8/RAB13/NRP1/KDR/PIK3CD/LGALS3/ARHGEF16/PDE4B/DOCK4/NBL1/FGF2/VEGFB/SRP54/TMEM102/P2RX4	39
BP	GO:0035924	cellular response to vascular endothelial growth factor stimulus	16/1079	72/18862	2.3298e-06	0.000209592	0.000161087	FLT1/XDH/PGF/NRP2/NRP1/KDR/SEMA6A/ADAMTS12/PIK3CD/SPRY2/JCAD/VEGFB/MAP2K3/ADAMTS3/CD63/ERN1	16
BP	GO:0062012	regulation of small molecule metabolic process	50/1079	437/18862	2.3502e-06	0.000209592	0.000161087	AKR1C3/MID1IP1/IL1B/PTK2B/GIP/CD74/APOC1/C1QTNF1/RUBCNL/P2RY6/CDA/PSMB9/SLC7A7/DGAT2/PSME2/PSMB5/IRS1/APOE/PSME1/PSMB10/FGFR4/PHLDA2/PSMB8/IGFBP4/INSIG1/PSMC6/NQO1/PSMA6/PPP1R3F/MFSD2A/SOX9/CYP51A1/PINK1/PMVK/PTGS2/FAM3C/SQLE/SNCA/PMAIP1/HMGCS1/IDI1/PGP/PSMA7/PSMA1/LACC1/BAD/SLC2A6/PID1/PARK7/SNAI1	50
BP	GO:2001235	positive regulation of apoptotic signaling pathway	22/1079	126/18862	2.5445e-06	0.000223259	0.000171591	SRPX/G0S2/INHBA/TIMP3/THBS1/BMF/RPL26/NFATC4/TNFSF12/SFRP1/FADD/NKX3-1/PMAIP1/PML/BAD/FIS1/ITM2C/PARK7/HTRA2/ING5/TRIM39/HYAL2	22
BP	GO:0007159	leukocyte cell-cell adhesion	44/1079	366/18862	2.59703e-06	0.000224251	0.000172354	DPP4/PECAM1/IL1B/IL6/IL18/VNN1/CD74/IL1A/ZC3H12A/CXCL12/GATA3/NT5E/ASS1/SOCS1/SPN/PTPN22/CCDC88B/ICOSLG/EBI3/CCL2/ZP3/TNIP1/ADAM8/OLR1/TNFRSF21/CEBPB/LOXL3/TGFBR2/FADD/LGALS3/LAPTM5/IL7/IL7R/DUSP10/ARG2/PAK3/SMAD7/BAD/HLA-A/NFKBIZ/HES1/HLX/IL15/F11R	44
BP	GO:0022409	positive regulation of cell-cell adhesion	36/1079	276/18862	3.2955e-06	0.000274755	0.00021117	DPP4/SERPINF2/IL1B/IL6/IL18/VNN1/CD74/IL1A/PLPP3/WNT5A/GATA3/SOCS1/PTPN22/CCDC88B/ICOSLG/EBI3/PTPRU/CCL2/ZP3/ADAM8/TGFBR2/FADD/IL7/IL7R/DUSP10/ANK3/FOXA1/PAK3/SMAD7/BAD/HLA-A/NFKBIZ/HES1/HLX/IL15/F11R	36
BP	GO:0031098	stress-activated protein kinase signaling cascade	36/1079	276/18862	3.2955e-06	0.000274755	0.00021117	F2RL1/INAVA/SERPINF2/TLR4/IL1B/PTK2B/WNT16/AKR1B1/DUSP15/WNT5A/ZC3H12A/NRK/XDH/SH3RF3/PTPN22/TRIB1/EMC10/IRAK2/GPS2/MAP3K5/SFRP1/PTGER4/DUSP10/WNT7B/PINK1/PAK3/ADORA2B/DACT1/MAP2K3/MBIP/RASSF2/MAP4K5/TRAF4/MLKL/MAP4K2/ERN1	36
BP	GO:0034599	cellular response to oxidative stress	38/1079	299/18862	3.33342e-06	0.000274755	0.00021117	AKR1C3/DHRS2/TLR4/TRPM2/IL6/WNT16/VNN1/MMP9/GPR37L1/ZC3H12A/GPX3/NOX4/SOD2/ROMO1/MMP2/TNFAIP3/TLR6/MAP3K5/NQO1/PRDX5/ATP13A2/PINK1/RHOB/SNCA/CPEB2/PML/CYP1B1/PTPRK/CYBA/APEX1/PPIF/NET1/FUT8/PARK7/HTRA2/ERO1A/ERN1/EIF2S1	38
BP	GO:0042180	cellular ketone metabolic process	34/1079	254/18862	3.44552e-06	0.000276752	0.000212705	AKR1C3/KYNU/MID1IP1/CYP11A1/IL1B/GIP/CD74/APOC1/AKR1B1/PSMB9/SLC7A7/DGAT2/PSME2/PSMB5/IRS1/PSME1/PSMB10/FGFR4/PSMB8/INSIG1/DHRS4/PSMC6/NQO1/PSMA6/MFSD2A/SOX9/PTGS2/COQ6/PSMA7/PSMA1/PARK7/COQ5/PNKD/AKR1A1	34
BP	GO:0061448	connective tissue development	33/1079	243/18862	3.48414e-06	0.000276752	0.000212705	LUM/CYTL1/GREM1/PTHLH/SERPINB7/STC1/WNT5A/SOX5/HMGA2/GPR4/CSGALNACT1/DGAT2/TIMP1/HOXA5/SLC39A14/NKX3-2/NOG/PRRX1/TGFBR2/ADAMTS12/CHST11/ITGB8/SOX9/WNT7B/FOXA1/FGF2/RUNX2/LTBP3/DDRGK1/SMAD7/ANXA6/SNAI1/HYAL2	33
BP	GO:0031663	lipopolysaccharide-mediated signaling pathway	14/1079	58/18862	3.51027e-06	0.000276752	0.000212705	TLR4/IL1B/CARD16/IL18/TLR2/PTPN22/NFKBIA/CCL2/CD14/TRIB1/IRAK2/TNFAIP3/SIGIRR/IRF3	14
BP	GO:0010952	positive regulation of peptidase activity	29/1079	200/18862	3.65229e-06	0.000283835	0.000218149	TNFSF15/SOX7/CLDN3/XDH/PSME2/PSME1/EFNA1/HSPE1/MAP3K5/FADD/PSENEN/LAPTM5/NKX3-1/PINK1/TBC1D10A/CASP1/SNCA/PCOLCE/PMAIP1/PDCD5/PML/F2R/CASP8/APH1B/DDRGK1/BAD/FIS1/NLRP1/HTRA2	29
BP	GO:0071347	cellular response to interleukin-1	27/1079	180/18862	4.09715e-06	0.000313922	0.000241273	CXCL8/IL1B/IL6/IL1A/ZC3H12A/CCL7/PSMB9/PSME2/NFKBIA/PSMB5/CCL2/PSME1/IRAK2/PSMB10/CEBPB/PSMB8/PSMC6/ADAMTS12/SFRP1/PSMA6/IL1R1/NKX3-1/SOX9/GBP2/PSMA7/PSMA1/HYAL2	27
BP	GO:0042110	T cell activation	52/1079	474/18862	5.08767e-06	0.000384402	0.000295442	IL18R1/F2RL1/DPP4/IL1B/IL6/IL18/VNN1/CD74/CYP26B1/IL1A/PRDM1/ZC3H12A/GATA3/LCP1/SOCS1/SPN/PTPN22/LFNG/CCDC88B/ICOSLG/EBI3/CCL2/ZP3/ADAM8/TNFRSF21/PSMB10/CEBPB/NFATC2/LOXL3/TGFBR2/PIK3CD/FADD/LGALS3/LAPTM5/PTGER4/IL7/IL7R/DUSP10/ARG2/TCF7/FKBP1A/PAK3/CASP8/RELB/SMAD7/BAD/HLA-A/NFKBIZ/HES1/CD151/HLX/IL15	52
BP	GO:0007249	I-kappaB kinase/NF-kappaB signaling	36/1079	282/18862	5.41135e-06	0.000403257	0.000309934	F2RL1/INAVA/TNIP3/TLR4/IL1B/CARD16/CD74/S100A4/TLR2/TGM2/WNT5A/ZC3H12A/APOL3/IKBKE/NFKBIA/TNIP1/CD14/IRAK2/TNFAIP3/TLR6/FADD/PINK1/CASP1/FKBP1A/AJUBA/TSPAN6/F2R/MIB2/CASP8/SLC20A1/RELB/DDRGK1/IRF3/TRIM6/TRAF4/TRIM39	36
BP	GO:0042063	gliogenesis	36/1079	283/18862	5.86694e-06	0.000428524	0.000329353	TLR4/IL1B/IL6/PTK2B/GAP43/SH3TC2/CSF1R/ZNF488/GPR37L1/TLR2/MMP14/PLAG1/NRROS/CCL2/TNFRSF21/NDRG1/NOG/PRDM8/SOX9/MXRA8/DUSP10/DNER/BIN1/METRN/LIF/SERPINE2/LAMB1/PRMT5/FOXG1/ADAM22/MYRF/SPINT1/TSPAN2/HES1/P2RX4/NKX6-1	36
BP	GO:0033238	regulation of cellular amine metabolic process	16/1079	77/18862	5.90796e-06	0.000428524	0.000329353	ITGAM/PSMB9/SLC7A7/PSME2/PSMB5/PSME1/PSMB10/PSMB8/PSMC6/NQO1/PSMA6/PAOX/PSMA7/PSMA1/PARK7/PNKD	16
BP	GO:0060337	type I interferon signaling pathway	18/1079	95/18862	6.27295e-06	0.000449012	0.000345099	OASL/ISG20/OAS2/WNT5A/MX2/IFI6/IKBKE/IFIT2/PSMB8/FADD/IFIT3/ISG15/IFIT1/GBP2/IRF3/TRIM6/HLA-A/IRF7	18
BP	GO:0033209	tumor necrosis factor-mediated signaling pathway	26/1079	174/18862	6.59432e-06	0.000465885	0.000358068	F2RL1/TNFSF15/CARD16/PTK2B/PSMB9/LTB/PSME2/NFKBIA/PSMB5/TNFRSF11B/PSME1/PSMB10/TNFAIP3/GPS2/TNFSF12/PSMB8/CCDC3/PSMC6/PSMA6/LAPTM5/TXNDC17/CASP1/CASP8/PSMA7/PSMA1/TRAF4	26
BP	GO:0071900	regulation of protein serine/threonine kinase activity	53/1079	492/18862	7.01513e-06	0.000474812	0.000364929	TRIB2/TENM1/INAVA/TLR4/IL1B/FLT1/PTK2B/DUSP4/CD74/CSF1R/WNT5A/TCIM/HMGA2/DUSP6/CCNB3/PTPN22/THBS1/LPAR3/APOE/TRIB1/ITGA1/ADAM8/DUSP5/IRAK2/TNFAIP3/GPS2/TLR6/MAP3K5/SPRY4/ADRB2/SFRP1/SPRY2/PKIA/SH2B3/DUSP10/PDGFC/FGF2/SNCA/PAK3/ADORA2B/AJUBA/MAP2K3/IGFBP6/CAB39/RGS14/CCNA1/NRG1/MAP4K5/MLKL/MAP4K2/ERP29/HYAL2/ERN1	53
BP	GO:0048863	stem cell differentiation	33/1079	251/18862	7.04241e-06	0.000474812	0.000364929	OCIAD2/GREM1/MEOX1/SHC4/SOX5/SEMA7A/HMGA2/GATA3/PSMB9/PSME2/NRP2/PSMB5/NRP1/GDNF/PSME1/PSMB10/SEMA6A/PSMB8/PSMC6/EDNRA/SFRP1/PSMA6/SOX9/FOXA1/LAMA5/LIF/LTBP3/PSMA7/PSMA1/TRIM6/HES1/NRG1/ANXA6	33
BP	GO:2001236	regulation of extrinsic apoptotic signaling pathway	24/1079	154/18862	7.10943e-06	0.000474812	0.000364929	SRPX/G0S2/IL1B/INHBA/CSF2/TIMP3/IL1A/IFI6/THBS1/GDNF/TNFAIP3/TNFSF12/SFRP1/FADD/LGALS3/IL7/PMAIP1/PML/GCLM/CASP8/ITM2C/PARK7/HTRA2/HYAL2	24
BP	GO:0060562	epithelial tube morphogenesis	38/1079	309/18862	7.27452e-06	0.000474812	0.000364929	GREM1/TIE1/CSF1R/PAX8/NOTCH4/WNT5A/CTHRC1/GATA3/MMP14/TBX3/HOXA5/LHX1/NRP1/GDNF/KDR/VANGL2/NFATC4/SPINT2/NOG/FMN1/TCAP/EDNRA/TGFBR2/ADAMTS12/SFRP1/PIK3CD/NKX3-1/SPRY2/SOX9/HHIP/FOXA1/FGF2/LAMA5/RHOB/LAMA1/PML/SPINT1/HES1	38
BP	GO:0071357	cellular response to type I interferon	18/1079	96/18862	7.31331e-06	0.000474812	0.000364929	OASL/ISG20/OAS2/WNT5A/MX2/IFI6/IKBKE/IFIT2/PSMB8/FADD/IFIT3/ISG15/IFIT1/GBP2/IRF3/TRIM6/HLA-A/IRF7	18
BP	GO:0010634	positive regulation of epithelial cell migration	26/1079	175/18862	7.33166e-06	0.000474812	0.000364929	PTK2B/ENPP2/MMP9/PLPP3/WNT5A/ZC3H12A/GATA3/NRP2/ITGA2/THBS1/SRPX2/NRP1/EMC10/KDR/TGFBR2/ARF6/PIK3CD/SOX9/JCAD/FGF2/PTGS2/RHOB/RRAS/MAP2K3/P2RX4/ANXA3	26
BP	GO:0048771	tissue remodeling	26/1079	175/18862	7.33166e-06	0.000474812	0.000364929	TMEM119/GREM1/IL6/PTK2B/WNT16/IL18/TIE1/CSF1R/ELF3/IL1A/TGM2/CTHRC1/MMP14/TIMP1/TNFRSF11B/ADAM8/MMP2/TNFAIP3/ADRB2/SFRP1/IL7/LIF/LTBP3/F2R/IL15/RASSF2	26
BP	GO:0030856	regulation of epithelial cell differentiation	24/1079	156/18862	8.9108e-06	0.000570291	0.000438312	IL1B/MMP9/PAX8/NOTCH4/VDR/GATA3/XDH/TBX3/AQP3/LHX1/ETV4/GDNF/CEBPB/ID1/TRIM16/SPRY2/SOX9/FGF2/LIF/BAD/HES1/MAFF/F11R/NKX6-1	24
BP	GO:0032649	regulation of interferon-gamma production	19/1079	107/18862	9.39763e-06	0.000594455	0.000456884	IL18R1/TLR4/IL1B/INHBA/IL18/PDE4D/WNT5A/ZC3H12A/GATA3/PTPN22/EBI3/ZP3/CD14/IL1R1/FADD/LAPTM5/PDE4B/ISG15/HLA-A	19
BP	GO:1905332	positive regulation of morphogenesis of an epithelium	10/1079	33/18862	9.94348e-06	0.000621753	0.000477865	GREM1/PAX8/GATA3/LHX1/GDNF/NOG/PIK3CD/SOX9/FGF2/LIF	10
BP	GO:0001501	skeletal system development	52/1079	486/18862	1.03408e-05	0.00063222	0.000485909	LUM/TMEM119/CYTL1/GREM1/GPR68/PTHLH/MMP9/CYP26B1/STC1/WNT5A/SOX5/HMGA2/MMP14/CSGALNACT1/TIMP1/TBX3/TNFRSF11B/HOXA5/LHX1/VKORC1/SLC39A14/MMP2/NKX3-2/NOG/PRRX1/FMN1/INSIG1/TGFBR2/ADAMTS12/SFRP1/CHST11/ITGB8/SH2B3/PTGER4/SOX9/HHIP/HAPLN3/PDGFC/WNT7B/FGF2/RUNX2/PAPSS1/LTBP3/CSRNP1/DDRGK1/SMAD7/RASSF2/PHEX/ANXA6/SNAI1/HYAL2/KIAA1217	52
BP	GO:0007254	JNK cascade	27/1079	189/18862	1.03433e-05	0.00063222	0.000485909	F2RL1/SERPINF2/TLR4/IL1B/PTK2B/WNT16/DUSP15/WNT5A/SH3RF3/PTPN22/TRIB1/IRAK2/GPS2/MAP3K5/SFRP1/PTGER4/DUSP10/WNT7B/PINK1/ADORA2B/DACT1/RASSF2/MAP4K5/TRAF4/MLKL/MAP4K2/ERN1	27
BP	GO:1902105	regulation of leukocyte differentiation	35/1079	279/18862	1.07034e-05	0.000646963	0.00049724	TLR4/INHBA/GPR68/IL18/VNN1/CD74/CYP26B1/PRDM1/ZC3H12A/GATA3/MMP14/SOCS1/PPP2R3C/TRIB1/ADAM8/CEBPB/NFATC2/LOXL3/TGFBR2/SFRP1/FADD/IL7/IL7R/DUSP10/LIF/TCF7/PRXL2A/CASP8/SMAD7/BAD/NFKBIZ/HLX/IL15/RASSF2/IRF7	35
BP	GO:0030217	T cell differentiation	32/1079	246/18862	1.20348e-05	0.000719441	0.000552945	IL18R1/IL1B/IL6/IL18/VNN1/CD74/CYP26B1/IL1A/PRDM1/ZC3H12A/GATA3/SOCS1/SPN/PTPN22/LFNG/ADAM8/NFATC2/LOXL3/TGFBR2/PIK3CD/FADD/PTGER4/IL7/IL7R/DUSP10/TCF7/RELB/SMAD7/BAD/NFKBIZ/HLX/IL15	32
BP	GO:0046456	icosanoid biosynthetic process	13/1079	56/18862	1.23505e-05	0.000722436	0.000555247	AKR1C3/PTGS1/GGT5/PTGES/ALOX5AP/IL1B/CD74/GGT1/PLA2G4A/PTGS2/MGST3/FADS1/PRXL2B	13
BP	GO:0060760	positive regulation of response to cytokine stimulus	13/1079	56/18862	1.23505e-05	0.000722436	0.000555247	TLR4/CD74/TLR2/WNT5A/IKBKE/IL1R1/FADD/LAPTM5/IL7/CASP1/IRF3/TRIM6/IRF7	13
BP	GO:1903037	regulation of leukocyte cell-cell adhesion	39/1079	330/18862	1.41605e-05	0.000815749	0.000626965	DPP4/IL1B/IL6/IL18/VNN1/CD74/IL1A/ZC3H12A/CXCL12/GATA3/ASS1/SOCS1/SPN/PTPN22/CCDC88B/ICOSLG/EBI3/CCL2/ZP3/ADAM8/TNFRSF21/CEBPB/LOXL3/TGFBR2/FADD/LGALS3/LAPTM5/IL7/IL7R/DUSP10/ARG2/PAK3/SMAD7/BAD/HLA-A/NFKBIZ/HES1/HLX/IL15	39
BP	GO:0070431	nucleotide-binding oligomerization domain containing 2 signaling pathway	7/1079	16/18862	1.42456e-05	0.000815749	0.000626965	INAVA/TLR4/SLC15A3/PTPN22/NFKBIA/TNFAIP3/LACC1	7
BP	GO:0032729	positive regulation of interferon-gamma production	14/1079	65/18862	1.45095e-05	0.000822207	0.000631929	IL18R1/TLR4/IL1B/IL18/PDE4D/WNT5A/PTPN22/EBI3/ZP3/CD14/IL1R1/FADD/PDE4B/HLA-A	14
BP	GO:0032757	positive regulation of interleukin-8 production	13/1079	57/18862	1.51693e-05	0.00083625	0.000642721	F2RL1/TLR4/IL1B/IL6/CD74/TLR2/WNT5A/CD14/FADD/F2R/CD58/PARK7/HYAL2	13
BP	GO:0051235	maintenance of location	38/1079	319/18862	1.51765e-05	0.00083625	0.000642721	C3/IL1B/TRPM2/IL6/PTK2B/JPH4/TMSB4Y/PDE4D/ZC3H12A/GRIK5/P2RY6/CHCHD10/DGAT2/NRROS/FTH1/IKBKE/NFKBIA/CLIC2/APOE/INSIG1/ANK3/NBL1/CDS1/PINK1/FGF2/LTBP1/TWF2/SQLE/FKBP1A/SNCA/DMD/PML/NFKBIE/F2R/TPCN1/ANXA6/PARK7/ERO1A	38
BP	GO:0034340	response to type I interferon	18/1079	101/18862	1.52185e-05	0.00083625	0.000642721	OASL/ISG20/OAS2/WNT5A/MX2/IFI6/IKBKE/IFIT2/PSMB8/FADD/IFIT3/ISG15/IFIT1/GBP2/IRF3/TRIM6/HLA-A/IRF7	18
BP	GO:0051403	stress-activated MAPK cascade	33/1079	261/18862	1.60892e-05	0.000873245	0.000671155	F2RL1/INAVA/SERPINF2/TLR4/IL1B/PTK2B/WNT16/DUSP15/WNT5A/ZC3H12A/XDH/SH3RF3/PTPN22/TRIB1/EMC10/IRAK2/GPS2/MAP3K5/SFRP1/PTGER4/DUSP10/WNT7B/PINK1/ADORA2B/DACT1/MAP2K3/MBIP/RASSF2/MAP4K5/TRAF4/MLKL/MAP4K2/ERN1	33
BP	GO:0022612	gland morphogenesis	19/1079	111/18862	1.62128e-05	0.000873245	0.000671155	IL6/CSF1R/ELF3/TGM2/WNT5A/PLAG1/TBX3/CEBPB/TNFAIP3/NOG/TGFBR2/SFRP1/HOXB13/NKX3-1/SOX9/FOXA1/LAMA5/LAMA1/PML	19
BP	GO:0043281	regulation of cysteine-type endopeptidase activity involved in apoptotic process	28/1079	205/18862	1.68064e-05	0.00089634	0.000688905	TNFSF15/CARD16/LAMP3/SOX7/MMP9/XDH/IFI6/THBS1/MAGEA3/HSPE1/MAP3K5/FADD/PRDX5/LAPTM5/NKX3-1/CASP1/TNFAIP8/SNCA/PMAIP1/PDCD5/PML/F2R/CASP8/BAD/FIS1/NLRP1/PARK7/HTRA2	28
BP	GO:0030193	regulation of blood coagulation	14/1079	66/18862	1.74568e-05	0.000921992	0.000708621	F2RL1/SERPINF2/SERPINB2/PLAU/C1QTNF1/THBS1/APOE/VKORC1/PLAT/SH2B3/FAP/SERPINE2/F2R/USF1	14
BP	GO:0030098	lymphocyte differentiation	41/1079	358/18862	1.83105e-05	0.000939984	0.000722449	IL18R1/IL1B/INHBA/IL6/PTK2B/IL18/VNN1/CD74/CYP26B1/IL1A/PRDM1/IL11/ZC3H12A/GATA3/MMP14/SOCS1/SPN/PTPN22/LFNG/PPP2R3C/ADAM8/NFATC2/GPS2/LOXL3/TGFBR2/SFRP1/PIK3CD/FADD/MERTK/PTGER4/IL7/IL7R/DUSP10/FZD9/TCF7/RELB/SMAD7/BAD/NFKBIZ/HLX/IL15	41
BP	GO:0070555	response to interleukin-1	28/1079	206/18862	1.84111e-05	0.000939984	0.000722449	CXCL8/IL1B/IL6/IL1A/ZC3H12A/CCL7/PSMB9/PSME2/NFKBIA/PSMB5/CCL2/PSME1/IRAK2/PSMB10/CEBPB/PSMB8/PSMC6/ADAMTS12/SFRP1/PSMA6/IL1R1/NKX3-1/SOX9/SNCA/GBP2/PSMA7/PSMA1/HYAL2	28
BP	GO:0002367	cytokine production involved in immune response	17/1079	93/18862	1.8474e-05	0.000939984	0.000722449	IL18R1/F2RL1/INAVA/TLR4/IL1B/IL6/IL18/CD74/WNT5A/SEMA7A/GATA3/IL1R1/LAPTM5/SMAD7/LACC1/TRIM6/HLA-A	17
BP	GO:0031638	zymogen activation	13/1079	58/18862	1.85375e-05	0.000939984	0.000722449	PRSS3/SERPINF2/GGT1/PLAU/MMP14/THBS1/FADD/PLAT/PLGRKT/TBC1D10A/SERPINE2/CASP8/BAD	13
BP	GO:0055117	regulation of cardiac muscle contraction	15/1079	75/18862	1.86615e-05	0.000939984	0.000722449	HCN4/EHD3/STC1/PDE4D/ZC3H12A/ADORA1/CLIC2/PDE4B/ADRA1B/RANGRF/BIN1/JUP/DMD/SMAD7/P2RX4	15
BP	GO:0009615	response to virus	41/1079	359/18862	1.95595e-05	0.000968656	0.000744486	OASL/F2RL1/IL6/ISG20/POU2F2/IFI44L/OAS2/ZC3H12A/CXCL12/HMGA2/GATA3/IFI44/MX2/IFI6/PTPN22/IKBKE/BATF3/APOBEC3G/HMGA1/IFIT2/TNFAIP3/NPC2/UNC13D/FADD/ITGB8/IFIT3/APOBEC3F/ISG15/PMAIP1/IFIT1/PML/PQBP1/TSPAN6/IRF3/TRIM6/POLR3K/IL15/NLRP1/MLKL/IRF7/HYAL2	41
BP	GO:0060485	mesenchyme development	35/1079	287/18862	1.97567e-05	0.000968656	0.000744486	IL1B/GREM1/IL6/WNT16/S100A4/NOTCH4/MEOX1/WNT5A/SEMA7A/HMGA2/GATA3/NRP2/HOXA5/NRP1/GDNF/NOG/SEMA6A/EFNA1/LOXL3/EDNRA/TGFBR2/SFRP1/SPRY2/SOX9/FOXA1/LAMA5/DACT3/SDHAF2/ADAM15/SMAD7/HES1/NRG1/ANXA6/SNAI1/TGFBR3	35
BP	GO:0001837	epithelial to mesenchymal transition	23/1079	153/18862	1.99872e-05	0.000968656	0.000744486	IL1B/GREM1/IL6/WNT16/S100A4/NOTCH4/WNT5A/HMGA2/GATA3/NOG/EFNA1/LOXL3/TGFBR2/SFRP1/SPRY2/SOX9/FOXA1/DACT3/SDHAF2/ADAM15/SMAD7/SNAI1/TGFBR3	23
BP	GO:0010565	regulation of cellular ketone metabolic process	26/1079	185/18862	2.0083e-05	0.000968656	0.000744486	AKR1C3/MID1IP1/IL1B/GIP/CD74/APOC1/PSMB9/SLC7A7/DGAT2/PSME2/PSMB5/IRS1/PSME1/PSMB10/FGFR4/PSMB8/INSIG1/PSMC6/NQO1/PSMA6/MFSD2A/SOX9/PTGS2/PSMA7/PSMA1/PARK7	26
BP	GO:0071902	positive regulation of protein serine/threonine kinase activity	37/1079	311/18862	2.0121e-05	0.000968656	0.000744486	TENM1/INAVA/TLR4/IL1B/FLT1/PTK2B/CD74/CSF1R/WNT5A/TCIM/HMGA2/DUSP6/THBS1/LPAR3/ITGA1/ADAM8/DUSP5/IRAK2/TLR6/MAP3K5/ADRB2/SPRY2/PDGFC/FGF2/SNCA/PAK3/ADORA2B/AJUBA/MAP2K3/IGFBP6/CAB39/NRG1/MAP4K5/MLKL/MAP4K2/ERP29/ERN1	37
BP	GO:0050918	positive chemotaxis	14/1079	67/18862	2.09191e-05	0.000983525	0.000755913	F2RL1/CXCL8/WNT5A/CXCL12/ROBO3/PGF/ARTN/ITGA2/NRP1/GDNF/KDR/LGALS3/FGF2/VEGFB	14
BP	GO:1900046	regulation of hemostasis	14/1079	67/18862	2.09191e-05	0.000983525	0.000755913	F2RL1/SERPINF2/SERPINB2/PLAU/C1QTNF1/THBS1/APOE/VKORC1/PLAT/SH2B3/FAP/SERPINE2/F2R/USF1	14
BP	GO:0043406	positive regulation of MAP kinase activity	30/1079	230/18862	2.1153e-05	0.000983525	0.000755913	TENM1/INAVA/TLR4/IL1B/FLT1/PTK2B/CD74/WNT5A/DUSP6/THBS1/LPAR3/ITGA1/ADAM8/DUSP5/IRAK2/TLR6/MAP3K5/PDGFC/FGF2/PAK3/ADORA2B/AJUBA/MAP2K3/IGFBP6/NRG1/MAP4K5/MLKL/MAP4K2/ERP29/ERN1	30
BP	GO:2000116	regulation of cysteine-type endopeptidase activity	30/1079	230/18862	2.1153e-05	0.000983525	0.000755913	TNFSF15/CARD16/LAMP3/SOX7/MMP9/PSMB9/XDH/IFI6/THBS1/MAGEA3/HSPE1/MAP3K5/FADD/PRDX5/LAPTM5/NKX3-1/TBC1D10A/CASP1/TNFAIP8/SNCA/PMAIP1/PDCD5/PML/F2R/CASP8/BAD/FIS1/NLRP1/PARK7/HTRA2	30
BP	GO:0045619	regulation of lymphocyte differentiation	25/1079	175/18862	2.17236e-05	0.0010015	0.000769725	INHBA/IL18/VNN1/CD74/CYP26B1/PRDM1/ZC3H12A/GATA3/MMP14/SOCS1/PPP2R3C/ADAM8/NFATC2/LOXL3/TGFBR2/SFRP1/IL7/IL7R/DUSP10/TCF7/SMAD7/BAD/NFKBIZ/HLX/IL15	25
BP	GO:0007492	endoderm development	15/1079	76/18862	2.20357e-05	0.00100734	0.000774221	INHBA/SOX7/DUSP4/MMP9/HMGA2/LAMB3/MMP14/COL7A1/LHX1/MMP2/ITGA7/DUSP5/NOG/LAMB1/ITGB5	15
BP	GO:0000187	activation of MAPK activity	23/1079	154/18862	2.22482e-05	0.00100859	0.000775175	INAVA/TLR4/IL1B/CD74/WNT5A/DUSP6/THBS1/LPAR3/ITGA1/DUSP5/IRAK2/MAP3K5/FGF2/PAK3/ADORA2B/MAP2K3/IGFBP6/NRG1/MAP4K5/MLKL/MAP4K2/ERP29/ERN1	23
BP	GO:0048568	embryonic organ development	45/1079	412/18862	2.42054e-05	0.00108824	0.000836397	RARRES2/CXCL8/STRA6/CSF2/WNT16/PAX8/WNT5A/CTHRC1/GATA3/MMP14/TBX3/HOXA5/LHX1/GDNF/NES/NKX3-2/KDR/VANGL2/CEBPB/SPINT2/MFAP2/NOG/PHLDA2/PRRX1/EFNA1/VASH1/INSIG1/TCAP/TGFBR2/CHST11/SPRY2/SH2B3/SOX9/TUBB2B/NKX2-6/PDGFC/WNT7B/LIF/FOXG1/SPINT1/CASP8/LRIG1/HES1/HLX/SNAI1	45
BP	GO:0034329	cell junction assembly	46/1079	425/18862	2.48054e-05	0.00110608	0.000850105	PECAM1/NRCAM/IL1B/GREM1/NRXN1/PTK2B/GAP43/IGFN1/CLDN16/COL16A1/CLDN3/LAMC2/TLR2/SH3BP1/WNT5A/LRFN5/AMIGO2/LAMB3/COL17A1/SLITRK4/MMP14/ITGA2/THBS1/SRPX2/RAB13/NRP1/PARD6B/KDR/CLDN14/PCDHB3/FMN1/ARF6/SFRP1/CLDN23/CDH24/CLDN1/DNER/JUP/SNCA/AJUBA/PTPRK/SMAD7/CD151/F11R/FBLIM1/SNAI1	46
BP	GO:0048732	gland development	45/1079	413/18862	2.57028e-05	0.00113677	0.000873696	STRA6/IL6/CSF1R/ELF3/PAX8/NOTCH4/TGM2/OAS2/WNT5A/GATA3/XDH/PLAG1/ASS1/TBX3/ITGA2/PRLR/HOXA5/CEBPB/TNFAIP3/NOG/QDPR/TGFBR2/ARF6/SFRP1/HOXB13/FADD/NKX3-1/SOX9/CLDN1/WNT7B/FOXA1/LAMA5/ARHGAP5/SERPINE2/PRMT5/LAMA1/HMGCS1/PML/GNPNAT1/TAF10/SRP54/HES1/NRG1/HLX/TGFBR3	45
BP	GO:0001704	formation of primary germ layer	19/1079	115/18862	2.71618e-05	0.00118725	0.000912493	INHBA/SOX7/DUSP4/MMP9/WNT5A/HMGA2/LAMB3/MMP14/COL7A1/ITGA2/TLX2/LHX1/MMP2/ITGA7/DUSP5/NOG/LAMB1/ITGB5/SNAI1	19
BP	GO:0003254	regulation of membrane depolarization	11/1079	44/18862	2.72806e-05	0.00118725	0.000912493	HCN4/IFI6/PPP2R3C/KDR/MLLT11/CACNA1G/RANGRF/ANK3/FZD9/GCLM/SMAD7	11
BP	GO:1903793	positive regulation of anion transport	50/1079	478/18862	2.78153e-05	0.00120091	0.000922993	F2RL1/C3/TENM1/PTGES/LIPG/TLR4/IL1B/GPR68/GIP/IL1A/TLR2/C1QTNF1/ZC3H12A/CXCL12/RAPGEF3/ABLIM3/ITGAM/PLA2G4A/OPN3/ADORA1/NFKBIA/IRS1/APOE/STX1A/ADAM8/P2RY2/GDNF/PLK3/KCNN4/CEBPB/GPS2/ARF6/NKX3-1/SYT1/ANK3/AZIN2/ATP13A2/PINK1/JUP/PMAIP1/PDCD5/CASP8/MPC2/BAD/FIS1/SLC26A6/P2RX4/HTRA2/HYAL2/NKX6-1	50
BP	GO:0072593	reactive oxygen species metabolic process	34/1079	281/18862	3.04062e-05	0.00130244	0.00100102	AKR1C3/F2RL1/INAVA/TLR4/IL1B/PTK2B/TLR2/PTX3/ZC3H12A/SH3PXD2A/ITGAM/XDH/GPX3/ASS1/NOX4/NRROS/IFI6/SOD2/THBS1/ROMO1/TLR6/TGFBR2/NQO1/PRDX5/ARG2/PINK1/PTGS2/SNCA/PMAIP1/CYP1B1/CYBA/P2RX4/PID1/PARK7	34
BP	GO:0010632	regulation of epithelial cell migration	35/1079	293/18862	3.06605e-05	0.00130307	0.00100151	PTK2B/ENPP2/MMP9/SH3BP1/PLPP3/STC1/WNT5A/ZC3H12A/GATA3/BMPER/NRP2/ITGA2/THBS1/SRPX2/PTPRR/APOE/NRP1/EMC10/KDR/EFNA1/VASH1/TGFBR2/ARF6/PIK3CD/SOX9/JCAD/DUSP10/FGF2/PTGS2/JUP/RHOB/RRAS/MAP2K3/P2RX4/ANXA3	35
BP	GO:0030178	negative regulation of Wnt signaling pathway	28/1079	212/18862	3.13292e-05	0.00131101	0.00100761	GREM1/WNT5A/CTHRC1/PSMB9/PSME2/PSMB5/PTPRU/APOE/PSME1/NFATC4/PSMB10/NOG/PSMB8/IGFBP4/PSMC6/SFRP1/PSMA6/SOX9/BICC1/APCDD1L/HIC1/DACT3/SDHAF2/TLE3/DACT1/PSMA7/PSMA1/IGFBP6	28
BP	GO:0050870	positive regulation of T cell activation	28/1079	212/18862	3.13292e-05	0.00131101	0.00100761	DPP4/IL1B/IL6/IL18/VNN1/CD74/IL1A/GATA3/SOCS1/PTPN22/CCDC88B/ICOSLG/EBI3/CCL2/ZP3/ADAM8/TGFBR2/FADD/IL7/IL7R/DUSP10/PAK3/BAD/HLA-A/NFKBIZ/HES1/HLX/IL15	28
BP	GO:0090090	negative regulation of canonical Wnt signaling pathway	25/1079	179/18862	3.20347e-05	0.0013303	0.00102243	GREM1/WNT5A/CTHRC1/PSMB9/PSME2/PSMB5/PTPRU/APOE/PSME1/PSMB10/NOG/PSMB8/IGFBP4/PSMC6/SFRP1/PSMA6/SOX9/BICC1/DACT3/SDHAF2/TLE3/DACT1/PSMA7/PSMA1/IGFBP6	25
BP	GO:1905330	regulation of morphogenesis of an epithelium	13/1079	61/18862	3.2881e-05	0.00135509	0.00104149	GREM1/PAX8/WNT5A/GATA3/LHX1/GDNF/NOG/ADAMTS12/SFRP1/PIK3CD/SOX9/FGF2/LIF	13
BP	GO:0003158	endothelium development	21/1079	137/18862	3.36309e-05	0.00136846	0.00105176	F2RL1/COL15A1/PECAM1/IL1B/TIE1/NOTCH4/CLDN3/STC1/PDE4D/RAPGEF3/XDH/ROBO4/NRP1/KDR/ID1/ADAMTS12/CLDN1/WNT7B/RHOB/NRG1/F11R	21
BP	GO:0044106	cellular amine metabolic process	23/1079	158/18862	3.37793e-05	0.00136846	0.00105176	KYNU/AKR1B1/ITGAM/GATA3/PSMB9/SLC7A7/PSME2/PSMB5/SMOX/PSME1/PSMB10/PSMB8/SLC22A3/PSMC6/NQO1/PSMA6/AZIN2/PAOX/SNCA/PSMA7/PSMA1/PARK7/PNKD	23
BP	GO:0051346	negative regulation of hydrolase activity	48/1079	456/18862	3.4115e-05	0.00136846	0.00105176	C3/ANXA8L1/SERPINF2/SERPINB2/CARD16/LAMP3/SERPINB10/ANXA8/TIMP3/SERPINB7/TMEM132D/APOC1/MMP9/MAP2/PTX3/ANGPTL4/COL7A1/WFDC3/TIMP1/IFI6/THBS1/COL6A3/SLC39A14/HMSD/GPS2/SPINT2/MAGEA3/VCPKMT/PPP1R35/CAMK2A/PCSK1N/LGALS3/PRDX5/SPRY2/BIN1/SERPINE2/TNFAIP8/FKBP1A/SNCA/OXA1L/CPEB2/IFIT1/SPINT1/F11R/SERPINB8/PPIF/PARK7/CSTB	48
BP	GO:0002526	acute inflammatory response	18/1079	107/18862	3.42114e-05	0.00136846	0.00105176	C3/SAA2/PTGES/SERPINF2/IL1B/IL6/VNN1/IL1A/GATA3/ASS1/ADORA1/ZP3/ADAM8/IL31RA/CEBPB/PTGS2/SIGIRR/PARK7	18
BP	GO:1903532	positive regulation of secretion by cell	33/1079	271/18862	3.47939e-05	0.0013816	0.00106186	F2RL1/PTGES/KLRC2/TLR4/IL1B/INHBA/GPR68/GIP/IL1A/TLR2/C1QTNF1/CXCL12/ITGAM/PLA2G4A/ZP3/RAB27B/STX1A/ADAM8/GDNF/KCNN4/UNC13D/ARF6/CACNA1G/NKX3-1/RAB3A/SYT1/ATP13A2/PINK1/SNCA/MPC2/BAD/P2RX4/NKX6-1	33
BP	GO:0051047	positive regulation of secretion	35/1079	295/18862	3.53667e-05	0.00139293	0.00107057	F2RL1/PTGES/KLRC2/TLR4/IL1B/INHBA/GPR68/GIP/IL1A/TLR2/C1QTNF1/CXCL12/ITGAM/PLA2G4A/ADORA1/ZP3/RAB27B/STX1A/ADAM8/P2RY2/GDNF/KCNN4/UNC13D/ARF6/CACNA1G/NKX3-1/RAB3A/SYT1/ATP13A2/PINK1/SNCA/MPC2/BAD/P2RX4/NKX6-1	35
BP	GO:0072077	renal vesicle morphogenesis	7/1079	18/18862	3.5813e-05	0.00139293	0.00107057	GREM1/PAX8/LHX1/GDNF/FMN1/SOX9/LIF	7
BP	GO:0097530	granulocyte migration	22/1079	148/18862	3.58475e-05	0.00139293	0.00107057	RARRES2/CXCL5/DPP4/CXCL6/CXCL8/PECAM1/CXCL1/CXCL2/CD74/CSF1R/CXCL3/CCL7/THBS1/CCL2/ITGA1/ADAM8/IL1R1/PIK3CD/LGALS3/PDE4B/PTGER4/SRP54	22
BP	GO:0070371	ERK1 and ERK2 cascade	37/1079	320/18862	3.75599e-05	0.00144912	0.00111376	F2RL1/SERPINF2/TLR4/IL1B/PTK2B/TIMP3/DUSP4/CD74/CSF1R/NDRG2/P2RY6/SEMA7A/CCL7/DUSP6/BMPER/PTPN22/PTPRR/CCL2/TNIP1/APOE/NRP1/KDR/FGFR4/SEMA6A/SPRY4/SPRY2/TNFAIP8L3/PTGER4/SOX9/DUSP10/PDGFC/FGF2/LIF/PRMT5/RRAS/F2R/RGS14	37
BP	GO:0043409	negative regulation of MAPK cascade	25/1079	181/18862	3.86914e-05	0.00148226	0.00113923	F2RL1/TLR4/IL1B/TIMP3/DUSP4/NDRG2/DUSP6/PTPN22/PTPRR/TNIP1/APOE/DUSP5/GPS2/SEMA6A/EFNA1/SPRY4/SFRP1/SPRY2/SH2B3/DUSP10/PINK1/LIF/DACT1/RGS14/HYAL2	25
BP	GO:0006521	regulation of cellular amino acid metabolic process	13/1079	62/18862	3.94496e-05	0.00150074	0.00115343	PSMB9/SLC7A7/PSME2/PSMB5/PSME1/PSMB10/PSMB8/PSMC6/NQO1/PSMA6/PSMA7/PSMA1/PARK7	13
BP	GO:0003338	metanephros morphogenesis	9/1079	31/18862	4.07003e-05	0.00153757	0.00118174	GREM1/PAX8/LHX1/GDNF/FMN1/SOX9/WNT7B/LIF/HES1	9
BP	GO:0050818	regulation of coagulation	14/1079	71/18862	4.1555e-05	0.00155101	0.00119207	F2RL1/SERPINF2/SERPINB2/PLAU/C1QTNF1/THBS1/APOE/VKORC1/PLAT/SH2B3/FAP/SERPINE2/F2R/USF1	14
BP	GO:0060340	positive regulation of type I interferon-mediated signaling pathway	6/1079	13/18862	4.18682e-05	0.00155101	0.00119207	WNT5A/IKBKE/FADD/IRF3/TRIM6/IRF7	6
BP	GO:0050921	positive regulation of chemotaxis	21/1079	139/18862	4.19115e-05	0.00155101	0.00119207	F2RL1/RARRES2/CXCL8/IL6/PTK2B/CD74/CSF1R/WNT5A/CXCL12/CCL7/PGF/ARTN/ITGA2/THBS1/GPSM3/NRP1/KDR/FGF2/VEGFB/TMEM102/P2RX4	21
BP	GO:0010950	positive regulation of endopeptidase activity	25/1079	182/18862	4.24659e-05	0.00156091	0.00119968	TNFSF15/SOX7/XDH/PSME2/PSME1/EFNA1/HSPE1/MAP3K5/FADD/PSENEN/LAPTM5/NKX3-1/TBC1D10A/CASP1/SNCA/PMAIP1/PDCD5/PML/F2R/CASP8/APH1B/BAD/FIS1/NLRP1/HTRA2	25
BP	GO:0050730	regulation of peptidyl-tyrosine phosphorylation	32/1079	262/18862	4.28554e-05	0.00156465	0.00120256	CSF3/PECAM1/GREM1/IL6/CSF2/PTK2B/IL18/CD74/ENPP2/CSF1R/IL24/SAMSN1/BTC/IL11/NOX4/SOCS1/ADORA1/IL31RA/NRP1/EFNA1/SFRP1/SH2B3/IL7/PDGFC/LIF/SNX6/MVP/HES1/NRG1/IL15/TMEM102/HYAL2	32
BP	GO:0046328	regulation of JNK cascade	20/1079	129/18862	4.34679e-05	0.00157643	0.00121161	F2RL1/SERPINF2/TLR4/IL1B/PTK2B/WNT16/DUSP15/WNT5A/SH3RF3/PTPN22/GPS2/MAP3K5/SFRP1/DUSP10/WNT7B/PINK1/DACT1/RASSF2/TRAF4/MAP4K2	20
BP	GO:0002688	regulation of leukocyte chemotaxis	19/1079	119/18862	4.42874e-05	0.00158502	0.00121821	F2RL1/RARRES2/DPP4/CXCL8/GREM1/IL6/PTK2B/CD74/CSF1R/WNT5A/CXCL12/CCL7/PGF/THBS1/CCL2/GPSM3/NBL1/VEGFB/TMEM102	19
BP	GO:0045446	endothelial cell differentiation	19/1079	119/18862	4.42874e-05	0.00158502	0.00121821	F2RL1/COL15A1/PECAM1/IL1B/TIE1/NOTCH4/CLDN3/STC1/PDE4D/RAPGEF3/XDH/ROBO4/NRP1/KDR/ID1/CLDN1/WNT7B/NRG1/F11R	19
BP	GO:0042119	neutrophil activation	51/1079	500/18862	4.51192e-05	0.00160114	0.0012306	F2RL1/C3/PRSS3/CXCL6/CXCL8/PECAM1/TRPM2/SNAP25/CXCL1/SERPINB10/HSPA6/IL18/VNN1/ANPEP/OSCAR/MMP9/PLAU/CTSS/TLR2/PTX3/CREG1/ITGAM/CDA/RHOF/FTH1/CD14/ADAM8/OLR1/QPCT/NPC2/UNC13D/LGALS3/RAB3A/GGH/IDH1/JUP/AMPD3/ATAD3B/MVP/CYBA/ACAA1/CAB39/AGA/ADGRE5/C1orf35/IL15/CD58/ARHGAP45/ANXA3/CD63/CSTB	51
BP	GO:0071560	cellular response to transforming growth factor beta stimulus	31/1079	251/18862	4.53264e-05	0.00160114	0.0012306	PMEPA1/HTRA3/DUSP15/WNT5A/SOX5/LPXN/NOX4/NRROS/THBS1/ID1/LTBP2/TGFBR2/SFRP1/CHST11/ITGB8/SPRY2/SOX9/CLDN1/LTBP1/SNX6/PDCD5/PML/LTBP3/PTPRK/ITGB5/SMAD7/LEMD3/F11R/FUT8/TGFBR3/HYAL2	31
BP	GO:0097191	extrinsic apoptotic signaling pathway	28/1079	217/18862	4.7846e-05	0.00167924	0.00129062	SRPX/G0S2/IL1B/INHBA/CSF2/TIMP3/IL1A/BCL2A1/IFI6/THBS1/GDNF/TNFAIP3/TNFSF12/BCL2L2/MLLT11/SFRP1/FADD/LGALS3/IL7/PMAIP1/PML/GCLM/CASP8/BAD/ITM2C/PARK7/HTRA2/HYAL2	28
BP	GO:0140353	lipid export from cell	15/1079	81/18862	4.83201e-05	0.00168501	0.00129506	PTGES/IL1B/INHBA/SNAP25/SLC1A3/C1QTNF1/PLA2G4A/ADORA1/STX1A/GLS/NKX3-1/RAB3A/SYT1/TSPOAP1/P2RX4	15
BP	GO:0050927	positive regulation of positive chemotaxis	8/1079	25/18862	5.03934e-05	0.00173506	0.00133353	F2RL1/CXCL8/CXCL12/PGF/ARTN/ITGA2/KDR/VEGFB	8
BP	GO:0072273	metanephric nephron morphogenesis	8/1079	25/18862	5.03934e-05	0.00173506	0.00133353	GREM1/PAX8/LHX1/GDNF/FMN1/SOX9/LIF/HES1	8
BP	GO:0001836	release of cytochrome c from mitochondria	12/1079	55/18862	5.13872e-05	0.00175815	0.00135127	MMP9/IFI6/SOD2/BMF/MLLT11/PINK1/FZD9/PMAIP1/PDCD5/BAD/FIS1/PPIF	12
BP	GO:0070372	regulation of ERK1 and ERK2 cascade	35/1079	301/18862	5.3701e-05	0.00179916	0.00138279	F2RL1/SERPINF2/TLR4/IL1B/PTK2B/TIMP3/DUSP4/CD74/CSF1R/NDRG2/P2RY6/SEMA7A/CCL7/DUSP6/BMPER/PTPN22/PTPRR/CCL2/TNIP1/APOE/NRP1/KDR/FGFR4/SEMA6A/SPRY4/SPRY2/TNFAIP8L3/DUSP10/PDGFC/FGF2/LIF/PRMT5/RRAS/F2R/RGS14	35
BP	GO:0034331	cell junction maintenance	9/1079	32/18862	5.37688e-05	0.00179916	0.00138279	F2RL1/INAVA/CSF1R/CLDN3/CHCHD10/ARF6/RAB3A/CLDN1/F2R	9
BP	GO:0034138	toll-like receptor 3 signaling pathway	7/1079	19/18862	5.39085e-05	0.00179916	0.00138279	F2RL1/PTPN22/TNFAIP3/COLEC12/FADD/CASP8/RFTN1	7
BP	GO:0072087	renal vesicle development	7/1079	19/18862	5.39085e-05	0.00179916	0.00138279	GREM1/PAX8/LHX1/GDNF/FMN1/SOX9/LIF	7
BP	GO:0009308	amine metabolic process	23/1079	163/18862	5.55904e-05	0.00184398	0.00141723	KYNU/AKR1B1/ITGAM/GATA3/PSMB9/SLC7A7/PSME2/PSMB5/SMOX/PSME1/PSMB10/PSMB8/SLC22A3/PSMC6/NQO1/PSMA6/AZIN2/PAOX/SNCA/PSMA7/PSMA1/PARK7/PNKD	23
BP	GO:1903706	regulation of hemopoiesis	44/1079	415/18862	6.04013e-05	0.0019899	0.00152939	CSF3/TLR4/INHBA/GPR68/CSF2/PTK2B/IL18/VNN1/CD74/CYP26B1/PRDM1/ZC3H12A/TCIM/GATA3/MMP14/SOCS1/THBS1/NFKBIA/HOXA5/PPP2R3C/TRIB1/ADAM8/CEBPB/NFATC2/LOXL3/TGFBR2/SFRP1/FADD/LGALS3/IL7/IL7R/ISG15/DUSP10/LIF/TCF7/PRXL2A/CASP8/SMAD7/BAD/NFKBIZ/HLX/IL15/RASSF2/IRF7	44
BP	GO:0010595	positive regulation of endothelial cell migration	20/1079	132/18862	6.07211e-05	0.0019899	0.00152939	PTK2B/PLPP3/WNT5A/ZC3H12A/GATA3/NRP2/THBS1/SRPX2/NRP1/EMC10/KDR/PIK3CD/JCAD/FGF2/PTGS2/RHOB/RRAS/MAP2K3/P2RX4/ANXA3	20
BP	GO:0097237	cellular response to toxic substance	19/1079	122/18862	6.28504e-05	0.00204734	0.00157354	PTGS1/PTGES/ALOX5AP/GPX3/SOD2/ABTB2/CLIC2/APOE/RDH11/NQO1/PRDX5/TXNDC17/PINK1/PTGS2/PRXL2A/MGST3/PARK7/PRXL2B/AKR1A1	19
BP	GO:2000736	regulation of stem cell differentiation	18/1079	112/18862	6.3818e-05	0.00206649	0.00158825	OCIAD2/SOX5/GATA3/PSMB9/PSME2/PSMB5/GDNF/PSME1/PSMB10/PSMB8/PSMC6/PSMA6/SOX9/LTBP3/PSMA7/PSMA1/TRIM6/HES1	18
BP	GO:0043122	regulation of I-kappaB kinase/NF-kappaB signaling	30/1079	244/18862	6.49569e-05	0.00208394	0.00160167	F2RL1/INAVA/TNIP3/TLR4/IL1B/CARD16/CD74/S100A4/TGM2/WNT5A/ZC3H12A/APOL3/IKBKE/TNIP1/TNFAIP3/TLR6/FADD/PINK1/CASP1/FKBP1A/AJUBA/TSPAN6/F2R/MIB2/CASP8/SLC20A1/IRF3/TRIM6/TRAF4/TRIM39	30
BP	GO:0030195	negative regulation of blood coagulation	11/1079	48/18862	6.51231e-05	0.00208394	0.00160167	SERPINF2/SERPINB2/PLAU/C1QTNF1/THBS1/APOE/PLAT/SH2B3/FAP/SERPINE2/USF1	11
BP	GO:2000027	regulation of animal organ morphogenesis	24/1079	176/18862	6.74818e-05	0.00214679	0.00164997	GREM1/PAX8/WNT5A/CTHRC1/GATA3/PSMB9/PSME2/PSMB5/TNFRSF11B/LHX1/GDNF/VANGL2/PSME1/PSMB10/NOG/PSMB8/PSMC6/SFRP1/PSMA6/SOX9/DACT1/PRICKLE2/PSMA7/PSMA1	24
BP	GO:0010001	glial cell differentiation	27/1079	210/18862	6.89879e-05	0.00217464	0.00167137	TLR4/IL6/GAP43/SH3TC2/ZNF488/GPR37L1/TLR2/NRROS/TNFRSF21/NDRG1/NOG/PRDM8/SOX9/MXRA8/DUSP10/DNER/BIN1/METRN/LIF/SERPINE2/PRMT5/ADAM22/MYRF/SPINT1/TSPAN2/HES1/NKX6-1	27
BP	GO:0050926	regulation of positive chemotaxis	8/1079	26/18862	6.91566e-05	0.00217464	0.00167137	F2RL1/CXCL8/CXCL12/PGF/ARTN/ITGA2/KDR/VEGFB	8
BP	GO:0010951	negative regulation of endopeptidase activity	30/1079	245/18862	7.00662e-05	0.00219057	0.00168362	C3/ANXA8L1/SERPINF2/SERPINB2/CARD16/LAMP3/SERPINB10/ANXA8/TIMP3/SERPINB7/MMP9/COL7A1/WFDC3/TIMP1/IFI6/THBS1/COL6A3/HMSD/SPINT2/MAGEA3/PCSK1N/PRDX5/BIN1/SERPINE2/TNFAIP8/SNCA/SPINT1/SERPINB8/PARK7/CSTB	30
BP	GO:0071559	response to transforming growth factor beta	31/1079	257/18862	7.10597e-05	0.00220894	0.00169774	PMEPA1/HTRA3/DUSP15/WNT5A/SOX5/LPXN/NOX4/NRROS/THBS1/ID1/LTBP2/TGFBR2/SFRP1/CHST11/ITGB8/SPRY2/SOX9/CLDN1/LTBP1/SNX6/PDCD5/PML/LTBP3/PTPRK/ITGB5/SMAD7/LEMD3/F11R/FUT8/TGFBR3/HYAL2	31
BP	GO:0002718	regulation of cytokine production involved in immune response	15/1079	84/18862	7.48337e-05	0.00231304	0.00177775	IL18R1/F2RL1/TLR4/IL1B/IL6/IL18/CD74/WNT5A/SEMA7A/GATA3/IL1R1/LAPTM5/SMAD7/TRIM6/HLA-A	15
BP	GO:0030099	myeloid cell differentiation	44/1079	419/18862	7.55892e-05	0.00232319	0.00178555	CSF3/F2RL1/DHRS2/TLR4/INHBA/GPR68/CSF2/PTK2B/CD74/CSF1R/OSCAR/MMP9/TLR2/IL11/SH3PXD2A/GATA3/NRROS/THBS1/NFKBIA/BATF3/HOXA5/TRIB1/IL31RA/CEBPB/TGFBR2/SFRP1/PIK3CD/FADD/LGALS3/ITGB8/SH2B3/ISG15/LIF/PML/PRXL2A/CASP8/RELB/SRP54/TSPAN2/IL15/RASSF2/SLC11A2/TGFBR3/IRF7	44
BP	GO:0050866	negative regulation of cell activation	26/1079	200/18862	7.7518e-05	0.0023493	0.00180561	INHBA/CD74/SAMSN1/C1QTNF1/ZC3H12A/LRFN5/SOCS1/SPN/PTPN22/APOE/IL31RA/TNFRSF21/CEBPB/TNFAIP3/MILR1/LOXL3/SFRP1/LGALS3/MERTK/LAPTM5/SH2B3/SYT11/ARG2/SERPINE2/SMAD7/HLX	26
BP	GO:0001885	endothelial cell development	13/1079	66/18862	7.85041e-05	0.0023493	0.00180561	F2RL1/COL15A1/PECAM1/IL1B/NOTCH4/CLDN3/STC1/PDE4D/RAPGEF3/ROBO4/CLDN1/WNT7B/F11R	13
BP	GO:0002726	positive regulation of T cell cytokine production	7/1079	20/18862	7.88513e-05	0.0023493	0.00180561	IL18R1/IL1B/IL6/IL18/GATA3/IL1R1/HLA-A	7
BP	GO:0042088	T-helper 1 type immune response	10/1079	41/18862	7.92752e-05	0.0023493	0.00180561	IL18R1/TLR4/IL1B/IL18/PLA2G4A/SPN/EBI3/IL1R1/RELB/HLX	10
BP	GO:0018108	peptidyl-tyrosine phosphorylation	40/1079	369/18862	7.9503e-05	0.0023493	0.00180561	CSF3/PECAM1/GREM1/IL6/FLT1/CSF2/PTK2B/IL18/TIE1/CD74/ENPP2/CSF1R/IL24/SAMSN1/BTC/IL11/NOX4/SOCS1/ADORA1/PRLR/IL31RA/NRP1/KDR/FGFR4/EFNA1/SFRP1/MERTK/SH2B3/IL7/PDGFC/LIF/SNX6/MVP/MAP2K3/HES1/NRG1/IL15/STK16/TMEM102/HYAL2	40
BP	GO:0001961	positive regulation of cytokine-mediated signaling pathway	11/1079	49/18862	7.96765e-05	0.0023493	0.00180561	CD74/WNT5A/IKBKE/IL1R1/FADD/LAPTM5/IL7/CASP1/IRF3/TRIM6/IRF7	11
BP	GO:1900047	negative regulation of hemostasis	11/1079	49/18862	7.96765e-05	0.0023493	0.00180561	SERPINF2/SERPINB2/PLAU/C1QTNF1/THBS1/APOE/PLAT/SH2B3/FAP/SERPINE2/USF1	11
BP	GO:0002831	regulation of response to biotic stimulus	44/1079	420/18862	7.98934e-05	0.0023493	0.00180561	F2RL1/CXCL6/KLRC2/TLR4/CARD16/WNT5A/ZC3H12A/PSMB9/SOCS1/PSME2/PTPN22/IKBKE/PSMB5/APOE/PPP2R3C/TRIB1/ADAM8/APOBEC3G/PSME1/PSMB10/TNFAIP3/PSMB8/PSMC6/PSMA6/FADD/GBP5/APOBEC3F/SYT11/DUSP10/ARG2/PAK3/IFIT1/PQBP1/TSPAN6/SIGIRR/RELB/PSMA7/CYBA/PSMA1/IRF3/TRIM6/HLA-A/IL15/IRF7	44
BP	GO:0097193	intrinsic apoptotic signaling pathway	33/1079	283/18862	8.21508e-05	0.00240269	0.00184665	VNN1/CD74/MMP9/BCL2A1/CXCL12/IFI6/IKBKE/SOD2/BMF/RPL26/NFATC4/CEBPB/BCL2L2/MAGEA3/MAP3K5/MLLT11/NKX3-1/PINK1/PHLDA3/PMAIP1/HIC1/PML/HINT1/CYP1B1/BAD/FIS1/PPIF/PARK7/HTRA2/SNAI1/ERO1A/ERP29/ERN1	33
BP	GO:0016485	protein processing	28/1079	224/18862	8.4157e-05	0.00243518	0.00187162	SCG5/PRSS3/SERPINF2/CARD16/GGT1/PLAU/CTSS/MMP14/CPE/THBS1/ADAM8/MAGEA3/PCSK1N/FADD/PSENEN/PLAT/TMEM208/PLGRKT/TBC1D10A/CASP1/SERPINE2/MYRF/CASP8/APH1B/BAD/ADAMTS3/PHEX/HTRA2	28
BP	GO:0050920	regulation of chemotaxis	28/1079	224/18862	8.4157e-05	0.00243518	0.00187162	F2RL1/RARRES2/DPP4/CXCL8/GREM1/IL6/PTK2B/CD74/CSF1R/WNT5A/CXCL12/SEMA7A/CCL7/PGF/ARTN/ITGA2/THBS1/CCL2/GPSM3/NRP1/KDR/SEMA6A/TUBB2B/NBL1/FGF2/VEGFB/TMEM102/P2RX4	28
BP	GO:0045580	regulation of T cell differentiation	21/1079	146/18862	8.71162e-05	0.00250747	0.00192718	IL18/VNN1/CD74/CYP26B1/PRDM1/ZC3H12A/GATA3/SOCS1/ADAM8/NFATC2/LOXL3/TGFBR2/IL7/IL7R/DUSP10/TCF7/SMAD7/BAD/NFKBIZ/HLX/IL15	21
BP	GO:0051607	defense response to virus	31/1079	260/18862	8.83375e-05	0.002516	0.00193374	OASL/F2RL1/IL6/ISG20/IFI44L/OAS2/ZC3H12A/MX2/IFI6/PTPN22/APOBEC3G/IFIT2/TNFAIP3/UNC13D/FADD/IFIT3/APOBEC3F/ISG15/PMAIP1/IFIT1/PML/PQBP1/TSPAN6/IRF3/TRIM6/POLR3K/IL15/NLRP1/MLKL/IRF7/HYAL2	31
BP	GO:0140546	defense response to symbiont	31/1079	260/18862	8.83375e-05	0.002516	0.00193374	OASL/F2RL1/IL6/ISG20/IFI44L/OAS2/ZC3H12A/MX2/IFI6/PTPN22/APOBEC3G/IFIT2/TNFAIP3/UNC13D/FADD/IFIT3/APOBEC3F/ISG15/PMAIP1/IFIT1/PML/PQBP1/TSPAN6/IRF3/TRIM6/POLR3K/IL15/NLRP1/MLKL/IRF7/HYAL2	31
BP	GO:0002224	toll-like receptor signaling pathway	22/1079	157/18862	8.88588e-05	0.00251766	0.00193502	F2RL1/TNIP3/TLR4/CTSS/TLR2/ITGAM/PTPN22/IKBKE/NFKBIA/TNIP1/CD14/IRAK2/TNFAIP3/GPS2/TLR6/COLEC12/FADD/CASP8/CYBA/IRF3/RFTN1/IRF7	22
BP	GO:0002756	MyD88-independent toll-like receptor signaling pathway	9/1079	34/18862	9.06641e-05	0.0025555	0.0019641	TNIP3/TLR4/IKBKE/CD14/TLR6/FADD/CASP8/IRF3/IRF7	9
BP	GO:0038034	signal transduction in absence of ligand	13/1079	67/18862	9.23672e-05	0.00257681	0.00198047	SRPX/IL1B/INHBA/CSF2/IL1A/BCL2A1/IFI6/GDNF/BCL2L2/FADD/IL7/BAD/HTRA2	13
BP	GO:0097192	extrinsic apoptotic signaling pathway in absence of ligand	13/1079	67/18862	9.23672e-05	0.00257681	0.00198047	SRPX/IL1B/INHBA/CSF2/IL1A/BCL2A1/IFI6/GDNF/BCL2L2/FADD/IL7/BAD/HTRA2	13
BP	GO:0090200	positive regulation of release of cytochrome c from mitochondria	8/1079	27/18862	9.33727e-05	0.00259157	0.00199182	MMP9/BMF/MLLT11/PINK1/PMAIP1/PDCD5/BAD/PPIF	8
BP	GO:0018212	peptidyl-tyrosine modification	40/1079	372/18862	9.48634e-05	0.00261958	0.00201335	CSF3/PECAM1/GREM1/IL6/FLT1/CSF2/PTK2B/IL18/TIE1/CD74/ENPP2/CSF1R/IL24/SAMSN1/BTC/IL11/NOX4/SOCS1/ADORA1/PRLR/IL31RA/NRP1/KDR/FGFR4/EFNA1/SFRP1/MERTK/SH2B3/IL7/PDGFC/LIF/SNX6/MVP/MAP2K3/HES1/NRG1/IL15/STK16/TMEM102/HYAL2	40
BP	GO:0071604	transforming growth factor beta production	10/1079	42/18862	9.87619e-05	0.0027035	0.00207785	LUM/SERPINF2/SERPINB7/NRROS/THBS1/ITGB8/PTGS2/LTBP1/FKBP1A/LTBP3	10
BP	GO:0001657	ureteric bud development	15/1079	86/18862	9.88965e-05	0.0027035	0.00207785	GREM1/PAX8/GATA3/BMPER/LHX1/GDNF/NOG/FMN1/SFRP1/SOX9/ARG2/FGF2/LAMA5/SMAD7/HES1	15
BP	GO:0006066	alcohol metabolic process	40/1079	373/18862	0.000100552	0.00273502	0.00210207	AKR1C3/CYP11A1/SPTLC3/PTK2B/IP6K3/AKR1B1/PLPP3/PLB1/P2RY6/PLA2G4A/DGAT2/ALDH2/SCARF1/APOE/CYP2R1/NPC2/APOL1/QDPR/INSIG1/DHRS4/RDH11/CYP51A1/FGF2/PMVK/IDH1/SQLE/SNCA/MSMO1/HMGCS1/IDI1/CYP1B1/CLN8/PGP/PIP4P1/HSD17B7/SYNJ2/GALK1/PARK7/NUDT11/AKR1A1	40
BP	GO:0032874	positive regulation of stress-activated MAPK cascade	18/1079	116/18862	0.000101935	0.00275882	0.00212037	F2RL1/INAVA/SERPINF2/TLR4/IL1B/PTK2B/WNT16/DUSP15/WNT5A/ZC3H12A/XDH/SH3RF3/EMC10/MAP3K5/WNT7B/RASSF2/TRAF4/MAP4K2	18
BP	GO:2000377	regulation of reactive oxygen species metabolic process	25/1079	192/18862	0.000102896	0.00277106	0.00212977	AKR1C3/F2RL1/TLR4/IL1B/PTK2B/PTX3/ZC3H12A/ITGAM/XDH/ASS1/NOX4/SOD2/THBS1/ROMO1/TLR6/TGFBR2/ARG2/PINK1/PTGS2/SNCA/CYP1B1/CYBA/P2RX4/PID1/PARK7	25
BP	GO:0150115	cell-substrate junction organization	17/1079	106/18862	0.000103759	0.00278054	0.00213706	GREM1/PTK2B/COL16A1/LAMC2/LAMB3/COL17A1/MMP14/ITGA2/THBS1/NRP1/KDR/FMN1/ARF6/SFRP1/AJUBA/PTPRK/CD151	17
BP	GO:0043407	negative regulation of MAP kinase activity	14/1079	77/18862	0.00010529	0.00280032	0.00215226	IL1B/DUSP4/DUSP6/PTPN22/APOE/DUSP5/GPS2/SPRY4/SFRP1/SPRY2/SH2B3/DUSP10/RGS14/HYAL2	14
BP	GO:0032872	regulation of stress-activated MAPK cascade	24/1079	181/18862	0.000105527	0.00280032	0.00215226	F2RL1/INAVA/SERPINF2/TLR4/IL1B/PTK2B/WNT16/DUSP15/WNT5A/ZC3H12A/XDH/SH3RF3/PTPN22/EMC10/GPS2/MAP3K5/SFRP1/DUSP10/WNT7B/PINK1/DACT1/RASSF2/TRAF4/MAP4K2	24
BP	GO:0050852	T cell receptor signaling pathway	26/1079	204/18862	0.000107933	0.00284607	0.00218742	PDE4D/ZC3H12A/GATA3/PSMB9/PSME2/PTPN22/ICOSLG/PSMB5/TNFRSF21/KCNN4/PSME1/PSMB10/PSMB8/PSMC6/PSMA6/PIK3CD/LGALS3/FYB1/LAPTM5/PDE4B/PAK3/PSMA7/PSMA1/HLA-A/NFKBIZ/RFTN1	26
BP	GO:0045685	regulation of glial cell differentiation	13/1079	68/18862	0.000108297	0.00284607	0.00218742	IL6/GPR37L1/TLR2/TNFRSF21/NOG/DUSP10/BIN1/LIF/SERPINE2/PRMT5/SPINT1/HES1/NKX6-1	13
BP	GO:0072283	metanephric renal vesicle morphogenesis	6/1079	15/18862	0.000110583	0.00289218	0.00222286	GREM1/PAX8/LHX1/GDNF/FMN1/LIF	6
BP	GO:0072163	mesonephric epithelium development	15/1079	87/18862	0.000113276	0.0029344	0.00225531	GREM1/PAX8/GATA3/BMPER/LHX1/GDNF/NOG/FMN1/SFRP1/SOX9/ARG2/FGF2/LAMA5/SMAD7/HES1	15
BP	GO:0072164	mesonephric tubule development	15/1079	87/18862	0.000113276	0.0029344	0.00225531	GREM1/PAX8/GATA3/BMPER/LHX1/GDNF/NOG/FMN1/SFRP1/SOX9/ARG2/FGF2/LAMA5/SMAD7/HES1	15
BP	GO:0090066	regulation of anatomical structure size	49/1079	493/18862	0.000119798	0.00308862	0.00237384	CSF3/F2RL1/TENM1/AVPR2/SERPINF2/NRCAM/PTK2B/ISLR2/TMSB4Y/SH3BP1/MAP2/WNT5A/CXCL12/SEMA7A/CRABP2/SOD2/ADORA1/HTR7/SPTB/LPAR3/APOE/RILP/ITGA1/P2RY2/NRP1/KCNN4/SEMA6A/ATP2B1/FMN1/ADRB2/FHOD3/EDNRA/ARF6/CFL2/IL7R/ADRA1B/ARPC4/DOCK4/CAPG/ATP13A2/BIN1/TWF2/PAK3/GCLM/F2R/CLN8/ARHGAP18/CDC42EP4/NKX6-1	49
BP	GO:0071456	cellular response to hypoxia	26/1079	206/18862	0.000126817	0.00324405	0.0024933	CARD16/STC1/PSMB9/PSME2/PSMB5/AQP3/ADAM8/PLK3/PSME1/PSMB10/NDRG1/PSMB8/PSMC6/SFRP1/PSMA6/NKX3-1/PINK1/PTGS2/PMAIP1/CPEB2/AJUBA/PSMA7/PSMA1/BAD/KCNK2/ERO1A	26
BP	GO:0008637	apoptotic mitochondrial changes	18/1079	118/18862	0.000127615	0.00324405	0.0024933	MMP9/CHCHD10/IFI6/SOD2/BMF/IFIT2/CAMK2A/MLLT11/PINK1/FZD9/PMAIP1/PDCD5/GCLM/CASP8/BAD/FIS1/TMEM102/PPIF	18
BP	GO:0070304	positive regulation of stress-activated protein kinase signaling cascade	18/1079	118/18862	0.000127615	0.00324405	0.0024933	F2RL1/INAVA/SERPINF2/TLR4/IL1B/PTK2B/WNT16/DUSP15/WNT5A/ZC3H12A/XDH/SH3RF3/EMC10/MAP3K5/WNT7B/RASSF2/TRAF4/MAP4K2	18
BP	GO:1901214	regulation of neuron death	34/1079	302/18862	0.000128944	0.00324515	0.00249415	CSF3/TLR4/PTK2B/WNT5A/GRIK5/ITGAM/GATA3/SOD2/SNCG/ADORA1/CCL2/APOE/ITGA1/ADAM8/GDNF/NES/NFATC4/CEBPB/TLR6/MAP3K5/NQO1/ATP13A2/PINK1/FZD9/SNX6/SNCA/PAK3/GCLM/F2R/CASP8/BAD/PARK7/HTRA2/EIF2S1	34
BP	GO:0002683	negative regulation of immune system process	42/1079	403/18862	0.000129104	0.00324515	0.00249415	DPP4/TLR4/INHBA/GREM1/GPR68/CD74/SAMSN1/ZC3H12A/CXCL12/LPXN/LRFN5/SOCS1/SPN/PTPN22/THBS1/ADORA1/CCL2/TRIB1/IL31RA/TNFRSF21/CEBPB/TNFAIP3/GPS2/MILR1/LOXL3/SFRP1/FADD/LGALS3/MERTK/LAPTM5/PTGER4/SOX9/SYT11/IL7R/DUSP10/ARG2/NBL1/TSPAN6/PSMA1/SMAD7/HLA-A/HLX	42
BP	GO:0006937	regulation of muscle contraction	22/1079	161/18862	0.000129448	0.00324515	0.00249415	HCN4/EHD3/STC1/PDE4D/ZC3H12A/ITGA2/ADORA1/CLIC2/SSTR2/ATP2B1/ADRB2/PDE4B/ADRA1B/RANGRF/DOCK4/BIN1/JUP/DMD/F2R/SMAD7/P2RX4/ANXA6	22
BP	GO:0032611	interleukin-1 beta production	17/1079	108/18862	0.000131468	0.00328067	0.00252144	F2RL1/INAVA/TLR4/CARD16/IL6/WNT5A/ZC3H12A/TNFAIP3/TLR6/TRIM16/GBP5/ARG2/CASP1/PML/F2R/CASP8/NLRP1	17
BP	GO:0070302	regulation of stress-activated protein kinase signaling cascade	24/1079	184/18862	0.000136615	0.00339354	0.00260819	F2RL1/INAVA/SERPINF2/TLR4/IL1B/PTK2B/WNT16/DUSP15/WNT5A/ZC3H12A/XDH/SH3RF3/PTPN22/EMC10/GPS2/MAP3K5/SFRP1/DUSP10/WNT7B/PINK1/DACT1/RASSF2/TRAF4/MAP4K2	24
BP	GO:0002064	epithelial cell development	26/1079	207/18862	0.000137321	0.00339557	0.00260975	F2RL1/COL15A1/PECAM1/IL1B/AKR1B1/NOTCH4/CLDN3/STC1/PDE4D/WNT5A/RAPGEF3/GPR4/ROBO4/HOXA5/RAB13/NKX3-2/SPINT2/HOXB13/SOX9/CLDN1/WNT7B/FOXA1/BAD/F11R/NKX6-1/RILPL2	26
BP	GO:0050819	negative regulation of coagulation	11/1079	52/18862	0.000141117	0.00347364	0.00266976	SERPINF2/SERPINB2/PLAU/C1QTNF1/THBS1/APOE/PLAT/SH2B3/FAP/SERPINE2/USF1	11
BP	GO:0046849	bone remodeling	15/1079	89/18862	0.000147578	0.00361633	0.00277943	TMEM119/GREM1/IL6/PTK2B/WNT16/CSF1R/CTHRC1/TNFRSF11B/ADAM8/TNFAIP3/ADRB2/SFRP1/IL7/LTBP3/RASSF2	15
BP	GO:0002221	pattern recognition receptor signaling pathway	26/1079	208/18862	0.000148594	0.00362489	0.002786	F2RL1/INAVA/TNIP3/TLR4/CTSS/TLR2/ITGAM/SLC15A3/PTPN22/IKBKE/NFKBIA/TNIP1/CD14/IRAK2/TNFAIP3/GPS2/TLR6/COLEC12/FADD/TSPAN6/CASP8/CYBA/LACC1/IRF3/RFTN1/IRF7	26
BP	GO:0035987	endodermal cell differentiation	10/1079	44/18862	0.000150058	0.00364428	0.0028009	INHBA/MMP9/HMGA2/LAMB3/MMP14/COL7A1/MMP2/ITGA7/LAMB1/ITGB5	10
BP	GO:0070997	neuron death	37/1079	342/18862	0.000151063	0.00365237	0.00280712	CSF3/TLR4/PTK2B/WNT5A/GRIK5/ITGAM/GATA3/SOD2/SNCG/ADORA1/CCL2/APOE/ITGA1/ADAM8/GDNF/TNFRSF21/NES/NFATC4/CEBPB/TLR6/MAP3K5/NQO1/FADD/ATP13A2/PINK1/FZD9/SNX6/SNCA/PAK3/GCLM/F2R/CASP8/BAD/NLRP1/PARK7/HTRA2/EIF2S1	37
BP	GO:0001822	kidney development	32/1079	280/18862	0.000152419	0.00366885	0.00281979	PECAM1/GREM1/STRA6/SERPINB7/MMP9/AKR1B1/PAX8/CYP26B1/WNT5A/GATA3/GPR4/BMPER/ASS1/LHX1/GDNF/VANGL2/NOG/FMN1/SFRP1/FADD/NKX3-1/SOX9/BICC1/ARG2/WNT7B/FGF2/LAMA5/LIF/SMAD7/HES1/ZNF354A/HYAL2	32
BP	GO:0010499	proteasomal ubiquitin-independent protein catabolic process	7/1079	22/18862	0.000156827	0.00374183	0.00287588	PSMB9/PSMB5/PSMB10/PSMB8/PSMA6/PSMA7/PSMA1	7
BP	GO:0051882	mitochondrial depolarization	7/1079	22/18862	0.000156827	0.00374183	0.00287588	IFI6/PPP2R3C/KDR/MLLT11/CASP1/FZD9/GCLM	7
BP	GO:0002446	neutrophil mediated immunity	49/1079	499/18862	0.000160329	0.00380869	0.00292727	F2RL1/C3/PRSS3/CXCL6/PECAM1/TRPM2/IL6/SNAP25/CXCL1/SERPINB10/HSPA6/VNN1/ANPEP/OSCAR/MMP9/PLAU/CTSS/TLR2/PTX3/CREG1/ITGAM/CDA/RHOF/FTH1/CD14/ADAM8/OLR1/QPCT/NPC2/UNC13D/LGALS3/RAB3A/GGH/IDH1/JUP/AMPD3/ATAD3B/MVP/CYBA/ACAA1/CAB39/AGA/ADGRE5/C1orf35/CD58/ARHGAP45/ANXA3/CD63/CSTB	49
BP	GO:0090288	negative regulation of cellular response to growth factor stimulus	17/1079	110/18862	0.000165448	0.00388965	0.00298949	GREM1/HTRA3/WNT5A/GATA3/XDH/BMPER/THBS1/NOG/SEMA6A/SPRY4/ADAMTS12/SFRP1/SPRY2/NBL1/FGF2/SMAD7/LEMD3	17
BP	GO:0061041	regulation of wound healing	19/1079	131/18862	0.00016622	0.00388965	0.00298949	F2RL1/SERPINF2/SERPINB2/PLAU/CLDN3/PLPP3/C1QTNF1/THBS1/APOE/VKORC1/TNFAIP3/PLAT/SH2B3/FAP/CLDN1/FGF2/SERPINE2/F2R/USF1	19
BP	GO:0007409	axonogenesis	46/1079	460/18862	0.000166366	0.00388965	0.00298949	NRCAM/NRXN1/GAP43/CSF1R/ISLR2/LAMC2/MAP2/WNT5A/CXCL12/SEMA7A/GATA3/ROBO4/SLITRK4/S100A6/CRABP2/ROBO3/ARTN/NRP2/SPTB/LPAR3/MAP6/APOE/LHX1/NRP1/GDNF/PARD6B/NOG/SEMA6A/EFNA1/ATL1/FEZ1/PIK3CD/RAB3A/SH3KBP1/DPYSL5/TUBB2B/ANK3/LAMA5/METRN/TWF2/PAK3/FOXG1/LAMA1/DOK1/NIN/NKX6-1	46
BP	GO:0010466	negative regulation of peptidase activity	30/1079	257/18862	0.000166597	0.00388965	0.00298949	C3/ANXA8L1/SERPINF2/SERPINB2/CARD16/LAMP3/SERPINB10/ANXA8/TIMP3/SERPINB7/MMP9/COL7A1/WFDC3/TIMP1/IFI6/THBS1/COL6A3/HMSD/SPINT2/MAGEA3/PCSK1N/PRDX5/BIN1/SERPINE2/TNFAIP8/SNCA/SPINT1/SERPINB8/PARK7/CSTB	30
BP	GO:0007044	cell-substrate junction assembly	16/1079	100/18862	0.000168878	0.00392604	0.00301746	GREM1/PTK2B/COL16A1/LAMC2/LAMB3/COL17A1/MMP14/ITGA2/THBS1/NRP1/KDR/FMN1/SFRP1/AJUBA/PTPRK/CD151	16
BP	GO:1903039	positive regulation of leukocyte cell-cell adhesion	28/1079	234/18862	0.000178829	0.0041397	0.00318167	DPP4/IL1B/IL6/IL18/VNN1/CD74/IL1A/GATA3/SOCS1/PTPN22/CCDC88B/ICOSLG/EBI3/CCL2/ZP3/ADAM8/TGFBR2/FADD/IL7/IL7R/DUSP10/PAK3/BAD/HLA-A/NFKBIZ/HES1/HLX/IL15	28
BP	GO:0023061	signal release	47/1079	475/18862	0.000181625	0.00418661	0.00321773	F2RL1/SCG5/DPP4/PTGES/IL1B/INHBA/IL6/SNAP25/GPR68/NRXN1/GIP/PAX8/IL11/C1QTNF1/GRIK5/CXCL12/RAPGEF3/GATA3/SYN1/PLA2G4A/PTPRN/TBX3/SNCG/ADORA1/IRS1/STX1A/GDNF/KCNS3/VGF/CAMK2A/SFRP1/NKX3-1/RAB3A/SYT1/SYT11/TSPOAP1/PINK1/LIF/SNCA/F2R/UQCC2/MPC2/BAD/P2RX4/PARK7/PNKD/NKX6-1	47
BP	GO:0001655	urogenital system development	35/1079	320/18862	0.000182453	0.00418794	0.00321875	PECAM1/GREM1/STRA6/SERPINB7/MMP9/AKR1B1/PAX8/CYP26B1/WNT5A/GATA3/GPR4/BMPER/PLAG1/ASS1/LHX1/GDNF/VANGL2/NOG/FMN1/SFRP1/HOXB13/FADD/NKX3-1/SOX9/BICC1/ARG2/WNT7B/FOXA1/FGF2/LAMA5/LIF/SMAD7/HES1/ZNF354A/HYAL2	35
BP	GO:0007584	response to nutrient	22/1079	165/18862	0.000185682	0.00424415	0.00326195	AKR1C3/KYNU/LIPG/VDR/CYP26B1/STC1/ASS1/ITGA2/SOD2/TNFRSF11B/AQP3/DAD1/ATP2B1/TGFBR2/NQO1/SFRP1/HMGCS1/GCLM/IL15/USF1/PHEX/ZNF354A	22
BP	GO:1902107	positive regulation of leukocyte differentiation	21/1079	154/18862	0.000187868	0.00424849	0.00326529	GPR68/IL18/VNN1/CD74/GATA3/MMP14/SOCS1/PPP2R3C/TRIB1/ADAM8/TGFBR2/FADD/IL7/IL7R/DUSP10/LIF/CASP8/BAD/NFKBIZ/HLX/IL15	21
BP	GO:1903708	positive regulation of hemopoiesis	21/1079	154/18862	0.000187868	0.00424849	0.00326529	GPR68/IL18/VNN1/CD74/GATA3/MMP14/SOCS1/PPP2R3C/TRIB1/ADAM8/TGFBR2/FADD/IL7/IL7R/DUSP10/LIF/CASP8/BAD/NFKBIZ/HLX/IL15	21
BP	GO:0045621	positive regulation of lymphocyte differentiation	16/1079	101/18862	0.000190195	0.00424849	0.00326529	IL18/VNN1/CD74/GATA3/MMP14/SOCS1/PPP2R3C/ADAM8/TGFBR2/IL7/IL7R/DUSP10/BAD/NFKBIZ/HLX/IL15	16
BP	GO:0001823	mesonephros development	15/1079	91/18862	0.000190557	0.00424849	0.00326529	GREM1/PAX8/GATA3/BMPER/LHX1/GDNF/NOG/FMN1/SFRP1/SOX9/ARG2/FGF2/LAMA5/SMAD7/HES1	15
BP	GO:0002690	positive regulation of leukocyte chemotaxis	15/1079	91/18862	0.000190557	0.00424849	0.00326529	F2RL1/RARRES2/CXCL8/IL6/PTK2B/CD74/CSF1R/WNT5A/CXCL12/CCL7/PGF/THBS1/GPSM3/VEGFB/TMEM102	15
BP	GO:0006942	regulation of striated muscle contraction	15/1079	91/18862	0.000190557	0.00424849	0.00326529	HCN4/EHD3/STC1/PDE4D/ZC3H12A/ADORA1/CLIC2/PDE4B/ADRA1B/RANGRF/BIN1/JUP/DMD/SMAD7/P2RX4	15
BP	GO:0045071	negative regulation of viral genome replication	11/1079	54/18862	0.00020137	0.00447123	0.00343648	OASL/ISG20/OAS2/HMGA2/TNIP1/APOBEC3G/PARP10/APOBEC3F/ISG15/IFIT1/TRIM6	11
BP	GO:0000302	response to reactive oxygen species	27/1079	224/18862	0.000205281	0.00453955	0.00348899	AKR1C3/TRPM2/IL6/PTK2B/MMP9/GPR37L1/PTPRN/SOD2/APOE/ROMO1/PLK3/MMP2/TNFAIP3/MAP3K5/NQO1/PRDX5/PINK1/RHOB/CYP1B1/PTPRK/BAD/APEX1/PPIF/NET1/PARK7/HYAL2/ERN1	27
BP	GO:0060759	regulation of response to cytokine stimulus	24/1079	189/18862	0.000206764	0.00455383	0.00349996	F2RL1/TLR4/CARD16/IL6/CD74/TLR2/WNT5A/SOCS1/IKBKE/IRAK2/TNFAIP3/GPS2/CCDC3/IL1R1/FADD/LAPTM5/SH2B3/IL7/CASP1/CASP8/SIGIRR/IRF3/TRIM6/IRF7	24
BP	GO:0036363	transforming growth factor beta activation	5/1079	11/18862	0.000209776	0.00460154	0.00353664	NRROS/ITGB8/LTBP1/FKBP1A/LTBP3	5
BP	GO:0035666	TRIF-dependent toll-like receptor signaling pathway	8/1079	30/18862	0.000211181	0.00461375	0.00354602	TLR4/IKBKE/CD14/TLR6/FADD/CASP8/IRF3/IRF7	8
BP	GO:0043491	protein kinase B signaling	31/1079	273/18862	0.000215362	0.00468627	0.00360175	AKR1C3/CSF3/IL1B/IL18/BTC/C1QTNF1/GATA3/FGF17/XDH/THBS1/IRS1/CCL2/ADAM8/PLK3/KDR/FGFR4/PIK3CD/MERTK/NKX3-1/SPRY2/SH2B3/TNFAIP8L3/SOX9/PINK1/FGF2/PHLDA3/RRAS/NRG1/P2RX4/PARK7/HYAL2	31
BP	GO:0006690	icosanoid metabolic process	18/1079	123/18862	0.000218106	0.0046874	0.00360262	AKR1C3/PTGS1/GGT5/PTGES/ALOX5AP/IL1B/CD74/GGT1/TLR2/PLA2G4A/CYP2J2/CYP2S1/MGLL/PTGS2/CYP1B1/MGST3/FADS1/PRXL2B	18
BP	GO:1903409	reactive oxygen species biosynthetic process	18/1079	123/18862	0.000218106	0.0046874	0.00360262	INAVA/TLR4/IL1B/PTK2B/PTX3/ZC3H12A/ASS1/NOX4/SOD2/TLR6/NQO1/ARG2/PTGS2/SNCA/CYP1B1/CYBA/P2RX4/PARK7	18
BP	GO:1990266	neutrophil migration	18/1079	123/18862	0.000218106	0.0046874	0.00360262	CXCL5/DPP4/CXCL6/CXCL8/PECAM1/CXCL1/CXCL2/CD74/CXCL3/CCL7/CCL2/ITGA1/ADAM8/IL1R1/PIK3CD/LGALS3/PDE4B/SRP54	18
BP	GO:0050678	regulation of epithelial cell proliferation	39/1079	374/18862	0.00021886	0.0046874	0.00360262	TLR4/FLT1/TIE1/VDR/WNT5A/CXCL12/GATA3/XDH/PTPRN/PGF/NRP2/THBS1/CCL2/APOE/HOXA5/NRP1/EMC10/KDR/TNFAIP3/ID1/TNFSF12/NOG/VASH1/SFRP1/PIK3CD/NKX3-1/SOX9/TINF2/CLDN1/JCAD/DUSP10/FGF2/LAMB1/VEGFB/PTPRK/BAD/HES1/SAV1/TGFBR3	39
BP	GO:0030323	respiratory tube development	22/1079	167/18862	0.000221154	0.00471796	0.00362611	STRA6/WNT5A/MMP14/HOXA5/NOG/LOXL3/TGFBR2/SPRY2/RAB3A/SOX9/HHIP/WNT7B/FOXA1/FGF2/LAMA5/LIF/LAMA1/LTBP3/HES1/PHEX/SAV1/TRAF4	22
BP	GO:0006953	acute-phase response	10/1079	46/18862	0.000222154	0.00472077	0.00362827	SAA2/PTGES/SERPINF2/IL1B/IL6/IL1A/ASS1/CEBPB/PTGS2/SIGIRR	10
BP	GO:0071692	protein localization to extracellular region	39/1079	375/18862	0.000231163	0.0048931	0.00376072	F2RL1/DPP4/TLR4/IL1B/IL6/SNAP25/GPR68/GIP/IL1A/TLR2/RAPGEF3/PTPRN/STEAP3/NRROS/SNCG/IRS1/APOE/STX1A/ADAM8/RAB13/KCNN4/KCNS3/VGF/LTBP2/MIA2/ARF6/SFRP1/RAB3A/NBL1/ATP13A2/CYP51A1/LTBP1/F2R/UQCC2/MPC2/BAD/PARK7/ERP29/NKX6-1	39
BP	GO:0036294	cellular response to decreased oxygen levels	26/1079	214/18862	0.000235246	0.00496023	0.00381232	CARD16/STC1/PSMB9/PSME2/PSMB5/AQP3/ADAM8/PLK3/PSME1/PSMB10/NDRG1/PSMB8/PSMC6/SFRP1/PSMA6/NKX3-1/PINK1/PTGS2/PMAIP1/CPEB2/AJUBA/PSMA7/PSMA1/BAD/KCNK2/ERO1A	26
BP	GO:1903428	positive regulation of reactive oxygen species biosynthetic process	11/1079	55/18862	0.000238865	0.00500089	0.00384356	TLR4/IL1B/PTK2B/PTX3/ASS1/SOD2/TLR6/PTGS2/CYBA/P2RX4/PARK7	11
BP	GO:0042093	T-helper cell differentiation	12/1079	64/18862	0.000239204	0.00500089	0.00384356	IL18R1/IL6/IL18/ZC3H12A/GATA3/SPN/LOXL3/PTGER4/RELB/SMAD7/NFKBIZ/HLX	12
BP	GO:0070498	interleukin-1-mediated signaling pathway	16/1079	103/18862	0.000239932	0.00500089	0.00384356	IL1B/IL6/IL1A/PSMB9/PSME2/NFKBIA/PSMB5/PSME1/IRAK2/PSMB10/PSMB8/PSMC6/PSMA6/IL1R1/PSMA7/PSMA1	16
BP	GO:0071621	granulocyte chemotaxis	18/1079	124/18862	0.000241765	0.00501985	0.00385813	RARRES2/CXCL5/DPP4/CXCL6/CXCL8/CXCL1/CXCL2/CD74/CSF1R/CXCL3/CCL7/THBS1/CCL2/ITGA1/PIK3CD/LGALS3/PDE4B/SRP54	18
BP	GO:0031146	SCF-dependent proteasomal ubiquitin-dependent protein catabolic process	15/1079	93/18862	0.000243969	0.00504627	0.00387844	FBXO2/PSMB9/PSME2/PSMB5/PSME1/PSMB10/FBXO27/PSMB8/PSMC6/PSMA6/FBXO33/AMN1/FBXO44/PSMA7/PSMA1	15
BP	GO:0043280	positive regulation of cysteine-type endopeptidase activity involved in apoptotic process	19/1079	135/18862	0.000247519	0.00504627	0.00387844	TNFSF15/SOX7/XDH/HSPE1/MAP3K5/FADD/LAPTM5/NKX3-1/CASP1/SNCA/PMAIP1/PDCD5/PML/F2R/CASP8/BAD/FIS1/NLRP1/HTRA2	19
BP	GO:0060048	cardiac muscle contraction	19/1079	135/18862	0.000247519	0.00504627	0.00387844	HCN4/EHD3/STC1/PDE4D/ZC3H12A/ADORA1/CLIC2/TCAP/CACNA1G/PDE4B/ADRA1B/RANGRF/BIN1/JUP/DMD/VEGFB/MAP2K3/SMAD7/P2RX4	19
BP	GO:0072079	nephron tubule formation	6/1079	17/18862	0.000247675	0.00504627	0.00387844	GREM1/PAX8/GATA3/GDNF/NOG/SOX9	6
BP	GO:0090190	positive regulation of branching involved in ureteric bud morphogenesis	6/1079	17/18862	0.000247675	0.00504627	0.00387844	GREM1/PAX8/LHX1/GDNF/NOG/SOX9	6
BP	GO:0009636	response to toxic substance	28/1079	239/18862	0.000255064	0.00516077	0.00396644	PTGS1/DHRS2/PTGES/ALOX5AP/TLR2/GPX3/ASS1/SOD2/ABTB2/CLIC2/APOE/RDH11/NQO1/PRDX5/TXNDC17/CLDN1/PINK1/PTGS2/SCFD1/SRSF9/CYP1B1/PRXL2A/MGST3/SNN/PARK7/PRXL2B/HTRA2/AKR1A1	28
BP	GO:0072001	renal system development	32/1079	288/18862	0.000255192	0.00516077	0.00396644	PECAM1/GREM1/STRA6/SERPINB7/MMP9/AKR1B1/PAX8/CYP26B1/WNT5A/GATA3/GPR4/BMPER/ASS1/LHX1/GDNF/VANGL2/NOG/FMN1/SFRP1/FADD/NKX3-1/SOX9/BICC1/ARG2/WNT7B/FGF2/LAMA5/LIF/SMAD7/HES1/ZNF354A/HYAL2	32
BP	GO:0040013	negative regulation of locomotion	39/1079	377/18862	0.000257647	0.00519111	0.00398976	DPP4/GREM1/TIE1/CD74/IL24/KRT16/CLDN3/STC1/WNT5A/CXCL12/SEMA7A/GATA3/TIMP1/THBS1/PTPRR/ADORA1/PTPRU/CCL2/APOE/TRIB1/NRP1/SPINT2/NOG/SEMA6A/VASH1/SFRP1/PTGER4/DUSP10/NBL1/FGF2/JUP/RHOB/RRAS/CYP1B1/ADAM15/PTPRK/SMAD7/APEX1/HYAL2	39
BP	GO:0061045	negative regulation of wound healing	13/1079	74/18862	0.000262899	0.00527737	0.00405606	SERPINF2/SERPINB2/PLAU/CLDN3/C1QTNF1/THBS1/APOE/PLAT/SH2B3/FAP/FGF2/SERPINE2/USF1	13
BP	GO:0015872	dopamine transport	10/1079	47/18862	0.000267896	0.00531125	0.0040821	CXCL12/SNCG/GDNF/SLC22A3/RAB3A/SYT1/SYT11/PINK1/SNCA/PARK7	10
BP	GO:0030574	collagen catabolic process	10/1079	47/18862	0.000267896	0.00531125	0.0040821	COL15A1/MMP7/MMP9/CTSS/MMP14/MMP2/MMP17/FAP/ADAM15/ADAMTS3	10
BP	GO:0010038	response to metal ion	37/1079	352/18862	0.000268492	0.00531125	0.0040821	AKR1C3/CPNE8/PTGES/ALOX5AP/TRPM2/PTK2B/MMP9/IL1A/WNT5A/ASS1/SOD2/THBS1/TNFRSF11B/AQP3/CD14/NFATC4/CYP2R1/NDRG1/QDPR/NQO1/CACNA1G/S100A16/SYT1/GGH/CLDN1/SYT11/ANK3/ATP13A2/SNCA/CASP8/BAD/DTYMK/PPIF/P2RX4/PARK7/SLC11A2/EIF2S1	37
BP	GO:0051271	negative regulation of cellular component movement	37/1079	352/18862	0.000268492	0.00531125	0.0040821	DPP4/GREM1/TIE1/CD74/IL24/KRT16/CLDN3/STC1/CXCL12/GATA3/TIMP1/THBS1/PTPRR/ADORA1/PTPRU/CCL2/APOE/TRIB1/SPINT2/NOG/VASH1/SFRP1/PTGER4/DUSP10/NBL1/FGF2/BIN1/JUP/RHOB/RRAS/CYP1B1/ADAM15/PTPRK/SMAD7/APEX1/TGFBR3/HYAL2	37
BP	GO:0001516	prostaglandin biosynthetic process	8/1079	31/18862	0.000270479	0.00531193	0.00408262	AKR1C3/PTGS1/PTGES/IL1B/CD74/PLA2G4A/PTGS2/PRXL2B	8
BP	GO:0046457	prostanoid biosynthetic process	8/1079	31/18862	0.000270479	0.00531193	0.00408262	AKR1C3/PTGS1/PTGES/IL1B/CD74/PLA2G4A/PTGS2/PRXL2B	8
BP	GO:0010822	positive regulation of mitochondrion organization	14/1079	84/18862	0.000274084	0.00534415	0.00410738	MMP9/CHCHD10/BMF/KDR/MLLT11/PINK1/PMAIP1/PDCD5/CASP8/BAD/FIS1/PPIF/PARK7/HTRA2	14
BP	GO:0046330	positive regulation of JNK cascade	14/1079	84/18862	0.000274084	0.00534415	0.00410738	F2RL1/SERPINF2/TLR4/IL1B/PTK2B/WNT16/DUSP15/WNT5A/SH3RF3/MAP3K5/WNT7B/RASSF2/TRAF4/MAP4K2	14
BP	GO:1990748	cellular detoxification	17/1079	115/18862	0.000285828	0.00555323	0.00426808	PTGS1/PTGES/ALOX5AP/GPX3/SOD2/CLIC2/APOE/RDH11/NQO1/PRDX5/TXNDC17/PTGS2/PRXL2A/MGST3/PARK7/PRXL2B/AKR1A1	17
BP	GO:0048710	regulation of astrocyte differentiation	7/1079	24/18862	0.00028778	0.00557126	0.00428194	IL6/GPR37L1/NOG/BIN1/LIF/SERPINE2/HES1	7
BP	GO:0034614	cellular response to reactive oxygen species	21/1079	159/18862	0.000293769	0.00566703	0.00435554	AKR1C3/TRPM2/IL6/MMP9/GPR37L1/SOD2/ROMO1/MMP2/TNFAIP3/MAP3K5/NQO1/PRDX5/PINK1/RHOB/CYP1B1/PTPRK/APEX1/PPIF/NET1/PARK7/ERN1	21
BP	GO:0002479	antigen processing and presentation of exogenous peptide antigen via MHC class I, TAP-dependent	13/1079	75/18862	0.000301629	0.0057981	0.00445628	PSMB9/PSME2/PSMB5/PSME1/PSMB10/PSMB8/PSMC6/PSMA6/PSMA7/CYBA/ITGB5/PSMA1/HLA-A	13
BP	GO:0060425	lung morphogenesis	10/1079	48/18862	0.000321257	0.00611062	0.00469647	HOXA5/NOG/TGFBR2/SPRY2/SOX9/HHIP/WNT7B/FOXA1/LIF/LAMA1	10
BP	GO:0061028	establishment of endothelial barrier	10/1079	48/18862	0.000321257	0.00611062	0.00469647	F2RL1/PECAM1/IL1B/CLDN3/PDE4D/RAPGEF3/ROBO4/CLDN1/WNT7B/F11R	10
BP	GO:1904894	positive regulation of receptor signaling pathway via STAT	10/1079	48/18862	0.000321257	0.00611062	0.00469647	OCIAD2/IL6/PTK2B/AKR1B1/SOCS1/PRLR/IL7R/CYP1B1/F2R/HES1	10
BP	GO:0002294	CD4-positive, alpha-beta T cell differentiation involved in immune response	12/1079	66/18862	0.000322712	0.00611692	0.00470131	IL18R1/IL6/IL18/ZC3H12A/GATA3/SPN/LOXL3/PTGER4/RELB/SMAD7/NFKBIZ/HLX	12
BP	GO:0046631	alpha-beta T cell activation	20/1079	149/18862	0.000327007	0.0061768	0.00474734	IL18R1/IL6/IL18/PRDM1/ZC3H12A/GATA3/SOCS1/SPN/PTPN22/EBI3/LOXL3/TGFBR2/PTGER4/ARG2/RELB/SMAD7/HLA-A/NFKBIZ/HLX/IL15	20
BP	GO:0010594	regulation of endothelial cell migration	27/1079	231/18862	0.000338418	0.00637023	0.004896	PTK2B/SH3BP1/PLPP3/STC1/WNT5A/ZC3H12A/GATA3/BMPER/NRP2/THBS1/SRPX2/APOE/NRP1/EMC10/KDR/EFNA1/VASH1/PIK3CD/JCAD/FGF2/PTGS2/JUP/RHOB/RRAS/MAP2K3/P2RX4/ANXA3	27
BP	GO:0010719	negative regulation of epithelial to mesenchymal transition	9/1079	40/18862	0.000346799	0.00648311	0.00498276	GATA3/NOG/EFNA1/SFRP1/SPRY2/FOXA1/DACT3/SDHAF2/SMAD7	9
BP	GO:0070423	nucleotide-binding oligomerization domain containing signaling pathway	9/1079	40/18862	0.000346799	0.00648311	0.00498276	INAVA/TLR4/SLC15A3/PTPN22/NFKBIA/IRAK2/TNFAIP3/CASP8/LACC1	9
BP	GO:0002244	hematopoietic progenitor cell differentiation	21/1079	161/18862	0.000348955	0.00648737	0.00498604	RBM47/OCIAD2/INHBA/FLT1/CSF1R/MEOX1/GATA3/PSMB9/PSME2/PSMB5/KDR/PSME1/PSMB10/PSMB8/PSMC6/SFRP1/PSMA6/PSMA7/PSMA1/HES1/HYAL2	21
BP	GO:0032755	positive regulation of interleukin-6 production	14/1079	86/18862	0.000352415	0.00648737	0.00498604	F2RL1/INAVA/TLR4/IL1B/IL6/CD74/POU2F2/IL1A/TLR2/WNT5A/TLR6/F2R/CYBA/HYAL2	14
BP	GO:0035743	CD4-positive, alpha-beta T cell cytokine production	6/1079	18/18862	0.000353607	0.00648737	0.00498604	IL18R1/IL1B/IL6/IL18/GATA3/IL1R1	6
BP	GO:0046851	negative regulation of bone remodeling	6/1079	18/18862	0.000353607	0.00648737	0.00498604	TMEM119/GREM1/IL6/TNFRSF11B/TNFAIP3/SFRP1	6
BP	GO:2000696	regulation of epithelial cell differentiation involved in kidney development	6/1079	18/18862	0.000353607	0.00648737	0.00498604	MMP9/PAX8/GATA3/LHX1/GDNF/LIF	6
BP	GO:0042176	regulation of protein catabolic process	39/1079	383/18862	0.000354182	0.00648737	0.00498604	TRIB2/IL1B/LAMP3/PTK2B/TIMP3/WNT5A/ASB9/TIMP1/PSME2/APOE/RILP/TRIB1/ADAM8/PLK3/PSME1/TNFAIP3/TNFSF12/EFNA1/LAPTM5/SOX9/AZIN2/ATP13A2/CYP51A1/PINK1/SERPINE2/RCHY1/SNCA/PML/ATRAID/DACT1/UQCC2/DDRGK1/SMAD7/HECTD1/PACSIN3/DNAJB2/PARK7/TMEM9/TRIM39	39
BP	GO:0002287	alpha-beta T cell activation involved in immune response	12/1079	67/18862	0.000372969	0.0067858	0.0052154	IL18R1/IL6/IL18/ZC3H12A/GATA3/SPN/LOXL3/PTGER4/RELB/SMAD7/NFKBIZ/HLX	12
BP	GO:0002293	alpha-beta T cell differentiation involved in immune response	12/1079	67/18862	0.000372969	0.0067858	0.0052154	IL18R1/IL6/IL18/ZC3H12A/GATA3/SPN/LOXL3/PTGER4/RELB/SMAD7/NFKBIZ/HLX	12
BP	GO:0042730	fibrinolysis	7/1079	25/18862	0.000380098	0.00686954	0.00527976	SERPINF2/SERPINB2/PLAU/THBS1/PLAT/FAP/USF1	7
BP	GO:0060740	prostate gland epithelium morphogenesis	7/1079	25/18862	0.000380098	0.00686954	0.00527976	WNT5A/NOG/SFRP1/HOXB13/NKX3-1/SOX9/FOXA1	7
BP	GO:0034341	response to interferon-gamma	24/1079	197/18862	0.000385951	0.00691849	0.00531738	OASL/KYNU/TLR4/CD74/TLR2/OAS2/WNT5A/CCL7/ASS1/SOCS1/CCL2/CAMK2A/GBP5/CLDN1/CASP1/SNCA/PML/GBP2/IRF3/HLA-A/SLC26A6/CD58/CDC42EP4/IRF7	24
BP	GO:0060675	ureteric bud morphogenesis	11/1079	58/18862	0.0003885	0.00691849	0.00531738	GREM1/PAX8/GATA3/LHX1/GDNF/NOG/FMN1/SOX9/FGF2/LAMA5/HES1	11
BP	GO:0060070	canonical Wnt signaling pathway	35/1079	333/18862	0.000388958	0.00691849	0.00531738	GREM1/SOX7/WNT16/PLPP3/WNT5A/CTHRC1/GATA3/PSMB9/PSME2/PSMB5/PTPRU/APOE/PSME1/PSMB10/NOG/PSMB8/IGFBP4/PSMC6/SFRP1/PSMA6/SOX9/BICC1/WNT7B/FZD9/JUP/TCF7/DACT3/SDHAF2/TLE3/DACT1/PSMA7/PSMA1/IGFBP6/TMEM9/FZD8	35
BP	GO:0051651	maintenance of location in cell	25/1079	209/18862	0.000389987	0.00691849	0.00531738	TRPM2/PTK2B/JPH4/TMSB4Y/PDE4D/GRIK5/P2RY6/CHCHD10/FTH1/CLIC2/APOE/INSIG1/ANK3/PINK1/FGF2/TWF2/FKBP1A/SNCA/DMD/PML/F2R/TPCN1/ANXA6/PARK7/ERO1A	25
BP	GO:2001056	positive regulation of cysteine-type endopeptidase activity	20/1079	151/18862	0.000390368	0.00691849	0.00531738	TNFSF15/SOX7/XDH/HSPE1/MAP3K5/FADD/LAPTM5/NKX3-1/TBC1D10A/CASP1/SNCA/PMAIP1/PDCD5/PML/F2R/CASP8/BAD/FIS1/NLRP1/HTRA2	20
BP	GO:0032677	regulation of interleukin-8 production	15/1079	97/18862	0.000390437	0.00691849	0.00531738	F2RL1/TLR4/IL1B/IL6/CD74/TLR2/WNT5A/PTPN22/CD14/TLR6/FADD/F2R/CD58/PARK7/HYAL2	15
BP	GO:0045861	negative regulation of proteolysis	36/1079	346/18862	0.000392128	0.0069259	0.00532308	C3/ANXA8L1/SERPINF2/SERPINB2/CARD16/LAMP3/SERPINB10/ANXA8/TIMP3/SERPINB7/MMP9/COL7A1/WFDC3/TIMP1/IFI6/THBS1/COL6A3/HMSD/SPINT2/MAGEA3/EFNA1/PCSK1N/PRDX5/PLAT/BIN1/SERPINE2/TNFAIP8/SNCA/PML/SPINT1/CLN8/DDRGK1/SERPINB8/PARK7/CSTB/TRIM39	36
BP	GO:0046209	nitric oxide metabolic process	13/1079	77/18862	0.000393836	0.00693356	0.00532897	TLR4/IL1B/PTK2B/TLR2/PTX3/ZC3H12A/ASS1/TLR6/NQO1/ARG2/PTGS2/CYP1B1/P2RX4	13
BP	GO:0051899	membrane depolarization	14/1079	87/18862	0.000398277	0.00698912	0.00537167	HCN4/IFI6/PPP2R3C/KDR/MLLT11/CACNA1G/RANGRF/ANK3/CASP1/FZD9/GCLM/SMAD7/P2RX4/PARK7	14
BP	GO:0030324	lung development	21/1079	163/18862	0.000412994	0.00722407	0.00555225	STRA6/WNT5A/MMP14/HOXA5/NOG/LOXL3/TGFBR2/SPRY2/RAB3A/SOX9/HHIP/WNT7B/FOXA1/FGF2/LAMA5/LIF/LAMA1/LTBP3/HES1/PHEX/SAV1	21
BP	GO:0060071	Wnt signaling pathway, planar cell polarity pathway	16/1079	108/18862	0.000416174	0.00725636	0.00557706	WNT5A/CTHRC1/PSMB9/PSME2/PSMB5/VANGL2/PSME1/PSMB10/PSMB8/PSMC6/SFRP1/PSMA6/DACT1/PRICKLE2/PSMA7/PSMA1	16
BP	GO:0035872	nucleotide-binding domain, leucine rich repeat containing receptor signaling pathway	9/1079	41/18862	0.00042204	0.00733513	0.00563761	INAVA/TLR4/SLC15A3/PTPN22/NFKBIA/IRAK2/TNFAIP3/CASP8/LACC1	9
BP	GO:0002724	regulation of T cell cytokine production	8/1079	33/18862	0.000429919	0.00737779	0.00567039	IL18R1/IL1B/IL6/IL18/GATA3/IL1R1/SMAD7/HLA-A	8
BP	GO:0014046	dopamine secretion	8/1079	33/18862	0.000429919	0.00737779	0.00567039	CXCL12/SNCG/GDNF/RAB3A/SYT1/SYT11/PINK1/SNCA	8
BP	GO:0014059	regulation of dopamine secretion	8/1079	33/18862	0.000429919	0.00737779	0.00567039	CXCL12/SNCG/GDNF/RAB3A/SYT1/SYT11/PINK1/SNCA	8
BP	GO:0086004	regulation of cardiac muscle cell contraction	8/1079	33/18862	0.000429919	0.00737779	0.00567039	HCN4/STC1/PDE4D/ADORA1/PDE4B/RANGRF/BIN1/JUP	8
BP	GO:0070373	negative regulation of ERK1 and ERK2 cascade	13/1079	78/18862	0.000448271	0.00763534	0.00586834	TLR4/TIMP3/DUSP4/NDRG2/DUSP6/PTPRR/TNIP1/SEMA6A/SPRY4/SPRY2/DUSP10/LIF/RGS14	13
BP	GO:2001057	reactive nitrogen species metabolic process	13/1079	78/18862	0.000448271	0.00763534	0.00586834	TLR4/IL1B/PTK2B/TLR2/PTX3/ZC3H12A/ASS1/TLR6/NQO1/ARG2/PTGS2/CYP1B1/P2RX4	13
BP	GO:0060218	hematopoietic stem cell differentiation	14/1079	88/18862	0.000449138	0.00763534	0.00586834	OCIAD2/MEOX1/GATA3/PSMB9/PSME2/PSMB5/PSME1/PSMB10/PSMB8/PSMC6/SFRP1/PSMA6/PSMA7/PSMA1	14
BP	GO:0043030	regulation of macrophage activation	11/1079	59/18862	0.000453208	0.0076501	0.00587968	TLR4/IL6/CD74/WNT5A/ZC3H12A/LRFN5/PLA2G4A/THBS1/IL31RA/TLR6/SYT11	11
BP	GO:0072171	mesonephric tubule morphogenesis	11/1079	59/18862	0.000453208	0.0076501	0.00587968	GREM1/PAX8/GATA3/LHX1/GDNF/NOG/FMN1/SOX9/FGF2/LAMA5/HES1	11
BP	GO:0002696	positive regulation of leukocyte activation	40/1079	401/18862	0.000454225	0.0076501	0.00587968	F2RL1/DPP4/KLRC2/TLR4/IL1B/IL6/IL18/VNN1/CD74/IL1A/WNT5A/ITGAM/GATA3/PLA2G4A/MMP14/SOCS1/PTPN22/THBS1/CCDC88B/ICOSLG/EBI3/CCL2/ZP3/PPP2R3C/ADAM8/NFATC2/TLR6/TGFBR2/FADD/IL7/SH3KBP1/IL7R/DUSP10/PAK3/BAD/HLA-A/NFKBIZ/HES1/HLX/IL15	40
BP	GO:0035567	non-canonical Wnt signaling pathway	20/1079	153/18862	0.000464159	0.00779328	0.00598973	GNG2/WNT5A/CTHRC1/PSMB9/PSME2/PSMB5/VANGL2/PSME1/PSMB10/PSMB8/CAMK2A/PSMC6/SFRP1/PSMA6/FZD9/DACT1/PRICKLE2/PSMA7/PSMA1/FZD8	20
BP	GO:0060541	respiratory system development	23/1079	188/18862	0.000476224	0.00797125	0.00612651	STRA6/MSC/WNT5A/MMP14/ASS1/HOXA5/NOG/LOXL3/TGFBR2/SPRY2/RAB3A/SOX9/HHIP/WNT7B/FOXA1/FGF2/LAMA5/LIF/LAMA1/LTBP3/HES1/PHEX/SAV1	23
BP	GO:0072073	kidney epithelium development	18/1079	131/18862	0.000479383	0.00799953	0.00614824	PECAM1/GREM1/PAX8/GATA3/BMPER/LHX1/GDNF/NOG/FMN1/SFRP1/SOX9/ARG2/WNT7B/FGF2/LAMA5/LIF/SMAD7/HES1	18
BP	GO:2001234	negative regulation of apoptotic signaling pathway	26/1079	224/18862	0.000481128	0.00800409	0.00615175	IL1B/CSF2/VNN1/CD74/MMP9/IL1A/CXCL12/IFI6/SOD2/THBS1/GDNF/TNFAIP3/BCL2L2/NOG/MAGEA3/FADD/LGALS3/IL7/PINK1/FZD9/GCLM/CASP8/PPIF/PARK7/HTRA2/SNAI1	26
BP	GO:0002702	positive regulation of production of molecular mediator of immune response	15/1079	99/18862	0.000488393	0.00810018	0.0062256	IL18R1/F2RL1/TLR4/IL1B/IL6/IL18/CD74/WNT5A/SEMA7A/GATA3/PTPN22/IL1R1/LAPTM5/TRIM6/HLA-A	15
BP	GO:0051900	regulation of mitochondrial depolarization	6/1079	19/18862	0.000491929	0.00813402	0.00625161	IFI6/PPP2R3C/KDR/MLLT11/FZD9/GCLM	6
BP	GO:0072088	nephron epithelium morphogenesis	12/1079	69/18862	0.000493504	0.00813534	0.00625263	GREM1/PAX8/GATA3/LHX1/GDNF/NOG/FMN1/SOX9/FGF2/LAMA5/LIF/HES1	12
BP	GO:0001959	regulation of cytokine-mediated signaling pathway	22/1079	177/18862	0.000503305	0.00824692	0.00633838	F2RL1/CARD16/IL6/CD74/WNT5A/SOCS1/IKBKE/IRAK2/TNFAIP3/GPS2/CCDC3/IL1R1/FADD/LAPTM5/SH2B3/IL7/CASP1/CASP8/SIGIRR/IRF3/TRIM6/IRF7	22
BP	GO:2001257	regulation of cation channel activity	22/1079	177/18862	0.000503305	0.00824692	0.00633838	EHD3/PTK2B/JPH4/NETO1/CNIH3/MMP9/RASGRF1/CTSS/PDE4D/P2RY6/RRAD/CLIC2/CCL2/CACNG7/ADRB2/PDE4B/ANK3/PINK1/FKBP1A/DMD/RGS9/NETO2	22
BP	GO:2001239	regulation of extrinsic apoptotic signaling pathway in absence of ligand	9/1079	42/18862	0.000510207	0.00833491	0.00640601	SRPX/IL1B/INHBA/CSF2/IL1A/IFI6/GDNF/IL7/HTRA2	9
BP	GO:0030879	mammary gland development	18/1079	132/18862	0.000526029	0.00856693	0.00658434	CSF1R/ELF3/NOTCH4/OAS2/WNT5A/GATA3/XDH/TBX3/ITGA2/PRLR/HOXA5/CEBPB/TGFBR2/SOX9/WNT7B/ARHGAP5/PML/NRG1	18
BP	GO:0007171	activation of transmembrane receptor protein tyrosine kinase activity	5/1079	13/18862	0.000530709	0.00856693	0.00658434	GREM1/PRLR/ADRB2/PDGFC/NRG1	5
BP	GO:0032905	transforming growth factor beta1 production	5/1079	13/18862	0.000530709	0.00856693	0.00658434	LUM/SERPINB7/NRROS/THBS1/FKBP1A	5
BP	GO:0033605	positive regulation of catecholamine secretion	5/1079	13/18862	0.000530709	0.00856693	0.00658434	CXCL12/STX1A/GDNF/SYT1/PINK1	5
BP	GO:0097300	programmed necrotic cell death	10/1079	51/18862	0.00053709	0.00861882	0.00662422	TLR4/CD14/MAP3K5/FADD/CASP1/FZD9/CASP8/IRF3/PPIF/MLKL	10
BP	GO:0006790	sulfur compound metabolic process	38/1079	378/18862	0.000537092	0.00861882	0.00662422	LUM/KYNU/NDST3/GGT5/GGT1/CLIC3/TPK1/CSGALNACT1/NOX4/DGAT2/CHSY3/MTHFD2L/CLIC2/SQOR/CHST11/NUBPL/ACOT1/ISCA2/THTPA/B4GAT1/CHST7/CHST2/PMVK/ACOT2/PPT2/DSE/IDH1/PAPSS1/HMGCS1/GCLM/ISCU/MPC2/HS3ST3B1/MGST3/ADO/PARK7/AKR1A1/IDS	38
BP	GO:0043312	neutrophil degranulation	46/1079	485/18862	0.00053984	0.00863267	0.00663487	C3/PRSS3/PECAM1/TRPM2/SNAP25/CXCL1/SERPINB10/HSPA6/VNN1/ANPEP/OSCAR/MMP9/PLAU/CTSS/TLR2/PTX3/CREG1/ITGAM/CDA/RHOF/FTH1/CD14/ADAM8/OLR1/QPCT/NPC2/UNC13D/LGALS3/RAB3A/GGH/IDH1/JUP/AMPD3/ATAD3B/MVP/CYBA/ACAA1/CAB39/AGA/ADGRE5/C1orf35/CD58/ARHGAP45/ANXA3/CD63/CSTB	46
BP	GO:0006936	muscle contraction	36/1079	352/18862	0.00054128	0.00863267	0.00663487	HCN4/EHD3/STC1/PDE4D/ZC3H12A/TBX3/ITGA2/ADORA1/HTR7/CLIC2/ITGA1/SSTR2/PABPN1/GDNF/ATP2B1/TCAP/ADRB2/EDNRA/CACNA1G/PDE4B/ADRA1B/RANGRF/ARG2/MYL6/DOCK4/BIN1/JUP/MYL6B/DMD/F2R/VEGFB/MAP2K3/ITGB5/SMAD7/P2RX4/ANXA6	36
BP	GO:0051924	regulation of calcium ion transport	27/1079	238/18862	0.000542716	0.00863267	0.00663487	EHD3/PTK2B/JPH4/STC1/PDE4D/P2RY6/CXCL12/RRAD/CLIC2/LPAR3/PLPP4/CCL2/ATP2B1/CAMK2A/LGALS3/PDE4B/BIN1/BEST1/FKBP1A/SNCA/DMD/PML/F2R/SARAF/RGS9/PACSIN3/P2RX4	27
BP	GO:0035710	CD4-positive, alpha-beta T cell activation	15/1079	100/18862	0.000544778	0.00864021	0.00664066	IL18R1/IL6/IL18/ZC3H12A/GATA3/SOCS1/SPN/LOXL3/TGFBR2/PTGER4/ARG2/RELB/SMAD7/NFKBIZ/HLX	15
BP	GO:0048608	reproductive structure development	40/1079	405/18862	0.000553251	0.00872642	0.00670692	AKR1C3/C3/INHBA/STRA6/CSF2/VDR/STC1/PTX3/WNT5A/GATA3/MMP14/PTPRN/PLAG1/TBX3/ZP3/LHX1/RAB13/CEBPB/SPINT2/VGF/NOG/PHLDA2/VASH1/SFRP1/HOXB13/MERTK/ITGB8/NKX3-1/SOX9/WNT7B/FOXA1/LIF/SERPINE2/IDH1/HMGCS1/SPINT1/CASP8/ADAM15/HES1/SNAI1	40
BP	GO:0071674	mononuclear cell migration	23/1079	190/18862	0.000553422	0.00872642	0.00670692	RARRES2/PECAM1/GREM1/TRPM2/IL6/FLT1/PTK2B/CSF1R/WNT5A/CXCL12/CCL7/GATA3/SPN/ARTN/THBS1/CCL2/ADAM8/PIK3CD/FADD/LGALS3/NBL1/F11R/TMEM102	23
BP	GO:0009612	response to mechanical stimulus	24/1079	202/18862	0.000557273	0.00876175	0.00673407	TLR4/IL1B/STRA6/NRXN1/PTK2B/MMP7/CXCL12/MMP14/ITGA2/THBS1/NFKBIA/TCAP/TGFBR2/FADD/PTGER4/SOX9/CASP1/SERPINE2/JUP/DMD/CASP8/BAD/F11R/KCNK2	24
BP	GO:0001738	morphogenesis of a polarized epithelium	19/1079	144/18862	0.000566474	0.00885558	0.00680618	SH3BP1/WNT5A/CTHRC1/PSMB9/PSME2/PSMB5/VANGL2/PSME1/PSMB10/PSMB8/PSMC6/SFRP1/PSMA6/LAMA5/LAMA1/DACT1/PRICKLE2/PSMA7/PSMA1	19
BP	GO:0070301	cellular response to hydrogen peroxide	14/1079	90/18862	0.000567609	0.00885558	0.00680618	TRPM2/IL6/GPR37L1/TNFAIP3/MAP3K5/NQO1/PINK1/RHOB/CYP1B1/APEX1/PPIF/NET1/PARK7/ERN1	14
BP	GO:0002286	T cell activation involved in immune response	16/1079	111/18862	0.000568125	0.00885558	0.00680618	IL18R1/F2RL1/IL6/IL18/CD74/ZC3H12A/GATA3/LCP1/SPN/LOXL3/LGALS3/PTGER4/RELB/SMAD7/NFKBIZ/HLX	16
BP	GO:0042590	antigen processing and presentation of exogenous peptide antigen via MHC class I	13/1079	80/18862	0.00057644	0.00895952	0.00688607	PSMB9/PSME2/PSMB5/PSME1/PSMB10/PSMB8/PSMC6/PSMA6/PSMA7/CYBA/ITGB5/PSMA1/HLA-A	13
BP	GO:0046165	alcohol biosynthetic process	20/1079	156/18862	0.00059749	0.00926024	0.0071172	SPTLC3/PTK2B/IP6K3/AKR1B1/P2RY6/APOE/CYP2R1/QDPR/INSIG1/CYP51A1/FGF2/PMVK/SQLE/SNCA/MSMO1/HMGCS1/IDI1/PGP/HSD17B7/PARK7	20
BP	GO:0030858	positive regulation of epithelial cell differentiation	11/1079	61/18862	0.000609872	0.00939859	0.00722353	PAX8/VDR/LHX1/ETV4/GDNF/TRIM16/SOX9/FGF2/LIF/BAD/NKX6-1	11
BP	GO:0070542	response to fatty acid	11/1079	61/18862	0.000609872	0.00939859	0.00722353	AKR1C3/TLR2/ZC3H12A/ASS1/DGAT2/IRS1/NFATC4/SOX9/CLDN1/BAD/PID1	11
BP	GO:0010720	positive regulation of cell development	31/1079	290/18862	0.000614584	0.00943989	0.00725527	IL1B/IL6/GPR68/RASSF10/ISLR2/TLR2/CXCL12/SEMA7A/PLAG1/CRABP2/LPAR3/MAP6/TRIB1/NRP1/UNC13D/BIN1/METRN/LIF/SERPINE2/TWF2/PRMT5/PAK3/FOXG1/SPINT1/NIN/SMAD7/BAD/HES1/RGS14/F11R/NKX6-1	31
BP	GO:0002283	neutrophil activation involved in immune response	46/1079	488/18862	0.000616022	0.00943989	0.00725527	C3/PRSS3/PECAM1/TRPM2/SNAP25/CXCL1/SERPINB10/HSPA6/VNN1/ANPEP/OSCAR/MMP9/PLAU/CTSS/TLR2/PTX3/CREG1/ITGAM/CDA/RHOF/FTH1/CD14/ADAM8/OLR1/QPCT/NPC2/UNC13D/LGALS3/RAB3A/GGH/IDH1/JUP/AMPD3/ATAD3B/MVP/CYBA/ACAA1/CAB39/AGA/ADGRE5/C1orf35/CD58/ARHGAP45/ANXA3/CD63/CSTB	46
BP	GO:0090175	regulation of establishment of planar polarity	16/1079	112/18862	0.000628336	0.00960154	0.00737951	WNT5A/CTHRC1/PSMB9/PSME2/PSMB5/VANGL2/PSME1/PSMB10/PSMB8/PSMC6/SFRP1/PSMA6/DACT1/PRICKLE2/PSMA7/PSMA1	16
BP	GO:0002675	positive regulation of acute inflammatory response	7/1079	27/18862	0.000635103	0.00965073	0.00741732	C3/IL1B/IL6/ZP3/ADAM8/PTGS2/PARK7	7
BP	GO:0060512	prostate gland morphogenesis	7/1079	27/18862	0.000635103	0.00965073	0.00741732	WNT5A/NOG/SFRP1/HOXB13/NKX3-1/SOX9/FOXA1	7
BP	GO:0061458	reproductive system development	40/1079	408/18862	0.000639655	0.00969282	0.00744967	AKR1C3/C3/INHBA/STRA6/CSF2/VDR/STC1/PTX3/WNT5A/GATA3/MMP14/PTPRN/PLAG1/TBX3/ZP3/LHX1/RAB13/CEBPB/SPINT2/VGF/NOG/PHLDA2/VASH1/SFRP1/HOXB13/MERTK/ITGB8/NKX3-1/SOX9/WNT7B/FOXA1/LIF/SERPINE2/IDH1/HMGCS1/SPINT1/CASP8/ADAM15/HES1/SNAI1	40
BP	GO:0051881	regulation of mitochondrial membrane potential	12/1079	71/18862	0.000645256	0.00972353	0.00747327	IFI6/PPP2R3C/KDR/MLLT11/PINK1/CASP1/FZD9/PMAIP1/GCLM/BAD/PID1/PARK7	12
BP	GO:0072028	nephron morphogenesis	12/1079	71/18862	0.000645256	0.00972353	0.00747327	GREM1/PAX8/GATA3/LHX1/GDNF/NOG/FMN1/SOX9/FGF2/LAMA5/LIF/HES1	12
BP	GO:0022617	extracellular matrix disassembly	13/1079	81/18862	0.000651331	0.009761	0.00750207	DPP4/IL6/MMP7/MMP9/CTSS/MMP14/LCP1/TIMP1/ADAM8/MMP2/FGFR4/FAP/ADAM15	13
BP	GO:0043367	CD4-positive, alpha-beta T cell differentiation	13/1079	81/18862	0.000651331	0.009761	0.00750207	IL18R1/IL6/IL18/ZC3H12A/GATA3/SOCS1/SPN/LOXL3/PTGER4/RELB/SMAD7/NFKBIZ/HLX	13
BP	GO:0040036	regulation of fibroblast growth factor receptor signaling pathway	8/1079	35/18862	0.000658277	0.00983799	0.00756124	WNT5A/GATA3/THBS1/NOG/SPRY4/SPRY2/HHIP/FGF2	8
BP	GO:0071214	cellular response to abiotic stimulus	34/1079	330/18862	0.000668627	0.00986146	0.00757928	TLR4/IL1B/CARD16/GPR68/MMP7/MMP9/AKR1B1/HMGA2/GATA3/NOX4/OPN3/TIMP1/ITGA2/BMF/RPL26/MMP2/NFATC4/SFRP1/FADD/LRRC8C/PTGER4/SOX9/CASP1/RHOB/CASP8/RELB/PTPRK/CAB39/BAD/MBIP/F11R/NET1/HYAL2/EIF2S1	34
BP	GO:0104004	cellular response to environmental stimulus	34/1079	330/18862	0.000668627	0.00986146	0.00757928	TLR4/IL1B/CARD16/GPR68/MMP7/MMP9/AKR1B1/HMGA2/GATA3/NOX4/OPN3/TIMP1/ITGA2/BMF/RPL26/MMP2/NFATC4/SFRP1/FADD/LRRC8C/PTGER4/SOX9/CASP1/RHOB/CASP8/RELB/PTPRK/CAB39/BAD/MBIP/F11R/NET1/HYAL2/EIF2S1	34
BP	GO:0034104	negative regulation of tissue remodeling	6/1079	20/18862	0.000668962	0.00986146	0.00757928	TMEM119/GREM1/IL6/TNFRSF11B/TNFAIP3/SFRP1	6
BP	GO:0043011	myeloid dendritic cell differentiation	6/1079	20/18862	0.000668962	0.00986146	0.00757928	DHRS2/CSF2/BATF3/TGFBR2/ITGB8/RELB	6
BP	GO:0090189	regulation of branching involved in ureteric bud morphogenesis	6/1079	20/18862	0.000668962	0.00986146	0.00757928	GREM1/PAX8/LHX1/GDNF/NOG/SOX9	6
BP	GO:0042116	macrophage activation	15/1079	102/18862	0.00067435	0.00986146	0.00757928	TLR4/IL6/CSF2/CD74/TLR2/WNT5A/ZC3H12A/ITGAM/LRFN5/PLA2G4A/THBS1/IL31RA/TLR6/SYT11/SNCA	15
BP	GO:0071887	leukocyte apoptotic process	15/1079	102/18862	0.00067435	0.00986146	0.00757928	IL6/CD74/WNT5A/CXCL12/ADAM8/TNFRSF21/EFNA1/PIK3CD/FADD/LGALS3/MERTK/IL7R/ARG2/IRF3/IRF7	15
BP	GO:0098869	cellular oxidant detoxification	15/1079	102/18862	0.00067435	0.00986146	0.00757928	PTGS1/PTGES/ALOX5AP/GPX3/SOD2/CLIC2/APOE/NQO1/PRDX5/TXNDC17/PTGS2/PRXL2A/MGST3/PARK7/PRXL2B	15
BP	GO:0050769	positive regulation of neurogenesis	25/1079	217/18862	0.000683413	0.00996721	0.00766056	IL1B/IL6/RASSF10/ISLR2/TLR2/CXCL12/SEMA7A/PLAG1/CRABP2/LPAR3/MAP6/NRP1/BIN1/METRN/LIF/SERPINE2/TWF2/PRMT5/PAK3/FOXG1/SPINT1/NIN/HES1/RGS14/NKX6-1	25
BP	GO:0050671	positive regulation of lymphocyte proliferation	18/1079	135/18862	0.000690191	0.0100391	0.00771584	TLR4/IL1B/IL6/IL18/CD74/IL1A/PTPN22/CCDC88B/ICOSLG/EBI3/ZP3/NFATC2/TGFBR2/FADD/IL7/HLA-A/HES1/IL15	18
BP	GO:0045185	maintenance of protein location	14/1079	92/18862	0.000711607	0.0102956	0.00791294	TMSB4Y/GRIK5/CHCHD10/NRROS/NFKBIA/INSIG1/ANK3/NBL1/PINK1/LTBP1/TWF2/PML/NFKBIE/PARK7	14
BP	GO:1901216	positive regulation of neuron death	14/1079	92/18862	0.000711607	0.0102956	0.00791294	TLR4/WNT5A/GRIK5/ITGAM/ADORA1/ITGA1/TLR6/MAP3K5/NQO1/SNCA/PAK3/CASP8/BAD/EIF2S1	14
BP	GO:0002819	regulation of adaptive immune response	21/1079	170/18862	0.000724664	0.0104567	0.00803676	IL18R1/C3/IL1B/IL6/IL18/SAMSN1/ZC3H12A/GATA3/PLA2G4A/ZP3/TNFAIP3/LOXL3/IL1R1/FADD/IL7R/DUSP10/SMAD7/HLA-A/NFKBIZ/HLX/IRF7	21
BP	GO:0051604	protein maturation	31/1079	293/18862	0.000730261	0.0104642	0.00804256	SCG5/PRSS3/SERPINF2/CARD16/GGT1/PLAU/CTSS/MMP14/CPE/THBS1/ADAM8/MAGEA3/PCSK1N/FADD/PSENEN/PLAT/ISCA2/TMEM208/PLGRKT/TBC1D10A/CASP1/SERPINE2/FKBP1A/MYRF/CASP8/APH1B/BAD/ADAMTS3/PHEX/HTRA2/ERO1A	31
BP	GO:0046427	positive regulation of receptor signaling pathway via JAK-STAT	9/1079	44/18862	0.00073195	0.0104642	0.00804256	OCIAD2/IL6/PTK2B/AKR1B1/SOCS1/PRLR/CYP1B1/F2R/HES1	9
BP	GO:0002753	cytoplasmic pattern recognition receptor signaling pathway	12/1079	72/18862	0.000734703	0.0104642	0.00804256	INAVA/TLR4/SLC15A3/PTPN22/NFKBIA/IRAK2/TNFAIP3/TSPAN6/CASP8/LACC1/IRF3/IRF7	12
BP	GO:0033627	cell adhesion mediated by integrin	12/1079	72/18862	0.000734703	0.0104642	0.00804256	DPP4/COL16A1/PLAU/ITGA11/PLPP3/LPXN/ITGA2/EFNA1/ITGB8/LIF/CYP1B1/ITGB5	12
BP	GO:0002695	negative regulation of leukocyte activation	22/1079	182/18862	0.000736729	0.0104642	0.00804256	INHBA/CD74/SAMSN1/ZC3H12A/LRFN5/SOCS1/SPN/PTPN22/IL31RA/TNFRSF21/CEBPB/TNFAIP3/MILR1/LOXL3/SFRP1/LGALS3/MERTK/LAPTM5/SYT11/ARG2/SMAD7/HLX	22
BP	GO:0043123	positive regulation of I-kappaB kinase/NF-kappaB signaling	22/1079	182/18862	0.000736729	0.0104642	0.00804256	F2RL1/INAVA/TLR4/CARD16/CD74/S100A4/TGM2/APOL3/IKBKE/TLR6/FADD/PINK1/CASP1/FKBP1A/AJUBA/TSPAN6/F2R/MIB2/CASP8/SLC20A1/IRF3/TRIM6	22
BP	GO:2000146	negative regulation of cell motility	35/1079	345/18862	0.000742519	0.010519	0.00808467	DPP4/GREM1/TIE1/CD74/IL24/KRT16/CLDN3/STC1/CXCL12/GATA3/TIMP1/THBS1/PTPRR/ADORA1/PTPRU/CCL2/APOE/TRIB1/SPINT2/NOG/VASH1/SFRP1/PTGER4/DUSP10/NBL1/FGF2/JUP/RHOB/RRAS/CYP1B1/ADAM15/PTPRK/SMAD7/APEX1/HYAL2	35
BP	GO:0002062	chondrocyte differentiation	15/1079	103/18862	0.000748398	0.0105201	0.00808551	CYTL1/GREM1/PTHLH/SOX5/HMGA2/SLC39A14/NKX3-2/TGFBR2/ADAMTS12/CHST11/SOX9/RUNX2/LTBP3/SMAD7/ANXA6	15
BP	GO:0030593	neutrophil chemotaxis	15/1079	103/18862	0.000748398	0.0105201	0.00808551	CXCL5/DPP4/CXCL6/CXCL8/CXCL1/CXCL2/CD74/CXCL3/CCL7/CCL2/ITGA1/PIK3CD/LGALS3/PDE4B/SRP54	15
BP	GO:0032637	interleukin-8 production	15/1079	103/18862	0.000748398	0.0105201	0.00808551	F2RL1/TLR4/IL1B/IL6/CD74/TLR2/WNT5A/PTPN22/CD14/TLR6/FADD/F2R/CD58/PARK7/HYAL2	15
BP	GO:0032946	positive regulation of mononuclear cell proliferation	18/1079	136/18862	0.000753891	0.01057	0.00812386	TLR4/IL1B/IL6/IL18/CD74/IL1A/PTPN22/CCDC88B/ICOSLG/EBI3/ZP3/NFATC2/TGFBR2/FADD/IL7/HLA-A/HES1/IL15	18
BP	GO:0071453	cellular response to oxygen levels	26/1079	231/18862	0.000766924	0.0107251	0.00824306	CARD16/STC1/PSMB9/PSME2/PSMB5/AQP3/ADAM8/PLK3/PSME1/PSMB10/NDRG1/PSMB8/PSMC6/SFRP1/PSMA6/NKX3-1/PINK1/PTGS2/PMAIP1/CPEB2/AJUBA/PSMA7/PSMA1/BAD/KCNK2/ERO1A	26
BP	GO:0050867	positive regulation of cell activation	40/1079	412/18862	0.000773372	0.0107875	0.00829104	F2RL1/DPP4/KLRC2/TLR4/IL1B/IL6/IL18/VNN1/CD74/IL1A/WNT5A/ITGAM/GATA3/PLA2G4A/MMP14/SOCS1/PTPN22/THBS1/CCDC88B/ICOSLG/EBI3/CCL2/ZP3/PPP2R3C/ADAM8/NFATC2/TLR6/TGFBR2/FADD/IL7/SH3KBP1/IL7R/DUSP10/PAK3/BAD/HLA-A/NFKBIZ/HES1/HLX/IL15	40
BP	GO:0042493	response to drug	36/1079	359/18862	0.0007771	0.0108118	0.00830971	IL1B/INHBA/PTK2B/GIP/ABCC3/HMGA2/GATA3/DUSP6/ASS1/CYP2J2/CYP2S1/ITGA2/SOD2/THBS1/TNFRSF11B/CYP2R1/NFATC2/DAD1/QDPR/SLC22A3/TGFBR2/NQO1/SFRP1/NKX3-1/PDE4B/ENO3/GGH/HMGCS1/NPAS2/GCLM/VEGFB/XRCC1/BAD/TP53I13/APEX1/NKX6-1	36
BP	GO:0001780	neutrophil homeostasis	5/1079	14/18862	0.000786812	0.0108636	0.0083495	IL6/PIK3CD/MERTK/SH2B3/PDE4B	5
BP	GO:0010935	regulation of macrophage cytokine production	5/1079	14/18862	0.000786812	0.0108636	0.0083495	TLR4/CD74/WNT5A/SEMA7A/LAPTM5	5
BP	GO:0050930	induction of positive chemotaxis	5/1079	14/18862	0.000786812	0.0108636	0.0083495	CXCL8/CXCL12/PGF/ARTN/VEGFB	5
BP	GO:0014013	regulation of gliogenesis	14/1079	93/18862	0.000794479	0.0109369	0.00840586	IL1B/IL6/GPR37L1/TLR2/PLAG1/NOG/DUSP10/BIN1/LIF/SERPINE2/PRMT5/SPINT1/HES1/NKX6-1	14
BP	GO:0070665	positive regulation of leukocyte proliferation	19/1079	148/18862	0.000796144	0.0109369	0.00840586	TLR4/IL1B/IL6/IL18/CD74/CSF1R/IL1A/PTPN22/CCDC88B/ICOSLG/EBI3/ZP3/NFATC2/TGFBR2/FADD/IL7/HLA-A/HES1/IL15	19
BP	GO:0002369	T cell cytokine production	8/1079	36/18862	0.000804427	0.0109809	0.00843968	IL18R1/IL1B/IL6/IL18/GATA3/IL1R1/SMAD7/HLA-A	8
BP	GO:0061037	negative regulation of cartilage development	7/1079	28/18862	0.000805403	0.0109809	0.00843968	GREM1/PTHLH/NKX3-2/NOG/ADAMTS12/SOX9/LTBP3	7
BP	GO:1902547	regulation of cellular response to vascular endothelial growth factor stimulus	7/1079	28/18862	0.000805403	0.0109809	0.00843968	XDH/SEMA6A/ADAMTS12/SPRY2/JCAD/ADAMTS3/CD63	7
BP	GO:0014015	positive regulation of gliogenesis	11/1079	63/18862	0.000809229	0.0110055	0.00845857	IL1B/IL6/TLR2/PLAG1/BIN1/LIF/SERPINE2/PRMT5/SPINT1/HES1/NKX6-1	11
BP	GO:0048660	regulation of smooth muscle cell proliferation	20/1079	160/18862	0.000825953	0.011205	0.00861186	SERPINF2/IL6/IL18/MMP9/AKR1B1/NDRG2/TGM2/P2RY6/ITGA2/SOD2/THBS1/TRIB1/MMP2/TNFAIP3/MAP3K5/TGFBR2/PTGIR/FGF2/IL15/ERN1	20
BP	GO:0002292	T cell differentiation involved in immune response	12/1079	73/18862	0.000834285	0.0112618	0.00865555	IL18R1/IL6/IL18/ZC3H12A/GATA3/SPN/LOXL3/PTGER4/RELB/SMAD7/NFKBIZ/HLX	12
BP	GO:0006809	nitric oxide biosynthetic process	12/1079	73/18862	0.000834285	0.0112618	0.00865555	TLR4/IL1B/PTK2B/PTX3/ZC3H12A/ASS1/TLR6/NQO1/ARG2/PTGS2/CYP1B1/P2RX4	12
BP	GO:0032612	interleukin-1 production	17/1079	126/18862	0.000839214	0.0113003	0.00868514	F2RL1/INAVA/TLR4/CARD16/IL6/WNT5A/ZC3H12A/TNFAIP3/TLR6/TRIM16/GBP5/ARG2/CASP1/PML/F2R/CASP8/NLRP1	17
BP	GO:0043393	regulation of protein binding	23/1079	196/18862	0.000854071	0.011472	0.00881707	CSF3/CARD16/MMP9/MAP2/WNT5A/CTHRC1/APOE/NRP1/IFIT2/NES/NFATC4/ID1/NOG/PHLDA2/ADRB2/NKX3-1/FKBP1A/IFIT1/DACT1/ADAM15/DNAJB2/PARK7/TGFBR3	23
BP	GO:0043687	post-translational protein modification	36/1079	361/18862	0.000859305	0.0115138	0.00884926	C3/IL6/FBXO2/ASB9/PSMB9/NEDD8/AFP/TIMP1/TMEM132A/PSME2/PSMB5/APOE/RAB13/LRR1/PSME1/PSMB10/APOL1/VGF/FBXO27/PSMB8/IGFBP4/PSMC6/PSMA6/ASB13/RAB3A/MXRA8/SPSB2/LTBP1/RABGGTA/LAMB1/FAM20C/IGFBP7/DCAF11/FBXO44/PSMA7/PSMA1	36
BP	GO:0002790	peptide secretion	39/1079	401/18862	0.000865153	0.0115637	0.0088876	F2RL1/DPP4/TLR4/IL1B/IL6/SNAP25/GPR68/GIP/CD74/PAX8/IL1A/TLR2/RAPGEF3/PTPRN/STEAP3/SNCG/ADORA1/IRS1/APOE/STX1A/ADAM8/RAB13/KCNN4/KCNS3/VGF/LTBP2/MIA2/ARF6/SFRP1/RAB3A/ATP13A2/CYP51A1/F2R/UQCC2/MPC2/BAD/PARK7/ERP29/NKX6-1	39
BP	GO:0097305	response to alcohol	26/1079	233/18862	0.000871907	0.0116254	0.00893502	AKR1C3/CSF3/INHBA/PTK2B/GNG2/CLDN3/PTGER2/CCL7/GATA3/SOD2/CD14/ATP2B1/TGFBR2/NQO1/SFRP1/PTGER4/GGH/CLDN1/PMVK/JUP/IGFBP7/HMGCS1/CASP8/ADAM15/BAD/TGFBR3	26
BP	GO:0001933	negative regulation of protein phosphorylation	36/1079	362/18862	0.000903205	0.0120133	0.00923312	TRIB2/IL1B/GREM1/DUSP4/PMEPA1/SAMSN1/PLPP3/PDE4D/ZC3H12A/XDH/DUSP6/SOCS1/PTPN22/APOE/TRIB1/DUSP5/TNFAIP3/GPS2/NOG/SPRY4/SFRP1/SPRY2/PKIA/SH2B3/DUSP10/SNX6/SNCA/RTRAF/DMD/MVP/SMAD7/RGS14/RASSF2/PID1/PARK7/HYAL2	36
BP	GO:0032970	regulation of actin filament-based process	38/1079	389/18862	0.000922799	0.012244	0.00941041	CSF3/F2RL1/TENM1/SERPINF2/HCN4/TRPM2/PTK2B/CSF1R/TMSB4Y/SH3BP1/STC1/PDE4D/CXCL12/RAPGEF3/NOX4/RHOF/ADORA1/SPTB/NRP1/ID1/FMN1/FHOD3/ARF6/SFRP1/PDE4B/CFL2/PTGER4/ARPC4/RANGRF/CAPG/BIN1/JUP/TWF2/RHOB/PAK3/F11R/ARHGAP18/CDC42EP4	38
BP	GO:0003281	ventricular septum development	11/1079	64/18862	0.000927536	0.0122769	0.00943571	STRA6/WNT5A/GATA3/TBX3/NOG/TGFBR2/SMAD7/HECTD1/HES1/SAV1/TGFBR3	11
BP	GO:1902036	regulation of hematopoietic stem cell differentiation	12/1079	74/18862	0.000944875	0.012476	0.00958877	OCIAD2/GATA3/PSMB9/PSME2/PSMB5/PSME1/PSMB10/PSMB8/PSMC6/PSMA6/PSMA7/PSMA1	12
BP	GO:0010959	regulation of metal ion transport	27/1079	247/18862	0.000959161	0.012634	0.00971018	EHD3/PTK2B/JPH4/STC1/PDE4D/P2RY6/CXCL12/RRAD/CLIC2/LPAR3/PLPP4/CCL2/ATP2B1/CAMK2A/LGALS3/PDE4B/BIN1/BEST1/FKBP1A/SNCA/DMD/PML/F2R/SARAF/RGS9/PACSIN3/P2RX4	27
BP	GO:0048659	smooth muscle cell proliferation	20/1079	162/18862	0.000965981	0.0126931	0.0097556	SERPINF2/IL6/IL18/MMP9/AKR1B1/NDRG2/TGM2/P2RY6/ITGA2/SOD2/THBS1/TRIB1/MMP2/TNFAIP3/MAP3K5/TGFBR2/PTGIR/FGF2/IL15/ERN1	20
BP	GO:0060412	ventricular septum morphogenesis	8/1079	37/18862	0.000975532	0.0127264	0.00978118	WNT5A/TBX3/NOG/TGFBR2/SMAD7/HES1/SAV1/TGFBR3	8
BP	GO:1903115	regulation of actin filament-based movement	8/1079	37/18862	0.000975532	0.0127264	0.00978118	HCN4/STC1/PDE4D/ADORA1/PDE4B/RANGRF/BIN1/JUP	8
BP	GO:2000403	positive regulation of lymphocyte migration	8/1079	37/18862	0.000975532	0.0127264	0.00978118	PTK2B/WNT5A/CXCL12/CCL7/SPN/ADAM8/FADD/TMEM102	8
BP	GO:1901136	carbohydrate derivative catabolic process	23/1079	198/18862	0.000981665	0.0127757	0.00981912	LUM/AOAH/CHI3L2/FBXO2/PDE4D/CDA/XDH/NT5E/APOBEC3G/FBXO27/MAN1A1/ADAMTS12/NTHL1/PDE4B/APOBEC3F/FGF2/AMPD3/HINT1/FBXO44/SDC3/NUDT11/HYAL2/IDS	23
BP	GO:0032091	negative regulation of protein binding	14/1079	96/18862	0.00109353	0.0141638	0.010886	CARD16/MAP2/IFIT2/NES/NFATC4/ID1/NOG/ADRB2/NKX3-1/IFIT1/DACT1/ADAM15/DNAJB2/PARK7	14
BP	GO:0048661	positive regulation of smooth muscle cell proliferation	14/1079	96/18862	0.00109353	0.0141638	0.010886	SERPINF2/IL6/IL18/MMP9/AKR1B1/TGM2/P2RY6/ITGA2/THBS1/MMP2/MAP3K5/TGFBR2/FGF2/ERN1	14
BP	GO:0046632	alpha-beta T cell differentiation	15/1079	107/18862	0.00111747	0.0143778	0.0110504	IL18R1/IL6/IL18/PRDM1/ZC3H12A/GATA3/SOCS1/SPN/LOXL3/TGFBR2/PTGER4/RELB/SMAD7/NFKBIZ/HLX	15
BP	GO:0002070	epithelial cell maturation	5/1079	15/18862	0.00112493	0.0143778	0.0110504	AKR1B1/HOXA5/HOXB13/FOXA1/NKX6-1	5
BP	GO:0002827	positive regulation of T-helper 1 type immune response	5/1079	15/18862	0.00112493	0.0143778	0.0110504	IL18R1/IL1B/IL18/PLA2G4A/IL1R1	5
BP	GO:0010934	macrophage cytokine production	5/1079	15/18862	0.00112493	0.0143778	0.0110504	TLR4/CD74/WNT5A/SEMA7A/LAPTM5	5
BP	GO:0051770	positive regulation of nitric-oxide synthase biosynthetic process	5/1079	15/18862	0.00112493	0.0143778	0.0110504	TLR4/TLR2/CCL2/KDR/NAMPT	5
BP	GO:1903034	regulation of response to wounding	20/1079	164/18862	0.00112591	0.0143778	0.0110504	F2RL1/SERPINF2/SERPINB2/PLAU/CLDN3/PLPP3/C1QTNF1/THBS1/SCARF1/APOE/VKORC1/TNFAIP3/PLAT/SH2B3/FAP/CLDN1/FGF2/SERPINE2/F2R/USF1	20
BP	GO:0042326	negative regulation of phosphorylation	39/1079	407/18862	0.00114275	0.0145587	0.0111895	TRIB2/IL1B/INHBA/GREM1/DUSP4/PMEPA1/SAMSN1/PLPP3/PDE4D/ZC3H12A/XDH/DUSP6/SOCS1/PTPN22/APOE/TRIB1/DUSP5/TNFAIP3/GPS2/NOG/SPRY4/SFRP1/SPRY2/PKIA/SH2B3/DUSP10/SNX6/SNCA/RTRAF/DMD/AJUBA/MVP/SMAD7/RGS14/RASSF2/PPIF/PID1/PARK7/HYAL2	39
BP	GO:0009306	protein secretion	36/1079	367/18862	0.00115358	0.0146623	0.0112691	F2RL1/DPP4/TLR4/IL1B/IL6/SNAP25/GPR68/GIP/IL1A/TLR2/RAPGEF3/PTPRN/STEAP3/SNCG/IRS1/APOE/STX1A/ADAM8/RAB13/KCNN4/KCNS3/VGF/LTBP2/MIA2/ARF6/SFRP1/RAB3A/ATP13A2/CYP51A1/F2R/UQCC2/MPC2/BAD/PARK7/ERP29/NKX6-1	36
BP	GO:0032102	negative regulation of response to external stimulus	38/1079	394/18862	0.00116723	0.0147907	0.0113678	AOAH/DPP4/SERPINF2/SERPINB2/GREM1/CARD16/PLAU/CLDN3/C1QTNF1/WNT5A/SEMA7A/GATA3/LRFN5/NT5E/THBS1/ADORA1/CCL2/APOE/TRIB1/NRP1/TNFAIP3/GPS2/SEMA6A/PLAT/SH2B3/FAP/PTGER4/SYT11/DUSP10/ARG2/NBL1/FGF2/SERPINE2/TSPAN6/SIGIRR/PSMA1/HLA-A/USF1	38
BP	GO:0051962	positive regulation of nervous system development	28/1079	263/18862	0.00117147	0.0147907	0.0113678	IL1B/IL6/NRXN1/RASSF10/ISLR2/TLR2/CXCL12/SEMA7A/AMIGO2/PLAG1/CRABP2/SRPX2/LPAR3/MAP6/NRP1/BIN1/METRN/LIF/SERPINE2/TWF2/PRMT5/PAK3/FOXG1/SPINT1/NIN/HES1/RGS14/NKX6-1	28
BP	GO:0045429	positive regulation of nitric oxide biosynthetic process	8/1079	38/18862	0.00117456	0.0147907	0.0113678	TLR4/IL1B/PTK2B/PTX3/ASS1/TLR6/PTGS2/P2RX4	8
BP	GO:0071398	cellular response to fatty acid	8/1079	38/18862	0.00117456	0.0147907	0.0113678	AKR1C3/ZC3H12A/ASS1/DGAT2/IRS1/NFATC4/CLDN1/PID1	8
BP	GO:0048705	skeletal system morphogenesis	24/1079	213/18862	0.00118179	0.0148474	0.0114113	TMEM119/GREM1/CYP26B1/STC1/SOX5/MMP14/CSGALNACT1/HOXA5/LHX1/MMP2/NKX3-2/NOG/PRRX1/FMN1/INSIG1/TGFBR2/SFRP1/CHST11/SOX9/HHIP/LTBP3/CSRNP1/ANXA6/HYAL2	24
BP	GO:0097028	dendritic cell differentiation	9/1079	47/18862	0.0012062	0.0151192	0.0116203	F2RL1/DHRS2/TRPM2/CSF2/BATF3/CEBPB/TGFBR2/ITGB8/RELB	9
BP	GO:0035592	establishment of protein localization to extracellular region	36/1079	368/18862	0.00121037	0.0151366	0.0116336	F2RL1/DPP4/TLR4/IL1B/IL6/SNAP25/GPR68/GIP/IL1A/TLR2/RAPGEF3/PTPRN/STEAP3/SNCG/IRS1/APOE/STX1A/ADAM8/RAB13/KCNN4/KCNS3/VGF/LTBP2/MIA2/ARF6/SFRP1/RAB3A/ATP13A2/CYP51A1/F2R/UQCC2/MPC2/BAD/PARK7/ERP29/NKX6-1	36
BP	GO:0071346	cellular response to interferon-gamma	21/1079	177/18862	0.00122188	0.0152455	0.0117173	OASL/TLR4/TLR2/OAS2/WNT5A/CCL7/ASS1/SOCS1/CCL2/CAMK2A/GBP5/CLDN1/CASP1/PML/GBP2/IRF3/HLA-A/SLC26A6/CD58/CDC42EP4/IRF7	21
BP	GO:0090183	regulation of kidney development	7/1079	30/18862	0.00125287	0.0155537	0.0119542	GREM1/PAX8/GATA3/LHX1/GDNF/NOG/SOX9	7
BP	GO:0008202	steroid metabolic process	33/1079	329/18862	0.00125469	0.0155537	0.0119542	AKR1C3/DHRS2/CYP11A1/UGT2B7/APOC1/AKR1B1/VDR/CYP26B1/DGAT2/PRLR/SCARF1/APOE/CYP2R1/FGFR4/NPC2/APOL1/INSIG1/DHRS4/TSPOAP1/CYP51A1/PMVK/SQLE/IGFBP7/MSMO1/EBPL/HMGCS1/IDI1/CYP1B1/CLN8/PIP4P1/ACAA1/HSD17B7/SNAI1	33
BP	GO:0007411	axon guidance	29/1079	277/18862	0.00125516	0.0155537	0.0119542	NRCAM/NRXN1/GAP43/CSF1R/LAMC2/WNT5A/CXCL12/SEMA7A/GATA3/ROBO4/ROBO3/ARTN/NRP2/SPTB/LHX1/NRP1/GDNF/NOG/SEMA6A/EFNA1/FEZ1/PIK3CD/SH3KBP1/DPYSL5/TUBB2B/LAMA5/FOXG1/LAMA1/DOK1	29
BP	GO:0007179	transforming growth factor beta receptor signaling pathway	23/1079	202/18862	0.00128689	0.0159106	0.0122285	PMEPA1/HTRA3/DUSP15/LPXN/NRROS/THBS1/ID1/LTBP2/TGFBR2/CHST11/ITGB8/SPRY2/LTBP1/SNX6/PML/LTBP3/PTPRK/ITGB5/SMAD7/LEMD3/F11R/FUT8/TGFBR3	23
BP	GO:0006919	activation of cysteine-type endopeptidase activity involved in apoptotic process	13/1079	87/18862	0.00129406	0.015963	0.0122688	TNFSF15/XDH/HSPE1/FADD/LAPTM5/NKX3-1/SNCA/PMAIP1/PML/F2R/CASP8/BAD/NLRP1	13
BP	GO:0022900	electron transport chain	21/1079	178/18862	0.00131255	0.0161545	0.012416	AKR1B1/XDH/NOX4/ALDH2/COX6A1/QDPR/P4HA2/UQCC3/COX8A/NDUFB2/PINK1/NDUFA1/SNCA/SDHAF2/NDUFA12/UQCR10/ISCU/CYBA/UQCRC1/PARK7/AKR1A1	21
BP	GO:0030336	negative regulation of cell migration	33/1079	330/18862	0.00131981	0.0162071	0.0124564	DPP4/GREM1/TIE1/CD74/IL24/KRT16/CLDN3/STC1/CXCL12/TIMP1/THBS1/PTPRR/ADORA1/PTPRU/CCL2/APOE/TRIB1/NOG/VASH1/SFRP1/PTGER4/DUSP10/NBL1/FGF2/JUP/RHOB/RRAS/CYP1B1/ADAM15/PTPRK/SMAD7/APEX1/HYAL2	33
BP	GO:0097485	neuron projection guidance	29/1079	278/18862	0.00132693	0.0162579	0.0124954	NRCAM/NRXN1/GAP43/CSF1R/LAMC2/WNT5A/CXCL12/SEMA7A/GATA3/ROBO4/ROBO3/ARTN/NRP2/SPTB/LHX1/NRP1/GDNF/NOG/SEMA6A/EFNA1/FEZ1/PIK3CD/SH3KBP1/DPYSL5/TUBB2B/LAMA5/FOXG1/LAMA1/DOK1	29
BP	GO:0007568	aging	31/1079	304/18862	0.00133387	0.0163062	0.0125325	KYNU/WNT16/MMP7/KRT16/BCL2A1/HMGA2/ASS1/NOX4/TIMP1/TBX3/SOD2/ROMO1/HMGA1/ATP2B1/VASH1/TGFBR2/NQO1/ENO3/CLDN1/ARG2/FOXG1/PML/GCLM/CLN8/APEX1/IL15/ZNF354A/HTRA2/ERO1A/HYAL2/EIF2S1	31
BP	GO:0032963	collagen metabolic process	15/1079	109/18862	0.00135317	0.016505	0.0126854	COL15A1/SERPINF2/IL6/SERPINB7/MMP7/MMP9/CTSS/MMP14/ITGA2/MMP2/MMP17/FAP/F2R/ADAM15/ADAMTS3	15
BP	GO:0006720	isoprenoid metabolic process	18/1079	143/18862	0.00135751	0.0165209	0.0126976	AKR1C3/RARRES2/STRA6/AKR1B1/CYP26B1/PLB1/CRABP2/DGAT2/CYP2S1/APOE/NPC2/RDH11/PMVK/HMGCS1/IDI1/CYP1B1/SDC3/HTRA2	18
BP	GO:0072078	nephron tubule morphogenesis	11/1079	67/18862	0.00137107	0.0166487	0.0127958	GREM1/PAX8/GATA3/LHX1/GDNF/NOG/FMN1/SOX9/FGF2/LAMA5/HES1	11
BP	GO:0051091	positive regulation of DNA-binding transcription factor activity	28/1079	266/18862	0.00139061	0.0168261	0.0129321	CSF3/IL18R1/CYTL1/TLR4/IL1B/GREM1/CARD16/IL6/IL18/TLR2/PLPP3/WNT5A/ADAM8/IRAK2/TLR6/CAMK2A/PSMA6/NKX3-1/FOXA1/PINK1/JUP/DDRGK1/TRIM6/SAV1/PARK7/ANXA3/RNF25/NKX6-1	28
BP	GO:0001935	endothelial cell proliferation	22/1079	191/18862	0.00139707	0.0168261	0.0129321	FLT1/TIE1/WNT5A/CXCL12/XDH/BMPER/MMP14/PGF/NRP2/THBS1/CCL2/APOE/NRP1/EMC10/KDR/TNFSF12/VASH1/PIK3CD/JCAD/FGF2/VEGFB/ERN1	22
BP	GO:0072210	metanephric nephron development	8/1079	39/18862	0.00140464	0.0168261	0.0129321	GREM1/PAX8/LHX1/GDNF/FMN1/SOX9/LIF/HES1	8
BP	GO:1904407	positive regulation of nitric oxide metabolic process	8/1079	39/18862	0.00140464	0.0168261	0.0129321	TLR4/IL1B/PTK2B/PTX3/ASS1/TLR6/PTGS2/P2RX4	8
BP	GO:0007369	gastrulation	21/1079	179/18862	0.00140892	0.0168261	0.0129321	INHBA/SOX7/DUSP4/MMP9/WNT5A/HMGA2/LAMB3/MMP14/COL7A1/ITGA2/TLX2/LHX1/MMP2/ITGA7/DUSP5/NOG/TGFBR2/SFRP1/LAMB1/ITGB5/SNAI1	21
BP	GO:0002673	regulation of acute inflammatory response	9/1079	48/18862	0.00141042	0.0168261	0.0129321	C3/PTGES/IL1B/IL6/ADORA1/ZP3/ADAM8/PTGS2/PARK7	9
BP	GO:0006692	prostanoid metabolic process	9/1079	48/18862	0.00141042	0.0168261	0.0129321	AKR1C3/PTGS1/PTGES/IL1B/CD74/PLA2G4A/CYP2S1/PTGS2/PRXL2B	9
BP	GO:0006693	prostaglandin metabolic process	9/1079	48/18862	0.00141042	0.0168261	0.0129321	AKR1C3/PTGS1/PTGES/IL1B/CD74/PLA2G4A/CYP2S1/PTGS2/PRXL2B	9
BP	GO:0070663	regulation of leukocyte proliferation	26/1079	241/18862	0.00142672	0.0169832	0.0130529	TLR4/IL1B/GREM1/IL6/IL18/CD74/CSF1R/IL1A/SPN/PTPN22/CCDC88B/ICOSLG/EBI3/ZP3/TNFRSF21/CEBPB/NFATC2/TNFAIP3/TGFBR2/FADD/LGALS3/IL7/ARG2/HLA-A/HES1/IL15	26
BP	GO:0045582	positive regulation of T cell differentiation	13/1079	88/18862	0.00144052	0.0170357	0.0130932	IL18/VNN1/CD74/GATA3/SOCS1/ADAM8/TGFBR2/IL7/IL7R/DUSP10/BAD/NFKBIZ/HLX	13
BP	GO:0060993	kidney morphogenesis	13/1079	88/18862	0.00144052	0.0170357	0.0130932	GREM1/PAX8/GATA3/LHX1/GDNF/NOG/FMN1/SOX9/WNT7B/FGF2/LAMA5/LIF/HES1	13
BP	GO:0072080	nephron tubule development	13/1079	88/18862	0.00144052	0.0170357	0.0130932	GREM1/PAX8/GATA3/LHX1/GDNF/NOG/FMN1/SOX9/WNT7B/FGF2/LAMA5/LIF/HES1	13
BP	GO:0002474	antigen processing and presentation of peptide antigen via MHC class I	14/1079	99/18862	0.00148178	0.0174101	0.013381	PSMB9/PSME2/PSMB5/PSME1/PSMB10/PSMB8/PSMC6/SEC23A/PSMA6/PSMA7/CYBA/ITGB5/PSMA1/HLA-A	14
BP	GO:0042102	positive regulation of T cell proliferation	14/1079	99/18862	0.00148178	0.0174101	0.013381	IL1B/IL6/IL18/IL1A/PTPN22/CCDC88B/ICOSLG/EBI3/ZP3/TGFBR2/FADD/HLA-A/HES1/IL15	14
BP	GO:1903426	regulation of reactive oxygen species biosynthetic process	14/1079	99/18862	0.00148178	0.0174101	0.013381	TLR4/IL1B/PTK2B/PTX3/ZC3H12A/ASS1/SOD2/TLR6/ARG2/PTGS2/SNCA/CYBA/P2RX4/PARK7	14
BP	GO:0031639	plasminogen activation	6/1079	23/18862	0.00150335	0.0175498	0.0134884	SERPINF2/PLAU/THBS1/PLAT/PLGRKT/SERPINE2	6
BP	GO:0032331	negative regulation of chondrocyte differentiation	6/1079	23/18862	0.00150335	0.0175498	0.0134884	GREM1/PTHLH/NKX3-2/ADAMTS12/SOX9/LTBP3	6
BP	GO:0051043	regulation of membrane protein ectodomain proteolysis	6/1079	23/18862	0.00150335	0.0175498	0.0134884	IL1B/TIMP3/TIMP1/APOE/ADAM8/PACSIN3	6
BP	GO:0060317	cardiac epithelial to mesenchymal transition	7/1079	31/18862	0.0015394	0.0179322	0.0137823	WNT16/NOG/EFNA1/TGFBR2/ADAM15/SNAI1/TGFBR3	7
BP	GO:0051937	catecholamine transport	11/1079	68/18862	0.00155274	0.0180146	0.0138456	CXCL12/SNCG/STX1A/GDNF/SLC22A3/RAB3A/SYT1/SYT11/PINK1/SNCA/PARK7	11
BP	GO:0030540	female genitalia development	5/1079	16/18862	0.00155972	0.0180146	0.0138456	STRA6/WNT5A/TBX3/LHX1/MERTK	5
BP	GO:0031649	heat generation	5/1079	16/18862	0.00155972	0.0180146	0.0138456	PTGES/IL1B/IL1A/ADRB2/PTGS2	5
BP	GO:0061081	positive regulation of myeloid leukocyte cytokine production involved in immune response	5/1079	16/18862	0.00155972	0.0180146	0.0138456	TLR4/CD74/WNT5A/SEMA7A/LAPTM5	5
BP	GO:0038127	ERBB signaling pathway	18/1079	145/18862	0.00159138	0.018291	0.014058	PTK2B/FAM83A/SH3TC2/MMP9/BTC/IFI6/PTPRR/ADORA1/ITGA1/REPS2/SPRY2/SOX9/SH3KBP1/SNX6/DOK1/MVP/NRG1/RASSF2	18
BP	GO:0050731	positive regulation of peptidyl-tyrosine phosphorylation	22/1079	193/18862	0.00159847	0.018291	0.014058	CSF3/PECAM1/GREM1/IL6/CSF2/PTK2B/IL18/CD74/ENPP2/CSF1R/IL24/BTC/IL11/NOX4/ADORA1/IL31RA/NRP1/EFNA1/LIF/HES1/NRG1/IL15	22
BP	GO:0033273	response to vitamin	13/1079	89/18862	0.00160047	0.018291	0.014058	KYNU/VDR/CYP26B1/STC1/ITGA2/SOD2/AQP3/ATP2B1/SFRP1/HMGCS1/IL15/PHEX/ZNF354A	13
BP	GO:0048525	negative regulation of viral process	13/1079	89/18862	0.00160047	0.018291	0.014058	OASL/ISG20/PTX3/OAS2/HMGA2/TNIP1/APOBEC3G/PARP10/APOBEC3F/ISG15/IFIT1/PML/TRIM6	13
BP	GO:1901532	regulation of hematopoietic progenitor cell differentiation	13/1079	89/18862	0.00160047	0.018291	0.014058	OCIAD2/GATA3/PSMB9/PSME2/PSMB5/PSME1/PSMB10/PSMB8/PSMC6/PSMA6/PSMA7/PSMA1/HES1	13
BP	GO:0071675	regulation of mononuclear cell migration	15/1079	111/18862	0.00162924	0.0185808	0.0142808	RARRES2/GREM1/PTK2B/CSF1R/WNT5A/CXCL12/CCL7/SPN/THBS1/CCL2/ADAM8/FADD/LGALS3/NBL1/TMEM102	15
BP	GO:0010717	regulation of epithelial to mesenchymal transition	14/1079	100/18862	0.00163431	0.0185997	0.0142953	IL1B/GREM1/IL6/GATA3/NOG/EFNA1/TGFBR2/SFRP1/SPRY2/FOXA1/DACT3/SDHAF2/SMAD7/SNAI1	14
BP	GO:0050767	regulation of neurogenesis	34/1079	348/18862	0.00166619	0.0188318	0.0144737	IL1B/IL6/RASSF10/ISLR2/GPR37L1/TLR2/MAP2/WNT5A/CXCL12/SEMA7A/PLAG1/CRABP2/TLX2/LPAR3/MAP6/NRP1/NFATC4/ID1/NOG/SEMA6A/DUSP10/BIN1/METRN/LIF/SERPINE2/TWF2/PRMT5/PAK3/FOXG1/SPINT1/NIN/HES1/RGS14/NKX6-1	34
BP	GO:0014047	glutamate secretion	8/1079	40/18862	0.0016691	0.0188318	0.0144737	SNAP25/SLC1A3/ADORA1/STX1A/GLS/RAB3A/SYT1/TSPOAP1	8
BP	GO:0071634	regulation of transforming growth factor beta production	8/1079	40/18862	0.0016691	0.0188318	0.0144737	LUM/SERPINF2/SERPINB7/THBS1/ITGB8/PTGS2/LTBP1/FKBP1A	8
BP	GO:0055123	digestive system development	17/1079	134/18862	0.00167202	0.0188318	0.0144737	RARRES2/CXCL8/STRA6/GIP/WNT5A/ASS1/HOXA5/NKX3-2/TGFBR2/SFRP1/NKX2-6/PDGFC/DACT1/SRP54/HES1/HLX/SAV1	17
BP	GO:0090101	negative regulation of transmembrane receptor protein serine/threonine kinase signaling pathway	17/1079	134/18862	0.00167202	0.0188318	0.0144737	GREM1/PMEPA1/HTRA3/WNT5A/BMPER/NRROS/NOG/TGFBR2/SFRP1/CHST11/SPRY2/NBL1/LTBP1/SNX6/SMAD7/LEMD3/TGFBR3	17
BP	GO:0019216	regulation of lipid metabolic process	38/1079	402/18862	0.00167677	0.0188463	0.0144848	AKR1C3/MID1IP1/C3/RARRES2/G0S2/IL1B/FLT1/PTK2B/GIP/CD74/APOC1/RUBCNL/ANGPTL4/DGAT2/ADORA1/IRS1/APOE/TNFRSF21/GPS2/FGFR4/NPC2/CCDC3/INSIG1/MFSD2A/TNFAIP8L3/SOX9/CYP51A1/FGF2/PMVK/PTGS2/IDH1/SQLE/IGFBP7/HMGCS1/NPAS2/IDI1/FADS1/SNAI1	38
BP	GO:0001660	fever generation	4/1079	10/18862	0.00169302	0.0189117	0.0145351	PTGES/IL1B/IL1A/PTGS2	4
BP	GO:0035581	sequestering of extracellular ligand from receptor	4/1079	10/18862	0.00169302	0.0189117	0.0145351	GREM1/NRROS/NBL1/LTBP1	4
BP	GO:0060536	cartilage morphogenesis	4/1079	10/18862	0.00169302	0.0189117	0.0145351	STC1/HOXA5/WNT7B/SNAI1	4
BP	GO:0090287	regulation of cellular response to growth factor stimulus	30/1079	296/18862	0.00173825	0.0193014	0.0148346	IL1B/GREM1/PMEPA1/HTRA3/WNT5A/GATA3/XDH/BMPER/NRROS/THBS1/NOG/SEMA6A/SPRY4/TGFBR2/ADAMTS12/SFRP1/CHST11/SPRY2/HHIP/JCAD/NBL1/FGF2/LTBP1/SNX6/SMAD7/HES1/LEMD3/ADAMTS3/CD63/TGFBR3	30
BP	GO:0001736	establishment of planar polarity	16/1079	123/18862	0.00173854	0.0193014	0.0148346	WNT5A/CTHRC1/PSMB9/PSME2/PSMB5/VANGL2/PSME1/PSMB10/PSMB8/PSMC6/SFRP1/PSMA6/DACT1/PRICKLE2/PSMA7/PSMA1	16
BP	GO:0007164	establishment of tissue polarity	16/1079	123/18862	0.00173854	0.0193014	0.0148346	WNT5A/CTHRC1/PSMB9/PSME2/PSMB5/VANGL2/PSME1/PSMB10/PSMB8/PSMC6/SFRP1/PSMA6/DACT1/PRICKLE2/PSMA7/PSMA1	16
BP	GO:0032675	regulation of interleukin-6 production	19/1079	158/18862	0.00174468	0.01933	0.0148566	F2RL1/INAVA/TLR4/IL1B/IL6/CD74/POU2F2/IL1A/TLR2/WNT5A/ZC3H12A/PTPN22/CEBPB/TNFAIP3/TLR6/SYT11/F2R/CYBA/HYAL2	19
BP	GO:0061326	renal tubule development	13/1079	90/18862	0.00177484	0.0195845	0.0150522	GREM1/PAX8/GATA3/LHX1/GDNF/NOG/FMN1/SOX9/WNT7B/FGF2/LAMA5/LIF/HES1	13
BP	GO:1903035	negative regulation of response to wounding	13/1079	90/18862	0.00177484	0.0195845	0.0150522	SERPINF2/SERPINB2/PLAU/CLDN3/C1QTNF1/THBS1/APOE/PLAT/SH2B3/FAP/FGF2/SERPINE2/USF1	13
BP	GO:0046634	regulation of alpha-beta T cell activation	14/1079	101/18862	0.00179969	0.0198184	0.0152319	IL18/PRDM1/ZC3H12A/GATA3/SOCS1/PTPN22/EBI3/LOXL3/TGFBR2/ARG2/SMAD7/HLA-A/NFKBIZ/HLX	14
BP	GO:0042542	response to hydrogen peroxide	17/1079	135/18862	0.00181347	0.0199298	0.0153176	TRPM2/IL6/PTK2B/GPR37L1/SOD2/TNFAIP3/MAP3K5/NQO1/PINK1/RHOB/CYP1B1/BAD/APEX1/PPIF/NET1/PARK7/ERN1	17
BP	GO:1901888	regulation of cell junction assembly	22/1079	195/18862	0.00182415	0.0200068	0.0153767	IL1B/GREM1/NRXN1/COL16A1/CLDN3/TLR2/WNT5A/LRFN5/AMIGO2/SLITRK4/MMP14/THBS1/SRPX2/NRP1/KDR/FMN1/ARF6/SFRP1/CLDN1/SNCA/F11R/SNAI1	22
BP	GO:0001659	temperature homeostasis	20/1079	171/18862	0.00187623	0.0205366	0.0157839	IL18R1/PTGES/G0S2/TLR4/IL1B/TRPM2/IL18/IL1A/ADORA1/PRLR/CEBPB/ID1/MFAP2/ADRB2/PDGFC/PTGS2/NOVA1/TLE3/GPR3/IL15	20
BP	GO:2000106	regulation of leukocyte apoptotic process	12/1079	80/18862	0.00189473	0.0206974	0.0159075	CD74/WNT5A/CXCL12/ADAM8/EFNA1/PIK3CD/FADD/LGALS3/MERTK/IL7R/ARG2/IRF7	12
BP	GO:0007566	embryo implantation	9/1079	50/18862	0.00190206	0.0207359	0.0159371	IL1B/MMP9/STC1/TIMP1/PRLR/MMP2/TGFBR2/LIF/IGFBP7	9
BP	GO:0040037	negative regulation of fibroblast growth factor receptor signaling pathway	6/1079	24/18862	0.00190854	0.0207649	0.0159594	WNT5A/GATA3/THBS1/SPRY4/SPRY2/FGF2	6
BP	GO:0048017	inositol lipid-mediated signaling	22/1079	196/18862	0.0019468	0.0211389	0.0162468	CSF3/F2RL1/CA8/FLT1/GPR143/WNT16/IL18/CSF1R/GATA3/IER3/NYAP1/IRS1/ZP3/KDR/PIK3CD/NKX3-1/TNFAIP8L3/SOX9/PDGFC/FGF2/SERPINE2/F2R	22
BP	GO:0045598	regulation of fat cell differentiation	17/1079	136/18862	0.00196483	0.0212355	0.0163211	TRIB2/RARRES2/IL6/WNT5A/ZC3H12A/GATA3/CEBPB/GPS2/CCDC3/INSIG1/SFRP1/DUSP10/CDS1/PTGS2/CCDC71L/HES1/SAV1	17
BP	GO:0030850	prostate gland development	8/1079	41/18862	0.00197142	0.0212355	0.0163211	WNT5A/PLAG1/NOG/SFRP1/HOXB13/NKX3-1/SOX9/FOXA1	8
BP	GO:0050691	regulation of defense response to virus by host	8/1079	41/18862	0.00197142	0.0212355	0.0163211	ZC3H12A/PTPN22/APOBEC3G/TNFAIP3/APOBEC3F/PQBP1/TRIM6/IL15	8
BP	GO:0030111	regulation of Wnt signaling pathway	35/1079	365/18862	0.00197148	0.0212355	0.0163211	GREM1/SOX7/TLR2/PLPP3/WNT5A/CTHRC1/PSMB9/PSME2/PSMB5/PTPRU/APOE/PSME1/NFATC4/PSMB10/TNFAIP3/NOG/PSMB8/IGFBP4/PSMC6/SFRP1/PSMA6/SOX9/BICC1/APCDD1L/FZD9/JUP/HIC1/DACT3/SDHAF2/TLE3/DACT1/PSMA7/PSMA1/IGFBP6/TMEM9	35
BP	GO:0045123	cellular extravasation	11/1079	70/18862	0.00197521	0.0212355	0.0163211	PECAM1/CXCL12/SPN/CCL2/ITGA1/ADAM8/IL1R1/PIK3CD/FADD/PTGER4/F11R	11
BP	GO:2001242	regulation of intrinsic apoptotic signaling pathway	19/1079	160/18862	0.00201969	0.0216709	0.0166557	VNN1/CD74/MMP9/CXCL12/SOD2/BMF/RPL26/BCL2L2/MAGEA3/NKX3-1/PINK1/PMAIP1/BAD/FIS1/PPIF/PARK7/HTRA2/SNAI1/ERP29	19
BP	GO:0033002	muscle cell proliferation	24/1079	222/18862	0.00207335	0.0222028	0.0170646	SERPINF2/IL6/IL18/MMP9/AKR1B1/NDRG2/TGM2/P2RY6/ITGA2/SOD2/THBS1/TRIB1/MMP2/TNFAIP3/NOG/MAP3K5/TGFBR2/PTGIR/FGF2/IL15/SAV1/KCNK2/TGFBR3/ERN1	24
BP	GO:0034134	toll-like receptor 2 signaling pathway	5/1079	17/18862	0.0021064	0.0225124	0.0173025	F2RL1/TLR2/TNFAIP3/TLR6/CYBA	5
BP	GO:0003231	cardiac ventricle development	15/1079	114/18862	0.00213051	0.0227254	0.0174662	STRA6/WNT5A/GATA3/CPE/TBX3/NOG/TGFBR2/FKBP1A/SMAD7/HECTD1/HES1/NRG1/SAV1/KCNK2/TGFBR3	15
BP	GO:0060828	regulation of canonical Wnt signaling pathway	29/1079	287/18862	0.0021495	0.0228831	0.0175874	GREM1/SOX7/WNT5A/CTHRC1/PSMB9/PSME2/PSMB5/PTPRU/APOE/PSME1/PSMB10/NOG/PSMB8/IGFBP4/PSMC6/SFRP1/PSMA6/SOX9/BICC1/FZD9/JUP/DACT3/SDHAF2/TLE3/DACT1/PSMA7/PSMA1/IGFBP6/TMEM9	29
BP	GO:0032651	regulation of interleukin-1 beta production	14/1079	103/18862	0.00217225	0.0230801	0.0177388	INAVA/TLR4/CARD16/IL6/WNT5A/ZC3H12A/TNFAIP3/TRIM16/ARG2/CASP1/PML/F2R/CASP8/NLRP1	14
BP	GO:0006636	unsaturated fatty acid biosynthetic process	9/1079	51/18862	0.00219455	0.0231364	0.0177821	AKR1C3/PTGS1/PTGES/IL1B/CD74/PLA2G4A/PTGS2/FADS1/PRXL2B	9
BP	GO:0030514	negative regulation of BMP signaling pathway	9/1079	51/18862	0.00219455	0.0231364	0.0177821	GREM1/HTRA3/WNT5A/BMPER/NOG/SFRP1/NBL1/SMAD7/LEMD3	9
BP	GO:0046850	regulation of bone remodeling	9/1079	51/18862	0.00219455	0.0231364	0.0177821	TMEM119/GREM1/IL6/CSF1R/TNFRSF11B/ADAM8/TNFAIP3/SFRP1/LTBP3	9
BP	GO:1903307	positive regulation of regulated secretory pathway	9/1079	51/18862	0.00219455	0.0231364	0.0177821	F2RL1/KLRC2/ITGAM/ZP3/STX1A/UNC13D/CACNA1G/RAB3A/SYT1	9
BP	GO:0051960	regulation of nervous system development	39/1079	422/18862	0.00220254	0.0231757	0.0178122	IL1B/IL6/NRXN1/RASSF10/ISLR2/GPR37L1/TLR2/MAP2/WNT5A/CXCL12/SEMA7A/AMIGO2/PLAG1/CRABP2/SRPX2/TLX2/LPAR3/MAP6/NRP1/TNFRSF21/NFATC4/ID1/NOG/SEMA6A/DUSP10/BIN1/METRN/LIF/SERPINE2/TWF2/PRMT5/PAK3/FOXG1/MYRF/SPINT1/NIN/HES1/RGS14/NKX6-1	39
BP	GO:0061333	renal tubule morphogenesis	11/1079	71/18862	0.00221904	0.0233042	0.017911	GREM1/PAX8/GATA3/LHX1/GDNF/NOG/FMN1/SOX9/FGF2/LAMA5/HES1	11
BP	GO:0035633	maintenance of blood-brain barrier	7/1079	33/18862	0.0022634	0.0237242	0.0182339	PECAM1/IL6/CLDN3/MFSD2A/CLDN1/DMD/F11R	7
BP	GO:0098754	detoxification	17/1079	138/18862	0.00229948	0.0240561	0.018489	PTGS1/PTGES/ALOX5AP/GPX3/SOD2/CLIC2/APOE/RDH11/NQO1/PRDX5/TXNDC17/PTGS2/PRXL2A/MGST3/PARK7/PRXL2B/AKR1A1	17
BP	GO:0006509	membrane protein ectodomain proteolysis	8/1079	42/18862	0.00231524	0.0241281	0.0185443	IL1B/TIMP3/MMP7/TIMP1/APOE/ADAM8/PSENEN/PACSIN3	8
BP	GO:0045687	positive regulation of glial cell differentiation	8/1079	42/18862	0.00231524	0.0241281	0.0185443	TLR2/BIN1/LIF/SERPINE2/PRMT5/SPINT1/HES1/NKX6-1	8
BP	GO:0015908	fatty acid transport	18/1079	150/18862	0.00232918	0.0241934	0.0185944	MID1IP1/PTGES/IL1B/SNAP25/SLC1A3/PLA2G4A/THBS1/ADORA1/APOE/STX1A/GLS/RAB3A/SYT1/MFSD2A/TSPOAP1/CLN8/FIS1/P2RX4	18
BP	GO:0032635	interleukin-6 production	19/1079	162/18862	0.00233039	0.0241934	0.0185944	F2RL1/INAVA/TLR4/IL1B/IL6/CD74/POU2F2/IL1A/TLR2/WNT5A/ZC3H12A/PTPN22/CEBPB/TNFAIP3/TLR6/SYT11/F2R/CYBA/HYAL2	19
BP	GO:0001656	metanephros development	12/1079	82/18862	0.00234698	0.0243192	0.0186911	GREM1/AKR1B1/PAX8/GATA3/LHX1/GDNF/FMN1/NKX3-1/SOX9/WNT7B/LIF/HES1	12
BP	GO:0035335	peptidyl-tyrosine dephosphorylation	14/1079	104/18862	0.00238116	0.0246265	0.0189273	DUSP4/DUSP15/DUSP6/PTPRN/PTPN22/PTPRR/PTPRU/PTPN20/DUSP5/DUSP23/DUSP10/PGP/PTPRK/PTPRE	14
BP	GO:1900120	regulation of receptor binding	6/1079	25/18862	0.0023912	0.0246834	0.018971	MMP9/NRP1/NOG/PHLDA2/NKX3-1/ADAM15	6
BP	GO:0051251	positive regulation of lymphocyte activation	34/1079	356/18862	0.00242061	0.0248925	0.0191318	DPP4/KLRC2/TLR4/IL1B/IL6/IL18/VNN1/CD74/IL1A/GATA3/MMP14/SOCS1/PTPN22/CCDC88B/ICOSLG/EBI3/CCL2/ZP3/PPP2R3C/ADAM8/NFATC2/TGFBR2/FADD/IL7/SH3KBP1/IL7R/DUSP10/PAK3/BAD/HLA-A/NFKBIZ/HES1/HLX/IL15	34
BP	GO:0035296	regulation of tube diameter	16/1079	127/18862	0.00242519	0.0248925	0.0191318	F2RL1/AVPR2/SERPINF2/SOD2/ADORA1/HTR7/APOE/ITGA1/P2RY2/ATP2B1/ADRB2/EDNRA/ADRA1B/DOCK4/GCLM/F2R	16
BP	GO:0097746	blood vessel diameter maintenance	16/1079	127/18862	0.00242519	0.0248925	0.0191318	F2RL1/AVPR2/SERPINF2/SOD2/ADORA1/HTR7/APOE/ITGA1/P2RY2/ATP2B1/ADRB2/EDNRA/ADRA1B/DOCK4/GCLM/F2R	16
BP	GO:0032535	regulation of cellular component size	35/1079	370/18862	0.00247098	0.0253148	0.0194563	CSF3/F2RL1/TENM1/NRCAM/PTK2B/ISLR2/TMSB4Y/SH3BP1/MAP2/WNT5A/CXCL12/SEMA7A/CRABP2/SPTB/LPAR3/APOE/RILP/NRP1/KCNN4/SEMA6A/FMN1/FHOD3/ARF6/CFL2/IL7R/ARPC4/CAPG/ATP13A2/BIN1/TWF2/PAK3/CLN8/ARHGAP18/CDC42EP4/NKX6-1	35
BP	GO:0060560	developmental growth involved in morphogenesis	24/1079	225/18862	0.00247629	0.0253215	0.0194615	NRCAM/ISLR2/MAP2/WNT5A/CXCL12/SEMA7A/CRABP2/NRP2/LPAR3/APOE/CACNG7/LHX1/NRP1/SEMA6A/FMN1/TGFBR2/SFRP1/SPRY2/SYT1/SOX9/WNT7B/TWF2/NIN/NKX6-1	24
BP	GO:0010821	regulation of mitochondrion organization	18/1079	151/18862	0.00250675	0.0254996	0.0195983	MMP9/CHCHD10/BMF/KDR/MLLT11/ATP13A2/PINK1/FZD9/PMAIP1/PDCD5/CASP8/BAD/FIS1/TMEM102/PPIF/PID1/PARK7/HTRA2	18
BP	GO:0002711	positive regulation of T cell mediated immunity	9/1079	52/18862	0.00252173	0.0254996	0.0195983	IL18R1/IL1B/IL6/IL18/GATA3/ZP3/IL1R1/FADD/HLA-A	9
BP	GO:0050433	regulation of catecholamine secretion	9/1079	52/18862	0.00252173	0.0254996	0.0195983	CXCL12/SNCG/STX1A/GDNF/RAB3A/SYT1/SYT11/PINK1/SNCA	9
BP	GO:1901617	organic hydroxy compound biosynthetic process	26/1079	251/18862	0.00252699	0.0254996	0.0195983	AKR1C3/SPTLC3/PTK2B/IP6K3/AKR1B1/WNT5A/P2RY6/GATA3/OPN3/APOE/CYP2R1/FGFR4/QDPR/INSIG1/CYP51A1/FGF2/PMVK/SQLE/SNCA/MSMO1/HMGCS1/IDI1/PGP/HSD17B7/PARK7/SNAI1	26
BP	GO:0051098	regulation of binding	34/1079	357/18862	0.00253295	0.0254996	0.0195983	CSF3/CARD16/MMP9/MAP2/WNT5A/CTHRC1/HMGA2/GATA3/ITGA2/NFKBIA/CLIC2/APOE/NRP1/IFIT2/NES/NFATC4/ID1/NOG/PHLDA2/ADRB2/NKX3-1/LIF/FKBP1A/IFIT1/DACT1/TAF10/ADAM15/DDRGK1/TRIM6/HES1/DNAJB2/PARK7/TGFBR3/EIF2S1	34
BP	GO:0019371	cyclooxygenase pathway	4/1079	11/18862	0.00254058	0.0254996	0.0195983	AKR1C3/PTGS1/PTGES/PTGS2	4
BP	GO:0032306	regulation of prostaglandin secretion	4/1079	11/18862	0.00254058	0.0254996	0.0195983	PTGES/IL1B/PLA2G4A/P2RX4	4
BP	GO:0032308	positive regulation of prostaglandin secretion	4/1079	11/18862	0.00254058	0.0254996	0.0195983	PTGES/IL1B/PLA2G4A/P2RX4	4
BP	GO:0071492	cellular response to UV-A	4/1079	11/18862	0.00254058	0.0254996	0.0195983	MMP9/OPN3/TIMP1/MMP2	4
BP	GO:2000049	positive regulation of cell-cell adhesion mediated by cadherin	4/1079	11/18862	0.00254058	0.0254996	0.0195983	SERPINF2/WNT5A/PTPRU/FOXA1	4
BP	GO:0008344	adult locomotory behavior	10/1079	62/18862	0.00255949	0.0255479	0.0196355	GIP/CXCL12/SNCG/GDNF/GRIN2D/ADAM22/CLN8/PARK7/HTRA2/CSTB	10
BP	GO:0043954	cellular component maintenance	10/1079	62/18862	0.00255949	0.0255479	0.0196355	F2RL1/INAVA/CSF1R/CLDN3/CHCHD10/APOE/ARF6/RAB3A/CLDN1/F2R	10
BP	GO:0045453	bone resorption	10/1079	62/18862	0.00255949	0.0255479	0.0196355	TMEM119/IL6/PTK2B/CSF1R/TNFRSF11B/ADAM8/TNFAIP3/ADRB2/IL7/LTBP3	10
BP	GO:0045069	regulation of viral genome replication	12/1079	83/18862	0.00260407	0.0259453	0.0199409	OASL/CXCL8/ISG20/OAS2/HMGA2/TNIP1/APOBEC3G/PARP10/APOBEC3F/ISG15/IFIT1/TRIM6	12
BP	GO:0035150	regulation of tube size	16/1079	128/18862	0.00262823	0.0261381	0.0200891	F2RL1/AVPR2/SERPINF2/SOD2/ADORA1/HTR7/APOE/ITGA1/P2RY2/ATP2B1/ADRB2/EDNRA/ADRA1B/DOCK4/GCLM/F2R	16
BP	GO:0006941	striated muscle contraction	20/1079	176/18862	0.00264094	0.0262167	0.0201495	HCN4/EHD3/STC1/PDE4D/ZC3H12A/ADORA1/CLIC2/TCAP/CACNA1G/PDE4B/ADRA1B/RANGRF/ARG2/BIN1/JUP/DMD/VEGFB/MAP2K3/SMAD7/P2RX4	20
BP	GO:0034142	toll-like receptor 4 signaling pathway	8/1079	43/18862	0.00270433	0.0266755	0.0205021	F2RL1/TNIP3/TLR4/ITGAM/PTPN22/NFKBIA/CD14/TNFAIP3	8
BP	GO:2000273	positive regulation of signaling receptor activity	8/1079	43/18862	0.00270433	0.0266755	0.0205021	GREM1/BTC/ADORA1/CCL2/NRP1/ADRB2/PINK1/RGS9	8
BP	GO:0010543	regulation of platelet activation	7/1079	34/18862	0.00271168	0.0266755	0.0205021	TLR4/C1QTNF1/PLA2G4A/APOE/SH2B3/SERPINE2/F11R	7
BP	GO:0033280	response to vitamin D	7/1079	34/18862	0.00271168	0.0266755	0.0205021	VDR/STC1/AQP3/ATP2B1/SFRP1/IL15/PHEX	7
BP	GO:0070232	regulation of T cell apoptotic process	7/1079	34/18862	0.00271168	0.0266755	0.0205021	WNT5A/ADAM8/EFNA1/FADD/LGALS3/IL7R/ARG2	7
BP	GO:0002285	lymphocyte activation involved in immune response	21/1079	189/18862	0.0027533	0.027036	0.0207792	IL18R1/F2RL1/KLRC2/TLR4/IL6/PTK2B/IL18/CD74/ZC3H12A/GATA3/LCP1/SPN/LFNG/LOXL3/UNC13D/LGALS3/PTGER4/RELB/SMAD7/NFKBIZ/HLX	21
BP	GO:0032026	response to magnesium ion	5/1079	18/18862	0.00278056	0.0272545	0.0209471	THBS1/TNFRSF11B/CD14/ANK3/SNCA	5
BP	GO:0072009	nephron epithelium development	14/1079	106/18862	0.0028488	0.0278231	0.0213841	PECAM1/GREM1/PAX8/GATA3/LHX1/GDNF/NOG/FMN1/SOX9/WNT7B/FGF2/LAMA5/LIF/HES1	14
BP	GO:1901222	regulation of NIK/NF-kappaB signaling	14/1079	106/18862	0.0028488	0.0278231	0.0213841	IL18R1/TLR4/IL1B/GREM1/IL18/TLR2/ZC3H12A/TCIM/PTPN22/NFKBIA/CD14/LAPTM5/TSPAN6/RASSF2	14
BP	GO:0016125	sterol metabolic process	19/1079	165/18862	0.00287111	0.0279907	0.021513	CYP11A1/CYP26B1/DGAT2/SCARF1/APOE/NPC2/APOL1/INSIG1/CYP51A1/PMVK/SQLE/MSMO1/EBPL/HMGCS1/IDI1/CYP1B1/CLN8/PIP4P1/HSD17B7	19
BP	GO:0050432	catecholamine secretion	9/1079	53/18862	0.0028864	0.0280572	0.0215641	CXCL12/SNCG/STX1A/GDNF/RAB3A/SYT1/SYT11/PINK1/SNCA	9
BP	GO:0046173	polyol biosynthetic process	10/1079	63/18862	0.00288973	0.0280572	0.0215641	SPTLC3/PTK2B/IP6K3/AKR1B1/P2RY6/CYP2R1/QDPR/FGF2/SNCA/PGP	10
BP	GO:0051250	negative regulation of lymphocyte activation	18/1079	153/18862	0.00289597	0.0280572	0.0215641	INHBA/CD74/SAMSN1/ZC3H12A/SOCS1/SPN/PTPN22/TNFRSF21/CEBPB/TNFAIP3/LOXL3/SFRP1/LGALS3/MERTK/LAPTM5/ARG2/SMAD7/HLX	18
BP	GO:0032602	chemokine production	13/1079	95/18862	0.00289855	0.0280572	0.0215641	F2RL1/CXCL6/TLR4/IL1B/IL6/IL18/CD74/CSF1R/TLR2/WNT5A/IL7/ARG2/SIGIRR	13
BP	GO:1900746	regulation of vascular endothelial growth factor signaling pathway	6/1079	26/18862	0.00296016	0.0286027	0.0219833	XDH/SEMA6A/SPRY2/JCAD/ADAMTS3/CD63	6
BP	GO:0046890	regulation of lipid biosynthetic process	22/1079	203/18862	0.00301761	0.0290545	0.0223306	AKR1C3/MID1IP1/C3/IL1B/GIP/CD74/APOC1/DGAT2/APOE/FGFR4/CCDC3/INSIG1/MFSD2A/CYP51A1/PMVK/PTGS2/IDH1/SQLE/IGFBP7/HMGCS1/IDI1/SNAI1	22
BP	GO:0050679	positive regulation of epithelial cell proliferation	22/1079	203/18862	0.00301761	0.0290545	0.0223306	TLR4/WNT5A/CXCL12/PTPRN/PGF/NRP2/NRP1/EMC10/KDR/TNFAIP3/ID1/TNFSF12/NOG/SFRP1/PIK3CD/SOX9/CLDN1/JCAD/FGF2/LAMB1/VEGFB/BAD	22
BP	GO:0019751	polyol metabolic process	16/1079	130/18862	0.00307672	0.0295713	0.0227278	SPTLC3/PTK2B/IP6K3/AKR1B1/PLPP3/P2RY6/PLA2G4A/DGAT2/CYP2R1/QDPR/FGF2/SNCA/PGP/SYNJ2/GALK1/NUDT11	16
BP	GO:0071260	cellular response to mechanical stimulus	11/1079	74/18862	0.00310027	0.0297451	0.0228614	TLR4/IL1B/MMP7/ITGA2/FADD/PTGER4/SOX9/CASP1/CASP8/BAD/F11R	11
BP	GO:0044344	cellular response to fibroblast growth factor stimulus	17/1079	142/18862	0.00311256	0.0298104	0.0229116	CXCL8/WNT5A/GATA3/FGF17/THBS1/CCL2/LHX1/FGFR4/NOG/SPRY4/SFRP1/SPRY2/HHIP/POLR2L/FGF2/GCLM/HYAL2	17
BP	GO:0022898	regulation of transmembrane transporter activity	27/1079	268/18862	0.00312304	0.0298582	0.0229483	EHD3/PTK2B/JPH4/NETO1/CNIH3/MMP9/RASGRF1/CTSS/PDE4D/P2RY6/RRAD/CLIC2/CCL2/CACNG7/ADRB2/PDE4B/RANGRF/ANK3/PINK1/FKBP1A/SNCA/DMD/CAB39/RGS9/PPIF/PARK7/NETO2	27
BP	GO:0008631	intrinsic apoptotic signaling pathway in response to oxidative stress	8/1079	44/18862	0.00314264	0.0299404	0.0230115	VNN1/SOD2/MAP3K5/PINK1/PML/CYP1B1/PARK7/HTRA2	8
BP	GO:0090199	regulation of release of cytochrome c from mitochondria	8/1079	44/18862	0.00314264	0.0299404	0.0230115	MMP9/BMF/MLLT11/PINK1/PMAIP1/PDCD5/BAD/PPIF	8
BP	GO:0002791	regulation of peptide secretion	30/1079	308/18862	0.00316449	0.0300958	0.0231309	F2RL1/DPP4/TLR4/IL1B/IL6/SNAP25/GPR68/GIP/CD74/PAX8/IL1A/TLR2/RAPGEF3/ADORA1/IRS1/APOE/STX1A/ADAM8/KCNN4/KCNS3/ARF6/SFRP1/ATP13A2/CYP51A1/F2R/UQCC2/MPC2/BAD/ERP29/NKX6-1	30
BP	GO:0003279	cardiac septum development	13/1079	96/18862	0.00318127	0.0301514	0.0231736	STRA6/WNT5A/GATA3/NRP2/TBX3/NRP1/NOG/TGFBR2/SMAD7/HECTD1/HES1/SAV1/TGFBR3	13
BP	GO:0045921	positive regulation of exocytosis	12/1079	85/18862	0.00318696	0.0301514	0.0231736	F2RL1/KLRC2/ITGAM/ZP3/RAB27B/STX1A/UNC13D/CACNA1G/RAB3A/SYT1/ATP13A2/SNCA	12
BP	GO:0048041	focal adhesion assembly	12/1079	85/18862	0.00318696	0.0301514	0.0231736	GREM1/PTK2B/COL16A1/MMP14/ITGA2/THBS1/NRP1/KDR/FMN1/SFRP1/AJUBA/PTPRK	12
BP	GO:0002755	MyD88-dependent toll-like receptor signaling pathway	7/1079	35/18862	0.00322503	0.0304058	0.0233692	TLR4/TLR2/TNIP1/CD14/IRAK2/TLR6/IRF7	7
BP	GO:0009154	purine ribonucleotide catabolic process	7/1079	35/18862	0.00322503	0.0304058	0.0233692	PDE4D/XDH/NT5E/PDE4B/AMPD3/HINT1/NUDT11	7
BP	GO:0060411	cardiac septum morphogenesis	10/1079	64/18862	0.0032531	0.0306174	0.0235318	WNT5A/NRP2/TBX3/NRP1/NOG/TGFBR2/SMAD7/HES1/SAV1/TGFBR3	10
BP	GO:0051402	neuron apoptotic process	24/1079	230/18862	0.00329523	0.0309604	0.0237954	PTK2B/GRIK5/ITGAM/GATA3/SOD2/CCL2/APOE/ITGA1/ADAM8/GDNF/TNFRSF21/NES/NFATC4/CEBPB/NQO1/FADD/PINK1/FZD9/SNX6/PAK3/GCLM/F2R/NLRP1/PARK7	24
BP	GO:0043254	regulation of protein-containing complex assembly	40/1079	446/18862	0.00331786	0.0311139	0.0239134	CSF3/TENM1/TLR4/CSF2/PTK2B/PMEPA1/TMSB4Y/MAP2/LCP1/SPTB/BMF/APOE/STX1A/TLR6/FMN1/PSMC6/FHOD3/ARF6/LGALS3/RAB3A/PTGER4/GBP5/SOX9/ARPC4/RANGRF/CAPG/PINK1/BIN1/RPA3/TWF2/SNCA/PAK3/AJUBA/DACT1/NIN/NRG1/FBLIM1/ARHGAP18/PARK7/CDC42EP4	40
BP	GO:0048015	phosphatidylinositol-mediated signaling	21/1079	192/18862	0.00332301	0.0311139	0.0239134	CSF3/F2RL1/CA8/FLT1/GPR143/WNT16/IL18/CSF1R/GATA3/IER3/NYAP1/IRS1/ZP3/KDR/PIK3CD/NKX3-1/SOX9/PDGFC/FGF2/SERPINE2/F2R	21
BP	GO:0002822	regulation of adaptive immune response based on somatic recombination of immune receptors built from immunoglobulin superfamily domains	18/1079	155/18862	0.00333427	0.0311657	0.0239532	IL18R1/C3/IL1B/IL6/IL18/ZC3H12A/GATA3/PLA2G4A/ZP3/TNFAIP3/LOXL3/IL1R1/FADD/IL7R/SMAD7/HLA-A/NFKBIZ/HLX	18
BP	GO:0042129	regulation of T cell proliferation	19/1079	168/18862	0.00351291	0.0327482	0.0251695	IL1B/IL6/IL18/IL1A/SPN/PTPN22/CCDC88B/ICOSLG/EBI3/ZP3/TNFRSF21/CEBPB/TGFBR2/FADD/LGALS3/ARG2/HLA-A/HES1/IL15	19
BP	GO:0060021	roof of mouth development	12/1079	86/18862	0.00351562	0.0327482	0.0251695	INHBA/MSC/WNT5A/TBX3/PRRX1/INSIG1/LOXL3/TGFBR2/ITGB8/CSRNP1/SNAI1/TGFBR3	12
BP	GO:0002544	chronic inflammatory response	5/1079	19/18862	0.00359792	0.0328839	0.0252738	PTGES/VNN1/THBS1/TNFAIP3/UNC13D	5
BP	GO:0060231	mesenchymal to epithelial transition	5/1079	19/18862	0.00359792	0.0328839	0.0252738	GREM1/PAX8/GATA3/GDNF/LIF	5
BP	GO:0072234	metanephric nephron tubule development	5/1079	19/18862	0.00359792	0.0328839	0.0252738	PAX8/SOX9/WNT7B/LIF/HES1	5
BP	GO:0002825	regulation of T-helper 1 type immune response	6/1079	27/18862	0.00362447	0.0328839	0.0252738	IL18R1/IL1B/IL18/PLA2G4A/IL1R1/HLX	6
BP	GO:0060441	epithelial tube branching involved in lung morphogenesis	6/1079	27/18862	0.00362447	0.0328839	0.0252738	HOXA5/SPRY2/SOX9/HHIP/FOXA1/LAMA1	6
BP	GO:0003337	mesenchymal to epithelial transition involved in metanephros morphogenesis	4/1079	12/18862	0.00363952	0.0328839	0.0252738	GREM1/PAX8/GDNF/LIF	4
BP	GO:0031581	hemidesmosome assembly	4/1079	12/18862	0.00363952	0.0328839	0.0252738	LAMC2/LAMB3/COL17A1/CD151	4
BP	GO:0032908	regulation of transforming growth factor beta1 production	4/1079	12/18862	0.00363952	0.0328839	0.0252738	LUM/SERPINB7/THBS1/FKBP1A	4
BP	GO:0034135	regulation of toll-like receptor 2 signaling pathway	4/1079	12/18862	0.00363952	0.0328839	0.0252738	F2RL1/TNFAIP3/TLR6/CYBA	4
BP	GO:0036005	response to macrophage colony-stimulating factor	4/1079	12/18862	0.00363952	0.0328839	0.0252738	TLR4/CSF1R/TLR2/DOK1	4
BP	GO:0036006	cellular response to macrophage colony-stimulating factor stimulus	4/1079	12/18862	0.00363952	0.0328839	0.0252738	TLR4/CSF1R/TLR2/DOK1	4
BP	GO:0036462	TRAIL-activated apoptotic signaling pathway	4/1079	12/18862	0.00363952	0.0328839	0.0252738	TIMP3/FADD/CASP8/PARK7	4
BP	GO:0042118	endothelial cell activation	4/1079	12/18862	0.00363952	0.0328839	0.0252738	TCIM/BMPER/PRMT5/P2RX4	4
BP	GO:0048711	positive regulation of astrocyte differentiation	4/1079	12/18862	0.00363952	0.0328839	0.0252738	BIN1/LIF/SERPINE2/HES1	4
BP	GO:0060394	negative regulation of pathway-restricted SMAD protein phosphorylation	4/1079	12/18862	0.00363952	0.0328839	0.0252738	GREM1/PMEPA1/NOG/SMAD7	4
BP	GO:0110096	cellular response to aldehyde	4/1079	12/18862	0.00363952	0.0328839	0.0252738	AKR1B1/RDH11/PARK7/AKR1A1	4
BP	GO:1900115	extracellular regulation of signal transduction	4/1079	12/18862	0.00363952	0.0328839	0.0252738	GREM1/NRROS/NBL1/LTBP1	4
BP	GO:1900116	extracellular negative regulation of signal transduction	4/1079	12/18862	0.00363952	0.0328839	0.0252738	GREM1/NRROS/NBL1/LTBP1	4
BP	GO:0007585	respiratory gaseous exchange by respiratory system	10/1079	65/18862	0.00365188	0.0328839	0.0252738	ADORA1/HOXA5/TSHZ3/GLS/EDNRA/CHST11/RAB3A/NDUFA12/FUT8/TRAF4	10
BP	GO:0070265	necrotic cell death	10/1079	65/18862	0.00365188	0.0328839	0.0252738	TLR4/CD14/MAP3K5/FADD/CASP1/FZD9/CASP8/IRF3/PPIF/MLKL	10
BP	GO:0002699	positive regulation of immune effector process	23/1079	219/18862	0.00365712	0.0328839	0.0252738	IL18R1/F2RL1/C3/KLRC2/TLR4/IL1B/IL6/IL18/CD74/WNT5A/SEMA7A/ITGAM/GATA3/PTPN22/ZP3/UNC13D/IL1R1/FADD/LAPTM5/TRIM6/HLA-A/NFKBIZ/HLX	23
BP	GO:0042177	negative regulation of protein catabolic process	15/1079	121/18862	0.00381137	0.0342143	0.0262963	LAMP3/TIMP3/TIMP1/RILP/EFNA1/AZIN2/ATP13A2/CYP51A1/SERPINE2/SNCA/PML/ATRAID/DDRGK1/PARK7/TRIM39	15
BP	GO:0070661	leukocyte proliferation	30/1079	312/18862	0.00382122	0.0342462	0.0263208	F2RL1/TLR4/IL1B/GREM1/IL6/IL18/CD74/CSF1R/IL1A/SPN/PTPN22/CCDC88B/ICOSLG/EBI3/ZP3/TNFRSF21/PSMB10/CEBPB/NFATC2/TNFAIP3/TGFBR2/FADD/LGALS3/IL7/IL7R/ARG2/HLA-A/HES1/CD151/IL15	30
BP	GO:0042098	T cell proliferation	21/1079	195/18862	0.0039882	0.0356839	0.0274258	IL1B/IL6/IL18/IL1A/SPN/PTPN22/CCDC88B/ICOSLG/EBI3/ZP3/TNFRSF21/PSMB10/CEBPB/TGFBR2/FADD/LGALS3/ARG2/HLA-A/HES1/CD151/IL15	21
BP	GO:0006816	calcium ion transport	37/1079	409/18862	0.00401318	0.0358485	0.0275523	TRPM2/EHD3/PTK2B/JPH4/STC1/PDE4D/P2RY6/CXCL12/RRAD/CLIC2/LPAR3/PLPP4/CCL2/CACNG7/KCNN4/GRIN2D/ATP2B1/CAMK2A/ORAI3/CACNA1G/LGALS3/PDE4B/FGF2/BIN1/BEST1/FKBP1A/SNCA/DMD/PML/F2R/TPCN1/SARAF/RGS9/PACSIN3/P2RX4/ANXA6/ERO1A	37
BP	GO:0110053	regulation of actin filament organization	27/1079	273/18862	0.00402368	0.0358833	0.027579	CSF3/F2RL1/TENM1/SERPINF2/PTK2B/TMSB4Y/SH3BP1/CXCL12/RAPGEF3/NOX4/SPTB/NRP1/ID1/FMN1/FHOD3/ARF6/SFRP1/CFL2/PTGER4/ARPC4/CAPG/BIN1/TWF2/PAK3/F11R/ARHGAP18/CDC42EP4	27
BP	GO:0061035	regulation of cartilage development	10/1079	66/18862	0.00408843	0.0362717	0.0278775	GREM1/PTHLH/WNT5A/SOX5/NKX3-2/NOG/ADAMTS12/SOX9/LTBP3/SMAD7	10
BP	GO:0045444	fat cell differentiation	23/1079	221/18862	0.00409237	0.0362717	0.0278775	TRIB2/RARRES2/IL6/IL11/WNT5A/ZC3H12A/HMGA2/GATA3/SOCS1/CEBPB/GPS2/PSMB8/CCDC3/INSIG1/ADRB2/SFRP1/DUSP10/CDS1/PTGS2/CCDC71L/HES1/SAV1/ERO1A	23
BP	GO:0050670	regulation of lymphocyte proliferation	23/1079	221/18862	0.00409237	0.0362717	0.0278775	TLR4/IL1B/IL6/IL18/CD74/IL1A/SPN/PTPN22/CCDC88B/ICOSLG/EBI3/ZP3/TNFRSF21/CEBPB/NFATC2/TGFBR2/FADD/LGALS3/IL7/ARG2/HLA-A/HES1/IL15	23
BP	GO:1902652	secondary alcohol metabolic process	18/1079	158/18862	0.0040939	0.0362717	0.0278775	CYP11A1/DGAT2/SCARF1/APOE/CYP2R1/NPC2/APOL1/INSIG1/CYP51A1/PMVK/IDH1/SQLE/MSMO1/HMGCS1/IDI1/CLN8/PIP4P1/HSD17B7	18
BP	GO:0042775	mitochondrial ATP synthesis coupled electron transport	13/1079	99/18862	0.00416658	0.0368229	0.0283012	COX6A1/UQCC3/COX8A/NDUFB2/PINK1/NDUFA1/SNCA/SDHAF2/NDUFA12/UQCR10/ISCU/UQCRC1/PARK7	13
BP	GO:0003044	regulation of systemic arterial blood pressure mediated by a chemical signal	8/1079	46/18862	0.00418319	0.0368229	0.0283012	F2RL1/AVPR2/SERPINF2/PDE4D/SOD2/ADRB2/ADRA1B/F2R	8
BP	GO:0048483	autonomic nervous system development	8/1079	46/18862	0.00418319	0.0368229	0.0283012	GATA3/NRP2/TLX2/NRP1/GDNF/EDNRA/HES1/HLX	8
BP	GO:2000107	negative regulation of leukocyte apoptotic process	8/1079	46/18862	0.00418319	0.0368229	0.0283012	CD74/CXCL12/EFNA1/FADD/MERTK/IL7R/ARG2/IRF7	8
BP	GO:0003012	muscle system process	40/1079	453/18862	0.00433536	0.0381007	0.0292833	HCN4/IL1B/EHD3/STC1/PDE4D/ZC3H12A/TBX3/ITGA2/ADORA1/HTR7/CLIC2/ITGA1/SSTR2/PABPN1/GDNF/ATP2B1/TCAP/ADRB2/EDNRA/CACNA1G/PDE4B/ADRA1B/RANGRF/ARG2/MYL6/DOCK4/BIN1/JUP/LMCD1/MYL6B/DMD/F2R/VEGFB/MAP2K3/CYBA/ITGB5/SMAD7/IL15/P2RX4/ANXA6	40
BP	GO:0046660	female sex differentiation	14/1079	111/18862	0.00435435	0.0382059	0.0293642	INHBA/STRA6/PTX3/WNT5A/MMP14/PTPRN/TBX3/ZP3/LHX1/CEBPB/VGF/SFRP1/MERTK/IDH1	14
BP	GO:0010575	positive regulation of vascular endothelial growth factor production	6/1079	28/18862	0.0043933	0.0384856	0.0295791	C3/IL1B/IL6/IL1A/PTGS2/CYP1B1	6
BP	GO:1902903	regulation of supramolecular fiber organization	34/1079	370/18862	0.0044531	0.0388204	0.0298364	CSF3/F2RL1/MID1IP1/TENM1/SERPINF2/PTK2B/TMSB4Y/SH3BP1/MAP2/CXCL12/RAPGEF3/NOX4/SPTB/APOE/NRP1/ID1/FMN1/FHOD3/ARF6/SFRP1/CFL2/PTGER4/ARPC4/RANGRF/CAPG/BIN1/TWF2/SNCA/PAK3/NIN/F11R/ARHGAP18/PARK7/CDC42EP4	34
BP	GO:0007173	epidermal growth factor receptor signaling pathway	15/1079	123/18862	0.00445311	0.0388204	0.0298364	PTK2B/FAM83A/MMP9/BTC/IFI6/ADORA1/ITGA1/REPS2/SPRY2/SOX9/SH3KBP1/SNX6/DOK1/MVP/RASSF2	15
BP	GO:0046329	negative regulation of JNK cascade	7/1079	37/18862	0.00447053	0.0388204	0.0298364	F2RL1/PTPN22/GPS2/SFRP1/DUSP10/PINK1/DACT1	7
BP	GO:0046633	alpha-beta T cell proliferation	7/1079	37/18862	0.00447053	0.0388204	0.0298364	IL18/PTPN22/EBI3/TGFBR2/ARG2/HLA-A/IL15	7
BP	GO:0043523	regulation of neuron apoptotic process	21/1079	197/18862	0.00449051	0.0388204	0.0298364	PTK2B/GRIK5/ITGAM/GATA3/SOD2/CCL2/APOE/ITGA1/ADAM8/GDNF/NES/NFATC4/CEBPB/NQO1/PINK1/FZD9/SNX6/PAK3/GCLM/F2R/PARK7	21
BP	GO:0008630	intrinsic apoptotic signaling pathway in response to DNA damage	13/1079	100/18862	0.00454497	0.0388204	0.0298364	CD74/BCL2A1/CXCL12/IKBKE/RPL26/NFATC4/BCL2L2/PHLDA3/HIC1/PML/BAD/HTRA2/SNAI1	13
BP	GO:0042773	ATP synthesis coupled electron transport	13/1079	100/18862	0.00454497	0.0388204	0.0298364	COX6A1/UQCC3/COX8A/NDUFB2/PINK1/NDUFA1/SNCA/SDHAF2/NDUFA12/UQCR10/ISCU/UQCRC1/PARK7	13
BP	GO:0006022	aminoglycan metabolic process	19/1079	172/18862	0.00455007	0.0388204	0.0298364	LUM/NDST3/IL1B/CHI3L2/B3GNT8/CSGALNACT1/CHSY3/CHST11/B4GAT1/CHST7/CHST2/FGF2/DSE/HS3ST3A1/HS3ST3B1/IL15/SDC3/HYAL2/IDS	19
BP	GO:0015800	acidic amino acid transport	10/1079	67/18862	0.00456516	0.0388204	0.0298364	SNAP25/SLC1A3/ADORA1/STX1A/GLS/RAB3A/LRRC8C/SYT1/TSPOAP1/CLN8	10
BP	GO:0046637	regulation of alpha-beta T cell differentiation	10/1079	67/18862	0.00456516	0.0388204	0.0298364	IL18/PRDM1/ZC3H12A/GATA3/SOCS1/LOXL3/TGFBR2/SMAD7/NFKBIZ/HLX	10
BP	GO:2000514	regulation of CD4-positive, alpha-beta T cell activation	10/1079	67/18862	0.00456516	0.0388204	0.0298364	IL18/ZC3H12A/GATA3/SOCS1/LOXL3/TGFBR2/ARG2/SMAD7/NFKBIZ/HLX	10
BP	GO:0032944	regulation of mononuclear cell proliferation	23/1079	223/18862	0.00457008	0.0388204	0.0298364	TLR4/IL1B/IL6/IL18/CD74/IL1A/SPN/PTPN22/CCDC88B/ICOSLG/EBI3/ZP3/TNFRSF21/CEBPB/NFATC2/TGFBR2/FADD/LGALS3/IL7/ARG2/HLA-A/HES1/IL15	23
BP	GO:0045089	positive regulation of innate immune response	23/1079	223/18862	0.00457008	0.0388204	0.0298364	KLRC2/TLR4/WNT5A/PSMB9/PSME2/IKBKE/PSMB5/ADAM8/PSME1/PSMB10/PSMB8/PSMC6/PSMA6/FADD/GBP5/PAK3/PQBP1/RELB/PSMA7/PSMA1/IRF3/TRIM6/IRF7	23
BP	GO:0032495	response to muramyl dipeptide	5/1079	20/18862	0.00457424	0.0388204	0.0298364	INAVA/PTPN22/NFKBIA/TNFAIP3/NLRP1	5
BP	GO:0035988	chondrocyte proliferation	5/1079	20/18862	0.00457424	0.0388204	0.0298364	STC1/HMGA2/MMP14/SOX9/SMAD7	5
BP	GO:0044342	type B pancreatic cell proliferation	5/1079	20/18862	0.00457424	0.0388204	0.0298364	PTPRN/IGFBP4/SFRP1/BAD/NKX6-1	5
BP	GO:0051767	nitric-oxide synthase biosynthetic process	5/1079	20/18862	0.00457424	0.0388204	0.0298364	TLR4/TLR2/CCL2/KDR/NAMPT	5
BP	GO:0051769	regulation of nitric-oxide synthase biosynthetic process	5/1079	20/18862	0.00457424	0.0388204	0.0298364	TLR4/TLR2/CCL2/KDR/NAMPT	5
BP	GO:0071379	cellular response to prostaglandin stimulus	5/1079	20/18862	0.00457424	0.0388204	0.0298364	AKR1C3/GNG2/PTGER2/SFRP1/PTGER4	5
BP	GO:1902176	negative regulation of oxidative stress-induced intrinsic apoptotic signaling pathway	5/1079	20/18862	0.00457424	0.0388204	0.0298364	VNN1/SOD2/PINK1/PARK7/HTRA2	5
BP	GO:0032642	regulation of chemokine production	12/1079	89/18862	0.00466851	0.0394972	0.0303566	F2RL1/CXCL6/TLR4/IL1B/IL6/CD74/CSF1R/TLR2/WNT5A/IL7/ARG2/SIGIRR	12
BP	GO:0097306	cellular response to alcohol	12/1079	89/18862	0.00466851	0.0394972	0.0303566	AKR1C3/INHBA/GNG2/PTGER2/CCL7/SOD2/ATP2B1/SFRP1/PTGER4/JUP/HMGCS1/ADAM15	12
BP	GO:0002709	regulation of T cell mediated immunity	11/1079	78/18862	0.00469047	0.0396214	0.030452	IL18R1/IL1B/IL6/IL18/GATA3/ZP3/IL1R1/FADD/IL7R/SMAD7/HLA-A	11
BP	GO:0030278	regulation of ossification	14/1079	112/18862	0.00472154	0.039822	0.0306062	TMEM119/GREM1/PTK2B/WNT5A/ATP2B1/ADRB2/SFRP1/PTGER4/SOX9/ISG15/FZD9/ATRAID/LTBP3/SMAD7	14
BP	GO:0051480	regulation of cytosolic calcium ion concentration	32/1079	344/18862	0.00474324	0.0399431	0.0306993	F2RL1/TRPM2/PTK2B/JPH4/TGM2/PDE4D/C1QTNF1/WNT5A/PTGER2/P2RY6/GPR4/ADORA1/CLIC2/LPAR3/GRIN2D/ATP2B1/EDNRA/PTGIR/PTGER4/ADRA1B/TSPOAP1/FGF2/FZD9/FKBP1A/SNCA/DMD/PML/F2R/TPCN1/FIS1/P2RX4/ERO1A	32
BP	GO:0006119	oxidative phosphorylation	17/1079	148/18862	0.00476773	0.0400254	0.0307625	CHCHD10/ATP5ME/COX6A1/UQCC3/COX8A/NDUFB2/PINK1/NDUFA1/SNCA/SDHAF2/NDUFA12/UQCR10/UQCC2/ISCU/UQCRC1/PPIF/PARK7	17
BP	GO:0071774	response to fibroblast growth factor	17/1079	148/18862	0.00476773	0.0400254	0.0307625	CXCL8/WNT5A/GATA3/FGF17/THBS1/CCL2/LHX1/FGFR4/NOG/SPRY4/SFRP1/SPRY2/HHIP/POLR2L/FGF2/GCLM/HYAL2	17
BP	GO:0030857	negative regulation of epithelial cell differentiation	8/1079	47/18862	0.00479386	0.0401478	0.0308566	MMP9/NOTCH4/XDH/TBX3/ID1/SPRY2/SOX9/HES1	8
BP	GO:0007178	transmembrane receptor protein serine/threonine kinase signaling pathway	33/1079	358/18862	0.00479707	0.0401478	0.0308566	INHBA/GREM1/PMEPA1/HTRA3/DUSP15/WNT5A/LPXN/BMPER/NRROS/THBS1/ID1/NOG/LTBP2/TGFBR2/SFRP1/CHST11/ITGB8/SPRY2/NBL1/LTBP1/RUNX2/FKBP1A/SNX6/PML/LTBP3/PTPRK/ITGB5/SMAD7/HES1/LEMD3/F11R/FUT8/TGFBR3	33
BP	GO:0006721	terpenoid metabolic process	15/1079	124/18862	0.00480547	0.0401563	0.0308632	AKR1C3/RARRES2/STRA6/AKR1B1/CYP26B1/PLB1/CRABP2/DGAT2/CYP2S1/APOE/RDH11/HMGCS1/CYP1B1/SDC3/HTRA2	15
BP	GO:0060284	regulation of cell development	42/1079	485/18862	0.00495689	0.0413581	0.0317868	IL1B/IL6/GPR68/PTHLH/RASSF10/ISLR2/GPR37L1/TLR2/MAP2/WNT5A/CXCL12/SEMA7A/PLAG1/CRABP2/TLX2/LPAR3/MAP6/TRIB1/NRP1/NFATC4/ID1/NOG/SEMA6A/SPRY4/UNC13D/DUSP10/BIN1/METRN/LIF/SERPINE2/TWF2/PRMT5/PAK3/FOXG1/SPINT1/NIN/SMAD7/BAD/HES1/RGS14/F11R/NKX6-1	42
BP	GO:0031589	cell-substrate adhesion	33/1079	359/18862	0.00500215	0.041387	0.0318091	GREM1/PTK2B/COL16A1/PLAU/ITGA11/LPXN/LAMB3/COL17A1/MMP14/ITGA2/THBS1/ITGA1/NRP1/ITGA7/KDR/ID1/ATRNL1/EFNA1/FMN1/SPRY4/UNC13D/ADAMTS12/SFRP1/MERTK/LAMA5/JUP/LAMB1/RRAS/AJUBA/ADAM15/PTPRK/ITGB5/CD63	33
BP	GO:0010755	regulation of plasminogen activation	4/1079	13/18862	0.00502122	0.041387	0.0318091	SERPINF2/THBS1/PLGRKT/SERPINE2	4
BP	GO:0031665	negative regulation of lipopolysaccharide-mediated signaling pathway	4/1079	13/18862	0.00502122	0.041387	0.0318091	CARD16/TRIB1/TNFAIP3/SIGIRR	4
BP	GO:0032354	response to follicle-stimulating hormone	4/1079	13/18862	0.00502122	0.041387	0.0318091	INHBA/HMGCS1/GCLM/TGFBR3	4
BP	GO:0070424	regulation of nucleotide-binding oligomerization domain containing signaling pathway	4/1079	13/18862	0.00502122	0.041387	0.0318091	TLR4/SLC15A3/PTPN22/TNFAIP3	4
BP	GO:0071599	otic vesicle development	4/1079	13/18862	0.00502122	0.041387	0.0318091	PAX8/GATA3/TCAP/SOX9	4
BP	GO:0072182	regulation of nephron tubule epithelial cell differentiation	4/1079	13/18862	0.00502122	0.041387	0.0318091	PAX8/GATA3/LHX1/LIF	4
BP	GO:1902043	positive regulation of extrinsic apoptotic signaling pathway via death domain receptors	4/1079	13/18862	0.00502122	0.041387	0.0318091	TIMP3/THBS1/SFRP1/PMAIP1	4
BP	GO:0051283	negative regulation of sequestering of calcium ion	14/1079	113/18862	0.00511336	0.0418323	0.0321513	TRPM2/PTK2B/JPH4/PDE4D/P2RY6/CLIC2/FGF2/FKBP1A/SNCA/DMD/F2R/TPCN1/ANXA6/ERO1A	14
BP	GO:0014033	neural crest cell differentiation	12/1079	90/18862	0.00511369	0.0418323	0.0321513	SEMA7A/NRP2/NRP1/GDNF/SEMA6A/EDNRA/SFRP1/SOX9/LAMA5/HES1/NRG1/ANXA6	12
BP	GO:0014068	positive regulation of phosphatidylinositol 3-kinase signaling	12/1079	90/18862	0.00511369	0.0418323	0.0321513	CSF3/F2RL1/FLT1/WNT16/IL18/KDR/PIK3CD/NKX3-1/SOX9/PDGFC/FGF2/F2R	12
BP	GO:0090559	regulation of membrane permeability	12/1079	90/18862	0.00511369	0.0418323	0.0321513	CLDN3/CHCHD10/BMF/CAMK2A/LAPTM5/FZD9/PMAIP1/CASP8/BAD/F11R/TMEM102/PPIF	12
BP	GO:1903557	positive regulation of tumor necrosis factor superfamily cytokine production	12/1079	90/18862	0.00511369	0.0418323	0.0321513	TLR4/IL6/IL1A/TLR2/WNT5A/SPN/THBS1/CD14/ADAM8/NFATC4/FADD/CYBA	12
BP	GO:0001776	leukocyte homeostasis	11/1079	79/18862	0.00517471	0.0420594	0.0323259	CXCL6/IL6/CD74/PPP2R3C/TNFAIP3/PIK3CD/FADD/MERTK/SH2B3/PDE4B/PMAIP1	11
BP	GO:0001892	embryonic placenta development	11/1079	79/18862	0.00517471	0.0420594	0.0323259	CSF2/CEBPB/SPINT2/PHLDA2/VASH1/WNT7B/LIF/SPINT1/CASP8/HES1/SNAI1	11
BP	GO:0015844	monoamine transport	11/1079	79/18862	0.00517471	0.0420594	0.0323259	CXCL12/SNCG/STX1A/GDNF/SLC22A3/RAB3A/SYT1/SYT11/PINK1/SNCA/PARK7	11
BP	GO:0048565	digestive tract development	15/1079	125/18862	0.00518011	0.0420594	0.0323259	RARRES2/CXCL8/STRA6/WNT5A/ASS1/HOXA5/NKX3-2/TGFBR2/SFRP1/NKX2-6/PDGFC/DACT1/HES1/HLX/SAV1	15
BP	GO:0072175	epithelial tube formation	15/1079	125/18862	0.00518011	0.0420594	0.0323259	GREM1/PAX8/WNT5A/CTHRC1/GATA3/GDNF/VANGL2/SPINT2/NOG/TCAP/SFRP1/PIK3CD/SOX9/FGF2/SPINT1	15
BP	GO:0001504	neurotransmitter uptake	7/1079	38/18862	0.00521478	0.0422149	0.0324453	SNAP25/SLC1A3/GDNF/SLC22A3/SNCA/CLN8/PARK7	7
BP	GO:2000249	regulation of actin cytoskeleton reorganization	7/1079	38/18862	0.00521478	0.0422149	0.0324453	CSF3/TRPM2/PTK2B/CSF1R/RAPGEF3/NRP1/F11R	7
BP	GO:0051090	regulation of DNA-binding transcription factor activity	39/1079	444/18862	0.00524443	0.0422977	0.032509	CSF3/IL18R1/CYTL1/TLR4/IL1B/GREM1/CARD16/IL6/IL18/TLR2/PLPP3/WNT5A/ZC3H12A/NFKBIA/TRIB1/ADAM8/IRAK2/TNFAIP3/PARP10/TLR6/ID1/CAMK2A/PSMA6/NKX3-1/FOXA1/PINK1/JUP/NFKBIE/CYP1B1/SIGIRR/DDRGK1/SMAD7/TRIM6/HES1/SAV1/PARK7/ANXA3/RNF25/NKX6-1	39
BP	GO:0043271	negative regulation of ion transport	30/1079	319/18862	0.00524834	0.0422977	0.032509	IL1B/PTK2B/CD74/APOC1/MMP9/STC1/RRAD/THBS1/ADORA1/IRS1/CLIC2/APOE/INSIG1/SFRP1/PKIA/SYT11/ANK3/CYP51A1/BIN1/SERPINE2/SNCA/F2R/ISCU/CAB39/FIS1/PACSIN3/PPIF/PID1/PARK7/ERP29	30
BP	GO:0048638	regulation of developmental growth	30/1079	319/18862	0.00524834	0.0422977	0.032509	NRCAM/ISLR2/MAP2/WNT5A/CXCL12/SEMA7A/DUSP6/CRABP2/LPAR3/ZP3/APOE/CACNG7/NRP1/NOG/SEMA6A/ADRB2/TGFBR2/SYT1/MFSD2A/IL7/DUSP10/FGF2/TWF2/SMAD7/HLX/SAV1/HTRA2/KCNK2/TGFBR3/NKX6-1	30
BP	GO:0001773	myeloid dendritic cell activation	6/1079	29/18862	0.00527595	0.0423947	0.0325835	DHRS2/CSF2/BATF3/TGFBR2/ITGB8/RELB	6
BP	GO:0090162	establishment of epithelial cell polarity	6/1079	29/18862	0.00527595	0.0423947	0.0325835	SH3BP1/WNT5A/ARF6/LAMA1/CYTH1/HES1	6
BP	GO:0061005	cell differentiation involved in kidney development	9/1079	58/18862	0.00537688	0.0431343	0.033152	GREM1/MMP9/PAX8/GATA3/GPR4/LHX1/GDNF/LIF/HES1	9
BP	GO:0050708	regulation of protein secretion	27/1079	279/18862	0.00538386	0.0431343	0.033152	F2RL1/DPP4/TLR4/IL1B/IL6/SNAP25/GPR68/GIP/IL1A/TLR2/RAPGEF3/IRS1/APOE/STX1A/ADAM8/KCNN4/KCNS3/ARF6/SFRP1/ATP13A2/CYP51A1/F2R/UQCC2/MPC2/BAD/ERP29/NKX6-1	27
BP	GO:0042391	regulation of membrane potential	38/1079	431/18862	0.00546674	0.0436125	0.0335195	HCN4/NRXN1/EHD3/PTK2B/NETO1/CNIH3/GRIK5/CHCHD10/IFI6/SOD2/ADORA1/PPP2R3C/STX1A/KCNN4/KDR/GRIN2D/ADRB2/MLLT11/CACNA1G/POPDC3/GABRA3/RANGRF/ANK3/PINK1/BIN1/CASP1/FZD9/JUP/PMAIP1/DMD/KCNK1/GCLM/SMAD7/BAD/P2RX4/PID1/PARK7/KCNK2	38
BP	GO:0035850	epithelial cell differentiation involved in kidney development	8/1079	48/18862	0.00547054	0.0436125	0.0335195	GREM1/MMP9/PAX8/GATA3/GPR4/LHX1/GDNF/LIF	8
BP	GO:0060688	regulation of morphogenesis of a branching structure	8/1079	48/18862	0.00547054	0.0436125	0.0335195	GREM1/PAX8/WNT5A/LHX1/GDNF/NOG/SFRP1/SOX9	8
BP	GO:0051897	positive regulation of protein kinase B signaling	19/1079	175/18862	0.00548363	0.0436125	0.0335195	AKR1C3/CSF3/IL18/BTC/C1QTNF1/GATA3/FGF17/THBS1/IRS1/ADAM8/FGFR4/PIK3CD/SPRY2/TNFAIP8L3/PINK1/FGF2/NRG1/P2RX4/PARK7	19
BP	GO:0097696	receptor signaling pathway via STAT	19/1079	175/18862	0.00548363	0.0436125	0.0335195	OCIAD2/IL6/CSF2/PTK2B/IL18/CSF1R/IL24/AKR1B1/SOCS1/PRLR/CCL2/IL31RA/SH2B3/IL7R/LIF/CYP1B1/F2R/HES1/IL15	19
BP	GO:0006023	aminoglycan biosynthetic process	14/1079	114/18862	0.00553096	0.0438652	0.0337137	LUM/NDST3/IL1B/B3GNT8/CSGALNACT1/CHSY3/CHST11/B4GAT1/CHST7/CHST2/DSE/HS3ST3A1/HS3ST3B1/SDC3	14
BP	GO:0001889	liver development	16/1079	138/18862	0.00554765	0.0438652	0.0337137	IL6/ASS1/ITGA2/CEBPB/TNFAIP3/QDPR/ARF6/SOX9/CLDN1/PRMT5/HMGCS1/GNPNAT1/TAF10/HES1/HLX/TGFBR3	16
BP	GO:0051961	negative regulation of nervous system development	16/1079	138/18862	0.00554765	0.0438652	0.0337137	IL1B/IL6/GPR37L1/TLR2/MAP2/WNT5A/SEMA7A/TLX2/NRP1/NFATC4/ID1/NOG/SEMA6A/DUSP10/HES1/NKX6-1	16
BP	GO:0072006	nephron development	16/1079	138/18862	0.00554765	0.0438652	0.0337137	PECAM1/GREM1/SERPINB7/PAX8/GATA3/GPR4/LHX1/GDNF/NOG/FMN1/SOX9/WNT7B/FGF2/LAMA5/LIF/HES1	16
BP	GO:0050688	regulation of defense response to virus	10/1079	69/18862	0.00564911	0.0446026	0.0342805	ZC3H12A/PTPN22/APOBEC3G/TNFAIP3/APOBEC3F/IFIT1/PQBP1/TSPAN6/TRIM6/IL15	10
BP	GO:0014032	neural crest cell development	11/1079	80/18862	0.00569761	0.0446195	0.0342935	SEMA7A/NRP2/NRP1/GDNF/SEMA6A/EDNRA/SOX9/LAMA5/HES1/NRG1/ANXA6	11
BP	GO:0019370	leukotriene biosynthetic process	5/1079	21/18862	0.00572508	0.0446195	0.0342935	GGT5/ALOX5AP/GGT1/PLA2G4A/MGST3	5
BP	GO:0031629	synaptic vesicle fusion to presynaptic active zone membrane	5/1079	21/18862	0.00572508	0.0446195	0.0342935	SNAP25/GRIK5/STX1A/RAB3A/SYT1	5
BP	GO:0035455	response to interferon-alpha	5/1079	21/18862	0.00572508	0.0446195	0.0342935	LAMP3/GATA3/MX2/IFIT2/IFIT3	5
BP	GO:0046641	positive regulation of alpha-beta T cell proliferation	5/1079	21/18862	0.00572508	0.0446195	0.0342935	IL18/PTPN22/EBI3/TGFBR2/HLA-A	5
BP	GO:0071636	positive regulation of transforming growth factor beta production	5/1079	21/18862	0.00572508	0.0446195	0.0342935	LUM/SERPINF2/SERPINB7/THBS1/PTGS2	5
BP	GO:0072170	metanephric tubule development	5/1079	21/18862	0.00572508	0.0446195	0.0342935	PAX8/SOX9/WNT7B/LIF/HES1	5
BP	GO:0099500	vesicle fusion to plasma membrane	5/1079	21/18862	0.00572508	0.0446195	0.0342935	SNAP25/GRIK5/STX1A/RAB3A/SYT1	5
BP	GO:2000047	regulation of cell-cell adhesion mediated by cadherin	5/1079	21/18862	0.00572508	0.0446195	0.0342935	SERPINF2/NOTCH4/WNT5A/PTPRU/FOXA1	5
BP	GO:0003205	cardiac chamber development	17/1079	151/18862	0.00583226	0.0453872	0.0348835	STRA6/WNT5A/GATA3/CPE/NRP2/TBX3/NRP1/NOG/TGFBR2/FKBP1A/SMAD7/HECTD1/HES1/NRG1/SAV1/KCNK2/TGFBR3	17
BP	GO:0032526	response to retinoic acid	13/1079	103/18862	0.00584861	0.0453872	0.0348835	PTGES/PTK2B/TIE1/CYP26B1/WNT5A/AQP3/DNAAF2/TRIM16/SOX9/WNT7B/TWF2/IGFBP7/HTRA2	13
BP	GO:2001237	negative regulation of extrinsic apoptotic signaling pathway	13/1079	103/18862	0.00584861	0.0453872	0.0348835	IL1B/CSF2/IL1A/IFI6/THBS1/GDNF/TNFAIP3/FADD/LGALS3/IL7/GCLM/CASP8/PARK7	13
BP	GO:0022408	negative regulation of cell-cell adhesion	20/1079	189/18862	0.00592703	0.0459302	0.0353009	CD74/NOTCH4/C1QTNF1/ZC3H12A/CXCL12/ASS1/SOCS1/SPN/PTPN22/TNFRSF21/CEBPB/SPINT2/LOXL3/LGALS3/LAPTM5/SH2B3/ARG2/SERPINE2/SMAD7/HLX	20
BP	GO:0003206	cardiac chamber morphogenesis	14/1079	115/18862	0.00597553	0.0460437	0.0353881	WNT5A/GATA3/CPE/NRP2/TBX3/NRP1/NOG/TGFBR2/FKBP1A/SMAD7/HES1/NRG1/SAV1/TGFBR3	14
BP	GO:0033559	unsaturated fatty acid metabolic process	14/1079	115/18862	0.00597553	0.0460437	0.0353881	AKR1C3/PTGS1/PTGES/IL1B/CD74/PLA2G4A/CYP2J2/CYP2S1/MGLL/PTGS2/CYP1B1/ACAA1/FADS1/PRXL2B	14
BP	GO:0051282	regulation of sequestering of calcium ion	14/1079	115/18862	0.00597553	0.0460437	0.0353881	TRPM2/PTK2B/JPH4/PDE4D/P2RY6/CLIC2/FGF2/FKBP1A/SNCA/DMD/F2R/TPCN1/ANXA6/ERO1A	14
BP	GO:1903510	mucopolysaccharide metabolic process	14/1079	115/18862	0.00597553	0.0460437	0.0353881	LUM/NDST3/IL1B/CSGALNACT1/CHSY3/CHST11/B4GAT1/CHST7/CHST2/FGF2/DSE/IL15/HYAL2/IDS	14
BP	GO:0019369	arachidonic acid metabolic process	9/1079	59/18862	0.00603047	0.0461403	0.0354623	AKR1C3/PTGS1/PTGES/PLA2G4A/CYP2J2/CYP2S1/MGLL/PTGS2/CYP1B1	9
BP	GO:0045428	regulation of nitric oxide biosynthetic process	9/1079	59/18862	0.00603047	0.0461403	0.0354623	TLR4/IL1B/PTK2B/PTX3/ZC3H12A/ASS1/TLR6/PTGS2/P2RX4	9
BP	GO:0048488	synaptic vesicle endocytosis	9/1079	59/18862	0.00603047	0.0461403	0.0354623	MX2/SNCG/RAB27B/STX1A/ARF6/SYT1/SYT11/SNCA/SYNJ2	9
BP	GO:0140238	presynaptic endocytosis	9/1079	59/18862	0.00603047	0.0461403	0.0354623	MX2/SNCG/RAB27B/STX1A/ARF6/SYT1/SYT11/SNCA/SYNJ2	9
BP	GO:1902041	regulation of extrinsic apoptotic signaling pathway via death domain receptors	9/1079	59/18862	0.00603047	0.0461403	0.0354623	TIMP3/THBS1/TNFAIP3/SFRP1/FADD/LGALS3/PMAIP1/CASP8/PARK7	9
BP	GO:0007162	negative regulation of cell adhesion	28/1079	295/18862	0.00604971	0.0462225	0.0355255	CD74/NOTCH4/C1QTNF1/ZC3H12A/CXCL12/LPXN/MMP14/ASS1/SOCS1/SPN/PTPN22/THBS1/TNFRSF21/CEBPB/SPINT2/SEMA6A/SPRY4/LOXL3/LGALS3/LAPTM5/SH2B3/ARG2/SERPINE2/ADAM22/CYP1B1/ADAM15/SMAD7/HLX	28
BP	GO:0001936	regulation of endothelial cell proliferation	19/1079	177/18862	0.00618913	0.0471553	0.0362424	FLT1/TIE1/WNT5A/CXCL12/XDH/PGF/NRP2/THBS1/CCL2/APOE/NRP1/EMC10/KDR/TNFSF12/VASH1/PIK3CD/JCAD/FGF2/VEGFB	19
BP	GO:0008217	regulation of blood pressure	19/1079	177/18862	0.00618913	0.0471553	0.0362424	F2RL1/PTGS1/RARRES2/AVPR2/SERPINF2/ANPEP/GPR37L1/PDE4D/SOD2/ADORA1/TRHDE/ATP2B1/ADRB2/EDNRA/ADRA1B/PTGS2/F2R/F11R/P2RX4	19
BP	GO:0032330	regulation of chondrocyte differentiation	8/1079	49/18862	0.00621766	0.0472404	0.0363078	GREM1/PTHLH/SOX5/NKX3-2/ADAMTS12/SOX9/LTBP3/SMAD7	8
BP	GO:0038066	p38MAPK cascade	8/1079	49/18862	0.00621766	0.0472404	0.0363078	IL1B/ZC3H12A/XDH/PTPN22/EMC10/MAP3K5/DUSP10/MAP2K3	8
BP	GO:0050851	antigen receptor-mediated signaling pathway	30/1079	323/18862	0.00624799	0.047265	0.0363267	PDE4D/ZC3H12A/LPXN/GATA3/PSMB9/PSME2/PTPN22/ICOSLG/PSMB5/TNFRSF21/KCNN4/PSME1/PSMB10/NFATC2/GPS2/PSMB8/PSMC6/PSMA6/PIK3CD/LGALS3/FYB1/LAPTM5/PDE4B/PAK3/LAT2/PSMA7/PSMA1/HLA-A/NFKBIZ/RFTN1	30
BP	GO:0002828	regulation of type 2 immune response	6/1079	30/18862	0.00628172	0.047265	0.0363267	IL6/IL18/CD74/GATA3/ARG2/HLX	6
BP	GO:0034694	response to prostaglandin	6/1079	30/18862	0.00628172	0.047265	0.0363267	AKR1C3/GNG2/PTGER2/SFRP1/PTGER4/TGFBR3	6
BP	GO:0045577	regulation of B cell differentiation	6/1079	30/18862	0.00628172	0.047265	0.0363267	INHBA/MMP14/PPP2R3C/SFRP1/IL7/BAD	6
BP	GO:0050650	chondroitin sulfate proteoglycan biosynthetic process	6/1079	30/18862	0.00628172	0.047265	0.0363267	CYTL1/CSGALNACT1/CHSY3/CHST11/CHST7/DSE	6
BP	GO:0150117	positive regulation of cell-substrate junction organization	6/1079	30/18862	0.00628172	0.047265	0.0363267	COL16A1/NRP1/KDR/FMN1/ARF6/SFRP1	6
BP	GO:2000406	positive regulation of T cell migration	6/1079	30/18862	0.00628172	0.047265	0.0363267	WNT5A/CXCL12/SPN/ADAM8/FADD/TMEM102	6
BP	GO:0061387	regulation of extent of cell growth	13/1079	104/18862	0.00634396	0.0476674	0.036636	NRCAM/ISLR2/MAP2/WNT5A/CXCL12/SEMA7A/CRABP2/LPAR3/APOE/NRP1/SEMA6A/TWF2/NKX6-1	13
BP	GO:0035148	tube formation	16/1079	140/18862	0.00636758	0.047713	0.036671	GREM1/PAX8/TGM2/WNT5A/CTHRC1/GATA3/GDNF/VANGL2/SPINT2/NOG/TCAP/SFRP1/PIK3CD/SOX9/FGF2/SPINT1	16
BP	GO:0061008	hepaticobiliary system development	16/1079	140/18862	0.00636758	0.047713	0.036671	IL6/ASS1/ITGA2/CEBPB/TNFAIP3/QDPR/ARF6/SOX9/CLDN1/PRMT5/HMGCS1/GNPNAT1/TAF10/HES1/HLX/TGFBR3	16
BP	GO:0032409	regulation of transporter activity	27/1079	283/18862	0.00648869	0.0485536	0.0373171	EHD3/PTK2B/JPH4/NETO1/CNIH3/MMP9/RASGRF1/CTSS/PDE4D/P2RY6/RRAD/CLIC2/CCL2/CACNG7/ADRB2/PDE4B/RANGRF/ANK3/PINK1/FKBP1A/SNCA/DMD/CAB39/RGS9/PPIF/PARK7/NETO2	27
BP	GO:0006469	negative regulation of protein kinase activity	24/1079	243/18862	0.00654738	0.0489254	0.0376029	TRIB2/IL1B/DUSP4/DUSP6/SOCS1/PTPN22/APOE/TRIB1/DUSP5/TNFAIP3/GPS2/SPRY4/SFRP1/SPRY2/PKIA/SH2B3/DUSP10/SNX6/SNCA/RTRAF/MVP/RGS14/PARK7/HYAL2	24
BP	GO:0015718	monocarboxylic acid transport	19/1079	178/18862	0.00656869	0.0490174	0.0376736	PTGES/IL1B/STRA6/SNAP25/SLC1A3/ABCC3/PLA2G4A/ADORA1/STX1A/GLS/SLC22A3/RAB3A/LRRC8C/SYT1/TSPOAP1/CLN8/MPC2/SLC26A6/P2RX4	19
BP	GO:0007160	cell-matrix adhesion	23/1079	230/18862	0.0066222	0.049349	0.0379284	GREM1/PTK2B/COL16A1/PLAU/ITGA11/COL17A1/MMP14/ITGA2/THBS1/ITGA1/NRP1/ITGA7/KDR/FMN1/ADAMTS12/SFRP1/JUP/RRAS/AJUBA/ADAM15/PTPRK/ITGB5/CD63	23
BP	GO:0032310	prostaglandin secretion	4/1079	14/18862	0.00671498	0.0495651	0.0380946	PTGES/IL1B/PLA2G4A/P2RX4	4
BP	GO:0045217	cell-cell junction maintenance	4/1079	14/18862	0.00671498	0.0495651	0.0380946	F2RL1/INAVA/CSF1R/F2R	4
BP	GO:0045651	positive regulation of macrophage differentiation	4/1079	14/18862	0.00671498	0.0495651	0.0380946	TRIB1/FADD/LIF/CASP8	4
BP	GO:0051917	regulation of fibrinolysis	4/1079	14/18862	0.00671498	0.0495651	0.0380946	SERPINF2/THBS1/FAP/USF1	4
BP	GO:0070071	proton-transporting two-sector ATPase complex assembly	4/1079	14/18862	0.00671498	0.0495651	0.0380946	OXA1L/PIP4P1/TMEM9/TMEM70	4
BP	GO:0070141	response to UV-A	4/1079	14/18862	0.00671498	0.0495651	0.0380946	MMP9/OPN3/TIMP1/MMP2	4
BP	GO:0072672	neutrophil extravasation	4/1079	14/18862	0.00671498	0.0495651	0.0380946	PECAM1/ADAM8/IL1R1/PIK3CD	4
BP	GO:0031667	response to nutrient levels	39/1079	451/18862	0.00676179	0.0498217	0.0382918	AKR1C3/KYNU/RARRES2/LIPG/GIP/MMP7/VDR/CYP26B1/STC1/UCN2/ZC3H12A/ASS1/ITGA2/SOD2/TNFRSF11B/AQP3/APOE/SSTR2/DAD1/VGF/ATP2B1/SLC22A3/PCSK1N/MAP3K5/ADRB2/TGFBR2/NQO1/SFRP1/MFSD2A/PMAIP1/HMGCS1/RNF152/GCLM/IL15/FADS1/USF1/PHEX/ZNF354A/EIF2S1	39
BP	GO:0032412	regulation of ion transmembrane transporter activity	25/1079	257/18862	0.00676806	0.0498217	0.0382918	EHD3/PTK2B/JPH4/NETO1/CNIH3/MMP9/RASGRF1/CTSS/PDE4D/P2RY6/RRAD/CLIC2/CCL2/CACNG7/ADRB2/PDE4B/RANGRF/ANK3/PINK1/FKBP1A/DMD/CAB39/RGS9/PPIF/NETO2	25
CC	GO:0062023	collagen-containing extracellular matrix	54/1121	423/19520	3.00448e-08	1.79067e-05	1.68251e-05	LUM/RARRES2/SRPX/COL15A1/SERPINF2/GREM1/ANXA8/TIMP3/MMP9/COL24A1/COL16A1/S100A4/CTSS/LAMC2/TGM2/COL4A6/WNT5A/CTHRC1/ANGPTL4/CXCL12/SEMA7A/LAMB3/COL17A1/S100A6/COL7A1/COL8A2/TIMP1/THBS1/SRPX2/COL6A3/ZP3/APOE/MMP2/MFAP2/ATRNL1/LTBP2/SFRP1/LGALS3/TINAGL1/IL7/LAMA5/LTBP1/SERPINE2/LAMB1/IGFBP7/PCOLCE/LAMA1/LTBP3/CD151/SERPINB8/ADAMTS3/ANXA6/SDC3/CSTB	54
CC	GO:0005788	endoplasmic reticulum lumen	36/1121	306/19520	3.59476e-05	0.00963883	0.00905662	C3/COL15A1/IL6/GIP/COL24A1/COL16A1/COL4A6/WNT5A/COL17A1/AFP/COL7A1/COL8A2/ARSI/TIMP1/TMEM132A/THBS1/EBI3/COL6A3/APOE/APOL1/VGF/IGFBP4/P4HA2/MXRA8/PDGFC/WNT7B/MANF/PTGS2/LTBP1/LAMB1/FAM20C/IGFBP7/SDF2L1/ERO1A/ERP29/FKBP10	36
CC	GO:1904724	tertiary granule lumen	12/1121	55/19520	5.34298e-05	0.00963883	0.00905662	PRSS3/CXCL1/OSCAR/MMP9/CTSS/PTX3/CDA/FTH1/QPCT/GGH/IDH1/CSTB	12
CC	GO:0070820	tertiary granule	23/1121	164/19520	6.5155e-05	0.00963883	0.00905662	PRSS3/TRPM2/SNAP25/CXCL1/SERPINB10/OSCAR/MMP9/PLAU/CTSS/PTX3/ITGAM/CDA/FTH1/ADAM8/OLR1/QPCT/LGALS3/GGH/IDH1/ATAD3B/CYBA/CD58/CSTB	23
CC	GO:0005839	proteasome core complex	7/1121	20/19520	8.08627e-05	0.00963883	0.00905662	PSMB9/PSMB5/PSMB10/PSMB8/PSMA6/PSMA7/PSMA1	7
CC	GO:0043256	laminin complex	5/1121	12/19520	0.000349059	0.0346732	0.0325789	LAMC2/LAMB3/LAMA5/LAMB1/LAMA1	5
CC	GO:1905369	endopeptidase complex	12/1121	68/19520	0.000445469	0.0379285	0.0356376	PSMB9/PSME2/PSMB5/PSME1/PSMB10/PSMB8/PSMC6/PSMA6/PSMA7/PSMA1/DNAJB2/HTRA2	12
CC	GO:0005911	cell-cell junction	46/1121	485/19520	0.000589771	0.0439379	0.041284	DPP4/PECAM1/CADM3/PCDH1/CLDN16/AKR1B1/CLDN3/SH3BP1/PLPP3/SHROOM2/STEAP1/COL17A1/PDLIM4/PTPRU/AQP3/RAB13/PARD6B/VANGL2/CLDN14/NDRG1/FGFR4/FMN1/VAMP5/CLDN23/CDH24/PDZD2/CLDN1/JCAD/SH3KBP1/RANGRF/MXRA8/ANK3/PDLIM3/STARD10/JUP/LAMA1/CYTH1/AJUBA/ADAM15/PTPRK/SMAD7/F11R/SAV1/PARK7/TRAF4/CDC42EP4	46
CC	GO:0000502	proteasome complex	11/1121	62/19520	0.000727413	0.0481709	0.0452612	PSMB9/PSME2/PSMB5/PSME1/PSMB10/PSMB8/PSMC6/PSMA6/PSMA7/PSMA1/DNAJB2	11
MF	GO:0005125	cytokine activity	36/1103	235/18337	2.14495e-07	0.00020377	0.000190562	CSF3/CXCL5/CXCL6/CXCL8/TNFSF15/IL1B/INHBA/GREM1/IL6/CXCL1/CSF2/WNT16/CXCL2/IL18/IL24/CXCL3/IL1A/IL11/WNT5A/CXCL12/CCL7/LTB/TIMP1/TNFRSF11B/EBI3/CCL2/TNFSF12/IL7/WNT7B/FGF2/LIF/FAM3C/NAMPT/NRG1/IL15/IL32	36
MF	GO:0019955	cytokine binding	24/1103	136/18337	1.78734e-06	0.000701862	0.000656368	IL18R1/CSF2RA/GREM1/CD74/CSF1R/NRROS/NRP2/THBS1/EBI3/PRLR/IL31RA/NRP1/NOG/TCAP/TRIM16/TGFBR2/IL1R1/NBL1/FGF2/LTBP1/LTBP3/PARK7/TGFBR3/HYAL2	24
MF	GO:0048018	receptor ligand activity	56/1103	486/18337	2.21641e-06	0.000701862	0.000656368	CSF3/CXCL5/DPP4/CXCL6/CXCL8/TNFSF15/IL1B/INHBA/GREM1/IL6/PTHLH/CXCL1/CSF2/WNT16/CXCL2/IL18/GIP/IL24/CXCL3/IL1A/STC1/BTC/IL11/UCN2/WNT5A/CXCL12/SEMA7A/CCL7/FGF17/PGF/LTB/TIMP1/ARTN/TNFRSF11B/EBI3/CCL2/ZP3/GDNF/VGF/TNFSF12/SEMA6A/LGALS3/IL7/PDGFC/WNT7B/NBL1/MANF/FGF2/METRN/LIF/FAM3C/NAMPT/VEGFB/NRG1/IL15/IL32	56
MF	GO:0030546	signaling receptor activator activity	56/1103	492/18337	3.23549e-06	0.000768428	0.000718619	CSF3/CXCL5/DPP4/CXCL6/CXCL8/TNFSF15/IL1B/INHBA/GREM1/IL6/PTHLH/CXCL1/CSF2/WNT16/CXCL2/IL18/GIP/IL24/CXCL3/IL1A/STC1/BTC/IL11/UCN2/WNT5A/CXCL12/SEMA7A/CCL7/FGF17/PGF/LTB/TIMP1/ARTN/TNFRSF11B/EBI3/CCL2/ZP3/GDNF/VGF/TNFSF12/SEMA6A/LGALS3/IL7/PDGFC/WNT7B/NBL1/MANF/FGF2/METRN/LIF/FAM3C/NAMPT/VEGFB/NRG1/IL15/IL32	56
MF	GO:0005126	cytokine receptor binding	36/1103	270/18337	6.07817e-06	0.00115485	0.00108	CSF3/CXCL5/CXCL6/CXCL8/TNFSF15/IL1B/GREM1/IL6/CXCL1/CSF2/CXCL2/IL18/CXCL3/IL1A/IL11/CXCL12/CCL7/GATA3/PGF/LTB/PRLR/CCL2/NES/TNFSF12/TGFBR2/FADD/SH2B3/IL7/LIF/FKBP1A/VEGFB/CASP8/SMAD7/IL15/TRAF4/TGFBR3	36
MF	GO:0061134	peptidase regulator activity	32/1103	230/18337	8.13376e-06	0.00128784	0.00120437	C3/SERPINF2/SERPINB2/CARD16/SERPINB10/TIMP3/SERPINB7/COL7A1/WFDC3/TIMP1/PSME2/COL6A3/HMSD/PSME1/SPINT2/PCSK1N/PSENEN/PRDX5/NKX3-1/PINK1/BIN1/CASP1/SERPINE2/TNFAIP8/SNCA/PCOLCE/SPINT1/APH1B/BAD/SERPINB8/NLRP1/CSTB	32
MF	GO:0005178	integrin binding	23/1103	142/18337	1.28082e-05	0.00173825	0.00162558	IL1B/COL16A1/PLPP3/CXCL12/SEMA7A/ITGAM/MMP14/LCP1/ITGA2/THBS1/KDR/ITGB8/FAP/ISG15/FGF2/LAMA5/LAMB1/ADAM22/ADAM15/ITGB5/NRG1/CD151/F11R	23
MF	GO:0005201	extracellular matrix structural constituent	25/1103	170/18337	3.02407e-05	0.00359108	0.00335831	LUM/SRPX/COL15A1/COL24A1/COL16A1/LAMC2/COL4A6/CTHRC1/LAMB3/COL17A1/COL7A1/COL8A2/THBS1/SRPX2/COL6A3/ZP3/MFAP2/LTBP2/TINAGL1/LAMA5/LTBP1/LAMB1/IGFBP7/PCOLCE/LAMA1	25
MF	GO:0045236	CXCR chemokine receptor binding	7/1103	18/18337	4.94436e-05	0.00521904	0.00488075	CXCL5/CXCL6/CXCL8/CXCL1/CXCL2/CXCL3/CXCL12	7
MF	GO:0061135	endopeptidase regulator activity	26/1103	192/18337	8.81931e-05	0.00837834	0.00783526	C3/SERPINF2/SERPINB2/CARD16/SERPINB10/TIMP3/SERPINB7/COL7A1/WFDC3/TIMP1/PSME2/COL6A3/HMSD/PSME1/SPINT2/PCSK1N/PSENEN/PRDX5/BIN1/SERPINE2/TNFAIP8/SNCA/SPINT1/APH1B/SERPINB8/CSTB	26
MF	GO:0016209	antioxidant activity	15/1103	86/18337	0.000171993	0.0145989	0.0136526	PTGS1/PTGES/ALOX5AP/GPX3/SOD2/CLIC2/APOE/NQO1/PRDX5/TXNDC17/PTGS2/PRXL2A/MGST3/PARK7/PRXL2B	15
MF	GO:0016504	peptidase activator activity	10/1103	43/18337	0.000184408	0.0145989	0.0136526	PSME2/PSME1/PSENEN/NKX3-1/PINK1/CASP1/PCOLCE/APH1B/BAD/NLRP1	10
MF	GO:0019838	growth factor binding	20/1103	137/18337	0.000201827	0.0147489	0.0137929	FLT1/HTRA3/NRROS/NRP2/THBS1/SRPX2/NRP1/KDR/FGFR4/IGFBP4/LTBP2/TRIM16/TGFBR2/IL1R1/LTBP1/IGFBP7/LTBP3/IGFBP6/TGFBR3/HYAL2	20
MF	GO:0050431	transforming growth factor beta binding	7/1103	24/18337	0.000391068	0.0265367	0.0248166	NRROS/THBS1/TGFBR2/LTBP1/LTBP3/TGFBR3/HYAL2	7
MF	GO:0008083	growth factor activity	21/1103	162/18337	0.000728979	0.0460257	0.0430424	CSF3/INHBA/IL6/CXCL1/CSF2/BTC/IL11/CXCL12/FGF17/PGF/TIMP1/ARTN/GDNF/VGF/IL7/PDGFC/MANF/FGF2/LIF/VEGFB/NRG1	21
MF	GO:0070851	growth factor receptor binding	19/1103	141/18337	0.000796926	0.0460257	0.0430424	CSF3/IL1B/GREM1/IL6/CSF2/IL1A/BTC/IL11/GATA3/FGF17/PGF/ARTN/GDNF/IL1R1/IL7/PDGFC/FGF2/VEGFB/ERN1	19
MF	GO:0008201	heparin binding	21/1103	164/18337	0.000856418	0.0460257	0.0430424	TENM1/CXCL6/LIPG/MMP7/LAMC2/CCL7/PGF/NRP2/THBS1/APOE/NRP1/FGFR4/LTBP2/SFRP1/FGF2/SERPINE2/PCOLCE/PDCD5/VEGFB/ADAMTS3/TGFBR3	21
MF	GO:0031681	G-protein beta-subunit binding	6/1103	20/18337	0.000872067	0.0460257	0.0430424	F2RL1/GNGT2/GNG2/GNG11/GNG4/F2R	6

## Sheet: S3
Supplementary Table S3. Enriched functional annnotation terms associated with significantly down-regulated genes in KO 0h vs WT 0h.
ONTOLOGY	ID	Description	GeneRatio	BgRatio	pvalue	p.adjust	qvalue	geneID	Count
BP	GO:0034329	cell junction assembly	48/854	425/18862	5.44462e-09	1.42388e-05	1.29473e-05	CDH11/LGI2/CDH6/CDH10/ERBB4/EPHB3/OXTR/PCDHB11/RHOD/CAMSAP3/JAM3/SLITRK3/ADGRL3/RAMP2/CDH18/KIRREL3/LRFN1/DMTN/SLITRK5/NLGN1/BDNF/TLN2/PCDHB10/PCDHB14/MPP7/PTPRS/PCDHB9/OPHN1/BCAS3/DLG1/HEG1/AMIGO1/WDPCP/SEMA4D/PAK2/PLXNB1/LIMS2/THSD1/ECT2/PRKCI/PIP5K1C/LIMCH1/TSC1/PCLO/PCDHB16/PRKCA/PRKACA/ABL1	48
BP	GO:0050808	synapse organization	47/854	412/18862	5.71955e-09	1.42388e-05	1.29473e-05	PPFIA4/SLC8A2/LGI2/ERBB4/EPHB3/OXTR/NGEF/PCDHB11/MAPT/NFASC/CAMK2B/WASF3/SEMA3E/SLITRK3/ADGRL3/ELFN1/KIRREL3/LRFN1/EPHA4/SLITRK5/NLGN1/DLGAP3/BDNF/INSR/PCDHB10/PCDHB14/ADGRL1/KALRN/PTPRS/PCDHB9/OPHN1/DLG1/AMIGO1/SEMA4D/DKK1/UNC13B/PLXNB1/SPARC/ACTBL2/TSC1/SLC7A11/PCLO/DAB2IP/PCDHB16/PALM/CNKSR2/ABL1	47
BP	GO:0007409	axonogenesis	49/854	460/18862	2.52201e-08	4.1857e-05	3.80603e-05	CDH11/GFRA1/EPHA5/EPHB3/NPTX1/LHX9/MAPT/NFASC/SEMA3E/SLITRK3/VLDLR/NRXN3/RTN4R/NDN/ZSWIM4/BRSK2/EPHA4/SLITRK5/EFNA2/BDNF/ATP8A2/SLIT3/NFIB/KALRN/PTPRS/PTCH1/NOTCH1/KLF7/OPHN1/NGF/SEMA6B/AMIGO1/SEMA4D/MAP3K13/NTN4/NRTN/PAK2/SMO/PIK3CB/PLXNB1/MYPN/RAB8A/ACTBL2/ADARB1/PSPN/PIK3CA/PRKCA/ABL1/DNM2	49
BP	GO:0031589	cell-substrate adhesion	38/854	359/18862	1.09739e-06	0.00126643	0.00115155	FBLN1/FBLN2/CDH13/POSTN/FBLN5/ECM2/EPHB3/CCL28/RHOD/CAMSAP3/MELTF/JAM3/SEMA3E/ACER2/MSLN/CCDC80/RADIL/DMTN/SMAD6/TMEFF2/PRKX/TMEM8B/ONECUT2/NOTCH1/BCL6/BCAS3/WDPCP/NTN4/PIK3CB/LIMS2/THSD1/LIMCH1/TSC1/CSPG5/BCAM/STK4/ABL1/DNM2	38
BP	GO:0051056	regulation of small GTPase mediated signal transduction	35/854	319/18862	1.27177e-06	0.00126643	0.00115155	NGEF/RHOD/SPRY1/RASGRP1/RTN4R/ARHGAP20/SCAI/OBSCN/ARHGEF9/KALRN/NOTCH1/BCL6/ARHGEF5/DENND4C/OPHN1/RALGPS1/NGF/GARNL3/ERBIN/RAP1GAP2/KITLG/HEG1/RABL3/DENND4A/PIK3CB/ARHGEF18/ECT2/OCRL/SYDE2/DAB2IP/DENND1A/CYTH3/LPAR1/ABL1/DNM2	35
BP	GO:0016339	calcium-dependent cell-cell adhesion via plasma membrane cell adhesion molecules	11/854	43/18862	2.33532e-06	0.00193793	0.00176214	CDH13/CDH11/CDH6/CDH10/PCDHB11/CDH18/NLGN1/PCDHB10/PCDHB14/PCDHB9/PCDHB16	11
BP	GO:0097485	neuron projection guidance	31/854	278/18862	3.63877e-06	0.0025882	0.00235343	DPYSL4/GFRA1/EPHA5/EPHB3/LHX9/NFASC/SEMA3E/VLDLR/NRXN3/ZSWIM4/EPHA4/EFNA2/BDNF/SLIT3/NFIB/KALRN/PTCH1/NOTCH1/KLF7/OPHN1/SEMA6B/SEMA4D/NTN4/NRTN/SMO/PIK3CB/PLXNB1/MYPN/PSPN/PIK3CA/PRKCA	31
BP	GO:0007156	homophilic cell adhesion via plasma membrane adhesion molecules	22/854	167/18862	6.74242e-06	0.00419632	0.00381568	CDH13/CDH11/PCDHGA9/CDH6/CDH10/CEACAM1/PCDHB11/PCDHGB6/PCDHGB2/CDH18/PCDH10/PCDHGB7/KIRREL3/PCDHGA6/PCDHB12/FAT3/PCDHB10/PCDHB14/PCDHB9/AMIGO1/MYPN/PCDHB16	22
BP	GO:0007411	axon guidance	30/854	277/18862	9.31363e-06	0.00515251	0.00468514	GFRA1/EPHA5/EPHB3/LHX9/NFASC/SEMA3E/VLDLR/NRXN3/ZSWIM4/EPHA4/EFNA2/BDNF/SLIT3/NFIB/KALRN/PTCH1/NOTCH1/KLF7/OPHN1/SEMA6B/SEMA4D/NTN4/NRTN/SMO/PIK3CB/PLXNB1/MYPN/PSPN/PIK3CA/PRKCA	30
BP	GO:0046578	regulation of Ras protein signal transduction	23/854	190/18862	1.72338e-05	0.00801711	0.0072899	SPRY1/RASGRP1/RTN4R/SCAI/NOTCH1/BCL6/DENND4C/OPHN1/RALGPS1/NGF/ERBIN/KITLG/HEG1/RABL3/DENND4A/PIK3CB/ARHGEF18/DAB2IP/DENND1A/CYTH3/LPAR1/ABL1/DNM2	23
BP	GO:0098742	cell-cell adhesion via plasma-membrane adhesion molecules	29/854	273/18862	1.88615e-05	0.00801711	0.0072899	CDH13/CDH11/PCDHGA9/CDH6/CDH10/CEACAM1/PCDHB11/PCDHGB6/SLITRK3/ADGRL3/PCDHGB2/MMP24/CDH18/CD177/PCDH10/PCDHGB7/KIRREL3/PCDHGA6/PCDHB12/FAT3/NLGN1/PCDHB10/PCDHB14/ADGRL1/PTPRS/PCDHB9/AMIGO1/MYPN/PCDHB16	29
BP	GO:0010810	regulation of cell-substrate adhesion	25/854	218/18862	1.93222e-05	0.00801711	0.0072899	FBLN1/FBLN2/CDH13/POSTN/ECM2/CCL28/CAMSAP3/MELTF/SEMA3E/ACER2/CCDC80/DMTN/ONECUT2/NOTCH1/BCL6/BCAS3/WDPCP/PIK3CB/LIMS2/LIMCH1/TSC1/CSPG5/STK4/ABL1/DNM2	25
BP	GO:0034332	adherens junction organization	12/854	66/18862	3.54182e-05	0.0134849	0.0122617	CDH13/CDH11/CDH6/CDH10/CAMSAP3/JAM3/RAMP2/CDH18/EPHA4/DSP/PAK2/PIP5K1C	12
BP	GO:0007416	synapse assembly	21/854	173/18862	3.79168e-05	0.0134849	0.0122617	LGI2/ERBB4/EPHB3/OXTR/PCDHB11/SLITRK3/ADGRL3/KIRREL3/LRFN1/SLITRK5/NLGN1/BDNF/PCDHB10/PCDHB14/PTPRS/PCDHB9/AMIGO1/SEMA4D/PLXNB1/PCLO/PCDHB16	21
BP	GO:0007517	muscle organ development	31/854	317/18862	4.95031e-05	0.0164317	0.0149412	NUPR1/TTN/MYH14/ERBB3/MYH3/BMP4/ATF3/LOX/ANKRD1/BTG2/LEF1/MKX/LARGE1/GPCPD1/DSP/FOXC1/ARID5B/NOTCH1/MYLK/COL11A1/S1PR1/HEG1/FKTN/EEF2/FXR1/SMO/RPS6KB1/ADARB1/MRTFB/POU6F1/TAGLN	31
BP	GO:0045216	cell-cell junction organization	23/854	209/18862	7.80913e-05	0.024301	0.0220968	CDH13/CDH11/CDH6/CDH10/CAMSAP3/JAM3/RAMP2/CDH18/CD177/EPHA4/GRHL1/TLN2/DSP/MPP7/DLG1/HEG1/PAK2/LIMS2/ECT2/PRKCI/PIP5K1C/PRKCA/PRKACA	23
BP	GO:0043087	regulation of GTPase activity	41/854	487/18862	0.000105636	0.0309389	0.0281325	GRHL3/EPHA5/EPHB3/STXBP5L/NGEF/TBC1D30/RGS4/SPRY1/RGS7/RASGRP1/RTN4R/TBC1D2/EPHA4/ARHGAP20/GRTP1/LLGL2/EVI5L/KALRN/BCL6/ARHGEF5/RGS11/OPHN1/BCAS3/GARNL3/RAP1GAP2/GAPVD1/S1PR1/DVL3/GPSM1/SEMA4D/RABGAP1/PLXNB1/ECT2/OCRL/TSC1/APC2/SYDE2/DAB2IP/DENND1A/ACAP2/ANKRD27	41
BP	GO:0048638	regulation of developmental growth	30/854	319/18862	0.00013179	0.0349099	0.0317433	ERBB4/MAPT/RGS4/SEMA3E/PLAC8/RTN4R/BMP4/FGFR3/STAT5A/BDNF/ATP8A2/INSR/FOXC1/PTPRS/PTCH1/NOTCH1/EDN1/NGF/SEMA6B/STAT5B/SEMA4D/MAP3K13/SMO/RPS6KB1/TBX2/PIK3CA/STK4/ABL1/DNM2/WWC2	30
BP	GO:0021537	telencephalon development	24/854	231/18862	0.000136012	0.0349099	0.0317433	EPHA5/ERBB4/EPHB3/OXTR/RTN4R/KIRREL3/FOXP2/BMP4/SLITRK5/BTG2/LEF1/EFNA2/SYNE2/NFIB/PTPRS/EZH1/AGTPBP1/BNIP3/SMO/TSC1/SLC7A11/DAB2IP/SIX3/LPAR1	24
BP	GO:0022604	regulation of cell morphogenesis	29/854	305/18862	0.000140228	0.0349099	0.0317433	FBLN1/POSTN/RHOD/MELTF/CAMK2B/WASF3/SEMA3E/MYH14/DMTN/EPHA4/COCH/KALRN/DLG1/DVL3/WDPCP/SEMA4D/MAP3K13/ARHGEF18/PLXNB1/LIMS2/SPARC/CSPG5/TBCCD1/GRIP1/PALM/LPAR1/ABL1/ANKRD27/DNM2	29
BP	GO:0031032	actomyosin structure organization	21/854	191/18862	0.00015941	0.0377953	0.034367	TTN/LMOD1/MYH14/KRT19/MYH3/TMEFF2/PPM1E/ANKRD1/OBSCN/ARHGEF5/EDN1/EPB41L2/S1PR1/PAK2/ARHGEF18/MYPN/ECT2/LIMCH1/TSC1/LPAR1/ABL1	21
BP	GO:0060271	cilium assembly	34/854	388/18862	0.000190731	0.0431658	0.0392503	IFT172/TBC1D30/SAXO1/DCDC2/ABLIM1/NME5/DNAH1/MNS1/TTLL3/CFAP46/ONECUT2/SYNE2/IQCB1/EVI5L/NOTCH1/KIF27/CNTRL/CFAP44/WDPCP/DZIP1L/ODF2/KIF24/OCRL/RAB8A/CEP70/CEP152/CDK5RAP2/DYNC2H1/CDC14B/CEP164/PRKACA/CCDC40/DNM2/CEP78	34
BP	GO:0090630	activation of GTPase activity	15/854	116/18862	0.000235064	0.0493085	0.0448358	NGEF/TBC1D30/RASGRP1/TBC1D2/GRTP1/EVI5L/ARHGEF5/BCAS3/GARNL3/RAP1GAP2/RABGAP1/ECT2/TSC1/APC2/SYDE2	15
BP	GO:0044782	cilium organization	35/854	409/18862	0.000243165	0.0493085	0.0448358	IFT172/TBC1D30/SAXO1/TUB/DCDC2/ABLIM1/NME5/DNAH1/MNS1/TTLL3/CFAP46/ONECUT2/SYNE2/IQCB1/EVI5L/NOTCH1/KIF27/CNTRL/CFAP44/WDPCP/DZIP1L/ODF2/KIF24/OCRL/RAB8A/CEP70/CEP152/CDK5RAP2/DYNC2H1/CDC14B/CEP164/PRKACA/CCDC40/DNM2/CEP78	35
BP	GO:0048745	smooth muscle tissue development	6/854	21/18862	0.000255766	0.0493085	0.0448358	BMP4/PTCH1/MYLK/DLG1/SMO/TIPARP	6
BP	GO:0043547	positive regulation of GTPase activity	35/854	411/18862	0.000266624	0.0493085	0.0448358	GRHL3/STXBP5L/NGEF/TBC1D30/RGS4/RGS7/RASGRP1/RTN4R/TBC1D2/ARHGAP20/GRTP1/LLGL2/EVI5L/KALRN/ARHGEF5/RGS11/OPHN1/BCAS3/GARNL3/RAP1GAP2/GAPVD1/S1PR1/DVL3/SEMA4D/RABGAP1/PLXNB1/ECT2/OCRL/TSC1/APC2/SYDE2/DAB2IP/DENND1A/ACAP2/ANKRD27	35
BP	GO:0090715	immunological memory formation process	5/854	14/18862	0.000267389	0.0493085	0.0448358	TNFSF4/ST3GAL1/HLA-DRA/BCL6/TSC1	5
CC	GO:0032279	asymmetric synapse	33/880	318/19520	7.76186e-06	0.00231268	0.00215421	SLC8A2/ERBB4/INSYN1/SLITRK3/LRFN1/LRRC7/DMTN/EPHA4/NLGN1/DLGAP3/MAPK8IP2/SLC6A9/ITPR1/SLC1A1/ARHGEF9/ADGRL1/DNAJC6/PTPRS/TNIK/PTCH1/DNM1/DLG1/BNIP3/PLCB4/FXR1/PAK2/RAB8A/TSC1/PCLO/GRIP1/PALM/CNKSR2/DNM2	33
CC	GO:0014069	postsynaptic density	32/880	313/19520	1.4385e-05	0.00231268	0.00215421	SLC8A2/ERBB4/INSYN1/SLITRK3/LRFN1/LRRC7/DMTN/EPHA4/NLGN1/DLGAP3/MAPK8IP2/SLC6A9/ITPR1/ARHGEF9/ADGRL1/DNAJC6/PTPRS/TNIK/PTCH1/DNM1/DLG1/BNIP3/PLCB4/FXR1/PAK2/RAB8A/TSC1/PCLO/GRIP1/PALM/CNKSR2/DNM2	32
CC	GO:0005930	axoneme	18/880	128/19520	1.76004e-05	0.00231268	0.00215421	IFT172/CAMSAP3/DNAH11/SAXO1/AK8/DCDC2/SAXO2/DNAH1/MNS1/TTLL3/CFAP46/SPATA7/WDPCP/DZIP1L/PIK3R4/DYNC2H1/PRKACA/CCDC40	18
CC	GO:0099572	postsynaptic specialization	33/880	333/19520	2.02012e-05	0.00231268	0.00215421	SLC8A2/CDH10/ERBB4/INSYN1/SLITRK3/LRFN1/LRRC7/DMTN/EPHA4/NLGN1/DLGAP3/MAPK8IP2/SLC6A9/ITPR1/ARHGEF9/ADGRL1/DNAJC6/PTPRS/TNIK/PTCH1/DNM1/DLG1/BNIP3/PLCB4/FXR1/PAK2/RAB8A/TSC1/PCLO/GRIP1/PALM/CNKSR2/DNM2	33
CC	GO:0097014	ciliary plasm	18/880	130/19520	2.18177e-05	0.00231268	0.00215421	IFT172/CAMSAP3/DNAH11/SAXO1/AK8/DCDC2/SAXO2/DNAH1/MNS1/TTLL3/CFAP46/SPATA7/WDPCP/DZIP1L/PIK3R4/DYNC2H1/PRKACA/CCDC40	18
CC	GO:0098984	neuron to neuron synapse	33/880	342/19520	3.45986e-05	0.00305621	0.0028468	SLC8A2/ERBB4/INSYN1/SLITRK3/LRFN1/LRRC7/DMTN/EPHA4/NLGN1/DLGAP3/MAPK8IP2/SLC6A9/ITPR1/SLC1A1/ARHGEF9/ADGRL1/DNAJC6/PTPRS/TNIK/PTCH1/DNM1/DLG1/BNIP3/PLCB4/FXR1/PAK2/RAB8A/TSC1/PCLO/GRIP1/PALM/CNKSR2/DNM2	33
CC	GO:0098978	glutamatergic synapse	30/880	308/19520	6.52032e-05	0.00493682	0.00459854	CDH11/NSG1/CDH10/ERBB4/NPTX1/ADAM23/WASF3/ADGRL3/EPHA4/NLGN1/APBA1/DLGAP3/PTPRS/TNIK/HIP1/OPHN1/ERBIN/DLG1/PLCB4/FXR1/PAK2/PRKCI/SPARC/RAB8A/ACTBL2/PCLO/CSPG5/GRIP1/CNKSR2/DNM2	30
CC	GO:0099568	cytoplasmic region	26/880	258/19520	0.000112866	0.00747737	0.00696502	IFT172/MAPT/CAMSAP3/DNAH11/MGARP/SAXO1/AK8/DCDC2/SAXO2/DNAH1/MNS1/TTLL3/RIMS3/CFAP46/SPATA7/MYO5B/EPB41L2/WDPCP/UNC13B/DZIP1L/AP3M1/PCLO/PIK3R4/DYNC2H1/PRKACA/CCDC40	26
CC	GO:0032838	plasma membrane bounded cell projection cytoplasm	21/880	216/19520	0.000794839	0.0468072	0.0436	IFT172/MAPT/CAMSAP3/DNAH11/MGARP/SAXO1/AK8/DCDC2/SAXO2/DNAH1/MNS1/TTLL3/CFAP46/SPATA7/WDPCP/DZIP1L/AP3M1/PIK3R4/DYNC2H1/PRKACA/CCDC40	21

## Sheet: S4
Supplementary Table S4. Enriched functional annnotation terms associated with significantly up-regulated genes in WT 12h vs WT 0h.
ONTOLOGY	ID	Description	GeneRatio	BgRatio	pvalue	p.adjust	qvalue	geneID	Count
BP	GO:0051056	regulation of small GTPase mediated signal transduction	54/1293	319/18862	5.56006e-10	2.4924e-06	2.14364e-06	F2RL1/PSD4/F2R/SIPA1L2/RHOF/NTRK1/GPR4/RALGAPA1/ARHGAP5/NRP1/TIAM1/RASGRF1/PSD3/PLEKHG2/ARAP1/FGD4/PREX1/SIPA1L1/ARHGEF10/AKAP13/ARHGEF11/ARFGEF3/SPRY3/EPS8L2/SOS2/ROBO1/DENND4B/SOS1/ARAP3/ARHGAP18/RAC2/SIPA1/ARHGAP24/SRGAP1/PLCE1/OPHN1/STARD13/ARHGAP26/ARFGEF1/ARHGAP29/ARHGAP32/GBF1/ITSN1/ARHGEF19/NOTCH2/PRAG1/FAM13A/DENND3/ARHGAP42/CYTH1/FAM13B/ARHGEF12/MYO9A/JAK2	54
BP	GO:0043087	regulation of GTPase activity	71/1293	487/18862	1.13457e-09	2.4924e-06	2.14364e-06	F2RL1/PTK2B/RGS17/RGPD5/F2R/SIPA1L2/WNT5A/DOCK4/NTRK1/RINL/GRHL3/RALGAPA1/DOCK9/CHML/ARHGAP5/NRP1/TIAM1/DEPDC5/RASGRF1/STXBP5/ARAP1/RAPGEF3/DOCK10/FGD4/PREX1/SEC23A/SIPA1L1/ARHGEF10/AGAP1/ASAP3/ARHGEF11/ALS2CL/PLXNA2/TBC1D8B/SOS1/GIT2/ADPRH/RTKN/SNX13/ARAP3/ARHGAP18/NF1/TRAPPC6B/SIPA1/ARHGAP24/SRGAP1/DOCK5/OPHN1/TBC1D19/STARD13/ARHGAP26/ARFGEF1/SFRP1/DENND1B/ARHGAP29/ARHGAP32/PLXNB3/RASAL2/CBLB/T…	71
BP	GO:0043547	positive regulation of GTPase activity	63/1293	411/18862	1.34627e-09	2.4924e-06	2.14364e-06	F2RL1/PTK2B/RGS17/RGPD5/F2R/SIPA1L2/WNT5A/DOCK4/NTRK1/RINL/GRHL3/RALGAPA1/DOCK9/CHML/ARHGAP5/NRP1/TIAM1/DEPDC5/RASGRF1/STXBP5/ARAP1/RAPGEF3/DOCK10/PREX1/SEC23A/SIPA1L1/ARHGEF10/AGAP1/ASAP3/ARHGEF11/ALS2CL/TBC1D8B/SOS1/GIT2/ADPRH/SNX13/ARAP3/ARHGAP18/NF1/SIPA1/ARHGAP24/SRGAP1/DOCK5/OPHN1/TBC1D19/STARD13/ARHGAP26/ARFGEF1/SFRP1/DENND1B/ARHGAP29/ARHGAP32/RASAL2/TBC1D7/ARHGEF19/FAM13A/ARHGAP42/FAM13B/…	63
BP	GO:0007409	axonogenesis	67/1293	460/18862	3.4925e-09	4.84934e-06	4.17078e-06	NRCAM/PRKCQ/SLITRK4/ISLR2/WNT5A/LPAR3/ACTBL2/LAMC2/NTRK1/FEZ1/CXCL12/ATL1/DPYSL5/NIN/SEMA6A/CRMP1/LAMA1/MAP6/MAP1A/NRP1/TIAM1/LAMA5/LRP4/B4GALT6/SEMA3F/KIF5C/SH3KBP1/LRP1/NOTCH3/ANK3/PARD6B/MYCBP2/SIPA1L1/ZDHHC17/SEMA7A/DIP2B/SEMA3B/SPTBN1/PLXNA2/MEGF8/ROBO1/SOS1/MACF1/SZT2/ITGA4/RAC2/FZD3/ZSWIM5/NGFR/PIK3CD/CRABP2/OPHN1/PLCG1/DOK4/SPG11/PTPRM/BCL2/CSF1R/PLXNB3/SPTBN2/NUMB/NOTCH2/SEMA3D/SPAST/LHX…	67
BP	GO:0045229	external encapsulating structure organization	57/1293	396/18862	7.83683e-08	8.70516e-05	7.48706e-05	LUM/DPP4/CTSS/GREM1/TIE1/ITGA11/KDR/MMP9/CSGALNACT1/MPZL3/COL4A5/MMP16/THBS1/LAMC2/OLFML2A/COL7A1/SH3PXD2A/ITGA1/LAMB3/MMP14/LAMA1/COL4A6/ITGB3/LAMA5/COL8A2/ADAMTS12/ITGA2/COL9A3/MMP2/VCAN/ADAMTS15/ADAM19/ERO1A/LCP1/SCUBE3/SULF2/COL6A3/LRP1/ATP7A/FGF2/TIMP1/TNFRSF11B/COL17A1/COL16A1/FAP/EMILIN1/IL6/NF1/ITGA4/FBN2/HAS2/DDR1/TGM1/PAPLN/LAMC1/FURIN/PDGFA	57
BP	GO:0030198	extracellular matrix organization	56/1293	393/18862	1.43615e-07	0.000124196	0.000106817	LUM/DPP4/CTSS/GREM1/TIE1/ITGA11/KDR/MMP9/CSGALNACT1/MPZL3/COL4A5/MMP16/THBS1/LAMC2/OLFML2A/COL7A1/SH3PXD2A/ITGA1/LAMB3/MMP14/LAMA1/COL4A6/ITGB3/LAMA5/COL8A2/ADAMTS12/ITGA2/COL9A3/MMP2/VCAN/ADAMTS15/ADAM19/ERO1A/LCP1/SCUBE3/SULF2/COL6A3/LRP1/ATP7A/FGF2/TIMP1/TNFRSF11B/COL17A1/COL16A1/FAP/EMILIN1/IL6/NF1/ITGA4/FBN2/HAS2/DDR1/PAPLN/LAMC1/FURIN/PDGFA	56
BP	GO:0043062	extracellular structure organization	56/1293	394/18862	1.5653e-07	0.000124196	0.000106817	LUM/DPP4/CTSS/GREM1/TIE1/ITGA11/KDR/MMP9/CSGALNACT1/MPZL3/COL4A5/MMP16/THBS1/LAMC2/OLFML2A/COL7A1/SH3PXD2A/ITGA1/LAMB3/MMP14/LAMA1/COL4A6/ITGB3/LAMA5/COL8A2/ADAMTS12/ITGA2/COL9A3/MMP2/VCAN/ADAMTS15/ADAM19/ERO1A/LCP1/SCUBE3/SULF2/COL6A3/LRP1/ATP7A/FGF2/TIMP1/TNFRSF11B/COL17A1/COL16A1/FAP/EMILIN1/IL6/NF1/ITGA4/FBN2/HAS2/DDR1/PAPLN/LAMC1/FURIN/PDGFA	56
BP	GO:0007044	cell-substrate junction assembly	22/1293	100/18862	8.59401e-07	0.000596639	0.000513153	PTK2B/GREM1/KDR/THBS1/LAMC2/LAMB3/MMP14/NRP1/FMN1/ITGA2/LRP1/DST/COL17A1/COL16A1/MACF1/PTPRK/SORBS1/SFRP1/BCL2/LAMC1/EPB41L5/FERMT2	22
BP	GO:0007411	axon guidance	42/1293	277/18862	1.00237e-06	0.000613289	0.000527473	NRCAM/PRKCQ/WNT5A/LAMC2/NTRK1/FEZ1/CXCL12/DPYSL5/SEMA6A/CRMP1/LAMA1/NRP1/LAMA5/SEMA3F/KIF5C/SH3KBP1/LRP1/NOTCH3/MYCBP2/SEMA7A/SEMA3B/SPTBN1/PLXNA2/MEGF8/ROBO1/SOS1/RAC2/FZD3/ZSWIM5/NGFR/PIK3CD/OPHN1/PLCG1/DOK4/PTPRM/CSF1R/PLXNB3/SPTBN2/NOTCH2/SEMA3D/LHX1/PLXNB2	42
BP	GO:0097485	neuron projection guidance	42/1293	278/18862	1.10423e-06	0.000613289	0.000527473	NRCAM/PRKCQ/WNT5A/LAMC2/NTRK1/FEZ1/CXCL12/DPYSL5/SEMA6A/CRMP1/LAMA1/NRP1/LAMA5/SEMA3F/KIF5C/SH3KBP1/LRP1/NOTCH3/MYCBP2/SEMA7A/SEMA3B/SPTBN1/PLXNA2/MEGF8/ROBO1/SOS1/RAC2/FZD3/ZSWIM5/NGFR/PIK3CD/OPHN1/PLCG1/DOK4/PTPRM/CSF1R/PLXNB3/SPTBN2/NOTCH2/SEMA3D/LHX1/PLXNB2	42
BP	GO:0022604	regulation of cell morphogenesis	44/1293	305/18862	2.20086e-06	0.0010991	0.000945306	PTK2B/KDR/WNT5A/RHOF/NRP1/TIAM1/CACNG7/BRWD3/ARAP1/SH3KBP1/FGD4/CARMIL1/PREX1/RIMS2/PLXNA2/SPRY3/DNMBP/MOV10/MACF1/ARHGAP18/BCL9L/RAC2/ZMYM6/PRKDC/DOCK5/FMNL3/HAS2/CORO1A/EPB41/ZMYM4/FMNL2/CSF1R/PLXNB3/EPB41L3/PHIP/UNC13D/SH3D19/SHROOM3/PRAG1/MYH10/AGO4/FERMT2/PLXNB2/MYO9A	44
BP	GO:0150115	cell-substrate junction organization	22/1293	106/18862	2.42637e-06	0.0010991	0.000945306	PTK2B/GREM1/KDR/THBS1/LAMC2/LAMB3/MMP14/NRP1/FMN1/ITGA2/LRP1/DST/COL17A1/COL16A1/MACF1/PTPRK/SORBS1/SFRP1/BCL2/LAMC1/EPB41L5/FERMT2	22
BP	GO:0030099	myeloid cell differentiation	55/1293	419/18862	2.57262e-06	0.0010991	0.000945306	F2RL1/TLR4/DHRS2/PTK2B/PRKCQ/CSF3/CD74/MMP9/ADGRF5/IL31RA/THBS1/INHBA/SH3PXD2A/GPR68/CSF2/GAB3/L3MBTL3/CAMK4/MEIS1/NRROS/TNRC6B/TET2/TGFBR2/SLC11A2/KMT2C/RASSF2/TLR3/CASP8/FOXP1/MOV10/EPAS1/ACIN1/TCIRG1/PRKDC/PIK3CD/TNRC6A/TIRAP/NBEAL2/IL11/PIP4K2A/LGALS3/TNFRSF11A/SFRP1/CD109/CSF1R/MTOR/AGO1/NOTCH2/ARID4A/AGO4/KMT2D/MITF/UFL1/TGFBR3/JAK2	55
BP	GO:0072001	renal system development	42/1293	288/18862	2.80892e-06	0.00111093	0.000955483	GREM1/SERPINB7/ANGPT2/MMP9/WNT5A/VANGL2/RBP4/GPR4/BICC1/CYP26B1/DCHS1/TNS2/LAMA5/FMN1/LRP4/TBC1D32/ARG2/SULF2/AKR1B1/FAT4/PDGFD/FGF2/ZBTB14/STRA6/NF1/CEP290/BMPER/AQP11/PLCE1/LGR4/WNT7B/HAS2/SFRP1/PODXL/GREB1L/DYNC2H1/BCL2/PKD2/NOTCH2/YAP1/LHX1/PDGFA	42
BP	GO:0031589	cell-substrate adhesion	49/1293	359/18862	3.00036e-06	0.00111093	0.000955483	PTK2B/GREM1/ANGPT2/ITGA11/KDR/MERTK/LPXN/THBS1/ITGA1/LAMB3/MMP14/ITGB3/NRP1/TIAM1/LAMA5/FMN1/ADAMTS12/ITGA2/PLAU/LRP1/CASK/CARMIL1/PREX1/COL17A1/COL16A1/EMILIN1/UTRN/ATRNL1/MACF1/PTPRK/NF1/ITGA4/RAC2/SORBS1/DOCK5/ATXN3/HAS2/CORO1A/SFRP1/DDR1/BCL2/UNC13D/LAMC1/HPSE/PXN/EPB41L5/FERMT2/JAK2/TRPM7	49
BP	GO:0001822	kidney development	41/1293	280/18862	3.31336e-06	0.00115015	0.000989212	GREM1/SERPINB7/ANGPT2/MMP9/WNT5A/VANGL2/GPR4/BICC1/CYP26B1/DCHS1/TNS2/LAMA5/FMN1/LRP4/TBC1D32/ARG2/SULF2/AKR1B1/FAT4/PDGFD/FGF2/ZBTB14/STRA6/NF1/CEP290/BMPER/AQP11/PLCE1/LGR4/WNT7B/HAS2/SFRP1/PODXL/GREB1L/DYNC2H1/BCL2/PKD2/NOTCH2/YAP1/LHX1/PDGFA	41
BP	GO:0070372	regulation of ERK1 and ERK2 cascade	43/1293	301/18862	3.69941e-06	0.00120862	0.0010395	F2RL1/TLR4/PTK2B/TIMP3/CD74/IL1B/PTPN22/KDR/F2R/DUSP4/NTRK1/SEMA6A/PTPRR/STYX/NRP1/TIAM1/SYNJ2BP/MAP3K12/GAREM1/PDGFD/LRP1/FGF2/ZDHHC17/SEMA7A/EMILIN1/SPRED3/SPRY3/TNFAIP8L3/P2RY6/BMPER/TIRAP/TNFRSF11A/PDGFC/CSF1R/RPS6KA6/NOTCH2/DNAJC27/TNIP1/PRMT5/FERMT2/RAPGEF2/ABCA7/PDGFA	43
BP	GO:0001667	ameboidal-type cell migration	59/1293	473/18862	5.75421e-06	0.00177549	0.00152705	PRSS3/PTK2B/DPP4/GREM1/STC1/ANGPT2/KDR/MMP9/WNT5A/SLC8A1/LPXN/THBS1/PTPRG/SEMA6A/PTPRR/ATP2B4/ITGB3/NRP1/SRPX2/LAMA5/ITGA2/SEMA3F/SYNJ2BP/NANOS1/TGFBR2/FGF2/TIMP1/SEMA7A/FAP/ARSB/SEMA3B/FOXP1/MEGF8/SASH1/ACVR1C/ROBO1/MACF1/NF1/ITGA4/BMPER/PLPP3/PIK3CD/EMC10/DOCK5/STARD13/PLCG1/HAS2/RFFL/PTPRM/HDAC7/MTOR/JCAD/PLCG2/VASH1/SEMA3D/PXN/EPB41L5/PIK3R3/APPL2	59
BP	GO:0001501	skeletal system development	60/1293	486/18862	6.64735e-06	0.00194313	0.00167123	LUM/SOX5/GREM1/STC1/MMP9/WNT5A/CSGALNACT1/CYTL1/MMP16/RBP4/PRRX1/GPR68/MMP14/CYP26B1/DCHS1/PTHLH/RUNX2/FMN1/ADAMTS12/MEIS1/MMP2/VCAN/SNX19/HMGA2/TRPS1/HOXB4/PITX1/SULF2/FAT4/CHST11/EVC/TGFBR2/ATP7A/FGF2/TIMP1/SLC10A7/TNFRSF11B/RASSF2/AKAP13/NDST1/FOXP1/BBX/MEGF8/NPR3/FBN2/FOXN3/WNT7B/HAS2/PIP4K2A/PAPPA2/SFRP1/TAPT1/PDGFC/TCOF1/JAG2/NOTCH2/MBTPS2/DLL3/LHX1/CTC1	60
BP	GO:0001655	urogenital system development	44/1293	320/18862	7.81948e-06	0.00211496	0.00181902	PLAG1/GREM1/SERPINB7/ANGPT2/MMP9/WNT5A/VANGL2/RBP4/GPR4/BICC1/CYP26B1/HOXB13/DCHS1/TNS2/LAMA5/FMN1/LRP4/TBC1D32/ARG2/SULF2/AKR1B1/FAT4/PDGFD/FGF2/ZBTB14/STRA6/NF1/CEP290/BMPER/AQP11/PLCE1/LGR4/WNT7B/HAS2/SFRP1/PODXL/GREB1L/DYNC2H1/BCL2/PKD2/NOTCH2/YAP1/LHX1/PDGFA	44
BP	GO:0010720	positive regulation of cell development	41/1293	290/18862	7.99679e-06	0.00211496	0.00181902	PLAG1/IL1B/ISLR2/LPAR3/RASSF10/CXCL12/GPR68/NIN/RFX3/MAP6/NRP1/TIAM1/LRP1/CARMIL1/PREX1/SEMA7A/PLXNA2/SERPINE2/MEGF8/IL6/ROBO1/MACF1/ZNF335/FZD3/NGFR/PRKDC/DOCK5/CRABP2/ZNF365/HAS2/BCL2/PLXNB3/UNC13D/MTOR/NUMB/MAN2A1/PRMT5/UFL1/FERMT2/PLXNB2/DICER1	41
BP	GO:0071900	regulation of protein serine/threonine kinase activity	60/1293	492/18862	9.73508e-06	0.00245767	0.00211377	TLR4/PTK2B/TRIB2/FLT1/INAVA/TENM1/CD74/IL1B/PTPN22/WNT5A/LPAR3/SLC8A1/TLR6/DUSP4/SFN/THBS1/ITGA1/MAP3K5/ATP2B4/TIAM1/TAB3/SORL1/HMGA2/PKIA/MAP3K12/ETAA1/PDGFD/DUSP18/CCNF/FGF2/GDF15/MAP3K9/AKAP13/DUSP19/SPRED3/MAP4K5/SPRY3/SASH1/ROBO1/NF1/HERC5/TCIM/ADORA2B/SNCA/PLCE1/IGF1R/TNFRSF11A/SFRP1/CCND3/HTT/PRKAR2B/PDGFC/CSF1R/PKD2/MAP3K4/PAQR3/APC/FERMT2/RAPGEF2/PDGFA	60
BP	GO:0050673	epithelial cell proliferation	54/1293	428/18862	1.02084e-05	0.0024651	0.00212016	TLR4/EHF/FLT1/TIE1/KDR/WNT5A/SFN/THBS1/CXCL12/AREG/PTPRN/MMP14/ITGB3/NRP1/COL8A2/IGFBP4/XDH/SYNJ2BP/SULF2/VDR/CLDN1/ATP7A/CASK/FGF2/FAP/IL6/ROBO1/PTPRK/NF1/ITGA4/BMPER/NGFR/TINF2/AQP11/PRKDC/PIK3CD/EMC10/LGR4/PLCG1/HAS2/SFRP1/TGM1/CD109/PTPRM/SAV1/PLXNB3/MTOR/JCAD/LAMC1/NOTCH2/YAP1/VASH1/TGFBR3/AGGF1	54
BP	GO:0050770	regulation of axonogenesis	26/1293	151/18862	1.17412e-05	0.0027171	0.0023369	ISLR2/WNT5A/LPAR3/CXCL12/NIN/SEMA6A/MAP6/NRP1/TIAM1/LRP4/SEMA3F/LRP1/SIPA1L1/SEMA7A/DIP2B/SEMA3B/PLXNA2/MEGF8/ROBO1/MACF1/NGFR/CRABP2/PLXNB3/SEMA3D/PLXNB2/KIF13B	26
BP	GO:1903131	mononuclear cell differentiation	52/1293	411/18862	1.37038e-05	0.00290652	0.00249982	F2RL1/DHRS2/PTK2B/SPN/CD74/IL1B/PTPN22/MERTK/IL18R1/IL12RB1/IL31RA/INHBA/NTRK1/GPR68/MMP14/CSF2/CYP26B1/TRPM2/CAMK4/PRDM1/DOCK10/VNN1/TGFBR2/ATP7A/PREX1/ZBTB7B/FOXP1/TCF7/IL7R/SOS2/IL6/SOS1/NFKBID/ITGA4/ACIN1/TCIRG1/PRKDC/PIK3CD/IL11/SFRP1/PPP2R3C/BCL2/CSF1R/IL7/SOCS5/JAG2/LEPR/MTOR/RAG1/PLCG2/NOTCH2/IFNE	52
BP	GO:0050767	regulation of neurogenesis	46/1293	348/18862	1.39101e-05	0.00290652	0.00249982	PLAG1/IL1B/ISLR2/WNT5A/LPAR3/RASSF10/CXCL12/NIN/SEMA6A/MAP6/NRP1/TIAM1/LRP4/SEMA3F/SORL1/LRP1/NFATC4/SEMA7A/DIP2B/SEMA3B/PLXNA2/SERPINE2/MEGF8/IL6/ROBO1/MACF1/ZNF335/NF1/FZD3/NGFR/CRABP2/ZNF365/PPP3CA/PLXNB3/MTOR/NUMB/YAP1/SEMA3D/MAN2A1/PRMT5/UFL1/DLL3/APPL2/PLXNB2/DICER1/RAPGEF2	46
BP	GO:0043405	regulation of MAP kinase activity	42/1293	307/18862	1.41297e-05	0.00290652	0.00249982	TLR4/PTK2B/TRIB2/FLT1/INAVA/TENM1/CD74/IL1B/PTPN22/WNT5A/LPAR3/TLR6/DUSP4/THBS1/ITGA1/MAP3K5/TIAM1/TAB3/SORL1/MAP3K12/PDGFD/DUSP18/FGF2/GDF15/MAP3K9/AKAP13/DUSP19/SPRED3/MAP4K5/SPRY3/SASH1/ROBO1/NF1/ADORA2B/PLCE1/IGF1R/TNFRSF11A/SFRP1/PDGFC/MAP3K4/PAQR3/PDGFA	42
BP	GO:0060562	epithelial tube morphogenesis	42/1293	309/18862	1.65625e-05	0.00304346	0.0026176	GREM1/TIE1/KDR/WNT5A/NOTCH4/VANGL2/EDNRA/CTHRC1/MMP14/GRHL3/LAMA1/DCHS1/NRP1/LAMA5/FMN1/ADAMTS12/SETDB2/MTHFR/FAT4/TGFBR2/NFATC4/FGF2/FOXP1/MEGF8/CEP290/FZD3/PIK3CD/LGR4/STARD13/SFRP1/DDR1/PODXL/GLMN/BCL2/CSF1R/PKD2/SHROOM3/FKBPL/NOTCH2/YAP1/LHX1/PLXNB2	42
BP	GO:0050772	positive regulation of axonogenesis	17/1293	78/18862	1.68517e-05	0.00304346	0.0026176	ISLR2/LPAR3/CXCL12/NIN/MAP6/NRP1/TIAM1/LRP1/SEMA7A/PLXNA2/MEGF8/ROBO1/MACF1/NGFR/CRABP2/PLXNB3/PLXNB2	17
BP	GO:0031032	actomyosin structure organization	30/1293	191/18862	1.70006e-05	0.00304346	0.0026176	PTK2B/FHOD3/NOX4/NRP1/ARAP1/RAPGEF3/CARMIL1/FRMD5/ARHGEF10/AKAP13/ASAP3/RTKN/ALMS1/CDC42BPB/CDC42BPA/SORBS1/MYO18A/CFL2/SFRP1/EPB41/EPB41L1/EPB41L3/MTOR/PXN/EPB41L5/MYH10/FHOD1/FERMT2/CCDC88A/TRPM7	30
BP	GO:0034329	cell junction assembly	53/1293	425/18862	1.70852e-05	0.00304346	0.0026176	PTK2B/NRCAM/GREM1/SLITRK4/IL1B/KDR/WNT5A/ADGRL3/THBS1/LAMC2/NTRK1/LINGO2/GJD3/LAMB3/MMP14/ADGRL2/DCHS1/NRP1/SRPX2/FMN1/LRFN5/LRP4/ITGA2/PCDHB3/CLDN1/LRP1/DST/PARD6B/PCDHB2/COL17A1/COL16A1/CDH24/LRFN3/MACF1/PTPRK/SORBS1/SNCA/OPHN1/SFRP1/STRN/BCL2/PATJ/ARVCF/EPB41L3/DNER/SPTBN2/APC/LAMC1/EPB41L5/FERMT2/PLXNB2/MYO9A/RAPGEF2	53
BP	GO:0070371	ERK1 and ERK2 cascade	43/1293	320/18862	1.75352e-05	0.00304346	0.0026176	F2RL1/TLR4/PTK2B/TIMP3/CD74/IL1B/PTPN22/KDR/F2R/DUSP4/NTRK1/SEMA6A/PTPRR/STYX/NRP1/TIAM1/SYNJ2BP/MAP3K12/GAREM1/PDGFD/LRP1/FGF2/ZDHHC17/SEMA7A/EMILIN1/SPRED3/SPRY3/TNFAIP8L3/P2RY6/BMPER/TIRAP/TNFRSF11A/PDGFC/CSF1R/RPS6KA6/NOTCH2/DNAJC27/TNIP1/PRMT5/FERMT2/RAPGEF2/ABCA7/PDGFA	43
BP	GO:0006029	proteoglycan metabolic process	18/1293	87/18862	2.0468e-05	0.00344483	0.0029628	NDST3/CSGALNACT1/CYTL1/CHSY3/ADAMTS12/VCAN/SULF2/CHST11/NDST1/ARSB/EXTL3/GLCE/IDS/HPSE/HS2ST1/DSE/FAM20B/CHPF	18
BP	GO:0001942	hair follicle development	17/1293	80/18862	2.39333e-05	0.00377176	0.00324398	WNT5A/INHBA/KRT17/LAMA5/LRP4/FOXE1/ATP7A/SOS1/FZD3/NGFR/LGR4/TMEM79/CD109/BCL2/SAV1/HPSE/PDGFA	17
BP	GO:0060284	regulation of cell development	58/1293	485/18862	2.42988e-05	0.00377176	0.00324398	PLAG1/IL1B/ISLR2/WNT5A/LPAR3/RASSF10/CXCL12/GPR68/NIN/SEMA6A/RFX3/MAP6/PTHLH/NRP1/TIAM1/LRP4/SEMA3F/SORL1/LRP1/NFATC4/CARMIL1/PREX1/SEMA7A/DIP2B/SEMA3B/PLXNA2/SERPINE2/MEGF8/IL6/ROBO1/MACF1/ZNF335/NF1/FZD3/NGFR/PRKDC/DOCK5/CRABP2/ZNF365/HAS2/PPP3CA/BCL2/PLXNB3/UNC13D/MTOR/NUMB/NOTCH2/YAP1/SEMA3D/MAN2A1/PRMT5/UFL1/DLL3/FERMT2/APPL2/PLXNB2/DICER1/RAPGEF2	58
BP	GO:0010837	regulation of keratinocyte proliferation	11/1293	37/18862	2.44478e-05	0.00377176	0.00324398	TLR4/SFN/AREG/VDR/CASK/PTPRK/HAS2/TGM1/CD109/NOTCH2/YAP1	11
BP	GO:0010631	epithelial cell migration	46/1293	357/18862	2.67461e-05	0.0040148	0.00345302	PRSS3/PTK2B/DPP4/GREM1/STC1/ANGPT2/KDR/MMP9/WNT5A/LPXN/THBS1/PTPRG/PTPRR/ATP2B4/ITGB3/NRP1/SRPX2/ITGA2/SYNJ2BP/NANOS1/TGFBR2/FGF2/FAP/ARSB/FOXP1/SASH1/ROBO1/MACF1/NF1/BMPER/PLPP3/PIK3CD/EMC10/DOCK5/STARD13/PLCG1/HAS2/PTPRM/HDAC7/MTOR/JCAD/PLCG2/VASH1/PXN/EPB41L5/PIK3R3	46
BP	GO:0046849	bone remodeling	18/1293	89/18862	2.83036e-05	0.00413679	0.00355794	PTK2B/GREM1/CTHRC1/ITGB3/TNFRSF11B/RASSF2/IL6/NF1/RAC2/TCIRG1/LGR4/TNFRSF11A/SFRP1/CSF1R/IL7/LEPR/NOTCH2/MITF	18
BP	GO:0007265	Ras protein signal transduction	44/1293	338/18862	3.09433e-05	0.00440664	0.00379003	F2RL1/PSD4/F2R/NTRK1/GPR4/ARHGAP5/RAB39A/NRP1/TIAM1/RASGRF1/PSD3/RAB42/RAPGEF3/RAB39B/FGF2/ARHGEF10/AKAP13/ARHGEF11/ARFGEF3/SPRY3/EPS8L2/ROBO1/DENND4B/SOS1/RTKN/NF1/RAC2/ARHGAP24/NGFR/PLCE1/USP28/OPHN1/STARD13/ARFGEF1/ARHGAP29/GBF1/NOTCH2/PRAG1/DENND3/ARHGAP42/CYTH1/ARHGEF12/JAK2/RAPGEF2	44
BP	GO:0090132	epithelium migration	46/1293	360/18862	3.3011e-05	0.00458357	0.0039422	PRSS3/PTK2B/DPP4/GREM1/STC1/ANGPT2/KDR/MMP9/WNT5A/LPXN/THBS1/PTPRG/PTPRR/ATP2B4/ITGB3/NRP1/SRPX2/ITGA2/SYNJ2BP/NANOS1/TGFBR2/FGF2/FAP/ARSB/FOXP1/SASH1/ROBO1/MACF1/NF1/BMPER/PLPP3/PIK3CD/EMC10/DOCK5/STARD13/PLCG1/HAS2/PTPRM/HDAC7/MTOR/JCAD/PLCG2/VASH1/PXN/EPB41L5/PIK3R3	46
BP	GO:0031345	negative regulation of cell projection organization	28/1293	180/18862	3.83257e-05	0.0051051	0.00439076	WNT5A/PTPRG/SEMA6A/CRMP1/NRP1/LRP4/SEMA3F/LRP1/NFATC4/SEMA7A/DIP2B/SEMA3B/SPRY3/ODF2L/KREMEN1/ARHGAP24/NGFR/ZNF365/LIMK2/PPP3CA/GFI1/PLXNB3/TBC1D7/PAQR3/YAP1/SEMA3D/PRAG1/RAPGEF2	28
BP	GO:0022404	molting cycle process	17/1293	83/18862	3.95246e-05	0.0051051	0.00439076	WNT5A/INHBA/KRT17/LAMA5/LRP4/FOXE1/ATP7A/SOS1/FZD3/NGFR/LGR4/TMEM79/CD109/BCL2/SAV1/HPSE/PDGFA	17
BP	GO:0022405	hair cycle process	17/1293	83/18862	3.95246e-05	0.0051051	0.00439076	WNT5A/INHBA/KRT17/LAMA5/LRP4/FOXE1/ATP7A/SOS1/FZD3/NGFR/LGR4/TMEM79/CD109/BCL2/SAV1/HPSE/PDGFA	17
BP	GO:0010975	regulation of neuron projection development	52/1293	428/18862	4.1458e-05	0.00523313	0.00450087	PTK2B/ISLR2/WNT5A/LPAR3/NTRK1/FEZ1/CXCL12/PRRX1/PTPRG/NIN/SEMA6A/CRMP1/MAP6/LZTS1/NRP1/TIAM1/LRP4/SEMA3F/TANC2/LRP1/NFATC4/MBOAT1/PREX1/SIPA1L1/SEMA7A/ARSB/DIP2B/SEMA3B/NCKIPSD/PLXNA2/MEGF8/ROBO1/MACF1/KREMEN1/NGFR/CRABP2/ZNF365/SFRP1/PPP3CA/GFI1/CAMSAP2/TMEM30A/PLXNB3/PAQR3/MTOR/SEMA3D/PRAG1/PLXNB2/KIF13B/CCDC88A/NEDD4/RAPGEF2	52
BP	GO:0071902	positive regulation of protein serine/threonine kinase activity	41/1293	311/18862	4.2565e-05	0.00525347	0.00451836	TLR4/PTK2B/FLT1/INAVA/TENM1/CD74/IL1B/WNT5A/LPAR3/TLR6/THBS1/ITGA1/MAP3K5/ATP2B4/TIAM1/TAB3/HMGA2/MAP3K12/ETAA1/PDGFD/FGF2/GDF15/MAP3K9/AKAP13/DUSP19/MAP4K5/SASH1/ROBO1/TCIM/ADORA2B/SNCA/PLCE1/TNFRSF11A/CCND3/PDGFC/CSF1R/PKD2/MAP3K4/FERMT2/RAPGEF2/PDGFA	41
BP	GO:0007160	cell-matrix adhesion	33/1293	230/18862	4.4078e-05	0.00532194	0.00457725	PTK2B/GREM1/ITGA11/KDR/THBS1/ITGA1/MMP14/ITGB3/NRP1/TIAM1/FMN1/ADAMTS12/ITGA2/PLAU/LRP1/CASK/COL17A1/COL16A1/EMILIN1/UTRN/MACF1/PTPRK/NF1/ITGA4/SORBS1/SFRP1/DDR1/BCL2/HPSE/PXN/EPB41L5/FERMT2/TRPM7	33
BP	GO:0098773	skin epidermis development	17/1293	84/18862	4.64298e-05	0.00538111	0.00462814	WNT5A/INHBA/KRT17/LAMA5/LRP4/FOXE1/ATP7A/SOS1/FZD3/NGFR/LGR4/TMEM79/CD109/BCL2/SAV1/HPSE/PDGFA	17
BP	GO:0090130	tissue migration	46/1293	365/18862	4.65058e-05	0.00538111	0.00462814	PRSS3/PTK2B/DPP4/GREM1/STC1/ANGPT2/KDR/MMP9/WNT5A/LPXN/THBS1/PTPRG/PTPRR/ATP2B4/ITGB3/NRP1/SRPX2/ITGA2/SYNJ2BP/NANOS1/TGFBR2/FGF2/FAP/ARSB/FOXP1/SASH1/ROBO1/MACF1/NF1/BMPER/PLPP3/PIK3CD/EMC10/DOCK5/STARD13/PLCG1/HAS2/PTPRM/HDAC7/MTOR/JCAD/PLCG2/VASH1/PXN/EPB41L5/PIK3R3	46
BP	GO:0048041	focal adhesion assembly	17/1293	85/18862	5.43801e-05	0.00609721	0.00524404	PTK2B/GREM1/KDR/THBS1/MMP14/NRP1/FMN1/ITGA2/LRP1/COL16A1/MACF1/PTPRK/SORBS1/SFRP1/BCL2/EPB41L5/FERMT2	17
BP	GO:0032970	regulation of actin filament-based process	48/1293	389/18862	5.48903e-05	0.00609721	0.00524404	F2RL1/PTK2B/TMSB4Y/TENM1/CSF3/STC1/FHOD3/PDE4D/RHOF/CXCL12/NOX4/GRHL3/TRPM2/PDE4B/NRP1/FMN1/VILL/PLEKHG2/ARAP1/RAPGEF3/PLEKHH2/LRP1/CARMIL1/PREX1/SSH1/ARHGEF10/DSG2/AKAP13/ASAP3/DSC2/SPTBN1/ARHGAP18/ALMS1/RAC2/ARFGEF1/CFL2/CORO1A/SFRP1/CSF1R/SPTBN2/MTOR/ARHGEF19/NOTCH2/PXN/FHOD1/FERMT2/CCDC88A/PDGFA	48
BP	GO:0051960	regulation of nervous system development	51/1293	422/18862	5.62336e-05	0.00612395	0.00526704	PLAG1/IL1B/ISLR2/WNT5A/LPAR3/RASSF10/NTRK1/CXCL12/LINGO2/NIN/SEMA6A/MAP6/ADGRL2/NRP1/TIAM1/SRPX2/LRP4/SEMA3F/SORL1/TNFRSF21/LRP1/NFATC4/SEMA7A/DIP2B/SEMA3B/PLXNA2/SERPINE2/MEGF8/IL6/ROBO1/MACF1/ZNF335/NF1/FZD3/NGFR/CRABP2/ZNF365/PPP3CA/PLXNB3/MTOR/NUMB/YAP1/SEMA3D/MAN2A1/PRMT5/UFL1/DLL3/APPL2/PLXNB2/DICER1/RAPGEF2	51
BP	GO:0048771	tissue remodeling	27/1293	175/18862	6.04891e-05	0.00636475	0.00547415	PTK2B/GREM1/TIE1/F2R/TGM2/CTHRC1/MMP14/ITGB3/MMP2/ATP7A/TIMP1/TNFRSF11B/RASSF2/IL6/EPAS1/NF1/RAC2/TCIRG1/LGR4/TNFRSF11A/SFRP1/PPP3CA/CSF1R/IL7/LEPR/NOTCH2/MITF	27
BP	GO:0002573	myeloid leukocyte differentiation	30/1293	204/18862	6.07367e-05	0.00636475	0.00547415	F2RL1/TLR4/DHRS2/CSF3/CD74/MMP9/IL31RA/INHBA/SH3PXD2A/GPR68/CSF2/GAB3/L3MBTL3/CAMK4/NRROS/TGFBR2/RASSF2/TLR3/CASP8/FOXP1/ACIN1/TCIRG1/PIK3CD/TNFRSF11A/SFRP1/CD109/CSF1R/MTOR/NOTCH2/MITF	30
BP	GO:0072567	chemokine (C-X-C motif) ligand 2 production	7/1293	17/18862	7.38513e-05	0.00745764	0.00641411	F2RL1/TLR4/CD74/LPL/LRP1/FOXP1/TIRAP	7
BP	GO:2000341	regulation of chemokine (C-X-C motif) ligand 2 production	7/1293	17/18862	7.38513e-05	0.00745764	0.00641411	F2RL1/TLR4/CD74/LPL/LRP1/FOXP1/TIRAP	7
BP	GO:0050769	positive regulation of neurogenesis	31/1293	217/18862	8.04776e-05	0.00798165	0.0068648	PLAG1/IL1B/ISLR2/LPAR3/RASSF10/CXCL12/NIN/MAP6/NRP1/TIAM1/LRP1/SEMA7A/PLXNA2/SERPINE2/MEGF8/IL6/ROBO1/MACF1/ZNF335/FZD3/NGFR/CRABP2/ZNF365/PLXNB3/MTOR/NUMB/MAN2A1/PRMT5/UFL1/PLXNB2/DICER1	31
BP	GO:0050678	regulation of epithelial cell proliferation	46/1293	374/18862	8.41074e-05	0.00806144	0.00693342	TLR4/FLT1/TIE1/KDR/WNT5A/SFN/THBS1/CXCL12/AREG/PTPRN/ITGB3/NRP1/XDH/SYNJ2BP/SULF2/VDR/CLDN1/ATP7A/CASK/FGF2/ROBO1/PTPRK/NF1/ITGA4/NGFR/TINF2/AQP11/PRKDC/PIK3CD/EMC10/PLCG1/HAS2/SFRP1/TGM1/CD109/PTPRM/SAV1/PLXNB3/MTOR/JCAD/LAMC1/NOTCH2/YAP1/VASH1/TGFBR3/AGGF1	46
BP	GO:0042303	molting cycle	19/1293	105/18862	8.56365e-05	0.00806144	0.00693342	WNT5A/MPZL3/INHBA/KRT17/TRPV3/LAMA5/LRP4/FOXE1/ATP7A/SOS1/FZD3/NGFR/LGR4/TMEM79/CD109/BCL2/SAV1/HPSE/PDGFA	19
BP	GO:0042633	hair cycle	19/1293	105/18862	8.56365e-05	0.00806144	0.00693342	WNT5A/MPZL3/INHBA/KRT17/TRPV3/LAMA5/LRP4/FOXE1/ATP7A/SOS1/FZD3/NGFR/LGR4/TMEM79/CD109/BCL2/SAV1/HPSE/PDGFA	19
BP	GO:0008360	regulation of cell shape	24/1293	151/18862	9.45769e-05	0.00875467	0.00752965	PTK2B/KDR/RHOF/BRWD3/ARAP1/SH3KBP1/FGD4/PLXNA2/DNMBP/ARHGAP18/RAC2/FMNL3/CORO1A/EPB41/FMNL2/CSF1R/PLXNB3/EPB41L3/PHIP/SHROOM3/PRAG1/MYH10/FERMT2/PLXNB2	24
BP	GO:0032642	regulation of chemokine production	17/1293	89/18862	9.94978e-05	0.00905919	0.00779156	F2RL1/TLR4/CXCL6/CD74/IL1B/LPL/WNT5A/ARG2/LRP1/TLR3/FOXP1/IL6/TIRAP/MAVS/CSF1R/IL7/SOCS5	17
BP	GO:0035567	non-canonical Wnt signaling pathway	24/1293	153/18862	0.00011676	0.0104594	0.00899584	WNT5A/PRICKLE2/VANGL2/GNG2/CTHRC1/GRHL3/TIAM1/TNRC6B/CELSR2/MOV10/PSMA6/FZD3/ANKRD6/DAAM1/TNRC6A/CELSR3/SFRP1/PPP3CA/PSME2/PSMB9/ARHGEF19/AGO1/PSME1/AGO4	24
BP	GO:0030098	lymphocyte differentiation	44/1293	358/18862	0.000120856	0.0106545	0.00916364	PTK2B/SPN/CD74/IL1B/PTPN22/MERTK/IL18R1/IL12RB1/INHBA/NTRK1/MMP14/CYP26B1/CAMK4/PRDM1/DOCK10/VNN1/TGFBR2/ATP7A/PREX1/ZBTB7B/FOXP1/TCF7/IL7R/SOS2/IL6/SOS1/NFKBID/ITGA4/TCIRG1/PRKDC/PIK3CD/IL11/SFRP1/PPP2R3C/BCL2/IL7/SOCS5/JAG2/LEPR/MTOR/RAG1/PLCG2/NOTCH2/IFNE	44
BP	GO:0051962	positive regulation of nervous system development	35/1293	263/18862	0.000124607	0.0107148	0.00921551	PLAG1/IL1B/ISLR2/LPAR3/RASSF10/NTRK1/CXCL12/LINGO2/NIN/MAP6/ADGRL2/NRP1/TIAM1/SRPX2/LRP1/SEMA7A/PLXNA2/SERPINE2/MEGF8/IL6/ROBO1/MACF1/ZNF335/FZD3/NGFR/CRABP2/ZNF365/PLXNB3/MTOR/NUMB/MAN2A1/PRMT5/UFL1/PLXNB2/DICER1	35
BP	GO:1900076	regulation of cellular response to insulin stimulus	14/1293	66/18862	0.000125398	0.0107148	0.00921551	PRKCQ/IL1B/LPL/IRS1/TNS2/SORL1/PID1/ZBTB7B/PTPRE/SORBS1/ATP2B1/ENPP1/PIP4K2A/APPL2	14
BP	GO:0061138	morphogenesis of a branching epithelium	26/1293	173/18862	0.000127824	0.0107565	0.00925141	GREM1/TIE1/KDR/WNT5A/NOTCH4/TGM2/EDNRA/MMP14/LAMA1/HOXB13/DCHS1/NRP1/LAMA5/FAT4/TGFBR2/NFATC4/FGF2/LGR4/SFRP1/DDR1/BCL2/PKD2/FKBPL/YAP1/LHX1/PDGFA	26
BP	GO:0032535	regulation of cellular component size	45/1293	370/18862	0.000129905	0.0107686	0.00926173	F2RL1/PTK2B/NRCAM/TMSB4Y/TENM1/CSF3/ISLR2/FHOD3/WNT5A/LPAR3/CXCL12/SEMA6A/NRP1/FMN1/VILL/SEMA3F/WNK3/KCNN4/PLEKHG2/ATP13A2/PLEKHH2/LRP1/ATP7A/CARMIL1/PREX1/SSH1/SEMA7A/DIP2B/SEMA3B/SPTBN1/IL7R/MEGF8/SLC12A2/MACF1/SLC12A6/ARHGAP18/CLCN3/AQP11/CRABP2/ARFGEF1/CFL2/CORO1A/SPTBN2/MTOR/SEMA3D	45
BP	GO:0060326	cell chemotaxis	39/1293	306/18862	0.000134548	0.0109121	0.00938519	F2RL1/PTK2B/CXCL5/DPP4/FLT1/PRKCQ/CXCL6/GREM1/CD74/RARRES2/KDR/WNT5A/DOCK4/THBS1/CXCL12/ITGA1/CXCR6/TRPM2/MTUS1/PDE4B/NRP1/TIAM1/PDGFD/CXCL1/PREX1/FGF2/SLC12A2/IL6/RAC2/PIK3CD/TIRAP/CORO1A/LGALS3/TNFRSF11A/LYST/CSF1R/PLXNB3/CCRL2/GBF1	39
BP	GO:0090066	regulation of anatomical structure size	56/1293	493/18862	0.000135566	0.0109121	0.00938519	F2RL1/PTK2B/NRCAM/TMSB4Y/TENM1/CSF3/ISLR2/F2R/FHOD3/WNT5A/LPAR3/SLC8A1/DOCK4/P2RY2/EDNRA/CXCL12/ITGA1/SEMA6A/NRP1/FMN1/VILL/SEMA3F/WNK3/KCNN4/PLEKHG2/ATP13A2/PLEKHH2/LRP1/ATP7A/CARMIL1/PREX1/SSH1/SEMA7A/DIP2B/SEMA3B/SPTBN1/IL7R/MEGF8/SLC12A2/MACF1/HTR1D/SLC12A6/ARHGAP18/CLCN3/AQP11/ATP2B1/DOCK5/CRABP2/ARFGEF1/CFL2/CORO1A/HTR7/SPTBN2/MTOR/SEMA3D/ARHGAP42	56
BP	GO:0016050	vesicle organization	42/1293	339/18862	0.000143064	0.0113053	0.0097234	ANXA8L1/SRPX/GPR143/SHROOM2/F2R/COL7A1/AREG/PTPRN/RAB39A/GRIK5/TRIM9/CPLANE2/SNX19/ATP13A2/ANXA8/HOOK1/SEC23A/PRRT2/CCDC136/ALS2CL/SERPINE2/SYT11/CLCN3/TRAPPC6B/SAMD9/EEA1/AQP11/SNCA/MYO18A/SCFD1/HPS4/TAP2/PIP4K2A/CORO1A/SPG11/LYST/EPS15/BCL2/ANKRD28/GBF1/KIF13A/CHMP4C	42
BP	GO:0043030	regulation of macrophage activation	13/1293	59/18862	0.000144523	0.0113053	0.0097234	TLR4/CD74/WNT5A/PLA2G4A/ADGRF5/TLR6/IL31RA/THBS1/LRFN5/IL6/SYT11/SHPK/MYO18A	13
BP	GO:0051235	maintenance of location	40/1293	319/18862	0.000157848	0.0120513	0.010365	C3/PTK2B/JPH4/TMSB4Y/IL1B/F2R/LPL/AKAP6/PDE4D/SLC8A1/TRPM2/DGAT2/ITGB3/GRIK5/NRROS/FTH1/SORL1/ERO1A/GM2A/ANK3/FGF2/DMD/LTBP1/ACVR1C/VPS13D/IL6/LDAH/FBN2/P2RY6/SNCA/VPS13C/CDS1/ENPP1/PLCG1/CORO1A/HTT/TAPT1/PKD2/PLCG2/CCDC88A	40
BP	GO:2000379	positive regulation of reactive oxygen species metabolic process	18/1293	101/18862	0.000159288	0.0120513	0.010365	AKR1C3/F2RL1/TLR4/PTK2B/IL1B/TLR6/THBS1/NOX4/XDH/PID1/TGFBR2/SLC5A3/CLCN3/NOS1AP/SNCA/PKD2/MTOR/JAK2	18
BP	GO:0090288	negative regulation of cellular response to growth factor stimulus	19/1293	110/18862	0.000162605	0.0120513	0.010365	GREM1/WNT5A/THBS1/HTRA3/SEMA6A/ATP2B4/ADAMTS12/SORL1/XDH/SULF2/CASK/FGF2/EMILIN1/SPRY3/BMPER/NGFR/SFRP1/NEDD4/TRIM33	19
BP	GO:0032956	regulation of actin cytoskeleton organization	43/1293	352/18862	0.000164561	0.0120513	0.010365	F2RL1/PTK2B/TMSB4Y/TENM1/CSF3/FHOD3/RHOF/CXCL12/NOX4/GRHL3/TRPM2/NRP1/FMN1/VILL/PLEKHG2/ARAP1/RAPGEF3/PLEKHH2/LRP1/CARMIL1/PREX1/SSH1/ARHGEF10/AKAP13/ASAP3/SPTBN1/ARHGAP18/ALMS1/RAC2/ARFGEF1/CFL2/CORO1A/SFRP1/CSF1R/SPTBN2/MTOR/ARHGEF19/NOTCH2/PXN/FHOD1/FERMT2/CCDC88A/PDGFA	43
BP	GO:0030201	heparan sulfate proteoglycan metabolic process	9/1293	31/18862	0.000164909	0.0120513	0.010365	NDST3/CSGALNACT1/SULF2/NDST1/EXTL3/GLCE/HPSE/HS2ST1/DSE	9
BP	GO:0120032	regulation of plasma membrane bounded cell projection assembly	27/1293	186/18862	0.000172891	0.0122855	0.0105664	F2RL1/TENM1/TRPM2/NRP1/ARAP1/ATP7A/ZMYND8/EPS8L2/ODF2L/RAC2/ARHGAP24/PLCE1/CDKL1/SDCCAG8/LIMK2/HTT/PODXL/TAPT1/PLEK2/PLXNB3/SYNE2/TBC1D7/APC/MTOR/YAP1/FMR1/CCDC88A	27
BP	GO:0048017	inositol lipid-mediated signaling	28/1293	196/18862	0.000174387	0.0122855	0.0105664	F2RL1/CA8/FLT1/CSF3/GPR143/KDR/F2R/KCNH1/NTRK1/IRS1/PITPNM2/PEAR1/ENTPD5/PDGFD/FGF2/SERPINE2/NPR3/TNFAIP8L3/NF1/PLCE1/PIK3CD/PIP4K2A/IGF1R/PDGFC/CSF1R/NEDD4/JAK2/PDGFA	28
BP	GO:0014911	positive regulation of smooth muscle cell migration	11/1293	45/18862	0.000174748	0.0122855	0.0105664	DOCK4/NOX4/NRP1/ITGA2/PDGFD/LRP1/ATP7A/SSH1/DOCK5/HAS2/BCL2	11
BP	GO:0042116	macrophage activation	18/1293	102/18862	0.000181233	0.0125821	0.0108215	TLR4/CD74/WNT5A/PLA2G4A/ADGRF5/TLR6/IL31RA/THBS1/CSF2/LRFN5/TLR3/FOXP1/IL6/SYT11/SHPK/SNCA/MYO18A/JAK2	18
BP	GO:0009100	glycoprotein metabolic process	49/1293	421/18862	0.000195709	0.0130436	0.0112184	NDST3/B3GNT7/CSGALNACT1/B3GNT8/CYTL1/CHSY3/MAN1A1/FBXO2/ADAMTS12/B4GALT6/TMTC3/GXYLT2/VCAN/TMTC1/SULF2/ENTPD5/CHST11/TET2/ATP7A/FUT8/NDST1/ARSB/TET1/KRTCAP2/EDEM1/GALNT1/FBXO27/ALG10/SRD5A3/ALG9/AQP11/B4GAT1/ARFGEF1/GXYLT1/EXTL3/BCL2/GLCE/EDEM3/IDS/HPSE/HS2ST1/DSE/FAM20B/MGAT5/TNIP1/MAN2A1/PORCN/ABCA7/CHPF	49
BP	GO:0002720	positive regulation of cytokine production involved in immune response	12/1293	53/18862	0.000196561	0.0130436	0.0112184	F2RL1/TLR4/LAPTM5/CD74/IL1B/WNT5A/IL18R1/TNFRSF14/IL1R1/SEMA7A/IL6/MAVS	12
BP	GO:0051924	regulation of calcium ion transport	32/1293	238/18862	0.000197197	0.0130436	0.0112184	PTK2B/EHD3/JPH4/STC1/F2R/AKAP6/LPAR3/PDE4D/SLC8A1/CXCL12/TRPV3/PDE4B/WNK3/TRPC3/DMD/BEST1/PACSIN3/P2RY6/NOS1AP/SNCA/ATP2B1/CACNA2D1/PLCG1/CORO1A/LGALS3/EPB41/HTT/BCL2/PKD2/STIM2/PLCG2/FMR1	32
BP	GO:0031346	positive regulation of cell projection organization	42/1293	344/18862	0.000197274	0.0130436	0.0112184	F2RL1/PTK2B/TENM1/ISLR2/WNT5A/LPAR3/NTRK1/FEZ1/CXCL12/NIN/MAP6/NRP1/TIAM1/ITGA2/ARAP1/LRP1/ATP7A/CARMIL1/SEMA7A/ARSB/ZMYND8/NCKIPSD/PLXNA2/MEGF8/EPS8L2/ROBO1/MACF1/RAC2/NGFR/PLCE1/CRABP2/HTT/TAPT1/TMEM30A/PLEK2/PLXNB3/APC/MTOR/FMR1/PLXNB2/CCDC88A/RAPGEF2	42
BP	GO:0060491	regulation of cell projection assembly	27/1293	188/18862	0.00020675	0.0135093	0.011619	F2RL1/TENM1/TRPM2/NRP1/ARAP1/ATP7A/ZMYND8/EPS8L2/ODF2L/RAC2/ARHGAP24/PLCE1/CDKL1/SDCCAG8/LIMK2/HTT/PODXL/TAPT1/PLEK2/PLXNB3/SYNE2/TBC1D7/APC/MTOR/YAP1/FMR1/CCDC88A	27
BP	GO:0048841	regulation of axon extension involved in axon guidance	9/1293	32/18862	0.000215587	0.0139229	0.0119747	WNT5A/CXCL12/SEMA6A/NRP1/SEMA3F/SEMA7A/SEMA3B/MEGF8/SEMA3D	9
BP	GO:0050808	synapse organization	48/1293	412/18862	0.000221188	0.0141204	0.0121446	C3/NRCAM/SLITRK4/FRMPD4/F2R/WNT5A/ACTBL2/COL4A5/ADGRL3/NTRK1/INA/LINGO2/NDRG1/PCDHGC5/ADGRL2/TIAM1/SRPX2/LRFN5/LRP4/SEMA3F/TANC2/PCDHB3/RAB39B/PCDHGC3/DOCK10/NFATC4/ANK3/SIPA1L1/SSH1/PCDHB2/PPFIBP1/ZMYND8/LRFN3/UTRN/NOS1AP/SNCA/DRP2/OPHN1/WNT7B/ZNF365/IGF1R/DNER/SPTBN2/ITSN1/SNCG/MYH10/PLXNB2/NEDD4	48
BP	GO:1900077	negative regulation of cellular response to insulin stimulus	10/1293	39/18862	0.00022455	0.0141722	0.0121891	PRKCQ/IL1B/LPL/IRS1/TNS2/PID1/PTPRE/ENPP1/PIP4K2A/APPL2	10
BP	GO:0032602	chemokine production	17/1293	95/18862	0.000228037	0.0142305	0.0122393	F2RL1/TLR4/CXCL6/CD74/IL1B/LPL/WNT5A/ARG2/LRP1/TLR3/FOXP1/IL6/TIRAP/MAVS/CSF1R/IL7/SOCS5	17
BP	GO:0043406	positive regulation of MAP kinase activity	31/1293	230/18862	0.000235683	0.0145077	0.0124777	TLR4/PTK2B/FLT1/INAVA/TENM1/CD74/IL1B/WNT5A/LPAR3/TLR6/THBS1/ITGA1/MAP3K5/TIAM1/TAB3/MAP3K12/PDGFD/FGF2/GDF15/MAP3K9/AKAP13/DUSP19/MAP4K5/SASH1/ROBO1/ADORA2B/PLCE1/TNFRSF11A/PDGFC/MAP3K4/PDGFA	31
BP	GO:0010632	regulation of epithelial cell migration	37/1293	293/18862	0.000237703	0.0145077	0.0124777	PTK2B/STC1/ANGPT2/KDR/MMP9/WNT5A/THBS1/PTPRG/PTPRR/ATP2B4/ITGB3/NRP1/SRPX2/ITGA2/SYNJ2BP/TGFBR2/FGF2/ARSB/FOXP1/SASH1/MACF1/NF1/BMPER/PLPP3/PIK3CD/EMC10/DOCK5/STARD13/PLCG1/HAS2/PTPRM/HDAC7/MTOR/JCAD/PLCG2/VASH1/EPB41L5	37
BP	GO:0030166	proteoglycan biosynthetic process	13/1293	62/18862	0.00024487	0.0147136	0.0126548	NDST3/CSGALNACT1/CYTL1/CHSY3/VCAN/CHST11/NDST1/EXTL3/GLCE/HS2ST1/DSE/FAM20B/CHPF	13
BP	GO:0046578	regulation of Ras protein signal transduction	27/1293	190/18862	0.000246375	0.0147136	0.0126548	F2RL1/PSD4/F2R/NTRK1/GPR4/NRP1/RASGRF1/PSD3/ARHGEF10/AKAP13/ARFGEF3/SPRY3/EPS8L2/ROBO1/DENND4B/ARHGAP24/PLCE1/OPHN1/STARD13/ARFGEF1/GBF1/NOTCH2/PRAG1/DENND3/ARHGAP42/CYTH1/JAK2	27
BP	GO:1902903	regulation of supramolecular fiber organization	44/1293	370/18862	0.000253827	0.0149974	0.0128988	F2RL1/PTK2B/TMSB4Y/TENM1/CSF3/FHOD3/CXCL12/MID1IP1/NIN/NOX4/MAP1A/NRP1/FMN1/VILL/PLEKHG2/ARAP1/RAPGEF3/PLEKHH2/CARMIL1/PREX1/SSH1/ARHGEF10/AKAP13/ASAP3/SPTBN1/EMILIN1/ARHGAP18/ALMS1/SNCA/TOGARAM1/ARFGEF1/CFL2/CORO1A/SFRP1/CAMSAP2/SPTBN2/APC/MTOR/EML2/PXN/FHOD1/SPAST/FERMT2/CCDC88A	44
BP	GO:0007173	epidermal growth factor receptor signaling pathway	20/1293	123/18862	0.000257396	0.0150482	0.0129425	PTK2B/FAM83A/MMP9/AREG/ITGA1/KIF16B/REPS2/ARAP1/GAREM1/SH3KBP1/RASSF2/SOS1/PLCE1/PLCG1/PTPN12/EPS15/CBLB/SOCS5/CCDC88A/SNX6	20
BP	GO:0006023	aminoglycan biosynthetic process	19/1293	114/18862	0.000262572	0.0151909	0.0130653	LUM/NDST3/IL1B/B3GNT7/CSGALNACT1/B3GNT8/CHSY3/B4GALT6/VCAN/CHST11/SLC10A7/NDST1/SDC3/B4GAT1/HAS2/GLCE/HS2ST1/DSE/CHPF	19
BP	GO:0060402	calcium ion transport into cytosol	23/1293	152/18862	0.00027621	0.0157379	0.0135357	PTK2B/JPH4/F2R/AKAP6/PDE4D/SLC8A1/GRIN2D/TRPV3/TRPM2/ATP2B4/ERO1A/TRPC3/FGF2/DMD/P2RY6/SNCA/CACNA2D1/PLCG1/CORO1A/HTT/BCL2/PKD2/PLCG2	23
BP	GO:0033692	cellular polysaccharide biosynthetic process	14/1293	71/18862	0.000282803	0.0157379	0.0135357	NDST3/B3GNT7/CSGALNACT1/B3GNT8/IRS1/PPP1R3E/NDST1/PPP1R3D/SORBS1/PGM2L1/ENPP1/HAS2/MTOR/HS2ST1	14
BP	GO:2000343	positive regulation of chemokine (C-X-C motif) ligand 2 production	5/1293	10/18862	0.000282821	0.0157379	0.0135357	TLR4/CD74/LPL/LRP1/TIRAP	5
BP	GO:0014909	smooth muscle cell migration	16/1293	88/18862	0.000285825	0.0157379	0.0135357	DOCK4/NOX4/ITGB3/NRP1/ITGA2/SORL1/PLAU/PDGFD/LRP1/ATP7A/SSH1/DOCK5/HAS2/DDR1/BCL2/PDGFA	16
BP	GO:0006022	aminoglycan metabolic process	25/1293	172/18862	0.000289895	0.0157379	0.0135357	LUM/NDST3/IL1B/B3GNT7/CSGALNACT1/B3GNT8/CHSY3/B4GALT6/VCAN/CHST11/FUCA1/FGF2/SLC10A7/NDST1/ARSB/SDC3/B4GAT1/HAS2/GLCE/IDS/CTBS/HPSE/HS2ST1/DSE/CHPF	25
BP	GO:0048015	phosphatidylinositol-mediated signaling	27/1293	192/18862	0.000292591	0.0157379	0.0135357	F2RL1/CA8/FLT1/CSF3/GPR143/KDR/F2R/KCNH1/NTRK1/IRS1/PITPNM2/PEAR1/ENTPD5/PDGFD/FGF2/SERPINE2/NPR3/NF1/PLCE1/PIK3CD/PIP4K2A/IGF1R/PDGFC/CSF1R/NEDD4/JAK2/PDGFA	27
BP	GO:0048754	branching morphogenesis of an epithelial tube	22/1293	143/18862	0.000292724	0.0157379	0.0135357	GREM1/TIE1/KDR/WNT5A/NOTCH4/EDNRA/MMP14/LAMA1/DCHS1/NRP1/LAMA5/FAT4/TGFBR2/NFATC4/FGF2/LGR4/DDR1/BCL2/PKD2/FKBPL/YAP1/LHX1	22
BP	GO:1903510	mucopolysaccharide metabolic process	19/1293	115/18862	0.000294696	0.0157379	0.0135357	LUM/NDST3/IL1B/B3GNT7/CSGALNACT1/CHSY3/B4GALT6/VCAN/CHST11/FGF2/SLC10A7/NDST1/ARSB/B4GAT1/HAS2/GLCE/IDS/DSE/CHPF	19
BP	GO:0097553	calcium ion transmembrane import into cytosol	21/1293	134/18862	0.000307799	0.0162811	0.0140029	PTK2B/JPH4/F2R/AKAP6/PDE4D/SLC8A1/GRIN2D/TRPV3/TRPM2/ATP2B4/ERO1A/FGF2/DMD/P2RY6/SNCA/CACNA2D1/PLCG1/CORO1A/HTT/PKD2/PLCG2	21
BP	GO:0008361	regulation of cell size	25/1293	173/18862	0.000317272	0.0164884	0.0141812	NRCAM/ISLR2/WNT5A/LPAR3/CXCL12/SEMA6A/NRP1/SEMA3F/WNK3/KCNN4/LRP1/ATP7A/SEMA7A/DIP2B/SEMA3B/IL7R/MEGF8/SLC12A2/MACF1/SLC12A6/CLCN3/AQP11/CRABP2/MTOR/SEMA3D	25
BP	GO:0060348	bone development	27/1293	193/18862	0.000318454	0.0164884	0.0141812	GREM1/STC1/CSGALNACT1/MMP16/GPR68/MMP14/CYP26B1/DCHS1/MEIS1/HOXB4/SULF2/FAT4/TGFBR2/SLC10A7/AKAP13/FOXP1/BBX/MEGF8/FOXN3/HAS2/PIP4K2A/PAPPA2/TAPT1/PDGFC/NOTCH2/MBTPS2/CTC1	27
BP	GO:0043616	keratinocyte proliferation	11/1293	48/18862	0.000321791	0.0164884	0.0141812	TLR4/SFN/AREG/VDR/CASK/PTPRK/HAS2/TGM1/CD109/NOTCH2/YAP1	11
BP	GO:0001738	morphogenesis of a polarized epithelium	22/1293	144/18862	0.000323593	0.0164884	0.0141812	WNT5A/PRICKLE2/VANGL2/CTHRC1/GRHL3/LAMA1/ASTN2/TIAM1/LAMA5/CELSR2/PSMA6/FZD3/ANKRD6/DAAM1/OPHN1/CELSR3/SFRP1/PSME2/PSMB9/ARHGEF19/PSME1/MYO9A	22
BP	GO:0050920	regulation of chemotaxis	30/1293	224/18862	0.000329164	0.0166198	0.0142942	F2RL1/PTK2B/DPP4/GREM1/ANGPT2/CD74/RARRES2/KDR/WNT5A/THBS1/CXCL12/SEMA6A/MTUS1/NRP1/TIAM1/ITGA2/SEMA3F/PDGFD/MYCBP2/FGF2/SEMA7A/SEMA3B/MEGF8/IL6/ROBO1/RAC2/ZSWIM5/TIRAP/CSF1R/SEMA3D	30
BP	GO:0006024	glycosaminoglycan biosynthetic process	18/1293	107/18862	0.000335328	0.0167785	0.0144307	LUM/NDST3/IL1B/B3GNT7/CSGALNACT1/CHSY3/B4GALT6/VCAN/CHST11/SLC10A7/NDST1/SDC3/B4GAT1/HAS2/GLCE/HS2ST1/DSE/CHPF	18
BP	GO:0038083	peptidyl-tyrosine autophosphorylation	7/1293	21/18862	0.000346248	0.0171062	0.0147126	PTK2B/GREM1/KDR/NTRK1/TEC/IGF1R/DDR1	7
BP	GO:0042088	T-helper 1 type immune response	10/1293	41/18862	0.000349289	0.0171062	0.0147126	TLR4/SPN/IL1B/PLA2G4A/IL18R1/IL12RB1/IL1R1/EBI3/SOCS5/MTOR	10
BP	GO:0060560	developmental growth involved in morphogenesis	30/1293	225/18862	0.000355479	0.0171062	0.0147126	NRCAM/ISLR2/WNT5A/LPAR3/CXCL12/NIN/SEMA6A/NRP1/TIAM1/FMN1/CACNG7/SEMA3F/TGFBR2/LRP1/RIMS2/SEMA7A/DIP2B/SEMA3B/MEGF8/MACF1/ITGA4/CRABP2/WNT7B/SFRP1/SPG11/DDR1/YAP1/SEMA3D/EPB41L5/LHX1	30
BP	GO:0022617	extracellular matrix disassembly	15/1293	81/18862	0.000356526	0.0171062	0.0147126	DPP4/CTSS/MMP9/MMP16/MMP14/MMP2/LCP1/SCUBE3/LRP1/TIMP1/FAP/IL6/DDR1/LAMC1/FURIN	15
BP	GO:0038127	ERBB signaling pathway	22/1293	145/18862	0.000357277	0.0171062	0.0147126	PTK2B/FAM83A/MMP9/AREG/ITGA1/KIF16B/PTPRR/REPS2/SH3TC2/ARAP1/GAREM1/SH3KBP1/RASSF2/SOS1/PLCE1/PLCG1/PTPN12/EPS15/CBLB/SOCS5/CCDC88A/SNX6	22
BP	GO:0010959	regulation of metal ion transport	32/1293	247/18862	0.000386925	0.0183674	0.0157973	PTK2B/EHD3/JPH4/STC1/F2R/AKAP6/LPAR3/PDE4D/SLC8A1/CXCL12/TRPV3/PDE4B/WNK3/TRPC3/DMD/BEST1/PACSIN3/P2RY6/NOS1AP/SNCA/ATP2B1/CACNA2D1/PLCG1/CORO1A/LGALS3/EPB41/HTT/BCL2/PKD2/STIM2/PLCG2/FMR1	32
BP	GO:0051928	positive regulation of calcium ion transport	19/1293	118/18862	0.000412489	0.0192534	0.0165593	EHD3/STC1/F2R/AKAP6/LPAR3/CXCL12/TRPV3/WNK3/TRPC3/P2RY6/SNCA/ATP2B1/CACNA2D1/PLCG1/LGALS3/HTT/PKD2/STIM2/PLCG2	19
BP	GO:0001763	morphogenesis of a branching structure	26/1293	186/18862	0.000412522	0.0192534	0.0165593	GREM1/TIE1/KDR/WNT5A/NOTCH4/TGM2/EDNRA/MMP14/LAMA1/HOXB13/DCHS1/NRP1/LAMA5/FAT4/TGFBR2/NFATC4/FGF2/LGR4/SFRP1/DDR1/BCL2/PKD2/FKBPL/YAP1/LHX1/PDGFA	26
BP	GO:0048732	gland development	47/1293	413/18862	0.000434965	0.0200331	0.0172299	PLAG1/IGSF3/WNT5A/NOTCH4/TGM2/OAS2/LAMA1/HOXB13/ARHGAP5/LAMA5/ITGA2/XDH/FOXE1/PITX1/JARID2/SULF2/QDPR/CLDN1/TGFBR2/ATP7A/ZBTB7B/SERPINE2/STRA6/IL6/ROBO1/NF1/NCOA1/GNPNAT1/PRKDC/WNT7B/SLC29A1/TNFRSF11A/SFRP1/DDR1/BCL2/CSF1R/PKD2/RAG1/NOTCH2/IGF2R/CAD/MAN2A1/PRMT5/TGFBR3/CTC1/JAK2/PDGFA	47
BP	GO:0016049	cell growth	52/1293	470/18862	0.000436444	0.0200331	0.0172299	PTK2B/NRCAM/PRKCQ/GREM1/ISLR2/AKAP6/WNT5A/LPAR3/SFN/INHBA/KRT17/CXCL12/NIN/SEMA6A/MMP14/NRP1/TIAM1/IGFBP4/CACNG7/SEMA3F/NANOS1/ESR2/TGFBR2/LRP1/RIMS2/AKAP13/SEMA7A/DIP2B/SEMA3B/ARHGEF11/SERPINE2/MEGF8/KIAA1109/MACF1/ITGA4/SIPA1/ITCH/PLCE1/CRABP2/ENPP1/PAPPA2/SFRP1/N6AMT1/SPG11/DDR1/EXTL3/BCL2/EPB41L3/MTOR/SEMA3D/EPB41L5/KMT2D	52
BP	GO:0061081	positive regulation of myeloid leukocyte cytokine production involved in immune response	6/1293	16/18862	0.000451483	0.0203769	0.0175256	TLR4/LAPTM5/CD74/WNT5A/SEMA7A/MAVS	6
BP	GO:1905153	regulation of membrane invagination	6/1293	16/18862	0.000451483	0.0203769	0.0175256	F2RL1/C3/ITGA2/SYT11/APPL2/ABCA7	6
BP	GO:0016570	histone modification	50/1293	448/18862	0.000456652	0.0203769	0.0175256	IL1B/NAP1L2/HR/TRERF1/OTUB2/PRDM5/EYA4/SETDB2/BRMS1L/HMGA2/MAP3K12/JARID2/MTHFR/TET2/ZBTB7B/KMT2C/TET1/AASS/ZNF335/HUWE1/KAT14/NCOA1/HCFC1/SNCA/KDM5D/DDB2/N6AMT1/GFI1/EP400/NAA40/KANSL3/RCOR2/JADE2/PAGR1/HDAC7/PRKAA2/RAG1/MCM3AP/BAZ1A/FBXL19/ARID4A/TAF6L/PRMT5/FMR1/KMT2D/UFL1/TRRAP/PHF8/DMAP1/JAK2	50
BP	GO:0010810	regulation of cell-substrate adhesion	29/1293	218/18862	0.000459276	0.0203769	0.0175256	PTK2B/GREM1/ANGPT2/KDR/THBS1/MMP14/NRP1/FMN1/PLAU/LRP1/CASK/CARMIL1/PREX1/COL16A1/EMILIN1/UTRN/MACF1/NF1/RAC2/DOCK5/ATXN3/HAS2/SFRP1/DDR1/BCL2/UNC13D/EPB41L5/FERMT2/JAK2	29
BP	GO:0072006	nephron development	21/1293	138/18862	0.000462278	0.0203769	0.0175256	GREM1/SERPINB7/ANGPT2/GPR4/DCHS1/LAMA5/FMN1/SULF2/FAT4/PDGFD/FGF2/AQP11/PLCE1/LGR4/WNT7B/PODXL/BCL2/PKD2/NOTCH2/YAP1/LHX1	21
BP	GO:0060343	trabecula formation	7/1293	22/18862	0.000477963	0.0207498	0.0178463	GREM1/RBP4/MMP2/FBN2/SFRP1/ADGRG6/TGFBR3	7
BP	GO:0030865	cortical cytoskeleton organization	12/1293	58/18862	0.000478209	0.0207498	0.0178463	FHOD3/RHOF/LCP1/RTKN/RAC2/FMNL3/EPB41/PPP2R3C/FMNL2/EPB41L1/EPB41L3/FHOD1	12
BP	GO:0030203	glycosaminoglycan metabolic process	23/1293	158/18862	0.000486854	0.0209021	0.0179773	LUM/NDST3/IL1B/B3GNT7/CSGALNACT1/CHSY3/B4GALT6/VCAN/CHST11/FUCA1/FGF2/SLC10A7/NDST1/ARSB/SDC3/B4GAT1/HAS2/GLCE/IDS/HPSE/HS2ST1/DSE/CHPF	23
BP	GO:0030210	heparin biosynthetic process	5/1293	11/18862	0.000489246	0.0209021	0.0179773	NDST3/CSGALNACT1/SLC10A7/NDST1/GLCE	5
BP	GO:0002367	cytokine production involved in immune response	16/1293	93/18862	0.000544375	0.022994	0.0197765	F2RL1/TLR4/INAVA/LAPTM5/CD74/IL1B/WNT5A/IL18R1/TNFRSF14/IL1R1/LACC1/TLR3/SEMA7A/IL6/DENND1B/MAVS	16
BP	GO:0070374	positive regulation of ERK1 and ERK2 cascade	28/1293	210/18862	0.000549848	0.022994	0.0197765	F2RL1/TLR4/PTK2B/CD74/PTPN22/KDR/F2R/NTRK1/NRP1/MAP3K12/GAREM1/PDGFD/LRP1/FGF2/SEMA7A/TNFAIP8L3/P2RY6/BMPER/TIRAP/TNFRSF11A/PDGFC/CSF1R/NOTCH2/DNAJC27/FERMT2/RAPGEF2/ABCA7/PDGFA	28
BP	GO:1903829	positive regulation of cellular protein localization	36/1293	295/18862	0.000550631	0.022994	0.0197765	SFN/ABCA12/ABLIM3/ATP2B4/MAP1A/LRP4/CEP250/SORL1/WNK3/STOM/LRP1/ANK3/SSH1/SPTBN1/CASP8/RNF31/SLC5A3/SYT11/HUWE1/RAC2/NGFR/SORBS1/HPS4/LIMK2/LGALS3/EPB41/MAVS/BCL2/PRKAA2/APC/YAP1/FERMT2/DMAP1/CCDC88A/JAK2/ABCA7	36
BP	GO:0043277	apoptotic cell clearance	11/1293	51/18862	0.000561299	0.0232646	0.0200092	C3/XKR4/MERTK/TGM2/THBS1/ITGB3/PEAR1/LRP1/RAC2/SPG11/ABCA7	11
BP	GO:0007492	endoderm development	14/1293	76/18862	0.000586004	0.0239548	0.0206029	MMP9/DUSP4/INHBA/COL7A1/KIF16B/LAMB3/MMP14/MMP2/HMGA2/SOX7/ITGA4/LAMC1/EPB41L5/LHX1	14
BP	GO:0090287	regulation of cellular response to growth factor stimulus	36/1293	296/18862	0.000586578	0.0239548	0.0206029	GREM1/IL1B/WNT5A/THBS1/HTRA3/SEMA6A/ATP2B4/ITGB3/ADAMTS12/NRROS/SORL1/XDH/SULF2/CHST11/TGFBR2/CASK/FGF2/ZDHHC17/LTBP1/EMILIN1/SPRED3/SPRY3/ROBO1/FBN2/BCL9L/BMPER/NGFR/PMEPA1/SFRP1/CD109/JCAD/NOTCH2/TGFBR3/NEDD4/TRIM33/SNX6	36
BP	GO:0007163	establishment or maintenance of cell polarity	28/1293	212/18862	0.000640151	0.0259518	0.0223204	PTK2B/SPN/WNT5A/RHOF/FEZ1/LIN7A/LAMA1/CYP26B1/SYNJ2BP/DST/PARD6B/ARHGEF11/DLG3/CDC42BPB/RAC2/TCIRG1/MYO18A/OPHN1/SDCCAG8/ANK1/WNT7B/ARFGEF1/HTT/PATJ/SNX27/GBF1/CYTH1/MYO9A	28
BP	GO:0006895	Golgi to endosome transport	6/1293	17/18862	0.000657464	0.0264111	0.0227155	KIF16B/AP4M1/DOP1A/VPS13C/EPS15/GBF1	6
BP	GO:0032722	positive regulation of chemokine production	12/1293	60/18862	0.000660992	0.0264111	0.0227155	TLR4/CD74/IL1B/LPL/WNT5A/LRP1/TLR3/IL6/TIRAP/MAVS/CSF1R/IL7	12
BP	GO:0051496	positive regulation of stress fiber assembly	11/1293	52/18862	0.000668414	0.0265169	0.0228065	NOX4/NRP1/RAPGEF3/CARMIL1/ARHGEF10/SFRP1/MTOR/PXN/FHOD1/FERMT2/CCDC88A	11
BP	GO:0035335	peptidyl-tyrosine dephosphorylation	17/1293	104/18862	0.000681914	0.0268606	0.0231021	PTPRU/PTPN22/DUSP4/PTPRN/PTPRG/PTPRR/EYA4/TNS2/DUSP18/SSH1/DUSP19/PTPRE/PTPRK/PTPN12/PTPRM/MTM1/PTPN14	17
BP	GO:0034637	cellular carbohydrate biosynthetic process	15/1293	86/18862	0.000691421	0.0270333	0.0232506	NDST3/B3GNT7/CSGALNACT1/B3GNT8/IRS1/AKR1B1/PPP1R3E/NDST1/PPP1R3D/SORBS1/PGM2L1/ENPP1/HAS2/MTOR/HS2ST1	15
BP	GO:0048846	axon extension involved in axon guidance	9/1293	37/18862	0.000700899	0.0270333	0.0232506	WNT5A/CXCL12/SEMA6A/NRP1/SEMA3F/SEMA7A/SEMA3B/MEGF8/SEMA3D	9
BP	GO:1902284	neuron projection extension involved in neuron projection guidance	9/1293	37/18862	0.000700899	0.0270333	0.0232506	WNT5A/CXCL12/SEMA6A/NRP1/SEMA3F/SEMA7A/SEMA3B/MEGF8/SEMA3D	9
BP	GO:0050768	negative regulation of neurogenesis	20/1293	133/18862	0.000728586	0.0279073	0.0240023	IL1B/WNT5A/SEMA6A/NRP1/LRP4/SEMA3F/SORL1/NFATC4/SEMA7A/DIP2B/SEMA3B/IL6/NF1/NGFR/PPP3CA/SEMA3D/DLL3/APPL2/DICER1/RAPGEF2	20
BP	GO:0008286	insulin receptor signaling pathway	21/1293	143/18862	0.000746987	0.028197	0.0242515	PRKCQ/IL1B/RARRES2/IRS1/INSRR/TNS2/SORL1/PID1/ZBTB7B/PTPRE/SOS1/TCIRG1/SORBS1/ENPP1/PIP4K2A/IGF1R/CCND3/PHIP/APC/ATP6V1D/PIK3R3	21
BP	GO:0060401	cytosolic calcium ion transport	24/1293	173/18862	0.000753642	0.028197	0.0242515	PTK2B/JPH4/F2R/AKAP6/PDE4D/SLC8A1/GRIN2D/TRPV3/TRPM2/ATP2B4/ERO1A/TRPC3/FGF2/DMD/P2RY6/SNCA/ATP2B1/CACNA2D1/PLCG1/CORO1A/HTT/BCL2/PKD2/PLCG2	24
BP	GO:0007034	vacuolar transport	22/1293	153/18862	0.000756492	0.028197	0.0242515	EHD3/LAPTM5/CACNG7/SORL1/SLC46A3/ATP13A2/LRP1/HOOK1/ARSB/AP4M1/VIPAS39/VPS13D/AP1G2/VPS13C/LYST/SNX27/MTM1/IGF2R/DENND3/KIF13A/CHMP4C/NEDD4	22
BP	GO:0030217	T cell differentiation	31/1293	246/18862	0.000758803	0.028197	0.0242515	SPN/CD74/IL1B/PTPN22/IL18R1/IL12RB1/CYP26B1/CAMK4/PRDM1/VNN1/TGFBR2/ATP7A/PREX1/ZBTB7B/FOXP1/TCF7/IL7R/SOS2/IL6/SOS1/NFKBID/TCIRG1/PRKDC/PIK3CD/BCL2/IL7/SOCS5/JAG2/LEPR/MTOR/RAG1	31
BP	GO:0006892	post-Golgi vesicle-mediated transport	17/1293	105/18862	0.000762705	0.028197	0.0242515	EHD3/LAPTM5/STEAP2/KIF16B/SORL1/ANK3/SPTBN1/AP4M1/MACF1/DOP1A/SCFD1/AP1G2/VPS13C/EPS15/GBF1/MYO1B/KIF13A	17
BP	GO:0000271	polysaccharide biosynthetic process	14/1293	78/18862	0.00076803	0.028197	0.0242515	NDST3/B3GNT7/CSGALNACT1/B3GNT8/IRS1/PPP1R3E/NDST1/PPP1R3D/SORBS1/PGM2L1/ENPP1/HAS2/MTOR/HS2ST1	14
BP	GO:0033619	membrane protein proteolysis	12/1293	61/18862	0.000772344	0.028197	0.0242515	PRKCQ/TIMP3/IL1B/ADAM19/APH1B/TIMP1/PACSIN3/NGFR/ERAP1/SH3D19/MBTPS2/FURIN	12
BP	GO:0048661	positive regulation of smooth muscle cell proliferation	16/1293	96/18862	0.000780195	0.028197	0.0242515	MMP9/TGM2/THBS1/MAP3K5/ITGA2/MMP2/AKR1B1/PDGFD/TGFBR2/FGF2/FOXP1/IL6/P2RY6/LDLRAP1/MTOR/JAK2	16
BP	GO:0030202	heparin metabolic process	5/1293	12/18862	0.000791464	0.028197	0.0242515	NDST3/CSGALNACT1/SLC10A7/NDST1/GLCE	5
BP	GO:0031581	hemidesmosome assembly	5/1293	12/18862	0.000791464	0.028197	0.0242515	LAMC2/LAMB3/DST/COL17A1/LAMC1	5
BP	GO:0001706	endoderm formation	11/1293	53/18862	0.000791995	0.028197	0.0242515	MMP9/DUSP4/INHBA/COL7A1/LAMB3/MMP14/MMP2/HMGA2/SOX7/ITGA4/LHX1	11
BP	GO:0030595	leukocyte chemotaxis	29/1293	226/18862	0.000827685	0.02928	0.0251829	F2RL1/PTK2B/CXCL5/DPP4/FLT1/CXCL6/GREM1/CD74/RARRES2/WNT5A/THBS1/CXCL12/ITGA1/TRPM2/MTUS1/PDE4B/CXCL1/PREX1/SLC12A2/IL6/RAC2/PIK3CD/TIRAP/CORO1A/LGALS3/TNFRSF11A/LYST/CSF1R/GBF1	29
BP	GO:0001952	regulation of cell-matrix adhesion	19/1293	125/18862	0.000856129	0.0296774	0.0255247	PTK2B/GREM1/KDR/THBS1/MMP14/NRP1/FMN1/PLAU/LRP1/CASK/COL16A1/UTRN/MACF1/NF1/SFRP1/DDR1/BCL2/EPB41L5/FERMT2	19
BP	GO:0007223	Wnt signaling pathway, calcium modulating pathway	9/1293	38/18862	0.000863241	0.0296774	0.0255247	WNT5A/GNG2/TNRC6B/MOV10/FZD3/TNRC6A/PPP3CA/AGO1/AGO4	9
BP	GO:0030866	cortical actin cytoskeleton organization	9/1293	38/18862	0.000863241	0.0296774	0.0255247	FHOD3/LCP1/RTKN/FMNL3/EPB41/FMNL2/EPB41L1/EPB41L3/FHOD1	9
BP	GO:0016569	covalent chromatin modification	50/1293	461/18862	0.000869765	0.0296774	0.0255247	IL1B/NAP1L2/HR/TRERF1/OTUB2/PRDM5/EYA4/SETDB2/BRMS1L/HMGA2/MAP3K12/JARID2/MTHFR/TET2/ZBTB7B/KMT2C/TET1/AASS/ZNF335/HUWE1/KAT14/NCOA1/HCFC1/SNCA/KDM5D/DDB2/N6AMT1/GFI1/EP400/NAA40/KANSL3/RCOR2/JADE2/PAGR1/HDAC7/PRKAA2/RAG1/MCM3AP/BAZ1A/FBXL19/ARID4A/TAF6L/PRMT5/FMR1/KMT2D/UFL1/TRRAP/PHF8/DMAP1/JAK2	50
BP	GO:1903706	regulation of hemopoiesis	46/1293	415/18862	0.000874509	0.0296774	0.0255247	TLR4/PTK2B/PRKCQ/CSF3/CD74/IL12RB1/THBS1/INHBA/GPR68/MMP14/CSF2/CYP26B1/CAMK4/MEIS1/PRDM1/TNRC6B/VNN1/TGFBR2/ZBTB7B/KMT2C/RASSF2/TLR3/CASP8/FOXP1/TCF7/IL7R/SOS2/MOV10/SOS1/NFKBID/ACIN1/TCIM/PRKDC/TNRC6A/LGALS3/SFRP1/PPP2R3C/IL7/SOCS5/MTOR/RAG1/AGO1/NOTCH2/AGO4/KMT2D/MITF	46
BP	GO:0001776	leukocyte homeostasis	14/1293	79/18862	0.000875625	0.0296774	0.0255247	CXCL6/CD74/MERTK/PDE4B/DOCK10/SOS2/IL6/SOS1/TCIRG1/PIK3CD/CORO1A/PPP2R3C/BCL2/RAG1	14
BP	GO:0009101	glycoprotein biosynthetic process	40/1293	347/18862	0.000876322	0.0296774	0.0255247	NDST3/B3GNT7/CSGALNACT1/B3GNT8/CYTL1/CHSY3/MAN1A1/B4GALT6/TMTC3/GXYLT2/VCAN/TMTC1/ENTPD5/CHST11/TET2/ATP7A/FUT8/NDST1/TET1/KRTCAP2/GALNT1/ALG10/SRD5A3/ALG9/AQP11/B4GAT1/ARFGEF1/GXYLT1/EXTL3/BCL2/GLCE/EDEM3/HS2ST1/DSE/FAM20B/MGAT5/TNIP1/MAN2A1/ABCA7/CHPF	40
BP	GO:0010634	positive regulation of epithelial cell migration	24/1293	175/18862	0.00088862	0.0299115	0.025726	PTK2B/KDR/MMP9/WNT5A/THBS1/ITGB3/NRP1/SRPX2/ITGA2/TGFBR2/FGF2/FOXP1/SASH1/PLPP3/PIK3CD/EMC10/DOCK5/PLCG1/HAS2/HDAC7/MTOR/JCAD/PLCG2/EPB41L5	24
BP	GO:0050919	negative chemotaxis	10/1293	46/18862	0.00092882	0.0308916	0.026569	DPP4/WNT5A/SEMA6A/ITGB3/SEMA3F/SEMA7A/SEMA3B/ROBO1/SEMA3D/PDGFA	10
BP	GO:0048872	homeostasis of number of cells	31/1293	249/18862	0.000928862	0.0308916	0.026569	CXCL6/CD74/MERTK/F2R/ADGRF5/INHBA/PDE4B/L3MBTL3/DOCK10/SLC11A2/RASSF2/IL7R/SOS2/IL6/SOS1/EPAS1/ACIN1/GPRASP2/TCIRG1/PRKDC/PIK3CD/LGR4/CORO1A/PPP2R3C/BCL2/IL7/RAG1/ARID4A/UFL1/TGFBR3/JAK2	31
BP	GO:2000027	regulation of animal organ morphogenesis	24/1293	176/18862	0.00096363	0.0318572	0.0273995	GREM1/WNT5A/PRICKLE2/VANGL2/CTHRC1/GRHL3/TIAM1/TNFRSF11B/CELSR2/ROBO1/PSMA6/FZD3/NGFR/ANKRD6/DAAM1/CELSR3/LGR4/SFRP1/PSME2/PSMB9/ARHGEF19/PSME1/LHX1/PDGFA	24
BP	GO:2001257	regulation of cation channel activity	24/1293	177/18862	0.00104406	0.0343118	0.0295106	PTK2B/EHD3/CTSS/JPH4/MMP9/AKAP6/PDE4D/NETO1/PDE4B/RASGRF1/CACNG7/STOM/ANK3/DMD/DLG3/NETO2/P2RY6/NOS1AP/CACNA2D1/HTT/PKD2/STIM2/PLCG2/FMR1	24
BP	GO:0060071	Wnt signaling pathway, planar cell polarity pathway	17/1293	108/18862	0.00105589	0.0344891	0.0296631	WNT5A/PRICKLE2/VANGL2/CTHRC1/GRHL3/TIAM1/CELSR2/PSMA6/FZD3/ANKRD6/DAAM1/CELSR3/SFRP1/PSME2/PSMB9/ARHGEF19/PSME1	17
BP	GO:0007156	homophilic cell adhesion via plasma membrane adhesion molecules	23/1293	167/18862	0.00106187	0.0344891	0.0296631	CADM3/PCDHGA4/PCDH1/PCDHB8/PCDHGC5/DCHS1/PCDHB3/PCDHGC3/FAT4/PCDHAC2/DSG2/PCDHB2/CDH24/DSC2/CELSR2/ROBO1/PCDHGA11/HMCN1/CELSR3/PTPRM/PLXNB3/NECTIN3/PLXNB2	23
BP	GO:0110053	regulation of actin filament organization	33/1293	273/18862	0.00107882	0.034836	0.0299615	F2RL1/PTK2B/TMSB4Y/TENM1/CSF3/FHOD3/CXCL12/NOX4/NRP1/FMN1/VILL/PLEKHG2/ARAP1/RAPGEF3/PLEKHH2/CARMIL1/PREX1/SSH1/ARHGEF10/ASAP3/SPTBN1/ARHGAP18/ALMS1/ARFGEF1/CFL2/CORO1A/SFRP1/SPTBN2/MTOR/PXN/FHOD1/FERMT2/CCDC88A	33
BP	GO:0015012	heparan sulfate proteoglycan biosynthetic process	7/1293	25/18862	0.00112369	0.0354323	0.0304744	NDST3/CSGALNACT1/NDST1/EXTL3/GLCE/HS2ST1/DSE	7
BP	GO:0022011	myelination in peripheral nervous system	7/1293	25/18862	0.00112369	0.0354323	0.0304744	NDRG1/SH3TC2/ADAM22/ARHGEF10/NF1/ADGRG6/DICER1	7
BP	GO:0032292	peripheral nervous system axon ensheathment	7/1293	25/18862	0.00112369	0.0354323	0.0304744	NDRG1/SH3TC2/ADAM22/ARHGEF10/NF1/ADGRG6/DICER1	7
BP	GO:0051894	positive regulation of focal adhesion assembly	7/1293	25/18862	0.00112369	0.0354323	0.0304744	KDR/NRP1/FMN1/COL16A1/SFRP1/EPB41L5/FERMT2	7
BP	GO:0014910	regulation of smooth muscle cell migration	14/1293	81/18862	0.00112919	0.0354323	0.0304744	DOCK4/NOX4/NRP1/ITGA2/SORL1/PLAU/PDGFD/LRP1/ATP7A/SSH1/DOCK5/HAS2/BCL2/PDGFA	14
BP	GO:0051961	negative regulation of nervous system development	20/1293	138/18862	0.0011657	0.0363724	0.0312829	IL1B/WNT5A/SEMA6A/NRP1/LRP4/SEMA3F/SORL1/NFATC4/SEMA7A/DIP2B/SEMA3B/IL6/NF1/NGFR/PPP3CA/SEMA3D/DLL3/APPL2/DICER1/RAPGEF2	20
BP	GO:0050922	negative regulation of chemotaxis	12/1293	64/18862	0.00120426	0.0364407	0.0313417	DPP4/GREM1/ANGPT2/WNT5A/THBS1/SEMA6A/NRP1/SEMA3F/SEMA7A/SEMA3B/ROBO1/SEMA3D	12
BP	GO:0051893	regulation of focal adhesion assembly	12/1293	64/18862	0.00120426	0.0364407	0.0313417	GREM1/KDR/THBS1/MMP14/NRP1/FMN1/LRP1/COL16A1/MACF1/SFRP1/EPB41L5/FERMT2	12
BP	GO:0090109	regulation of cell-substrate junction assembly	12/1293	64/18862	0.00120426	0.0364407	0.0313417	GREM1/KDR/THBS1/MMP14/NRP1/FMN1/LRP1/COL16A1/MACF1/SFRP1/EPB41L5/FERMT2	12
BP	GO:0032905	transforming growth factor beta1 production	5/1293	13/18862	0.00121382	0.0364407	0.0313417	LUM/SERPINB7/THBS1/NRROS/FURIN	5
BP	GO:0060100	positive regulation of phagocytosis, engulfment	5/1293	13/18862	0.00121382	0.0364407	0.0313417	F2RL1/C3/ITGA2/APPL2/ABCA7	5
BP	GO:1902285	semaphorin-plexin signaling pathway involved in neuron projection guidance	5/1293	13/18862	0.00121382	0.0364407	0.0313417	NRP1/SEMA3F/PLXNA2/PLXNB3/PLXNB2	5
BP	GO:1905155	positive regulation of membrane invagination	5/1293	13/18862	0.00121382	0.0364407	0.0313417	F2RL1/C3/ITGA2/APPL2/ABCA7	5
BP	GO:0007098	centrosome cycle	19/1293	129/18862	0.00125925	0.0370289	0.0318475	NIN/CEP250/CCNF/PARD6B/ARHGEF10/HAUS4/CEP295/ALMS1/RTTN/SDCCAG8/PKD2/MDM1/PPP1R12A/CEP192/CEP76/KIF3A/MAP9/CHMP4C/CEP131	19
BP	GO:0061448	connective tissue development	30/1293	243/18862	0.00127303	0.0370289	0.0318475	LUM/SOX5/GREM1/STC1/SERPINB7/WNT5A/CSGALNACT1/CYTL1/PRRX1/GPR4/DGAT2/PTHLH/RUNX2/ADAMTS12/SORL1/SNX19/HMGA2/TRPS1/PITX1/SULF2/CHST11/PDGFD/EVC/TGFBR2/ATP7A/FGF2/TIMP1/WNT7B/TAPT1/OXCT1	30
BP	GO:0071526	semaphorin-plexin signaling pathway	9/1293	40/18862	0.00127946	0.0370289	0.0318475	SEMA6A/NRP1/SEMA3F/SEMA7A/SEMA3B/PLXNA2/PLXNB3/SEMA3D/PLXNB2	9
BP	GO:0032011	ARF protein signal transduction	6/1293	19/18862	0.00128008	0.0370289	0.0318475	PSD4/PSD3/ARFGEF3/ARFGEF1/GBF1/CYTH1	6
BP	GO:0032012	regulation of ARF protein signal transduction	6/1293	19/18862	0.00128008	0.0370289	0.0318475	PSD4/PSD3/ARFGEF3/ARFGEF1/GBF1/CYTH1	6
BP	GO:0034138	toll-like receptor 3 signaling pathway	6/1293	19/18862	0.00128008	0.0370289	0.0318475	F2RL1/PTPN22/COLEC12/TLR3/CASP8/TIRAP	6
BP	GO:0060044	negative regulation of cardiac muscle cell proliferation	6/1293	19/18862	0.00128008	0.0370289	0.0318475	RBP4/MEIS1/JARID2/TGFBR2/SAV1/KCNK2	6
BP	GO:0048588	developmental cell growth	28/1293	222/18862	0.0013142	0.037819	0.032527	NRCAM/ISLR2/AKAP6/WNT5A/LPAR3/CXCL12/NIN/SEMA6A/NRP1/TIAM1/CACNG7/SEMA3F/TGFBR2/LRP1/RIMS2/AKAP13/SEMA7A/DIP2B/SEMA3B/MEGF8/MACF1/ITGA4/CRABP2/SPG11/DDR1/MTOR/SEMA3D/KMT2D	28
BP	GO:0014812	muscle cell migration	16/1293	101/18862	0.00136551	0.039093	0.0336228	DOCK4/NOX4/ITGB3/NRP1/ITGA2/SORL1/PLAU/PDGFD/LRP1/ATP7A/SSH1/DOCK5/HAS2/DDR1/BCL2/PDGFA	16
BP	GO:0001935	endothelial cell proliferation	25/1293	191/18862	0.001382	0.0393622	0.0338543	FLT1/TIE1/KDR/WNT5A/THBS1/CXCL12/MMP14/ITGB3/NRP1/XDH/SYNJ2BP/FGF2/NF1/ITGA4/BMPER/NGFR/PIK3CD/EMC10/PLCG1/PTPRM/PLXNB3/MTOR/JCAD/VASH1/AGGF1	25
BP	GO:0030316	osteoclast differentiation	15/1293	92/18862	0.00141505	0.0398037	0.0342341	TLR4/SH3PXD2A/GPR68/CAMK4/RASSF2/TLR3/FOXP1/TCIRG1/TNFRSF11A/SFRP1/CD109/CSF1R/MTOR/NOTCH2/MITF	15
BP	GO:0043409	negative regulation of MAPK cascade	24/1293	181/18862	0.00142648	0.0398037	0.0342341	F2RL1/TLR4/TIMP3/IL1B/PTPN22/DUSP4/SEMA6A/PTPRR/SORL1/SYNJ2BP/DUSP18/DUSP19/EMILIN1/SPRED3/SPRY3/NF1/ITCH/PRDM15/IGF1R/SFRP1/RPS6KA6/PAQR3/TNIP1/ABCA7	24
BP	GO:0045785	positive regulation of cell adhesion	46/1293	425/18862	0.00142969	0.0398037	0.0342341	PTK2B/DPP4/PRKCQ/PTPRU/CD74/IL1B/PTPN22/KDR/WNT5A/TGM2/IL12RB1/CXCL12/TNFRSF14/NRP1/FMN1/ITGA2/ADAM19/VNN1/TGFBR2/ANK3/CARMIL1/FRMD5/PREX1/ZBTB7B/COL16A1/EMILIN1/UTRN/IL7R/IL6/NFKBID/ITGA4/PLPP3/DOCK5/HAS2/CORO1A/SFRP1/EBI3/PPP3CA/PODXL/IL7/UNC13D/SOCS5/RAG1/EPB41L5/FERMT2/JAK2	46
BP	GO:0007041	lysosomal transport	17/1293	111/18862	0.00143973	0.0398037	0.0342341	EHD3/LAPTM5/CACNG7/SORL1/ATP13A2/LRP1/HOOK1/ARSB/AP4M1/VIPAS39/LYST/SNX27/MTM1/IGF2R/DENND3/KIF13A/NEDD4	17
BP	GO:0043506	regulation of JUN kinase activity	14/1293	83/18862	0.00144161	0.0398037	0.0342341	PTK2B/PTPN22/WNT5A/TLR6/MAP3K5/TIAM1/MAP3K12/MAP3K9/DUSP19/MAP4K5/SASH1/TNFRSF11A/SFRP1/MAP3K4	14
BP	GO:1901019	regulation of calcium ion transmembrane transporter activity	14/1293	83/18862	0.00144161	0.0398037	0.0342341	EHD3/JPH4/AKAP6/PDE4D/PDE4B/DMD/P2RY6/NOS1AP/CACNA2D1/HTT/PKD2/STIM2/PLCG2/FMR1	14
BP	GO:0048843	negative regulation of axon extension involved in axon guidance	7/1293	26/18862	0.00144767	0.0398037	0.0342341	WNT5A/SEMA6A/NRP1/SEMA3F/SEMA7A/SEMA3B/SEMA3D	7
BP	GO:0001819	positive regulation of cytokine production	47/1293	437/18862	0.00145526	0.0398155	0.0342442	LUM/F2RL1/TLR4/C3/INAVA/PRKCQ/LAPTM5/POU2F2/SPN/SERPINB7/CD74/IL1B/PTPN22/F2R/LPL/WNT5A/PDE4D/TLR6/IL18R1/IL12RB1/THBS1/CSF2/TNFRSF14/IL1R1/PDE4B/SORL1/SULF2/LRP1/NFATC4/TLR3/SEMA7A/SPTBN1/CASP8/IL6/GBP5/PRKDC/TIRAP/EBI3/MAVS/GLMN/CSF1R/IL7/POLR3B/PLCG2/HPSE/FURIN/JAK2	47
BP	GO:0043542	endothelial cell migration	33/1293	278/18862	0.00146476	0.0398788	0.0342986	PRSS3/PTK2B/DPP4/GREM1/STC1/ANGPT2/KDR/WNT5A/LPXN/THBS1/ATP2B4/ITGB3/NRP1/SRPX2/SYNJ2BP/FGF2/FAP/FOXP1/SASH1/ROBO1/NF1/BMPER/PLPP3/PIK3CD/EMC10/STARD13/PLCG1/PTPRM/HDAC7/JCAD/VASH1/PXN/PIK3R3	33
BP	GO:1901653	cellular response to peptide	43/1293	391/18862	0.00147695	0.0400146	0.0344154	TLR4/PRKCQ/IL1B/RARRES2/PTPN22/LPL/TLR6/CYP11A1/IRS1/INSRR/TNS2/SORL1/AKR1B1/PID1/LRP1/GDF15/ZBTB7B/ARID1B/PTPRE/SOS1/ITGA4/TCIRG1/NGFR/SORBS1/PRKDC/ATP2B1/CACNA2D1/ENPP1/PIP4K2A/IGF1R/LPIN2/CCND3/PRKAR2B/MBD5/PHIP/APC/ATP6V1D/PXN/ADCY9/PIK3R3/APPL2/JAK2/SNX6	43
BP	GO:0061041	regulation of wound healing	19/1293	131/18862	0.00151514	0.0407483	0.0350465	F2RL1/F2R/THBS1/SERPINB2/PLAU/CLDN1/CASK/FGF2/FAP/SERPINE2/SLC12A2/PLPP3/ARFGEF1/CD109/MTOR/HPSE/FERMT2/ENPP4/PDGFA	19
BP	GO:0044264	cellular polysaccharide metabolic process	16/1293	102/18862	0.00151871	0.0407483	0.0350465	NDST3/B3GNT7/CSGALNACT1/B3GNT8/IRS1/PPP1R3E/NDST1/PPP1R3D/SORBS1/PGM2L1/ENPP1/HAS2/PHKA1/LEPR/MTOR/HS2ST1	16
BP	GO:0043473	pigmentation	15/1293	93/18862	0.00158249	0.0418884	0.036027	GPR143/SHROOM2/RAB27B/MLPH/ATP7A/HPS5/SZT2/NF1/HPS4/ENPP1/LYST/BCL2/SHROOM3/MITF/KIF13A	15
BP	GO:0042110	T cell activation	50/1293	474/18862	0.00158569	0.0418884	0.036027	F2RL1/DPP4/PRKCQ/LAPTM5/SPN/CD74/IL1B/PTPN22/IL18R1/IL12RB1/CYP26B1/TNFRSF14/CAMK4/PRDM1/ARG2/LCP1/TNFRSF21/VNN1/TGFBR2/ATP7A/PREX1/ZBTB7B/CASP8/FOXP1/TCF7/IL7R/SOS2/IL6/SOS1/NFKBID/RAC2/TCIRG1/PRKDC/PIK3CD/CORO1A/LGALS3/CCND3/EBI3/PPP3CA/GLMN/BCL2/IL7/CBLB/SOCS5/JAG2/LEPR/MTOR/RAG1/KIF13B/IFNE	50
BP	GO:0051209	release of sequestered calcium ion into cytosol	17/1293	112/18862	0.00159137	0.0418884	0.036027	PTK2B/JPH4/F2R/AKAP6/PDE4D/SLC8A1/TRPM2/ERO1A/FGF2/DMD/P2RY6/SNCA/PLCG1/CORO1A/HTT/PKD2/PLCG2	17
BP	GO:0090175	regulation of establishment of planar polarity	17/1293	112/18862	0.00159137	0.0418884	0.036027	WNT5A/PRICKLE2/VANGL2/CTHRC1/GRHL3/TIAM1/CELSR2/PSMA6/FZD3/ANKRD6/DAAM1/CELSR3/SFRP1/PSME2/PSMB9/ARHGEF19/PSME1	17
BP	GO:0001558	regulation of cell growth	44/1293	406/18862	0.00174805	0.0454848	0.0391203	PTK2B/NRCAM/PRKCQ/GREM1/ISLR2/AKAP6/WNT5A/LPAR3/SFN/INHBA/KRT17/CXCL12/SEMA6A/MMP14/NRP1/IGFBP4/CACNG7/SEMA3F/NANOS1/ESR2/LRP1/RIMS2/SEMA7A/DIP2B/SEMA3B/ARHGEF11/SERPINE2/MEGF8/KIAA1109/MACF1/SIPA1/ITCH/PLCE1/CRABP2/ENPP1/PAPPA2/SFRP1/N6AMT1/DDR1/EXTL3/BCL2/EPB41L3/MTOR/SEMA3D	44
BP	GO:0051283	negative regulation of sequestering of calcium ion	17/1293	113/18862	0.00175623	0.0454848	0.0391203	PTK2B/JPH4/F2R/AKAP6/PDE4D/SLC8A1/TRPM2/ERO1A/FGF2/DMD/P2RY6/SNCA/PLCG1/CORO1A/HTT/PKD2/PLCG2	17
BP	GO:0009415	response to water	5/1293	14/18862	0.00178219	0.0454848	0.0391203	NTRK1/ATP2B4/AKR1B1/SIPA1/PKD2	5
BP	GO:0010935	regulation of macrophage cytokine production	5/1293	14/18862	0.00178219	0.0454848	0.0391203	TLR4/LAPTM5/CD74/WNT5A/SEMA7A	5
BP	GO:0045217	cell-cell junction maintenance	5/1293	14/18862	0.00178219	0.0454848	0.0391203	F2RL1/INAVA/F2R/CSF1R/FERMT2	5
BP	GO:0001736	establishment of planar polarity	18/1293	123/18862	0.00179734	0.0454848	0.0391203	WNT5A/PRICKLE2/VANGL2/CTHRC1/GRHL3/ASTN2/TIAM1/CELSR2/PSMA6/FZD3/ANKRD6/DAAM1/CELSR3/SFRP1/PSME2/PSMB9/ARHGEF19/PSME1	18
BP	GO:0007164	establishment of tissue polarity	18/1293	123/18862	0.00179734	0.0454848	0.0391203	WNT5A/PRICKLE2/VANGL2/CTHRC1/GRHL3/ASTN2/TIAM1/CELSR2/PSMA6/FZD3/ANKRD6/DAAM1/CELSR3/SFRP1/PSME2/PSMB9/ARHGEF19/PSME1	18
BP	GO:0002687	positive regulation of leukocyte migration	19/1293	133/18862	0.00181384	0.0454848	0.0391203	F2RL1/PTK2B/SPN/CD74/RARRES2/WNT5A/THBS1/CXCL12/MMP14/TNFRSF14/IL1R1/ITGA2/PDGFD/IL6/ITGA4/RAC2/TIRAP/LGALS3/CSF1R	19
BP	GO:0050918	positive chemotaxis	12/1293	67/18862	0.00181932	0.0454848	0.0391203	F2RL1/ANGPT2/KDR/WNT5A/CXCL12/NRP1/ITGA2/LRP1/FGF2/CORO1A/LGALS3/PLXNB3	12
BP	GO:0002360	T cell lineage commitment	7/1293	27/18862	0.00184008	0.0454848	0.0391203	SPN/IL12RB1/IL6/PRKDC/BCL2/IL7/MTOR	7
BP	GO:0033688	regulation of osteoblast proliferation	7/1293	27/18862	0.00184008	0.0454848	0.0391203	GREM1/MN1/CTHRC1/NPR3/SFRP1/BCL2/HPSE	7
BP	GO:0006509	membrane protein ectodomain proteolysis	9/1293	42/18862	0.00184393	0.0454848	0.0391203	PRKCQ/TIMP3/IL1B/ADAM19/TIMP1/PACSIN3/ERAP1/SH3D19/FURIN	9
BP	GO:0051279	regulation of release of sequestered calcium ion into cytosol	13/1293	76/18862	0.00184544	0.0454848	0.0391203	PTK2B/JPH4/F2R/AKAP6/PDE4D/SLC8A1/DMD/P2RY6/SNCA/PLCG1/CORO1A/HTT/PKD2	13
BP	GO:0030038	contractile actin filament bundle assembly	16/1293	104/18862	0.00186867	0.0454848	0.0391203	PTK2B/NOX4/NRP1/ARAP1/RAPGEF3/CARMIL1/ARHGEF10/ASAP3/ALMS1/SORBS1/SFRP1/MTOR/PXN/FHOD1/FERMT2/CCDC88A	16
BP	GO:0043149	stress fiber assembly	16/1293	104/18862	0.00186867	0.0454848	0.0391203	PTK2B/NOX4/NRP1/ARAP1/RAPGEF3/CARMIL1/ARHGEF10/ASAP3/ALMS1/SORBS1/SFRP1/MTOR/PXN/FHOD1/FERMT2/CCDC88A	16
BP	GO:0061387	regulation of extent of cell growth	16/1293	104/18862	0.00186867	0.0454848	0.0391203	NRCAM/ISLR2/WNT5A/LPAR3/CXCL12/SEMA6A/NRP1/SEMA3F/LRP1/SEMA7A/DIP2B/SEMA3B/MEGF8/MACF1/CRABP2/SEMA3D	16
BP	GO:0001894	tissue homeostasis	31/1293	260/18862	0.00186949	0.0454848	0.0391203	TLR4/PTK2B/INAVA/F2R/ADGRF5/CYTL1/RBP4/ABCA12/ITGB3/WNK3/NANOS1/AKR1B1/CLDN1/DMD/TNFRSF11B/SLC12A2/IL6/EPAS1/NF1/CLCN3/RAC2/TCIRG1/CORO1A/TNFRSF11A/BCL2/CSF1R/IL7/MDM1/LAMC1/YAP1/SPATA7	31
BP	GO:0060249	anatomical structure homeostasis	49/1293	466/18862	0.00187541	0.0454848	0.0391203	TLR4/PTK2B/INAVA/PRKCQ/F2R/ADGRF5/CYTL1/RBP4/CALB2/ABCA12/ITGB3/MAP1A/WNK3/SLX4/NANOS1/AKR1B1/CLDN1/DMD/TNFRSF11B/SLC12A2/IL6/EPAS1/NF1/CLCN3/POLE2/RAC2/TCIRG1/TINF2/PRKDC/ATP2B1/ZNF365/CFL2/CORO1A/TNFRSF11A/RAD50/BCL2/CSF1R/IL7/MDM1/MAP3K4/MTM1/SMARCAL1/DCP2/LAMC1/YAP1/CTC1/RAD51D/RFC5/SPATA7	49
BP	GO:1903034	regulation of response to wounding	22/1293	164/18862	0.00189958	0.0458707	0.0394521	F2RL1/F2R/THBS1/SERPINB2/PLAU/CLDN1/LRP1/ATP7A/CASK/FGF2/FAP/SERPINE2/SLC12A2/KREMEN1/PLPP3/ARFGEF1/CD109/MTOR/HPSE/FERMT2/ENPP4/PDGFA	22
BP	GO:0051216	cartilage development	24/1293	185/18862	0.00192345	0.0462462	0.0397751	LUM/SOX5/GREM1/STC1/WNT5A/CSGALNACT1/CYTL1/PRRX1/PTHLH/RUNX2/ADAMTS12/SNX19/HMGA2/TRPS1/PITX1/SULF2/CHST11/EVC/TGFBR2/ATP7A/FGF2/TIMP1/WNT7B/TAPT1	24
BP	GO:0032147	activation of protein kinase activity	37/1293	328/18862	0.00196646	0.0468179	0.0402667	TLR4/PTK2B/INAVA/GREM1/TNFSF15/CD74/IL1B/NRK/F2R/WNT5A/LPAR3/TLR6/THBS1/NTRK1/ITGA1/MAP3K5/ITGB3/TAB3/MAP3K12/TGFBR2/FGF2/GDF15/MAP3K9/TLR3/DUSP19/MAP4K5/ADORA2B/PLCE1/TIRAP/PPP2R3C/PRKAR2B/PDGFC/MAP3K4/MTOR/ADCY9/CCDC88A/JAK2	37
BP	GO:0010522	regulation of calcium ion transport into cytosol	15/1293	95/18862	0.00196732	0.0468179	0.0402667	PTK2B/JPH4/F2R/AKAP6/PDE4D/SLC8A1/TRPC3/DMD/P2RY6/SNCA/PLCG1/CORO1A/HTT/BCL2/PKD2	15
BP	GO:0007266	Rho protein signal transduction	19/1293	134/18862	0.00198095	0.0468179	0.0402667	F2RL1/F2R/GPR4/ARHGAP5/NRP1/RASGRF1/ARHGEF10/AKAP13/ARHGEF11/EPS8L2/ROBO1/RTKN/NGFR/OPHN1/STARD13/ARHGAP29/PRAG1/ARHGAP42/ARHGEF12	19
BP	GO:0090101	negative regulation of transmembrane receptor protein serine/threonine kinase signaling pathway	19/1293	134/18862	0.00198095	0.0468179	0.0402667	GREM1/WNT5A/HTRA3/NRROS/SORL1/CHST11/TGFBR2/LTBP1/EMILIN1/SPRED3/FBN2/BCL9L/BMPER/PMEPA1/SFRP1/CD109/TGFBR3/TRIM33/SNX6	19
BP	GO:0032755	positive regulation of interleukin-6 production	14/1293	86/18862	0.00204306	0.0480811	0.0413533	F2RL1/TLR4/INAVA/POU2F2/CD74/IL1B/F2R/LPL/WNT5A/TLR6/TLR3/IL6/TIRAP/MAVS	14
BP	GO:0097529	myeloid leukocyte migration	27/1293	218/18862	0.00206864	0.0484013	0.0416286	PTK2B/CXCL5/DPP4/FLT1/CXCL6/GREM1/CD74/RARRES2/THBS1/CXCL12/ITGA1/MMP14/MTUS1/IL1R1/PDE4B/PDGFD/CXCL1/PREX1/EMILIN1/IL6/RAC2/PIK3CD/TIRAP/LGALS3/TNFRSF11A/CSF1R/GBF1	27
BP	GO:0043507	positive regulation of JUN kinase activity	12/1293	68/18862	0.00207409	0.0484013	0.0416286	PTK2B/WNT5A/TLR6/MAP3K5/TIAM1/MAP3K12/MAP3K9/DUSP19/MAP4K5/SASH1/TNFRSF11A/MAP3K4	12
BP	GO:0071560	cellular response to transforming growth factor beta stimulus	30/1293	251/18862	0.00211191	0.0490776	0.0422103	SOX5/WNT5A/LPXN/THBS1/HTRA3/NOX4/NRROS/CHST11/CLDN1/PDGFD/TGFBR2/GDF15/FUT8/LTBP1/EMILIN1/SPRED3/PTPRK/FBN2/BCL9L/PMEPA1/SFRP1/CD109/PXN/EPB41L5/FERMT2/APPL2/TGFBR3/FURIN/TRIM33/SNX6	30
BP	GO:0051282	regulation of sequestering of calcium ion	17/1293	115/18862	0.00212927	0.0491287	0.0422542	PTK2B/JPH4/F2R/AKAP6/PDE4D/SLC8A1/TRPM2/ERO1A/FGF2/DMD/P2RY6/SNCA/PLCG1/CORO1A/HTT/PKD2/PLCG2	17
BP	GO:1904645	response to amyloid-beta	10/1293	51/18862	0.0021318	0.0491287	0.0422542	TLR4/MMP9/TLR6/MMP2/LRP1/ITGA4/NGFR/CACNA2D1/IGF1R/SNX6	10
BP	GO:1903169	regulation of calcium ion transmembrane transport	20/1293	145/18862	0.00214128	0.0491432	0.0422667	PTK2B/EHD3/JPH4/F2R/AKAP6/PDE4D/SLC8A1/PDE4B/DMD/P2RY6/NOS1AP/SNCA/CACNA2D1/PLCG1/CORO1A/HTT/PKD2/STIM2/PLCG2/FMR1	20
CC	GO:0005911	cell-cell junction	70/1347	485/19520	3.08956e-09	1.863e-06	1.6456e-06	DPP4/CADM3/PCDH1/PTPRU/SHROOM2/AKAP6/SLC8A1/VANGL2/ADGRL3/CALB2/STEAP1/NDRG1/LIN7A/GJD3/LAMA1/DCHS1/ITGB3/TIAM1/FMN1/SHROOM1/WNK3/NHS/PDLIM3/AKR1B1/CLDN1/SH3KBP1/CASK/ANK3/FRMD5/PARD6B/DSG2/COL17A1/KIRREL1/CDH24/DSC2/DNMBP/PTPRK/CDC42BPB/ARHGAP24/CDC42BPA/NGFR/SYNM/VSIG10/SORBS1/PLPP3/HMCN1/SDCCAG8/PLCG1/CORO1A/PPP3CA/PODXL/PDZD2/STRN/PTPRM/SAV1/PKD2/PATJ/ARVCF/EPB41L3/APC/SHROOM3/PDLIM4/JCAD/PXN…	70
CC	GO:0031252	cell leading edge	61/1347	411/19520	1.12024e-08	3.37754e-06	2.98339e-06	TLR4/PTK2B/DPP4/PSD4/SAMSN1/ABI3/RINL/ABLIM3/ITGB3/TIAM1/PSD3/NHS/RAPGEF3/LCP1/PLEKHH2/FGD4/DST/ATP7A/CARMIL1/SSH1/ASAP3/FAP/SPTBN1/EPS8L2/MACF1/PTPRK/ARAP3/ARHGAP18/CLCN3/CDC42BPB/RAC2/CDC42BPA/PLCE1/ATP2B1/AAK1/TIRAP/ANK1/PLCG1/CORO1A/PODXL/PTPRM/MYO6/PLEK2/PKD2/GABRA3/SYNE2/EPB41L3/MTM1/GBF1/APC/ITSN1/PDLIM4/JCAD/PXN/EPB41L5/MYH10/FERMT2/APPL2/CCDC88A/ABCA7/TRPM7	61
CC	GO:0030027	lamellipodium	31/1347	196/19520	1.229e-05	0.00247029	0.00218202	PTK2B/DPP4/ABI3/ABLIM3/ITGB3/NHS/RAPGEF3/PLEKHH2/FGD4/CARMIL1/SSH1/FAP/ARAP3/CDC42BPB/RAC2/CDC42BPA/PLCE1/PLCG1/CORO1A/PODXL/PTPRM/PLEK2/PKD2/SYNE2/APC/ITSN1/PDLIM4/PXN/MYH10/FERMT2/CCDC88A	31
CC	GO:0005769	early endosome	48/1347	378/19520	3.1429e-05	0.00473792	0.00418502	F2RL1/TLR4/EHD3/LAMP3/PARM1/KDR/F2R/STEAP2/KCNH1/NTRK1/KIF16B/ASTN2/NRP1/CACNG7/SORL1/SNX19/LRP1/SLC11A2/TLR3/LIPG/SNX15/AP4M1/VIPAS39/SNX13/CLCN3/LNPEP/EEA1/ITCH/WDR91/ATP9A/PMEPA1/CORO1A/SNX21/HTT/EPS15/LDLRAP1/SNX27/DNER/PDLIM4/ATP11A/NUMB/SAMD9L/IGF2R/MYO1B/DIAPH2/APPL2/ABCA7/SNX6	48
CC	GO:0045178	basal part of cell	36/1347	258/19520	4.28013e-05	0.00502443	0.00443809	SLC26A7/SLC4A4/ITGA1/LIN7A/ATP2B4/SLC38A3/SLC40A1/CLCA2/ITGA2/SYNJ2BP/GM2A/CLDN1/LRP1/DST/ATP7A/ANK3/SLC11A2/BEST1/FAP/SLC26A1/DLG3/SLC29A2/SLC12A2/SLC12A6/PLPP3/ATP2B1/SLC26A6/ANK1/ENPP1/SLC29A1/EPB41/EPS15/LDLRAP1/PKD2/LEPR/NUMB	36
CC	GO:0005912	adherens junction	27/1347	172/19520	4.99943e-05	0.00502443	0.00443809	SHROOM2/NDRG1/LIN7A/DCHS1/FMN1/SHROOM1/WNK3/PDLIM3/FRMD5/CDH24/DSC2/PTPRK/ARHGAP24/SYNM/SORBS1/PLPP3/HMCN1/PTPRM/ARVCF/APC/SHROOM3/PDLIM4/JCAD/EPB41L5/CYTH1/NECTIN3/FERMT2	27
CC	GO:0001726	ruffle	27/1347	175/19520	6.78808e-05	0.00584745	0.00516507	TLR4/PSD4/SAMSN1/RINL/ITGB3/TIAM1/PSD3/LCP1/FGD4/ASAP3/FAP/EPS8L2/MACF1/ARAP3/ARHGAP18/CLCN3/TIRAP/PLCG1/PODXL/MYO6/MTM1/APC/JCAD/EPB41L5/APPL2/ABCA7/TRPM7	27
CC	GO:0062023	collagen-containing extracellular matrix	50/1347	423/19520	0.000136776	0.00877959	0.00775503	LUM/SRPX/CTSS/GREM1/TIMP3/ANGPT2/RARRES2/MMP9/WNT5A/TGM2/COL4A5/COL25A1/THBS1/LAMC2/CXCL12/COL7A1/CTHRC1/LAMB3/LAMA1/COL4A6/SRPX2/LAMA5/COL8A2/COL9A3/MMP2/VCAN/ADAMTS15/ADAM19/COL6A3/ANXA8/DST/CASK/GDF15/TIMP1/COL17A1/SEMA7A/COL16A1/LTBP1/SEMA3B/EMILIN1/ATRNL1/SERPINE2/SDC3/FBN2/TINAGL1/HMCN1/LGALS3/SFRP1/IL7/LAMC1	50
CC	GO:0031256	leading edge membrane	26/1347	173/19520	0.000142524	0.00877959	0.00775503	DPP4/PSD4/ITGB3/TIAM1/PSD3/LCP1/FAP/SPTBN1/EPS8L2/MACF1/PTPRK/CLCN3/ATP2B1/TIRAP/ANK1/MYO6/PLEK2/GABRA3/SYNE2/EPB41L3/APC/JCAD/EPB41L5/FERMT2/APPL2/ABCA7	26
CC	GO:0031253	cell projection membrane	42/1347	337/19520	0.000145598	0.00877959	0.00775503	DPP4/EHD3/EVC2/PSD4/SYTL1/SLC26A2/ITGB3/TIAM1/PSD3/LCP1/EVC/ATP7A/CASK/SLC11A2/DMD/KIRREL1/FAP/TMEM17/SPTBN1/UTRN/EPS8L2/SLC12A2/TTC8/MACF1/CLCN3/ATP2B1/SLC26A6/TIRAP/ANK1/PODXL/MYO6/PLEK2/PKD2/GABRA3/SYNE2/EPB41L3/APC/JCAD/EPB41L5/FERMT2/APPL2/ABCA7	42
CC	GO:0009925	basal plasma membrane	32/1347	240/19520	0.000259706	0.0142366	0.0125753	SLC26A7/SLC4A4/LIN7A/ATP2B4/SLC38A3/SLC40A1/CLCA2/SYNJ2BP/GM2A/CLDN1/LRP1/DST/ATP7A/ANK3/BEST1/SLC26A1/DLG3/SLC29A2/SLC12A2/SLC12A6/PLPP3/ATP2B1/SLC26A6/ANK1/ENPP1/SLC29A1/EPB41/EPS15/LDLRAP1/PKD2/LEPR/NUMB	32
CC	GO:0005938	cell cortex	37/1347	301/19520	0.000459534	0.0199882	0.0176556	EXOC3L2/PTK2B/SHROOM2/RHOF/CD302/LAMC2/CALB2/ASTN2/SHROOM1/MLPH/RAPGEF3/PLEKHH2/DST/PARD6B/RIMS2/AKAP13/SPTBN1/UTRN/RTKN/RAC2/FLNB/SNCA/HMCN1/CORO1A/EPB41/ARHGAP32/MYO6/PKD2/DYNC1H1/SPTBN2/SHROOM3/RAI14/FRYL/PXN/MYH10/FERMT2/NEDD4	37
CC	GO:0030055	cell-substrate junction	48/1347	423/19520	0.000472112	0.0199882	0.0176556	PTK2B/DPP4/EHD3/FLT1/ITGA11/LPXN/TGM2/ITGA1/NOX4/MMP14/ITGB3/NRP1/TNS2/ITGA2/PLAU/NHS/LCP1/TNS3/SH3KBP1/LRP1/DST/CASK/DMD/COL17A1/ASAP3/PPFIBP1/FAP/GIT2/ITGA4/RAC2/ARHGAP24/FLNB/HMGA1/SORBS1/PROCR/ARHGAP26/PTPN12/MCAM/SYNE2/PPP1R12A/NUMB/IGF2R/PXN/PRAG1/EPB41L5/IRF2/FERMT2/JAK2	48
CC	GO:0042641	actomyosin	14/1347	74/19520	0.000472873	0.0199882	0.0176556	NOX4/ABLIM3/LCP1/PDLIM3/CDC42BPB/CDC42BPA/SORBS1/DAAM1/MYO18A/PDLIM4/PXN/MYH10/FHOD1/FERMT2	14
CC	GO:0097060	synaptic membrane	43/1347	368/19520	0.000497218	0.0199882	0.0176556	KCTD12/F2R/SLC8A1/GRIN2D/SHC4/KCNH1/IL31RA/CALB2/LIN7A/NETO1/LZTS1/ADGRL2/GABRQ/ATP2B4/ITGB3/TIAM1/RIMS4/SRPX2/LRFN5/CACNG7/LRP4/STXBP5/GRIK5/SYNJ2BP/ADAM22/CASK/ANK3/DMD/PRRT2/RIMS2/ZDHHC17/LRFN3/UTRN/SYT11/ATP2B1/ANK1/STRN/GABRA3/ITSN1/PDLIM4/ZNRF2/FMR1/NECTIN3	43
CC	GO:0044309	neuron spine	25/1347	178/19520	0.000542417	0.0204423	0.0180568	PTK2B/FRMPD4/SLC8A1/LZTS1/PDE4B/FBXO2/TIAM1/TANC2/DOCK10/SIPA1L1/PRRT2/ZMYND8/SYT11/NGFR/EEA1/ATP2B1/OPHN1/PPP3CA/PRKAR2B/STRN/ARHGAP32/ITSN1/PDLIM4/FMR1/NEDD4	25
CC	GO:0005604	basement membrane	16/1347	94/19520	0.000661582	0.0234667	0.0207282	COL4A5/LAMC2/COL7A1/LAMB3/LAMA1/COL4A6/LAMA5/COL8A2/COL9A3/DST/CASK/TIMP1/COL17A1/ATRNL1/HMCN1/LAMC1	16
CC	GO:0098978	glutamatergic synapse	37/1347	308/19520	0.000711028	0.0236617	0.0209005	PTK2B/SLITRK4/WNT5A/ACTBL2/ADGRL3/NDRG1/NETO1/ABLIM3/ADGRL2/ATP2B4/ITGB3/PLEKHA5/TIAM1/LRFN5/CACNG7/SEMA3F/GRIK5/CAMK4/ADAM22/LRFN3/USP46/CLCN3/NOS1AP/ATP2B1/DRP2/OPHN1/PLCG1/CORO1A/PPP3CA/PRKAR2B/EPS15/SPTBN2/ITSN1/MTOR/NUMB/PORCN/JAK2	37
CC	GO:0032587	ruffle membrane	16/1347	95/19520	0.00074556	0.0236617	0.0209005	PSD4/ITGB3/TIAM1/PSD3/LCP1/FAP/EPS8L2/MACF1/CLCN3/TIRAP/MYO6/APC/JCAD/EPB41L5/APPL2/ABCA7	16
CC	GO:0043256	laminin complex	5/1347	12/19520	0.00081604	0.0246036	0.0217324	LAMC2/LAMB3/LAMA1/LAMA5/LAMC1	5
CC	GO:0031674	I band	20/1347	134/19520	0.000872207	0.0250448	0.0221221	FHOD3/SLC8A1/ATP2B4/PDE4B/PDLIM3/DST/ANK3/DMD/AHNAK2/PPP1R12B/FLNB/NOS1AP/ANK1/CFL2/PPP3CA/SYNE2/PPP1R12A/MTM1/PDLIM4/FERMT2	20
CC	GO:0045177	apical part of cell	46/1347	414/19520	0.000957445	0.0262427	0.0231802	DPP4/STC1/GPR143/SHROOM2/PDE4D/ADGRF5/VANGL2/NIN/NOX4/ADGRG2/LZTS1/DCHS1/RAB27B/SLC38A3/SLC26A2/SHROOM1/NHS/GM2A/FAT4/CLDN1/LRP1/ATP7A/SLC11A2/PARD6B/DSG2/FAP/SLC12A2/FZD3/TCIRG1/ATP2B1/SLC26A6/SLC29A1/PAPPA2/PODXL/TMEM30A/DYNC2H1/EPS15/PATJ/SPTBN2/SHROOM3/NUMB/VASH1/MYO1B/MFSD4B/KCNK2/RAPGEF2	46
CC	GO:0005925	focal adhesion	46/1347	416/19520	0.00105838	0.0270909	0.0239295	PTK2B/DPP4/EHD3/FLT1/ITGA11/LPXN/TGM2/ITGA1/NOX4/MMP14/ITGB3/NRP1/TNS2/ITGA2/PLAU/NHS/LCP1/TNS3/SH3KBP1/LRP1/DST/CASK/ASAP3/PPFIBP1/FAP/GIT2/ITGA4/RAC2/ARHGAP24/FLNB/HMGA1/SORBS1/PROCR/ARHGAP26/PTPN12/MCAM/SYNE2/PPP1R12A/NUMB/IGF2R/PXN/PRAG1/EPB41L5/IRF2/FERMT2/JAK2	46
CC	GO:0043025	neuronal cell body	51/1347	474/19520	0.00107825	0.0270909	0.0239295	PTK2B/S100A5/SLC8A1/KCNH1/NTRK1/FEZ1/PTPRN/ITGA1/DPYSL5/CRMP1/TRPM2/ASTN2/MAP1A/NRP1/TIAM1/CACNG7/LRP4/GRIK5/KCNN4/KIF5C/ATP13A2/LRP1/ATP7A/DIP2B/SLC12A2/SOS1/SYT11/STRN3/ITGA4/KREMEN1/FZD3/NGFR/FLNB/HCFC1/SNCA/SLC22A3/WDFY3/ATP2B1/DRP2/PRKAR2B/STRN/DNER/PRKAA2/SPTBN2/ITSN1/MTOR/CAD/SNCG/FMR1/KCNK2/RAPGEF2	51
CC	GO:0043197	dendritic spine	24/1347	177/19520	0.00114517	0.0276214	0.0243981	PTK2B/FRMPD4/SLC8A1/LZTS1/PDE4B/FBXO2/TIAM1/TANC2/DOCK10/SIPA1L1/PRRT2/ZMYND8/SYT11/NGFR/ATP2B1/OPHN1/PPP3CA/PRKAR2B/STRN/ARHGAP32/ITSN1/PDLIM4/FMR1/NEDD4	24
CC	GO:0150034	distal axon	34/1347	287/19520	0.00145245	0.0336857	0.0297546	PTK2B/SLC8A1/CALB2/FEZ1/PTPRN/NIN/CRMP1/KIF21B/NRP1/TIAM1/RASGRF1/ITGA2/GRIK5/KIF5C/MAP3K12/TSHZ3/LRP1/PREX1/SSH1/PRRT2/UTRN/SYT11/ITGA4/CLCN3/NGFR/SNCA/AAK1/OPHN1/CAD/SNCG/FMR1/KCNK2/MYO9A/DICER1	34
CC	GO:0030018	Z disc	18/1347	122/19520	0.00176349	0.0393846	0.0347885	FHOD3/SLC8A1/ATP2B4/PDE4B/PDLIM3/DST/ANK3/DMD/AHNAK2/PPP1R12B/FLNB/NOS1AP/ANK1/CFL2/PPP3CA/SYNE2/PPP1R12A/PDLIM4	18
CC	GO:0005788	endoplasmic reticulum lumen	35/1347	306/19520	0.00227298	0.0489503	0.0432379	C3/SERPIND1/WNT5A/COL4A5/COL25A1/THBS1/ARSI/COL7A1/COL4A6/COL8A2/IGFBP4/COL9A3/VCAN/ERO1A/COL6A3/PDGFD/APOL1/TIMP1/COL17A1/COL16A1/P4HA2/ERAP2/ARSB/LTBP1/IL6/TMEM132A/CES3/WNT7B/ERAP1/EBI3/PDGFC/EDEM3/LAMC1/TSPAN5/PDGFA	35
MF	GO:0030695	GTPase regulator activity	76/1301	467/18337	6.80955e-12	6.85041e-09	6.41531e-09	PSD4/RGS17/RGPD5/SIPA1L2/DOCK4/RINL/RALGAPA1/DOCK9/CHML/ARHGAP5/NRP1/TIAM1/DEPDC5/DENND5B/RASGRF1/STXBP5/ARAP1/RAPGEF3/DOCK10/FGD4/MYCBP2/PREX1/SEC23A/SIPA1L1/PTGIR/ARHGEF10/AGAP1/AKAP13/ASAP3/ARHGEF11/ARFGEF3/ALS2CL/TBC1D8B/EPS8L2/DNMBP/SOS2/DENND4B/SOS1/GIT2/ADPRH/ARHGEF40/RTKN/ARAP3/ARHGAP18/NF1/SIPA1/HERC2/ARHGAP24/SRGAP1/PLCE1/DOCK5/OPHN1/TBC1D19/HPS4/STARD13/ARHGAP26/ARFGEF1/DENND1B/ARHGAP2…	76
MF	GO:0005085	guanyl-nucleotide exchange factor activity	37/1301	197/18337	4.27016e-08	1.60885e-05	1.50666e-05	PSD4/DOCK4/RINL/DOCK9/TIAM1/DENND5B/RASGRF1/RAPGEF3/DOCK10/FGD4/MYCBP2/PREX1/PTGIR/ARHGEF10/AKAP13/ARHGEF11/ARFGEF3/EPS8L2/DNMBP/SOS2/DENND4B/SOS1/ARHGEF40/HERC2/PLCE1/DOCK5/HPS4/ARFGEF1/DENND1B/GBF1/ITSN1/DENND3/CYTH1/ARHGEF12/RPGR/CCDC88A/RAPGEF2	37
MF	GO:0005096	GTPase activator activity	46/1301	276/18337	4.79775e-08	1.60885e-05	1.50666e-05	RGS17/RGPD5/SIPA1L2/DOCK4/RINL/RALGAPA1/CHML/ARHGAP5/NRP1/DEPDC5/STXBP5/ARAP1/PREX1/SEC23A/SIPA1L1/AGAP1/ASAP3/ARHGEF11/ALS2CL/TBC1D8B/SOS1/GIT2/ADPRH/ARAP3/ARHGAP18/NF1/SIPA1/ARHGAP24/SRGAP1/DOCK5/OPHN1/TBC1D19/STARD13/ARHGAP26/ARHGAP29/ARHGAP32/RASAL2/TBC1D7/ARHGEF19/FAM13A/ARHGAP42/FAM13B/ARHGEF12/MYO9A/TBC1D10B/RAPGEF2	46
MF	GO:0019955	cytokine binding	26/1301	136/18337	2.99961e-06	0.000754401	0.000706486	CSF2RA/GREM1/CD74/IL18R1/IL22RA1/IL12RB1/IL31RA/THBS1/CXCR6/TNFRSF14/ITGB3/IL1R1/NRP1/IL2RB/NRROS/TGFBR2/FGF2/LTBP1/ITGA4/TNFRSF11A/EBI3/CD109/CSF1R/CCRL2/LEPR/TGFBR3	26
MF	GO:0005543	phospholipid binding	58/1301	451/18337	7.53155e-06	0.00151535	0.0014191	CPNE8/ANXA8L1/PSD4/FRMPD4/WNT5A/PLA2G4A/LPAR3/KCNH1/THBS1/SH3PXD2A/KIF16B/PITPNM2/PLEKHA5/DGKA/VILL/ZFYVE26/SNX19/ARAP1/ATP13A2/ANXA8/PREX1/PAFAH2/PITPNC1/AGAP1/SPTBN1/SNX15/GRAMD1B/PACSIN3/TNFAIP8L3/SYT11/SNX13/ARAP3/NF1/TEC/ATG2A/EEA1/SNCA/WDFY3/TIRAP/OPHN1/ARHGAP26/EPB41/DENND1B/SNX21/ARHGAP32/LDLRAP1/PLEK2/ZCCHC2/SNX27/MTM1/GBF1/SPTBN2/MYO1B/FERMT2/APPL2/CCDC88A/RAPGEF2/SNX6	58
MF	GO:0035091	phosphatidylinositol binding	37/1301	253/18337	2.14101e-05	0.00358976	0.00336176	FRMPD4/PLA2G4A/KCNH1/SH3PXD2A/KIF16B/PITPNM2/PLEKHA5/VILL/ZFYVE26/SNX19/ARAP1/ATP13A2/ANXA8/PITPNC1/SNX15/TNFAIP8L3/SNX13/ARAP3/ATG2A/EEA1/WDFY3/TIRAP/EPB41/DENND1B/SNX21/ARHGAP32/LDLRAP1/PLEK2/ZCCHC2/SNX27/MTM1/GBF1/MYO1B/FERMT2/APPL2/CCDC88A/SNX6	37
MF	GO:0003779	actin binding	55/1301	439/18337	2.71958e-05	0.00390842	0.00366018	TMSB4Y/SHROOM2/FHOD3/LSP1/ABLIM3/MAP1A/FMN1/SHROOM1/VILL/MLPH/LCP1/PDLIM3/CLMN/ANXA8/PLEKHH2/FGD4/DST/HOOK1/DMD/SSH1/IPP/SPTBN1/UTRN/EPS8L2/MACF1/FLNB/SORBS1/SNCA/DAAM1/MYO18A/OPHN1/FMNL3/CFL2/CORO1A/EPB41/FMNL2/MYO6/EPB41L1/SYNE2/EPB41L3/SPTBN2/SHROOM3/PDLIM4/RAI14/COBLL1/VASH1/MYO1B/DIAPH2/MYH10/FHOD1/FERMT2/MYO9A/CCDC88A/KLHL5/TRPM7	55
MF	GO:0008017	microtubule binding	36/1301	269/18337	0.000176094	0.0221438	0.0207373	CCDC69/NDRG1/DPYSL5/NIN/KIF16B/MAP6/LZTS1/KIF21B/MTUS1/MAP1A/TIAM1/FMN1/KIF5C/DST/HOOK1/HAUS4/TUBGCP5/CEP295/MACF1/ALMS1/ABRAXAS1/KATNAL1/TOGARAM1/CAMSAP2/MDM1/CEP57L1/APC/KIF3A/MAST2/EML2/MAP9/FMR1/SPAST/KIF13A/KIF13B/CCDC88A	36
MF	GO:0019838	growth factor binding	22/1301	137/18337	0.000253374	0.0283216	0.0265228	FLT1/KDR/THBS1/NTRK1/HTRA3/ITGB3/IL1R1/NRP1/IL2RB/SRPX2/IGFBP4/NRROS/TGFBR2/LTBP1/ACVR1C/NGFR/IGF1R/CD109/IGF2R/TGFBR3/FURIN/PDGFA	22
MF	GO:0005201	extracellular matrix structural constituent	25/1301	170/18337	0.000403782	0.0361784	0.0338805	LUM/SRPX/COL4A5/COL25A1/THBS1/LAMC2/COL7A1/CTHRC1/LAMB3/LAMA1/COL4A6/SRPX2/LAMA5/COL8A2/COL9A3/VCAN/COL6A3/COL17A1/COL16A1/LTBP1/EMILIN1/FBN2/TINAGL1/HMCN1/LAMC1	25
MF	GO:1901981	phosphatidylinositol phosphate binding	25/1301	171/18337	0.000441752	0.0361784	0.0338805	FRMPD4/PLA2G4A/KCNH1/SH3PXD2A/KIF16B/PLEKHA5/VILL/ZFYVE26/SNX19/ARAP1/ATP13A2/ANXA8/SNX13/ARAP3/ATG2A/TIRAP/DENND1B/SNX21/ARHGAP32/LDLRAP1/PLEK2/SNX27/GBF1/MYO1B/FERMT2	25
MF	GO:0019199	transmembrane receptor protein kinase activity	15/1301	80/18337	0.000446216	0.0361784	0.0338805	FLT1/TIE1/KDR/MERTK/NTRK1/INSRR/NRP1/TGFBR2/LTBP1/ACVR1C/IGF1R/DDR1/CSF1R/IGF2R/TGFBR3	15
MF	GO:0015631	tubulin binding	44/1301	368/18337	0.000467514	0.0361784	0.0338805	CCDC69/FEZ1/NDRG1/DPYSL5/NIN/KIF16B/MAP6/LZTS1/KIF21B/MTUS1/MAP1A/PDE4B/TIAM1/FMN1/KIF5C/DST/HOOK1/DIP2B/HAUS4/TUBGCP5/CEP295/MACF1/SYT11/ALMS1/ABRAXAS1/KATNAL1/SNCA/TOGARAM1/HTT/CAMSAP2/MDM1/CEP57L1/APC/KIF3A/TTLL4/MAST2/EML2/MAP9/FMR1/SPAST/KIF13A/KIF13B/CCDC88A/RAD51D	44
MF	GO:0032266	phosphatidylinositol-3-phosphate binding	10/1301	42/18337	0.000564997	0.0405991	0.0380205	PLA2G4A/KIF16B/PLEKHA5/ZFYVE26/SNX19/SNX13/ATG2A/SNX21/PLEK2/SNX27	10
MF	GO:0005001	transmembrane receptor protein tyrosine phosphatase activity	6/1301	17/18337	0.000789369	0.0496316	0.0464793	PTPRU/PTPRG/PTPRR/PTPRE/PTPRK/PTPRM	6
MF	GO:0019198	transmembrane receptor protein phosphatase activity	6/1301	17/18337	0.000789369	0.0496316	0.0464793	PTPRU/PTPRG/PTPRR/PTPRE/PTPRK/PTPRM	6

## Sheet: S5
Supplementary Table S5. Enriched functional annnotation terms associated with significantly down-regulated genes in WT 12h vs WT 0h.
ONTOLOGY	ID	Description	GeneRatio	BgRatio	pvalue	p.adjust	qvalue	geneID	Count
BP	GO:0043062	extracellular structure organization	66/1655	394/18862	2.26535e-07	0.00112144	0.0010513	FBLN1/FBLN2/POSTN/AEBP1/MATN4/SLC2A10/ECM2/ITGAL/ITGA2B/ADAMTS13/LAMA2/SPOCK2/COL11A2/MMP25/MELTF/FBLN5/JAM3/SULF1/RAMP2/LOX/BGN/ADAMTSL1/ITGB4/SMPD3/COL13A1/TNXB/SERPINF2/ICAM5/CCDC80/CARMIL2/COL11A1/FOXC1/TEX14/ITGA10/ITGB2/TNFRSF1B/KAZALD1/SCX/CRISPLD2/MMP24/COL5A3/NTN4/MFAP4/POMT1/RGCC/ADAMTSL4/HAS3/ADAMTS1/COL8A1/ADAM12/KIF9/NTNG1/SPARC/ERCC2/CTSV/ICAM1/ADAMTS2/MPV17/RUNX1/FOXF2/ITGAM/TLL1/G…	66
BP	GO:0030198	extracellular matrix organization	65/1655	393/18862	4.46438e-07	0.00112144	0.0010513	FBLN1/FBLN2/POSTN/AEBP1/MATN4/SLC2A10/ECM2/ITGAL/ITGA2B/ADAMTS13/LAMA2/SPOCK2/COL11A2/MMP25/MELTF/FBLN5/JAM3/SULF1/RAMP2/LOX/BGN/ADAMTSL1/ITGB4/SMPD3/COL13A1/TNXB/SERPINF2/ICAM5/CCDC80/CARMIL2/COL11A1/FOXC1/ITGA10/ITGB2/TNFRSF1B/KAZALD1/SCX/CRISPLD2/MMP24/COL5A3/NTN4/MFAP4/POMT1/RGCC/ADAMTSL4/HAS3/ADAMTS1/COL8A1/ADAM12/KIF9/NTNG1/SPARC/ERCC2/CTSV/ICAM1/ADAMTS2/MPV17/RUNX1/FOXF2/ITGAM/TLL1/GAS6/FO…	65
BP	GO:0045229	external encapsulating structure organization	65/1655	396/18862	5.88991e-07	0.00112144	0.0010513	FBLN1/FBLN2/POSTN/AEBP1/MATN4/SLC2A10/ECM2/ITGAL/ITGA2B/ADAMTS13/LAMA2/SPOCK2/COL11A2/MMP25/MELTF/FBLN5/JAM3/SULF1/RAMP2/LOX/BGN/ADAMTSL1/ITGB4/SMPD3/COL13A1/TNXB/SERPINF2/ICAM5/CCDC80/CARMIL2/COL11A1/FOXC1/ITGA10/ITGB2/TNFRSF1B/KAZALD1/SCX/CRISPLD2/MMP24/COL5A3/NTN4/MFAP4/POMT1/RGCC/ADAMTSL4/HAS3/ADAMTS1/COL8A1/ADAM12/KIF9/NTNG1/SPARC/ERCC2/CTSV/ICAM1/ADAMTS2/MPV17/RUNX1/FOXF2/ITGAM/TLL1/GAS6/FO…	65
BP	GO:0070059	intrinsic apoptotic signaling pathway in response to endoplasmic reticulum stress	18/1655	61/18862	2.90599e-06	0.00414976	0.0038902	HSPA1A/TRIB3/CHAC1/TP53/ATP2A1/DDIT3/XBP1/TXNDC12/PPP1R15A/PMAIP1/HERPUD1/BBC3/EIF2AK3/BCL2L11/ITPR1/ERN1/ATF4/CREB3L1	18
BP	GO:0007091	metaphase/anaphase transition of mitotic cell cycle	17/1655	61/18862	1.27247e-05	0.0145367	0.0136275	PLK1/CDC20/CCNB1/DLGAP5/UBE2C/TEX14/AURKB/BUB1/DUSP1/USP44/ANAPC15/NEK6/CDC26/KLHL22/ANAPC11/TACC3/MAD2L1	17
BP	GO:0045444	fat cell differentiation	39/1655	221/18862	1.9355e-05	0.0161047	0.0150974	DIO2/KLF4/TPH1/ZFP36/NR4A3/RGS2/TRIB3/NR4A2/SMAD6/GATA2/RORA/BSCL2/DDIT3/NR4A1/XBP1/JDP2/NR1D1/CCDC85B/NOCT/PIM1/ZFP36L2/PER2/ZFPM1/SOCS1/EGR2/WNT5B/BNIP3/ARL4A/CARM1/PPARD/ZBTB7A/TRPM4/METRNL/ATAT1/GNB3/PLAC8/LRP5/CBY1/PTGS2	39
BP	GO:0007018	microtubule-based movement	57/1655	370/18862	2.0082e-05	0.0161047	0.0150974	SLC9C1/DNAH2/TEKT2/IFT172/ADCY10/MAPT/TTLL9/KIF17/QRICH2/TACR2/AP3B2/MGARP/TCTE1/CFAP43/RSPH9/DNHD1/DNAH1/DNAH11/SPEF1/KIF20A/DLGAP5/DNAH12/DNAH10/NME5/CFAP53/DPCD/KIF26A/TTLL1/ZMYND10/CFAP97D1/CCDC40/HSPB1/NEK10/ENKUR/RSPH4A/SORD/FMN2/KLC3/KIF9/KIF2C/STK11/BICDL1/DNAH17/HAP1/SSNA1/BAG3/UBB/IFT140/TPGS1/IFT20/ARL3/KIF23/SPAG16/DNAL4/TUB/BLOC1S4/ARMCX3	57
BP	GO:0010965	regulation of mitotic sister chromatid separation	17/1655	64/18862	2.5375e-05	0.0161047	0.0150974	PLK1/CDC20/CCNB1/DLGAP5/UBE2C/TEX14/AURKB/BUB1/DUSP1/USP44/ANAPC15/NEK6/CDC26/KLHL22/ANAPC11/TACC3/MAD2L1	17
BP	GO:0044784	metaphase/anaphase transition of cell cycle	17/1655	64/18862	2.5375e-05	0.0161047	0.0150974	PLK1/CDC20/CCNB1/DLGAP5/UBE2C/TEX14/AURKB/BUB1/DUSP1/USP44/ANAPC15/NEK6/CDC26/KLHL22/ANAPC11/TACC3/MAD2L1	17
BP	GO:0030071	regulation of mitotic metaphase/anaphase transition	16/1655	59/18862	3.3008e-05	0.0188542	0.0176749	PLK1/CDC20/CCNB1/DLGAP5/UBE2C/TEX14/AURKB/BUB1/DUSP1/USP44/ANAPC15/NEK6/CDC26/KLHL22/ANAPC11/MAD2L1	16
BP	GO:0051306	mitotic sister chromatid separation	17/1655	66/18862	3.90939e-05	0.0203004	0.0190307	PLK1/CDC20/CCNB1/DLGAP5/UBE2C/TEX14/AURKB/BUB1/DUSP1/USP44/ANAPC15/NEK6/CDC26/KLHL22/ANAPC11/TACC3/MAD2L1	17
BP	GO:1902099	regulation of metaphase/anaphase transition of cell cycle	16/1655	62/18862	6.38996e-05	0.0304162	0.0285138	PLK1/CDC20/CCNB1/DLGAP5/UBE2C/TEX14/AURKB/BUB1/DUSP1/USP44/ANAPC15/NEK6/CDC26/KLHL22/ANAPC11/MAD2L1	16
BP	GO:0070841	inclusion body assembly	9/1655	23/18862	7.9051e-05	0.0338087	0.0316941	HSPA1A/DNAJA4/MAPT/DNAJB1/SNCAIP/HSPA1B/HSPA2/BAG3/DNAJB6	9
BP	GO:0045746	negative regulation of Notch signaling pathway	12/1655	39/18862	8.28645e-05	0.0338087	0.0316941	DLL1/CHAC1/GATA2/NRARP/ARRDC1/BCL6/EGFL7/TSPAN15/DLX2/METTL3/ZBTB7A/NFKBIA	12
BP	GO:0051783	regulation of nuclear division	26/1655	135/18862	0.000104512	0.0354805	0.0332613	PIWIL2/PLK1/LIF/CDC20/SMPD3/CCNB1/EDN1/NEK2/DLGAP5/TEX14/AURKB/NPM2/AURKA/BUB1/PIN1/DUSP1/RGCC/USP44/ANAPC15/MSX1/SH2B1/CALR/KLHL22/ANAPC11/LRP5/MAD2L1	26
BP	GO:0033045	regulation of sister chromatid segregation	17/1655	71/18862	0.000105597	0.0354805	0.0332613	PLK1/CDC20/CCNB1/DLGAP5/UBE2C/TEX14/AURKB/BUB1/DUSP1/USP44/ANAPC15/NEK6/CDC26/KLHL22/ANAPC11/TACC3/MAD2L1	17
BP	GO:1905818	regulation of chromosome separation	17/1655	71/18862	0.000105597	0.0354805	0.0332613	PLK1/CDC20/CCNB1/DLGAP5/UBE2C/TEX14/AURKB/BUB1/DUSP1/USP44/ANAPC15/NEK6/CDC26/KLHL22/ANAPC11/TACC3/MAD2L1	17
BP	GO:0031589	cell-substrate adhesion	53/1655	359/18862	0.00012089	0.0367151	0.0344187	FBLN1/FBLN2/POSTN/CDH13/ECM2/ITGAL/ITGA2B/TTYH1/TECTA/ADAMTS13/RHOD/SPOCK2/MELTF/FBLN5/JAM3/FAT2/LIMS2/SEMA3E/EFNA1/CSPG5/ITGB4/COL13A1/SMAD6/EPHB3/CCDC80/RADIL/ITGA10/ITGB2/BCL6/CCL28/COL5A3/DMTN/NTN4/COL8A1/NTNG1/FZD7/BST1/LYPD3/CORO2B/BCAS3/PPARD/PPM1F/BCL2L11/CDKN2A/TMEFF2/GAS6/CALR/CSF1/BCAM/ACTG1/TMEM8B/ZYX/ONECUT2	53
BP	GO:0036293	response to decreased oxygen levels	53/1655	360/18862	0.000129946	0.0367151	0.0344187	CA9/POSTN/CD38/EGR1/UCP3/OXTR/DDIT4/RAMP2/ANG/MGARP/ENDOG/OPRD1/NR4A2/MYC/FAM162A/CCNB1/EDN1/TP53/SLC1A1/RORA/LTA/APOLD1/ANKRD1/ADM/PIN1/VASN/RGCC/PMAIP1/LONP1/FMN2/AK4/PSMD5/ERCC2/ICAM1/TIGAR/CITED2/BNIP3/LDHA/UBB/PPARD/PSMB10/STC2/ITPR1/IRAK1/BIRC2/EGLN3/ATF4/PSMB7/PDK1/AQP3/PTGS2/HK2/CCNA2	53
BP	GO:0007517	muscle organ development	48/1655	317/18862	0.000134475	0.0367151	0.0344187	FOS/EGR3/SGCG/EGR1/MYH15/SGCA/DLL1/ACTC1/LAMA2/TTN/MYH3/STAC3/ERBB3/LOX/LIF/POU6F1/NUPR1/MKX/CDON/TAGLN/MYH14/COL11A1/POPDC2/FOXC1/HMG20B/SOX15/XBP1/ANKRD1/TCAP/ATF3/TPM1/FOXO4/HBEGF/SCX/CTF1/NEB/NOG/ZFPM1/LEF1/EGR2/SAP30/SIRT6/MSX1/JPH2/FOXC2/EEF2/BTG2/MAFF	48
BP	GO:0090084	negative regulation of inclusion body assembly	6/1655	11/18862	0.000141808	0.0367151	0.0344187	HSPA1A/DNAJA4/DNAJB1/HSPA1B/HSPA2/DNAJB6	6
BP	GO:1990440	positive regulation of transcription from RNA polymerase II promoter in response to endoplasmic reticulum stress	6/1655	11/18862	0.000141808	0.0367151	0.0344187	HSPA5/TP53/DDIT3/ATF3/ATF4/CREB3L1	6
BP	GO:0042692	muscle cell differentiation	53/1655	362/18862	0.00014993	0.0367151	0.0344187	ID2/DLL1/ACTC1/ALPK3/LMOD1/ERVW-1/TTN/RGS2/KDM6B/MYH3/STAC3/RAMP2/LOX/TMEM119/CDON/KRT19/CCNB1/MYLK3/EDN1/RORA/OBSCN/POPDC2/BHLHE41/XBP1/ANKRD1/TCAP/LBX2/TBX2/TPM1/FOXO4/ADM/PIN1/NEB/MYEF2/NFATC1/ANK2/WFIKKN1/ADAM12/SMYD3/FZD7/TCF3/TMOD1/WNT5B/DMPK/IFT20/MSX1/ALPK2/RGS4/MYPN/EHD1/CALR/CHRNB1/CBY1	53
BP	GO:0000079	regulation of cyclin-dependent protein serine/threonine kinase activity	21/1655	101/18862	0.000154265	0.0367151	0.0344187	PLK1/CDKN1C/PSRC1/GADD45A/CKS2/CCNB1/CCNB2/CDKN3/RGCC/CDKN2D/SERTAD1/HEXIM1/CDK5R1/CCNG2/CDKN2A/MAPRE3/CCNL1/CCNT1/CKS1B/CDC37/CCNA2	21
BP	GO:0051146	striated muscle cell differentiation	42/1655	269/18862	0.000175103	0.0400076	0.0375053	DLL1/ACTC1/ALPK3/LMOD1/ERVW-1/TTN/RGS2/KDM6B/MYH3/STAC3/LOX/TMEM119/CDON/KRT19/CCNB1/MYLK3/EDN1/OBSCN/POPDC2/BHLHE41/XBP1/ANKRD1/TCAP/TPM1/PIN1/NEB/MYEF2/WFIKKN1/ADAM12/SMYD3/FZD7/TMOD1/DMPK/IFT20/MSX1/ALPK2/RGS4/MYPN/EHD1/CALR/CHRNB1/CBY1	42
BP	GO:0090083	regulation of inclusion body assembly	7/1655	16/18862	0.000222119	0.0452114	0.0423836	HSPA1A/DNAJA4/DNAJB1/SNCAIP/HSPA1B/HSPA2/DNAJB6	7
BP	GO:0007094	mitotic spindle assembly checkpoint	11/1655	37/18862	0.00022954	0.0452114	0.0423836	PLK1/CDC20/CCNB1/TEX14/AURKB/BUB1/DUSP1/USP44/ANAPC15/KLHL22/MAD2L1	11
BP	GO:0071173	spindle assembly checkpoint	11/1655	37/18862	0.00022954	0.0452114	0.0423836	PLK1/CDC20/CCNB1/TEX14/AURKB/BUB1/DUSP1/USP44/ANAPC15/KLHL22/MAD2L1	11
BP	GO:0071174	mitotic spindle checkpoint	11/1655	37/18862	0.00022954	0.0452114	0.0423836	PLK1/CDC20/CCNB1/TEX14/AURKB/BUB1/DUSP1/USP44/ANAPC15/KLHL22/MAD2L1	11
BP	GO:0014706	striated muscle tissue development	51/1655	351/18862	0.000238793	0.0454662	0.0426225	FOS/SGCG/EGR1/MYH15/DLL1/ACTC1/ALPK3/TTN/RGS2/KDM6B/STAC3/ERBB3/LOX/NUPR1/CDON/MYH14/CCNB1/COL11A1/MYLK3/EDN1/POPDC2/FOXC1/HMG20B/SOX15/ANKRD1/TCAP/ATF3/TBX2/TPM1/SCX/PIN1/NEB/NOG/FZD7/PIM1/ZFPM1/LEF1/EGR2/SAP30/RUNX1/SIRT6/IFT20/ALPK2/RGS4/JPH2/CALR/FOXC2/EEF2/BTG2/CBY1/MAFF	51
CC	GO:0005874	microtubule	72/1731	423/19520	5.1541e-08	3.51509e-05	3.43426e-05	DNAH2/TEKT2/SAXO1/EFHC2/DCDC2B/MAPT/PLK1/TTLL9/TUBB3/KIF17/PSRC1/MISP/BEX4/KIF26B/KCNAB2/TUBB4A/DCDC2/DNAH1/TTLL11/DNAH11/NEK2/SPEF1/KIF20A/DNAH12/RADIL/DNAH10/TUBB1/KIF26A/AURKB/MAP1LC3B2/REEP1/AURKA/KATNAL2/BIRC5/TTLL1/SAXO2/TUBB2A/DNM1/GAS2L3/SPACA9/DCTN3/KLC3/KIF9/KLHL21/FHDC1/SARM1/KIF2C/DYNLT1/MAP1LC3B/DNAH17/APC2/DCXR/TUBE1/BCAS3/TUBB4B/HOOK2/HAUS6/MAP2K2/TPGS1/NEK6/CYLD/MAPRE3/TUBA1C/TTLL…	72

## Sheet: S6
Supplemental Table S6. List of genes differentially changed in WT and ATG7-/-. “WT only” and “KO only” for those changed only in WT or KO, respectively, while “WT KO shared” for those changed in both genotypes.
Up-regulated in 12h vs 0h			Down-regulated in 12h vs 0h
WT KO shared	KO only	WT only	WT KO shared	KO only	WT only
1282	847	1102	1032	1259	1187
HSPA6	DAPK1	SLCO5A1	DACH1	TMEM240	HLA-DRA
AREG	GKN2	GRIN2C	C1QTNF3	KLRC2	CYBB
CSF3	GALNT18	CDKN1C	SIM1	CCNB3	MUSK
GDF15	GJD3	PLCH2	PDE7B	KLF17	CALCRL
GREB1	HOXC5	PIWIL2	SORBS2	NUTM2F	TRIM17
LHX3	KLF1	RCSD1	ASPM	SMIM11A	CHRM2
ANGPTL4	FAM166B	MYOZ3	DIO2	CASC1	CPAMD8
SH2D2A	GCNT3	AVPR2	SAMD12	OR2T8	DEFB131B
BTG2	ABCG4	RAB33A	FIGN	MEOX1	CPZ
PLEKHA6	ZCCHC12	DNAH2	FAM227A	SLC44A5	ZNF99
RRAD	B3GAT2	PYGM	SPTLC3	SOWAHD	SOX5
FBXW10	LIMS4	NUP210L	CCDC190	WNT16	RUNX1T1
NECTIN4	FAM183A	PLAC8L1	CENPE	CCL7	LUZP2
SERPINB10	TPBGL	SERPINF2	TCP11L2	PLGLB1	AKAP6
GPR87	FAM71D	PNLDC1	KIF18A	FMO3	TEX22
DRAXIN	HPCAL4	EGR3	DNAH6	ROS1	UTRN
KANK3	TAS2R31	TMEM119	KCTD16	TLE6	LYZ
FOS	ARHGAP25	MUC12	CENPF	TSPAN18	FRY
POU3F2	PRKCQ	ACTC1	SPATA17	ST6GALNAC3	CDH18
SLC52A1	PSCA	N4BP2L1	ZNF608	TSPOAP1	BTBD8
GNA15	SUMO4	CCL20	SPN	CCDC170	SMIM5
CDKN1A	HTRA4	MYLK4	NLGN1	PTGES3L	AC112128.1
PTGS1	CD8A	SOX30	PIF1	TSNAXIP1	CDRT15
AC099489.1	CASKIN1	PKD1L1	CCDC180	APCDD1L	DYNC2H1
GRHL3	OR10A3	PLEKHD1	FBXO43	PPOX	KIAA1958
IL6	CACNB4	S100A14	DNAJC28	IGFN1	NRIP2
DUSP5	MAL2	TAF7L	PPM1H	GPRIN3	VPS13B
CFAP97D1	DISP3	GPR83	CRISPLD1	TMEM119	ZNF681
ABCA4	ANGPT2	BTN1A1	HOXA2	COL24A1	MYO1F
MCC	ISM2	SLC16A11	CIT	TMEM52B	FABP3
LRRC15	ARIH2OS	SHISA7	ARL14EPL	PTGES	HSPG2
TSGA10IP	COL25A1	ADCY10	CLDN18	TTLL9	FAM95C
TNFSF14	ASNS	ID2	NBEA	CLCNKB	MSH5
FOSB	PCDHGA12	JSRP1	LRBA	CATSPERE	TP53TG3D
RASD1	ADGRL3	SYBU	BNC2	GNB1L	DUSP19
IL16	RAB39A	CETP	CFAP44	HES7	RNF150
LTA	PCDHAC1	RRH	PPP1R9A	ERVW-1	NBEAL1
MAFA	CHRD	KRT86	ARHGEF33	RASSF9	FUT2
DNAH12	LRRC71	AIFM3	ATOH8	CCDC154	C6orf201
EFNB1	NT5C1B	SPI1	KANTR	UBE2C	CDH6
SHC4	ADGRF5	PRELP	RTKN2	FGF1	ZNF610
UGT2B7	IL12RB1	AEBP1	CCDC65	RHOU	ANKRD23
NR4A3	ALDH3A1	REM2	OR2I1P	FGF17	GVQW3
EGR2	SERPIND1	GRB7	FAM78B	CCDC189	IFI44L
ATF3	SYTL1	SSUH2	TENM2	AZIN2	GOLGA8N
CKM	ZNF114	ITGA10	PARD3B	FBXO15	ZNF774
ACER2	ESR2	EFCAB12	DISC1	CFI	FAT4
INSYN2	ENHO	UPK1A	SNPH	LDLR	MAML3
CES3	TPPP	LKAAEAR1	RBMS3	OPN3	FSIP2
IL1B	GK	CEND1	LRRIQ1	ARMH1	DOCK3
TNFSF4	PARM1	NEUROG2	CCDC191	GIP	KCTD19
BCL2A1	COMP	SLC45A2	COL12A1	RANGRF	C11orf88
CSF2	SGPP2	LRIT3	SLITRK5	SLCO2A1	TRERF1
MAB21L1	RGS4	OVGP1	KIF14	NOXA1	NCKAP5
INHBA	PDK3	ALB	DCDC2	TSPAN15	FAM217A
HSPA1A	SETBP1	NEURL3	EPHA5	CPT1C	PMFBP1
IQANK1	MED12L	GPR35	GAS2L3	CDON	NAV1
GPR37	FGF12	MYH15	SYTL5	NAT14	SAMD15
LIF	SLC8A1	SCO2	PIEZO2	UCP3	DST
CDH10	NDUFV2	LY6G6C	GLIS1	SNORC	CACNA1A
PTAFR	SRGAP1	MID1IP1	CDK15	TMEM160	A1BG
IGSF9	LHX9	CTXND1	RARB	OSCAR	NDUFA7
GADD45A	ADAMTS15	AL391650.1	SGO2	PIP5KL1	FRMPD4
CXCL8	GPR146	GEM	TNFAIP8L1	NSUN7	LRP1
IL1A	LYPD5	HCN4	STON1	XKR4	SERF1B
GPD1	ACTBL2	CD38	BUB1	ATP10B	ANKRD36C
SOCS1	PPL	CRB2	ALPK1	NTHL1	C6orf163
KLF4	CERS6	PLB1	BUB1B	OASL	MRTFB
CAVIN2	SYT16	GPR37L1	BORA	LTB	SYNE1
PMAIP1	ARAP1	SLC9C1	AK9	WDR78	ZFP14
CLDN6	MAP1A	ZACN	PDE1C	GRIK1	RELN
HBEGF	SLC48A1	DCAF4L1	TRIM59	NME7	ADGRL3
JAG1	NTF4	FAM71F1	AC068831.7	ACTR3C	KIAA1109
RSPO3	GABRQ	LRRC43	NOVA2	CCDC153	PLAG1
RASSF10	FNIP2	BAAT	FZD2	SP140	VPS13A
PHLDA3	TMEM121	SCRT1	RALGPS2	TMEM269	RNF213
ADAMTS13	KIAA1755	P2RX6	CYB5RL	ADRA1B	PUS7L
IL13RA2	DSP	CRTAC1	RALGAPA2	CA8	TBC1D32
CDC42BPG	NPR1	GOLGA7B	SALL2	STAC3	NIPSNAP3B
PAQR9	INSR	MYO15B	LRRC7	POLN	RFX3
PTP4A1	ERFE	VWA5B2	PRR16	RP1	CATSPER2
ITGAM	EMILIN3	RGS2	ETV1	IL18R1	PRR36
XDH	IGSF3	NODAL	STXBP4	MPP4	STXBP5L
GALR2	C3orf70	CFAP161	SDK1	DHRS12	AC023509.3
IL36G	CCDC148	FAM13C	DOP1B	IL18	C9orf84
ANK1	RGL4	CFAP43	NAALADL2	HIST1H2BO	SCN8A
ZFP36L2	TMEM131	RIPOR2	TTK	AOAH	SZT2
PHLDA2	AL031281.2	DLL1	METTL7A	SCRN2	MDGA2
BBC3	RBP4	TCTE1	DEPDC1	C6orf58	SPG11
MDM2	NAP1L2	SOWAHD	CYP1B1	GSTA4	LMLN
PGF	TMEM215	CCDC121	SCN9A	PAQR6	DCHS1
TNFAIP3	XPC	ALPK3	CARF	ENDOG	MYCT1
CXCL3	FRMPD3	FOXL1	KIF20B	BEX1	HIST1H2AI
GDNF	CXCR6	TMEM236	RBMS2	EFNA1	EDDM13
C3orf80	FAM198B	C2	CPS1	VNN1	CCDC85A
WDR63	PSG5	GSTO2	MKI67	ZCWPW2	SCUBE3
CHRNA3	NXN	SHISA2	PAQR5	CAVIN3	PLEKHH2
CYP11A1	HKDC1	CLEC18B	NEXN	CLDN3	SLC16A7
INSRR	OXCT2	NRXN1	FILIP1L	RTN4RL2	ANKRD28
SAT1	REV3L	B4GALNT2	FMN2	HLA-DMB	SENP7
RGCC	DICER1	PKDREJ	SLC9A9	PIK3IP1	TRPC4
NGFR	PTBP3	SBSN	TOP2A	IP6K3	CEP295
EPN3	ADCY9	MATN4	KIF20A	HSF4	TET1
ARHGAP30	FRMD5	EGR1	SLITRK3	KIAA1024	MSS51
GABBR2	TCAF2	NR4A2	ATXN1	ADM5	TANC2
CXCL2	CCDC88C	DDN	COL11A1	SIRT4	FAM78A
HECW2	STARD6	SLC5A2	MAATS1	PDGFRL	SEMA6A
EDA2R	PRRC2B	OSGIN1	ADAM28	BHLHE41	MPDZ
TNFRSF10A	MYO5A	ETV7	CENPI	PECAM1	PTPRJ
ISLR2	AC126755.2	PODXL2	GBP2	FKBP1B	NR3C2
NSG1	GPRC5A	MGAM	EXPH5	SSTR2	BAZ2B
TEX14	GRHL1	COL15A1	ZMYM3	NUTM2D	TRIM66
SIK1B	CNTNAP3C	UNC13A	MAVS	POU5F1	MYO5C
PDE4C	XPR1	SPTB	ZFYVE28	FAM229A	FAT3
CYGB	GPHN	ITGA2B	ANLN	RARRES2	GALNT5
RNF19B	NSD1	PROX1	ALDH6A1	PDE6D	PXMP4
SAA2	DERA	CLDN16	MEGF8	ALX4	PGPEP1
SOX7	NFATC3	ABAT	DLGAP5	CCDC28B	LPP
PDE6G	PLAC8	PLEKHG6	CBX7	C12orf60	ZNF396
CEACAM1	KIAA1211	GAS1	ATP7B	CD14	HECTD4
PTPN6	CARNS1	TEK	ATM	CDC42EP5	CMTM1
TBR1	CPNE8	TDRD12	DNAH5	KIAA0825	TTC28
DKK2	FOXE1	SELPLG	NOVA1	PCED1A	ANK2
FCGBP	PAPPA2	FES	AC091057.6	RPS6KL1	VGLL3
RHOB	OSBP2	ACSBG1	CTIF	SRSF5	CKMT2
NIPAL4	PLXNB2	LGALS9	TMEM170B	ZNF385D	LYST
DUSP1	PCDHGB2	RHOV	KIF4A	AKR7A3	THSD4
F2RL2	ARHGEF11	TEX29	PLK1	MAP2	BRWD3
PTHLH	TFEC	KCNN1	CRMP1	ID4	TTBK2
LRRTM2	TCP11L1	TEKT2	LMTK3	CIART	FAM160A1
PHLDA1	ADPRH	ALDOB	ERBB3	MFSD3	CTSK
ULBP1	ANO7	ASPRV1	FRK	HIST1H3E	CTNND2
PTGS2	MYO1D	C5AR1	PRR11	DAW1	KNTC1
TENT5C	2022-09-03	WDR38	PAQR8	NPAS3	CCDC88A
SPTBN5	PVR	B4GALNT3	ADAMTSL3	SNCAIP	IPO8
CA12	TNRC6C	STEAP1B	PTGFR	TMEM169	PPP1R12B
IL12A	TLR4	LCK	SPC24	ASPHD1	FBN1
FDXR	EMILIN1	IL18R1	TLL1	NIPSNAP3A	NMU
LIPG	CEP295NL	XKRX	RALGPS1	GJC2	IL17RD
NKX2-5	ZNF37A	HLA-DOB	IQGAP3	MYOCD	PHF21A
ACHE	SPATA7	ZC3H12D	INCENP	TP53	PDGFRA
GGT1	KMT2C	QRFP	CCBE1	PRKAR1B	KIF16B
AOC3	ZNF341	SLC25A32	P2RY6	TSTD3	JAK3
FRZB	TET2	KIAA1257	KIAA1328	RSRP1	BBX
SLC7A8	RGPD5	MSH4	PRRT2	SLC38A4	ZFHX4
TMEM40	PCDHAC2	MMRN2	CCNB1	CREB5	TMEM139
SLC26A7	HIP1R	DNAJA4	ARHGAP11A	MYZAP	CCDC171
HAS2	TMEM47	PIWIL4	PSRC1	METTL3	STAT2
ERN1	NOS1AP	IL3RA	ARL17B	NXNL2	KIAA0586
CYFIP2	ANKHD1	G0S2	DBF4B	SLC39A13	LIMCH1
SPRY4	ARHGAP20	CCER2	KBTBD3	HOXB8	ZSWIM5
INKA2	MAST3	LRRC56	EFHC2	IMMP2L	FOXP2
MYOM3	MYCL	MYEOV	PLD1	MAP3K8	SBF2
SESN1	VWA8	IQCN	CCNG2	GTF2IRD2	PIH1D2
FAM83E	BRSK2	ZNF418	GBP5	BEND6	DLX6
CAMK1G	PHLPP1	GCNA	MAPK10	LCA5L	HYKK
CCR7	CYYR1	STRA6	CCDC146	P2RX7	DIAPH2
SOWAHB	LNPEP	ZG16B	YPEL1	CDH5	DNAJC27
LIN7A	IL24	NOV	TRAPPC9	QPCTL	FAM172A
KITLG	ACVR2B	ADORA2A	DPYD	ID1	USP30
TAGLN3	PRCD	NUTM2B	AURKA	SHLD1	SRBD1
ADPRHL1	JADE3	BTK	PLA2R1	GGT5	ATP7A
PCDHGC5	GRIN3B	TMEM88	SORT1	COQ10A	MAGI3
PLAT	DISP2	F2	SEMA3E	DHRS1	TRMT1L
DUSP4	EFNA2	C7orf61	CEP44	TRPM2	TBC1D8B
POU4F2	LCOR	ATP10B	IFT80	STX10	MITF
SLC30A3	MYCT1	HGFAC	COL8A1	MX2	FOXRED2
MAST4	NOTCH3	EPB41L4A	ZC3H6	CSDC2	ADGRG6
NLRP3	ANKH	SLC2A5	UACA	SPATA1	MAMSTR
SPATA18	DGKA	LILRA6	BCAS3	ZFP2	CDK5RAP2
COL9A3	GOLGA6L10	CD200R1	HMMR	TMEM232	INVS
S1PR4	DKK1	ALDH8A1	DGLUCY	ELF3	PCDHGA9
ADAMTS1	SIMC1	SYNE3	GYG2	PPP1R35	FN1
CSF1	SLFNL1	STAB1	PURG	MMAB	ZNF165
TIGAR	DOCK4	C9orf24	GDPD1	CA9	MED12
DDIT4	ADCK2	GDA	GFRA1	ANKLE1	ARID4A
DUSP6	AP1S3	SLC22A1	BMF	NMRK1	ZFYVE26
TRIB1	KCNJ15	SPNS2	KNL1	C11orf49	VMAC
HSPA1B	KIF3B	STXBP2	KIF15	EMC9	KIF24
FST	MESP1	GPBAR1	ZSCAN31	NRTN	SYT14
KIAA1211L	SRRM3	SORCS2	GPC6	DDAH2	TMEM178B
FAM43A	TGFB3	HEATR4	HYLS1	TMEM242	TENM3
ENKUR	SLC38A3	APOBEC3G	COLEC12	ZNF837	ARHGAP29
PCDH1	GNAQ	B3GNT4	GNAO1	SWSAP1	ZSCAN23
DEPP1	STARD9	MRC1	GTSE1	PDIA2	GRIP1
PLCXD2	PTPN13	IL12RB2	IL31RA	POLR3GL	ETFBKMT
RTL9	DOP1A	PRLR	SLC35E2A	FAM71F2	FGF5
SLC30A1	GREB1L	MAP2K3	KIF2C	KLC4	HOXB3
ITPRIP	RALGAPB	ATP6V1FNB	GBP4	SCG2	TTC30B
KLLN	SLC16A12	PTX3	SEC31B	MTFR2	DAB2
NDRG1	PTPN4	PPP1R3F	OCLN	SCX	ARHGEF17
NTRK1	ZNF662	DEF6	KIF11	SLFN5	AASS
SUSD6	SIPA1L1	GPR61	SHC3	FNDC11	USP54
RAB44	NOTCH2NLA	RPRML	IFIT1	C6orf141	CFAP57
SESN2	BIK	SSC4D	APOLD1	CDA	ARL17A
FAS	FAM149A	PANO1	RPGRIP1L	CBSL	AGO4
TRIM22	TIAF1	STKLD1	SLC29A2	SLC26A10	NUP210
PPARGC1B	SLC36A1	ATOH7	TUBD1	PEPD	LURAP1
RAB39B	FAM117B	GDF9	CTC1	TMEM104	CCDC173
NTN1	NHLRC1	KCP	ZNF572	HMG20B	NBAS
DLL4	LRP3	CLP1	PEX11B	LNP1	DNASE1
ZDHHC11	PPM1L	NUDT10	RNFT2	POLD1	LDAH
LIPC	TMEM121B	TULP1	NDC80	GAS2	ZNF891
RASL11A	TBXA2R	MISP	RSBN1	ALG14	SH3D19
HCAR2	KIRREL1	AC011448.1	TMEM71	PIWIL2	TLN2
CLDN14	PLEKHA8	LBX2	KNSTRN	SLC25A10	TNRC6B
ZP3	RGPD8	NLGN3	SLC4A8	COA3	KIAA1147
TMCC3	KL	ANGPTL2	CCDC30	COX6B2	PLSCR4
EPHA2	DLG5	LAMA2	CCDC18	EPHB2	USP28
ANXA8	CD33	CCDC62	FKBP11	GNMT	PARP9
SIK1	AP4E1	TMEM238	CARD8	SPAG7	YPEL2
RIMS4	INPP5F	MTTP	CGNL1	THYN1	CLCN5
ITGA2	CNTNAP3	MFNG	ZKSCAN3	GXYLT2	ZNF70
HMOX1	UBR1	CFP	GPRC5B	CLIC2	ZNF248
ICOSLG	UCP2	JMJD7	GLI2	HAGHL	SLC35E2B
AEN	TIAM1	LPAR5	SLC1A1	PEX6	KCNAB1
IL6R	IGF1R	C1QTNF1	CTPS2	TMEM150A	HMCN1
DTX4	SETD7	HPX	ASAP3	TCIM	CYP24A1
FAM83H	BMP2K	BATF2	IL34	DHCR7	GPSM2
TP53I3	ANKRD18A	ISG20	C5	DALRD3	SCRN3
SFN	MON2	NLRC4	SULF1	PALM	CPLANE2
TBX3	DOT1L	LAT2	NRK	TCAP	SAMD9
PLEKHF1	ZNRF2	C9orf152	ARMC9	CEBPD	ZNF66
FLRT3	IGFBP3	RASL10A	PAIP2B	THEMIS2	C1orf226
ZMAT3	SPOPL	SNAI1	TRIM62	TEF	PTPRG
ABCA1	STEAP2	CACHD1	SLIT3	ACOX3	RAB3D
N4BP3	VGLL4	RUNDC3A	RAB40A	AIG1	CFAP46
OPCML	ABCC4	CTSW	SLC25A27	PYROXD2	PPIP5K1
ABTB2	PNPO	JUNB	CC2D2A	HIST1H2AC	CEP162
ADRB2	RIBC2	PTK6	MID1	TMEM256	CALHM5
PRDM1	MSI1	PHKG1	CENPA	VAMP2	GIT2
OSR1	PAQR7	KCNK3	DTNA	SAMD4A	ADGRG2
SDK2	MGAT5	NAALAD2	ZMYM1	PNKD	ZNF471
CSF1R	SLC5A6	CABP7	USP13	RND2	GPR135
EPPK1	TMTC3	MYLK3	SASS6	OLR1	SENP8
SOWAHC	PTPN14	NKPD1	GRIK2	HMGN3	KLHDC1
ZIC2	NLRX1	TUBB3	NEGR1	DNM3	ZNF318
CD83	PPM1E	COL11A2	ABI3BP	IGIP	SGK494
PTPN22	PITPNM2	ZC3H12A	GPR1	HSD11B1L	CNTLN
NR1D1	ZNF695	ESAM	NFATC4	RIDA	IFT172
PSTPIP2	MANEAL	SPRY1	RHOBTB3	ARL14	WDR17
NFATC2	RCBTB1	PSD	SNX29	HMGB2	WDR27
KCNJ2	TP73	SLC26A8	RBL2	PLEKHG4B	DDX60
SNAI3	FKBP5	WDR86	LRRIQ3	CYS1	KLF12
IER3	VSIG2	NHLH1	MYEF2	MYH15	SETDB2
PROKR1	SLC28A3	TYMP	CDCA2	CFD	BRD3OS
KBTBD8	RAVER2	PMEPA1	TBC1D5	POU6F1	TNIK
SMOC1	LDB3	PTPRH	NR2F2	TRAIP	ZNF571
PLK3	TULP3	AQP3	PEX11A	SARDH	VPS8
FSCN1	TEAD1	SCUBE2	IFT122	ALKBH7	LRRC37A
CBLN2	LHX4	RGS20	INTU	KIAA0319	PPIP5K2
LYNX1	SLC4A4	LGALS4	TTC8	PFDN6	GSTCD
LRRC4	CEP164	SYN1	CCDC169	ABI3	NEO1
CHST2	RASAL2	TTC9B	ST8SIA6	ECI2	AAK1
PPP1R15A	C1orf74	BCL2L15	CPM	ARV1	SMARCC2
KLRG2	FAM129A	PADI1	LAMA3	RLN2	TNS2
VWCE	TNFRSF11A	KLK14	CCDC150	DHRS3	EVC
PPM1D	STK32B	HGD	KIF23	C20orf96	DIS3L
SEMA7A	ATP8B1	DOK2	WDR19	SSPN	SLC46A3
RNF152	ARFGEF2	LRRC73	MYPN	CLEC2D	SNX27
TNFRSF10B	DMRTA1	NRG4	HJURP	ZCCHC24	PLCG2
TNFRSF10D	EEA1	ABCC2	BRIP1	NOG	SLX4
ACAP1	MEGF9	TNK1	WDR60	CAPS	AMOT
WNT9A	MAP3K9	FJX1	ZNF714	PDLIM2	GLG1
SERPINB2	PLK2	PLA2G4C	ZSCAN30	NUDCD2	GIPC3
AC007906.2	ARHGAP21	PALD1	ACCS	C15orf65	ANKRD30B
FOXC2	KLHL8	AMZ1	CLIP3	HSD17B6	COL1A2
CPNE5	LPAR1	MCMDC2	MMACHC	ZSCAN5A	ZNF618
MAFF	OPHN1	CNKSR1	SPA17	BEAN1	CLASP2
C11orf91	EGLN3	ST8SIA1	CDC25B	LUM	DNAJC16
RAB38	TLE4	TECTA	KIF5A	MSC	ZNF221
PDGFA	USP4	PALM2-AKAP2	WDR31	CPNE1	EPB41L5
MYO10	TOP3A	HIST1H2AE	CEP126	SMKR1	KIF27
LECT2	RIPPLY3	FEM1A	CAPS2	ENDOV	TMEM117
CCRL2	CMTM4	RND1	FAM135A	TSLP	ALDH5A1
TRAF4	ZNF699	ENO3	DCAF8	WFDC3	PDGFD
HIC1	MPP6	GABRR2	DYSF	SH3RF3	SOGA1
KCNJ12	APLP1	TBC1D3G	SLC17A5	COMMD6	HLTF
THSD1	MID2	DNAJB1	NCAPD2	KYAT1	DDX60L
SULF2	SPIN4	TREX2	CAPN5	HMBS	FAM69A
CPEB2	GNL3L	SH3TC1	ABCA3	FAM72D	NFIB
FZD8	ZNF473	GPR68	DNM1	MFSD12	PAFAH2
TNXB	SYNJ1	SLC27A5	AGL	GLIPR1L2	ZNF594
EXOC3L2	ZNF774	DDIT3	COG6	C3orf18	GKAP1
IL1RL1	HOMER2	NPY1R	C1RL	B4GALNT4	FBXL20
YRDC	CAMSAP1	KCNS1	CCNB2	ING4	MSI2
EGFLAM	FZD3	2022-03-11	PRKCA	DNAAF3	PAPPA
IGDCC4	CERS2	KDM6B	DZIP3	EBF4	SULT1B1
FP565260.3	CREB3L2	TENM4	SMC4	ASIC3	ZNF362
DUSP7	ARHGEF26	ZFP36	EXOC4	PDLIM7	PRKDC
EPHB3	BAIAP2L1	OPRL1	ADAMTSL1	ROGDI	C2CD5
FBXW7	ADCY1	MPIG6B	ACBD7	PDHB	DENND1B
KRT15	MICAL2	OPRD1	DBP	UQCC2	SOS1
ESM1	ZFHX3	TM4SF19	GLCCI1	FIBCD1	TFAP2A
FAM83A	RBPMS2	ALOX5AP	ACSF2	LFNG	KIF13B
KCTD12	B4GALNT1	SRXN1	LRRK1	LHPP	TEC
2022-09-04	VPS13C	C17orf49	NEK2	UQCC3	GPNMB
B3GNT7	ZNF816	CSRNP1	GULP1	C1orf53	IPO9
RINL	STK4	LSMEM1	SPEF2	RPL22L1	USP9Y
HUS1B	PSME4	KIF17	FAM20C	ZNF726	ZNF512B
CYP26B1	ZDHHC5	CLDND2	RHOBTB1	NFE4	SLC26A2
NRCAM	PAQR3	NCR3LG1	GPR39	GSDMB	ITGA4
PLCL2	POLR1A	NEB	SLC25A42	IFITM1	MYH10
KLHL21	PAK1	UBE2Q2L	HEXIM2	SHF	CEP97
WNT11	CD24	DUOX1	ZBTB3	CNPY4	FMO4
TBX2	ZNF677	SLCO4A1	ECT2	GFAP	TCF4
GCNT4	NECTIN3	GADD45B	FYCO1	NSMCE4A	EPG5
NTN3	MINK1	NFKBIA	OSGEPL1	TNFRSF9	PCDHGA6
MFSD2A	ZNF324B	GPR156	ACP6	RBM47	R3HDM1
IER5	MYO6	SPOCK2	SEMA3A	NEK11	KCNIP2
TNFSF9	ALDH1L2	ROM1	KLF9	MAD2L1	RIBC1
GDF7	MOB1B	LEAP2	SMC2	BCL2L12	PPP2R3A
TCTEX1D4	TNRC18	CDC42	LRRC8D	B9D1	FAM8A1
TP53INP1	ITPR3	AL162231.1	NUF2	ALDH4A1	ATR
2022-09-05	FAXC	MEGF11	ZNF555	AIFM1	ZNF827
INHBB	ZNF311	SPNS3	ST3GAL3	NUTM2B	TTC30A
TRIM36	NBPF10	ACRBP	ST6GALNAC5	AP1M2	PTPRS
NUAK2	PPP1R13B	HIST1H1E	NCAM2	EFEMP1	TUT4
PDE2A	MGA	RSPH9	BBS9	FAM173A	ZNF521
BLOC1S2	ZNF583	S100A2	MIS18BP1	PCED1B	GCNT1
RND3	TEAD3	IL21R	CEP70	NUTM2A	MYO18A
TRIM35	KCNQ5	ASB5	HID1	DNPH1	C8orf44
C3orf67	STRADA	TSPAN31	ATF7IP	PAX8	TAF6L
CD274	RUBCN	CLDN23	ATP8B3	CTXN1	TRIM58
VEGFA	CEP250	SLC34A3	MYRF	SH2B1	DENND5B
CHRM4	FCHO2	PTGER4	SPACA6	ZNF358	TFDP2
NECTIN1	BMP4	ASGR1	CCNA2	MACROD1	PLEKHG2
CRYBG2	DHX34	GALNTL6	TSPAN19	C1orf54	GRAMD4
ZNF79	LMTK2	CUBN	FBXO16	ASB9	ATRN
TRAF1	CHD9	IL11	DIAPH3	FOXD4L1	MGAT3
KLF5	NXPH2	HSPB6	COL1A1	UBE2S	HSD17B1
IRF1	MERTK	CCDC38	PRKD1	AKR1B1	CACNA2D1
TRIB3	SLC26A1	GATA3	NPHP1	SLC2A12	EFCAB7
HEY1	DPYSL5	TMEM52B	MYLK	RHBDL3	ADCK1
C3orf52	VLDLR	LTB	STAC2	CNN1	DENND4A
FAM131B	PLXNC1	CYP27B1	ARMC4	DDO	NUDT12
DUSP14	SLC23A2	KCNG2	BRD8	NOX5	CUL9
TRANK1	KAT2B	KRT32	ZNF763	KRT7	CDKL2
GPR3	YEATS2	HIST1H2BG	CEP128	TLR2	SH3D21
VCAN	GNB4	EDN2	CKAP5	EFCAB11	LIPE
ANKRD33B	SPRYD3	S100A3	TMTC1	VPS9D1	KRTCAP2
HES1	ANKRD18B	KLF2	CERKL	OTOGL	LRP2BP
SNAI2	MAP3K3	NFKBIE	TMEM67	CUTA	MTR
TNFRSF14	KRR1	BATF3	MXD3	KCNE5	ZNF713
OAS2	ASAH2	TJP3	AGPAT4	PCSK4	UHRF1BP1
NKX3-1	PHTF2	CBX4	ARL15	HOXB9	HPS3
SIX2	PSD4	SCARF1	IFT81	TMEM132D	TP53BP1
EHD1	CASK	RHOD	BEND7	TCEA2	ZHX3
PLAUR	CTDSPL	VASN	HERC4	TRMU	EIF4G3
POU2F2	ADGRL2	NETO1	FAM227B	ARTN	ABI2
HUNK	SYNE2	CLN8	PRKACB	ZC3H12D	CTNND1
ENC1	AKAP9	ZNF503	SYCP2L	CLSTN3	EIF3C
DUSP10	PDE7A	ZNF34	ZC3H12B	MOV10L1	SMAD9
ULBP2	PUS3	TMEM159	MBNL2	FAM218A	XRN1
SLC9A1	PHGDH	TAS1R3	EGF	MIF4GD	AGO1
COBLL1	EML2	AC007240.1	SPAG5	SLC26A4	TICRR
PPP2R2C	CTBP2	TTYH2	E2F5	ARL3	HIP1
GAL3ST4	SEMA4D	FOXD4L1	NCAPH	OSCP1	ZNF214
PLIN4	PRICKLE2	SOX15	ATXN7L1	CCDC106	VPS41
BICDL1	TXLNA	SERPINA1	MAP7D3	TSPAN2	RNF157
BAK1	FMR1	RDH12	CD163L1	HACD1	BCL9
F2RL1	CBX2	MROH6	NTN4	IAH1	RGS7
KCNN4	CBLB	MEI1	PARP4	PIMREG	PSG6
BCL2L11	WNK1	SDCBP2	MEGF6	PHF19	LRRC75A
ADM	SRGAP2B	MAP7D2	OR2W3	HHLA3	PMS1
KRT34	TMEM209	CHIC2	JADE1	PJVK	CEP192
RPP25	SLC22A15	RASGRP2	GEN1	MSMO1	ZNF75D
WHRN	DSG2	DLX3	HFE	DYNLT1	DMXL1
C9orf72	CARMIL1	GLP2R	TMEM19	COQ5	UBXN2B
PLXNA2	UHRF2	RPL26	SATB1	STX1B	TMEM94
RNF125	ARFGEF3	TSC22D3	ST3GAL5	ROMO1	CNTRL
JUN	WDR91	ETS2	RASGRP3	FN3K	APBB2
GLTPD2	STC1	PRDM8	COL5A1	COL15A1	PHIP
ARG2	EFCAB13	SH3TC2	MTERF2	MYOM1	ZNF624
TMEM92	RBM12B	MRNIP	HECW1	ITGA7	MBD5
CXCL5	CPE	WNT4	ARHGAP12	ACOT13	C1orf50
PLD6	DIP2C	PBX1	SWT1	RBBP7	GIN1
DHRS2	PDE8A	DLX2	TPX2	SLC50A1	SUOX
PCDH12	ANKRD6	INTS6L	BAHCC1	CCDC107	EXOC6B
SPSB1	SNX15	SLC9A5	CDC25C	DECR1	PLCB4
KDM7A	TRPC3	HS3ST3B1	GRIN2A	MISP	PHLDB1
LYSMD2	SCML2	EIF1	REPS2	AAAS	VPS13D
RPA4	SHROOM3	ZNF596	CDK19	GSTZ1	SYNRG
MT1E	MTX3	KRT81	BCL3	SYNGR1	ARMCX4
STX6	SOBP	INHBE	TTLL1	TXNDC12	TECPR2
FAM189A2	SCD5	GFAP	VWDE	TRIP13	DOCK10
IRX5	RPS6KA1	CXCL1	NIF3L1	C4orf19	RFX2
INPP5D	ELOVL7	SAC3D1	LAMA5	PABPN1	PRKAA2
E2F7	ZNF841	CREB5	KIF18B	TMEM91	GCNT2
GBX2	LIFR	DIO1	KRT80	POP5	STK38
GCH1	CCP110	HES6	KDM5B	MPV17	CNTNAP1
PROSER2	PI4K2A	FAM131A	G2E3	LOXL1	SDCCAG8
AOC2	AUTS2	SMIM3	PNMA2	HOOK2	HUWE1
SYT10	STK24	PLPP3	TTC3	SAP30L	PTPRF
PAX9	GABPB2	MMP25	TGFB2	OCEL1	PCYOX1L
LST1	F2R	ANG	MUC1	CCDC85C	UGGT1
RAPGEF3	THAP6	KLHL35	SPTAN1	KIFC2	RHOT1
ZNF195	NACC2	SMOX	ARPIN	TMEM45A	GAB3
ISM1	L3MBTL3	GPRIN3	ACADSB	ACTR1B	ABHD2
STK17A	SLC12A4	AMIGO2	KCNMB4	PTGER2	NXPE3
CD82	NEMP2	AVIL	OXTR	KPTN	FGD4
PER2	KDM4B	MYLK2	PATJ	ATXN10	ATG2B
ZNF296	ANKRD36B	SRPX	TPCN1	KRT18	ICA1L
S1PR3	BACH1	MTFP1	LAMB2	ATP5IF1	CEMIP
PNP	MGRN1	SLC10A1	BTD	NYAP1	CLUAP1
HAS3	PLXNB1	IL20RB	LXN	RAPGEFL1	LINGO2
SORL1	SLC5A3	ENPP2	DLG3	H2AFJ	ZNF230
TMC4	ITSN2	TWNK	SLIT2	SH3BP1	ITSN1
HIC2	PLEKHM3	BFSP1	CAP2	DTYMK	CCDC14
SLC25A25	CCDC134	SQLE	IFT140	IMPA2	CHD6
STOM	ATL1	IER2	AGAP2	IL17RC	METTL15
METRNL	CNKSR3	PML	IQCH	CORO7	MACF1
AMER1	GPD1L	TUBB2A	GRK5	LRSAM1	CELSR2
TIMP3	GM2A	HSPA5	ANTXR1	BEX3	POLQ
UPP1	CEP76	MAP1LC3B2	KIAA0319L	FDFT1	ARNT
RTN4RL1	TNFSF15	DHDH	CFAP69	FUZ	PHLDB2
RRM2B	RASA2	KCNK7	PDGFRB	FZD7	PCDHGB7
SERTAD1	PRDM2	CGB8	TDRKH	PTDSS2	ZNF438
GALNT4	DTD2	MYH3	EVI2B	FYB1	CCNF
SORBS1	SHPK	FOXD1	MYOF	GGPS1	ATP10D
MT1X	LPAR3	TPH1	CUL4B	PPP1R1B	DNAJB5
KCNK1	RAB23	KRTAP2-3	DHTKD1	BORCS6	GTF3C2
GAL	MAP3K12	RAMP1	ADAMTS3	DPCD	NBEAL2
SUGCT	TMEM268	INKA1	UBA7	PIGBOS1	LRRC37B
TENT5A	METTL8	C6orf48	C17orf100	GLRX	KDM5D
TRIM9	TBC1D8	MOCOS	CPED1	LENG8	TMEM106B
NR4A1	LIMD1	CFB	CCDC102B	HSCB	FBLN7
PLCB2	TMEM63B	DNAH10	KIFC1	WDR97	SLC12A6
MSX1	BBS4	GPX3	PARPBP	TRIOBP	ZYG11B
TLE3	FOXN3	NRP2	RACGAP1	CHCHD1	TMEM245
SP6	MYORG	PROCA1	GRAMD1C	ARMCX3	NCAPD3
ZFPM1	PLCD3	GPAT3	LEPR	SVBP	CEP68
AL135905.2	ALAS1	NME2	RECK	DNAJC19	MNS1
BTG1	MN1	KRT17	ZNF839	LY6G5C	TBCK
TRPV3	SERPINE1	TTC23L	DEPDC1B	ANXA6	HTR1D
NINJ1	CHERP	GNRH2	D2HGDH	THOC6	TRRAP
CEBPB	ZNF335	GPR143	TMEM143	TUBA1C	ZNF138
APAF1	RREB1	PPM1M	CD37	SMIM30	C22orf46
MR1	DNAJC21	TACR2	TMTC4	TCEAL4	ZNF385B
PRKAB1	TMEM229B	NR2C2AP	RIMS3	EBPL	PXDN
PPIF	MFN2	CFAP53	DOCK1	WFIKKN1	FANCM
CDH3	WDR41	CCDC88B	SLC9A3	KCNAB3	DNAJC13
CA14	FOXD2	VKORC1	KIAA0556	TMEM38A	STK36
ZNF654	RGS12	RSPH4A	CEP112	IQUB	DOCK6
HHIP	TAF5L	TNFRSF1B	PPP1R26	KRCC1	SMAD3
KCNG3	SDC2	ZNF622	LAMB1	RPRD1A	NAA40
SDC4	SFXN1	MYLIP	CHN1	FAM229B	SYNGAP1
TMEM200A	UHMK1	KRT10	WDR92	NPDC1	NFASC
EID3	FMNL2	COL17A1	GVQW2	PPIL6	PDE5A
BHLHE40	RANBP9	PRSS36	ZNF554	UBXN11	TBC1D4
FOXC1	CIC	RPP21	ZER1	SLC45A1	POLI
RASGRF1	DUSP18	ZNF425	C1QTNF6	SLC35D2	MTOR
INSYN1	CDR2L	ZNF408	TROAP	OSBPL5	GIGYF2
IRF2BPL	MYO1E	SEMA4A	RNF207	PHYKPL	PILRB
PTCHD4	WASF2	TFB2M	HP1BP3	HTATIP2	CDC27
LZTS1	LYPD6	XBP1	LIX1L	TPM2	MUM1
TNFSF10	ZNF484	MAFK	CBX5	C6orf132	THADA
PFKFB3	SHROOM1	SYNE4	CDCA8	MND1	ERBB2
DPYSL4	SNX2	SLC31A2	TIMELESS	FAM167B	DYNC1H1
SLC20A1	MAP4K4	ATG101	ESPL1	RASGRF2	ITGA11
EFNB2	GDAP2	ADSSL1	EVI2A	MORN2	GPR85
MTHFD2	AKAP11	CHST7	SMAD6	PGM1	C6orf89
STYK1	PEAK1	SHB	NUSAP1	C11orf74	ZMYM4
RAP2B	SNTB2	PLPP4	DTWD2	ALG8	ARHGEF9
FLNC	SLC10A7	ASS1	SHTN1	KCTD17	CCDC125
SLC3A2	MFAP3L	HIST1H4I	CIP2A	SLC12A5	CDK14
CHST3	NBPF14	BRPF1	NFKBID	NAA38	LMBRD2
TSKU	EPB41	GRPEL1	MEIOC	PIR	ANKRD52
MAPKBP1	PRPF8	MYC	MAGI1	REEP6	TSC2
JPH4	C2orf16	AK1	ANP32E	TMEM14A	CEP152
SCN3B	FOXK1	C1orf162	PHKB	CCDC40	GALC
PTGFRN	POU4F1	COX8A	NECAB1	CTF1	ABCA7
SCG5	IRGQ	EFNA1	TXK	ALOX5AP	SNX30
MORC4	SLC6A8	PDRG1	CCL2	DHRS4L2	XPNPEP3
IRAK2	PRDM15	ZNF367	LRRC27	MYL9	MIA3
SLC7A7	2022-09-11	GNG10	PPP1R3E	MRPS14	R3HDM2
SPRY2	YPEL3	LRRC66	CDCA3	CCDC151	CPNE3
SLC49A3	ZBTB7B	DUSP8	NBR1	CCDC115	MAGEC1
TMEM64	YOD1	DNAH17	ABLIM3	LAMTOR4	ZNF480
ITPKC	MTMR9	ACTRT3	ACAD10	DCAF11	APBB1IP
SMAD7	DUSP16	TRIM8	HDAC4	MVD	RAB3B
CAPN12	PEG10	ODF3B	METAP1D	PTRHD1	NAPEPLD
EAF1	RMND5A	RP9	SMIM14	IFI27L2	CCDC39
HOXA11	NCOA2	DNAJB9	HIBADH	NDUFA2	ZSCAN20
PRKCD	NFYA	MCL1	ADAMTS12	TMEM129	ATP9A
OR10A6	MED13L	NAGS	ELOVL6	VEGFB	TTLL5
EDNRA	NCS1	ZFAND2A	THAP8	PMPCB	PTPRM
BCL2L1	USP46	ISL2	EFHC1	ATP5MC1	PER3
TFPI2	RHBDD1	FAM222A	DPY19L2	LSM5	CEP290
PITX1	C17orf58	ADAP1	ADAMTS2	MIIP	C18orf54
FZD9	DSEL	GNMT	HDAC6	DXO	SMC1A
RGL1	TCOF1	CGRRF1	FAM114A1	NDUFB1	PKD2
LAPTM5	RPS6KA5	P2RY11	ZRANB3	HAGH	PIK3C2B
FAM89A	CCDC90B	GFPT2	BCKDHB	PLEKHA4	PI4KA
PLEKHG3	STAM	HNRNPAB	PPARA	MRPS24	AATK
TMC7	HSPA8	RARA	MAP2K5	GALK1	ZNF609
TRIM26	ADAMTS6	MIDN	EXOC6	GTF2H5	ANKS1A
ARHGAP4	IQCB1	GPS2	JPH2	GLS	SSBP2
COL10A1	CASP7	MARS2	SCLT1	CISD1	2022-03-01
PCNA	FNBP1L	NOP16	RFX5	C1orf56	TARBP1
CT62	PLEKHA5	MAFG	AHRR	PLEKHJ1	MAML2
LBH	NBPF12	TWF2	MCCC1	LYG1	USP24
PPP1R3C	ATAD1	RNF32	EDIL3	SLC25A43	EPB41L2
GPR75	KIF1B	ETV2	EML6	RAB13	FAM102B
RTN4R	ZFP28	LYAR	CLCN6	SAP30	DCAF5
DYRK3	OTULIN	NFKBIB	MILR1	OGFOD3	ZFP3
FZD1	CLN6	WDR74	FOXO4	MTRF1	ROBO1
GPCPD1	ODR4	ITPRIPL2	TMTC2	ZNF784	STXBP5
SLC35E4	ZNF518A	ACBD3	PCDHB10	SPEG	GABBR1
TRIAP1	ZNF74	HSPA1L	FOCAD	STX4	CEP57L1
IRS2	ZNF765	LCP1	USP44	IFT57	ZBED8
DNAH1	GRAMD1B	TRAPPC5	LYRM7	ETFB	FAM173B
MARVELD2	EEPD1	FAM241B	USP40	CKS1B	AHCYL2
RFK	IPPK	ANXA8L1	PC	SDR39U1	ZNF589
LSP1	GSK3B	CLU	PCDHB14	KATNAL2	PCLO
FAM84B	CYSTM1	CLCF1	PIGN	MITD1	LRRC37A2
ABCA12	TGFBR3L	SLC25A22	LCTL	MMP7	NMNAT1
POLH	ACP7	DNAJB2	CLHC1	RCCD1	ATP6AP1L
ESRRA	FCHSD2	MED26	NALCN	ZHX2	GLIS3
CNNM4	GYG1	BAMBI	PRC1	RPUSD3	FAM86C1
ZNF488	RBBP8	HMGA2	RAB5B	CDC26	CLCN3
TINCR	ZNF417	FAM110A	ATG4C	IDI1	GNS
DUSP11	SMG6	SH2B3	IFNE	FBXL15	EXD2
RBM38	ASAP1	SLC25A33	ZNF500	IL11RA	ZNF382
DUSP9	FOXP4	AP000944.2	ADD3	FKBP3	VPS52
LHX6	TSHZ1	NIFK	CCDC113	SERPINB6	KLHL36
SOCS3	FAM168A	UBL5	AGFG2	ELP5	NRXN3
VPS37B	HSPA2	BAIAP3	CDKN1B	TCTE3	ZDHHC2
FZD5	YAP1	IRX3	ZNF395	BABAM1	AKAP13
SLC12A7	ATP2B4	SRSF7	TLCD2	LPCAT2	MED7
PRAG1	SLC2A1	RPS29	ECHDC2	TPGS1	TMEM56
HRAS	DDAH1	KAZALD1	RAB26	MUS81	TMEM8B
NOTCH1	OSBPL8	POLR2H	MANEA	ACOT8	IRAK1BP1
C16orf87	TMEM246	PCDH18	CREB3L1	CNIH3	SLC38A7
STX1A	ANKRD44	SPX	NUCKS1	OGDH	NXF3
NNAT	PUM3	NDUFAF4	ANK3	PDK4	ALG10
RALGDS	MYO1B	NAB2	NEIL3	NPIPB15	STRBP
CDC25A	ONECUT2	RGS3	FANCD2	CHRNB1	PRDM5
RIOK3	RNF38	GTPBP4	DDX17	GCA	RGP1
WDR43	STPG1	NET1	CACNG7	CHCHD5	CPD
FOXD3	CDYL2	CTU1	ARHGEF6	EIF2B1	TPR
ODC1	DNAJC1	PHEX	ERCC6L	RHBDL1	CDC14B
FOLR3	B4GALT6	RELB	LANCL1	HIST1H4H	VPS50
SPHK1	HACE1	ERRFI1	ZSWIM1	IRAK3	ARL6
TBX20	CNOT6	TNFAIP8	NREP	PPA2	ZNF613
PPP1R3G	LRP12	CYP51A1	HOMEZ	TUBB2B	GREB1L
BTBD10	PDPK1	PSMB10	SFI1	CLIC6	PCDHB16
ARHGEF37	CEP83	MCF2L2	BTN3A2	CRY1	INTS9
ZNF703	ST5	KCTD5	SMARCA1	PIN1	ZNF607
GCOM1	FOSL2	LRFN5	MYH14	H2AFX	TARS2
TET3	RAD54L2	NFKB1	GTF2IRD1	POLR2J3	ZNF556
CES2	PRPF18	ZBED6	SLC18B1	RRAS	HOXC6
KCNC4	TNKS2	ETV4	FAM117A	ZBTB12	SMARCAL1
COQ8A	CFAP45	STBD1	SUGP2	MVB12A	TCAF1
SMTN	ARHGAP42	EEF1AKMT4	SERAC1	DHRS11	ABHD6
VPS37D	RANBP10	ZNF670	MRC2	FAM216A	SFXN2
SRA1	SEC22A	TUSC1	ARHGAP18	TMEM175	B3GNT10
KRT33B	ZC2HC1C	RRS1	FAM133A	SHISAL1	ATF2
CGAS	ELOA	VSTM2L	BTN3A3	ASIC1	WDR5B
ZNF468	SENP6	HSPE1	PDK2	COL16A1	SLC9A7
TRIML2	ROCK1	RRP9	PROS1	ALDH2	SARS2
FSCN2	HPS5	ZNF597	TCTN2	BST1	DEXI
CYP4F11	CAMSAP2	MMP9	AP3S2	HIGD2A	FTO
RUSC2	DCTN5	EIF4A1	NCAPG	NR1H3	UMAD1
YBX3	C2CD3	POLR1C	2022-09-06	ARL4A	TMLHE
TAP1	ZNF668	MANF	FAM72A	RABAC1	UBE4B
RBM14	NIN	ZNF787	RHPN1	SLC35F3	SPRED3
TGFBR3	BANP	COX19	DPYSL3	CASP9	HLCS
CTGF	TMEM184C	SPON1	BBS12	ARFRP1	BTN3A1
PALM2	AFF1	ATP6V1C2	KPNA2	GABARAPL1	TTC12
CPEB4	FAM171B	COPS9	ZNF627	COMMD4	DDHD1
ELL	RIC1	SLC37A2	AFG1L	TLX2	TUB
BLCAP	DTX3L	SLC26A4	ALCAM	GPR162	FBXL2
NRARP	XK	MAP1LC3B	DNALI1	SNX17	ABRAXAS1
IFFO2	MMS22L	SPATA5L1	DCAF6	RNF5	ITPR2
EPAS1	CCDC15	SRSF8	AC005726.1	CNPY2	NCOA6
CCND1	EFNA5	FAM207A	CRYBG1	ARHGAP33	ERBIN
MEX3B	KDM2B	FBXO44	C7orf31	ACTG2	PAPLN
NEDD9	F8A1	SOX4	LRP8	TTLL11	RAB9B
C2orf72	LRP11	MED10	CHD3	TMEM126B	WDFY3
APLN	RXRA	RPS10	KLHL24	EIF2D	CD109
TNFAIP8L3	SP100	C16orf72	VPS33A	BBIP1	VASH2
SMIM13	SLC35F5	RNF144B	PIGZ	YIPF5	MUT
AKR1E2	PLEKHA1	C1orf52	EME1	PPM1M	USP34
PRKG2	TMEM131L	ATF4	H6PD	CDK5	DRC3
CEP170B	LMCD1	CITED2	NDRG3	MEIS3	MICU3
BEND3	KCTD9	GSTO1	GLRB	LDOC1	TLN1
LHX2	EPN2	PDK4	TACC3	SLC2A6	RNF214
CRABP2	CHORDC1	ADO	CDKN2C	RILPL2	NME5
ZNF469	USP37	VCPKMT	SIPA1	CYB561A3	TCEANC2
ETV3	MLXIP	SLC39A14	REC8	FAM234A	PDK1
PRSS3	TBC1D13	OCIAD2	GABRA3	ENPP2	ATP11A
SLC35G2	ATP6V1D	COL4A6	EVI5L	SLC29A4	BDH1
MRAS	CNKSR2	SPATA13	KIF7	SMIM19	ADAM12
LEF1	PCDHB2	SDE2	TRIM46	SORD	RAD17
ZNF30	ZNF485	RAB3A	ITGA1	PPP1R16A	RBM43
USP18	ZFP90	THAP2	SSTR1	C19orf70	BTN2A2
KIAA1324	CASP2	MED17	ADAMTS10	ERMAP	MAP9
WDFY2	POLK	TLX3	RCN3	ADAM8	FMO5
2022-03-03	IGHMBP2	TMEM243	RTL3	C1orf123	PIAS3
PROCR	EPHB4	MRPL12	KCNT2	C5orf34	DNAH11
PIP4P2	KIAA1549L	ATP5ME	C4orf33	TMOD1	CENPC
SGK1	FICD	COX6A1	C2orf68	TCEAL3	ERMP1
CDK5R1	SAMD5	DNHD1	COL5A2	CPA4	RABGAP1L
TSPAN1	AGAP1	RAB33B	CCDC80	STYXL1	KIAA0100
NKAIN1	MAMDC2	SPTSSA	LACTB	CCNA1	SEMA5A
TGM1	RAB40C	HERPUD1	VAMP4	EXD3	SYNJ2BP
DLX1	MAPK7	TOB1	SV2A	DPP4	BBS10
CAV1	ZNF527	TNIP2	CCDC163	SNAPC5	DOCK9
NQO1	SUSD5	SLC19A2	NUDT16	LARP6	ARID5B
AVPI1	MTSS1L	LY6G5C	RNF170	LUC7L3	COQ9
IL7R	TACC1	POPDC2	APLF	IKBKE	AASDH
ZNF239	ADAM23	HES4	ADAM22	WDR13	TRPS1
KCTD11	DGCR8	NTNG2	NOSTRIN	TTC32	RTKN
ANKRA2	TMEFF2	NKX6-1	ARMCX2	IFIT2	BTBD9
TNFRSF11B	DDI2	CDKN2AIP	ARHGEF39	RAB24	UBR4
NOCT	ZKSCAN2	ZCCHC3	MKKS	FLOT1	ERCC6
MRPL39	SPATS2	SMCO4	FOXM1	FKBP7	ABHD18
SCNN1A	PPCDC	ASB3	FAP	PNPLA4	KAT6B
CALB2	TRPM7	HLA-DMA	LZTFL1	SIRT5	DTNB
CASP3	NRROS	UBC	STRADB	ZNF251	TTC37
GAREM1	NEU3	CEBPG	ENTPD1	ZNF428	MTBP
CGB7	MKLN1	KCTD15	LRRC20	MED11	TRAPPC11
LRRC8C	HARBI1	NSUN5	TMEM187	FBXO10	LIG3
AC090360.1	AHDC1	PANK2	KLHL22	GSTK1	MBTPS2
TAF3	TCF20	EIF1B	CDC20	LIMD2	KAT14
SEMA3B	CHML	CCDC183	FZR1	CCDC88B	ARHGAP32
RRP12	MICALL1	LBHD1	ZNF76	ZNF771	BICC1
ZNRF3	OSBPL10	RPIA	BRCA1	NUDT16L1	MTHFR
PODNL1	ESYT2	ITGB4	WIPI1	DNASE1L1	ACACA
RTL5	LIMA1	SLC16A1	MFSD14C	MAP3K7CL	MRE11
INPP1	SNTA1	MRTO4	PCBD2	ZDHHC1	CPA3
NAMPT	ZFR	NIP7	DENND2A	TRIM16L	SPTBN2
CLCA2	TBC1D9	PITHD1	ATG10	GLYCTK	CABIN1
NFKBIZ	POLR3A	S100A6	CXADR	GPSM3	FKTN
KIAA1586	MNX1	CCDC86	CACNG4	THBS3	PRUNE1
ARL4C	MMP16	MOCS3	KIZ	PTPA	ZC3H10
HAP1	FANCA	RPS21	FANCL	VKORC1	TBL1XR1
CCNK	ZNF562	EMILIN2	CAMKMT	PRMT2	TIA1
EPB41L4B	PUSL1	YDJC	ADAM21	SNAPIN	IGF2BP3
CABYR	NIPA1	LSM7	TTC23	FAHD2B	NCKAP5L
ANTXR2	NAP1L5	COL5A3	SAMHD1	PCSK1N	ANKRD44
KLF6	DCP1B	KTI12	CRYGS	GALT	ZFAT
TMEM68	STXBP1	ZNF316	TAB1	SLC35B3	KDM4C
B3GNT8	TCF12	KANSL2	WDSUB1	PSMB10	WDPCP
BYSL	TMEM168	DGKI	ACBD4	SPIN2B	MPHOSPH9
B3GNT5	BVES	FOXO6	PPIL2	PMF1	TOP2B
SEMA3F	HSDL2	TFAM	CCDC77	GCDH	NCOA1
KSR1	STRN	PTGER2	PDE4DIP	C5orf46	ARHGAP24
HTR7	TTPAL	RPS28	COPG2	PTMS	TBC1D31
ZNF600	MAST2	FGFR4	PBX2	MYL6B	NACAD
C2orf88	IMPDH1	C18orf32	SGO1	TSR3	HMBOX1
EFCAB10	HELLS	NDUFB2	NCAPG2	ALPK2	EHHADH
PCDH9	SLC4A7	TSLP	IFT74	HPF1	SKAP2
ABHD5	NFATC1	ROBO4	SYT1	AKR1C3	ALOX12
PANX1	CERS5	NOG	ZNF599	KBTBD11	SPATA5
NCEH1	PHRF1	ISOC1	GPR137C	HCFC1R1	VPS54
SPINT1	C5orf22	TCAP	AURKB	UQCR10	MEIS2
TGS1	CNNM3	VDR	TOM1L2	NUBPL	LAMA1
SH3BP5L	SMG7	FRAT2	DPY19L3	GALNT10	PCIF1
C15orf39	MED15	CRAMP1	GMPR	IRF3	TTLL7
TSPAN14	ZNF470	NSUN2	SEMA6C	TRAPPC6A	CREB1
ADRA1D	SIKE1	ICAM1	PACS2	ARHGDIB	TRO
PIDD1	AKAP1	DRD4	PLEKHO1	MCRS1	ZNF652
SLC8A2	GMEB2	USP43	GPR155	PNRC1	ARSD
CASP1	ZNF347	SLC43A3	C11orf54	RTL8C	MYO9A
PLIN2	PCNX4	AKAP17A	SYT11	PLGRKT	SLC30A6
ZNFX1	FOXJ2	CLDN15	OBSL1	DHRS4	COX15
ISG15	TSPAN5	PDXP	PECR	REEP5	CENPJ
C12orf45	EMSY	TIGD3	LRRC6	CSPG5	ZBTB18
CHAC1	LRRC57	SLC15A3	KDM4D	GPX3	PPP2R5D
SLC1A5	TSC22D2	MZT2B	XRCC1	MOXD1	ZFP62
DHRS7	SFMBT1	UTP3	FAM72C	DBN1	ARHGAP6
PIK3R1	FANCE	CORO2B	ARL6IP5	JDP2	DROSHA
C3orf58	NABP1	RSL24D1	RPH3AL	FAM45A	GOLGA8A
AMPD3	CNOT6L	HIST1H2BD	FUK	CLTCL1	SPTLC2
FUCA1	KCNIP3	GOLT1B	ZNF404	USP5	ZNF483
PANK1	RB1	SLC35C1	SH3PXD2B	GSTM3	ANKRD26
SOX9	SALL1	CCNT1	ZNF117	TXNRD2	RBFOX2
BTBD19	ZNRF1	JCAD	BBS2	AMPD2	CCDC136
TJP2	IPO7	HNRNPF	BDH2	CAT	CDK5RAP3
RNF114	NBPF26	SNCG	TMCO4	HEXIM1	DSC2
CHST11	2022-03-08	ZNF263	CKAP2	PPFIA3	ANKRD18B
PTK2B	CD46	TNFSF13	REEP1	PIGU	ABCA2
DDX21	MOB3A	RSL1D1	SLC25A23	STX8	PFAS
KCNG1	ZNF407	CNBP	GALM	PRSS16	HERC2
SLC16A6	PDE12	RYBP	COG5	SNRPN	PHF6
PPP4R3A	PPME1	EDN1	HSD17B11	YIPF2	GFI1
NT5DC3	ZBTB14	NUTM2D	FSTL1	ZSWIM7	NNT
RCL1	FUT10	TP53RK	SGSM2	THAP10	SCRN1
NUPR1	TMEFF1	ARF6	MATN2	HAUS8	USP19
MFSD4A	PPP1R10	SLC25A28	NIPAL2	TMEM218	LARGE2
ZNF672	ZNF708	PELO	PNPLA6	FKBP8	ZNF85
PID1	FAM20B	EBI3	IQSEC2	UBL5	WNK3
PLEK2	SPIRE1	RPL24	TAF8	FAM122B	USF3
CD44	NCKIPSD	CCNG1	FANK1	ANXA1	PSIP1
RNF138	UBE2H	ZNF598	ERCC2	CD9	NR6A1
TAF13	RTTN	TNIP1	FIG4	NDUFS2	ZNF793
GLYATL1	ZNF548	NXT1	NEK6	HOXA1	L3MBTL3
PIM3	CLCC1	HTRA3	SPACA9	ISOC2	N4BP2L2
LAMC2	JAK2	DBR1	TTF2	NPEPL1	PRR12
KHDRBS3	ATAD2B	IER5L	NDC1	SHISA4	EHMT2
SERINC5	MAPK8	TXNDC17	OLFML2B	TAGLN	RGS17
ZNF28	MPRIP	SLC25A38	TECPR1	MYL6	MYBL1
NATD1	PLCE1	EVA1A	IQCK	PSMG4	DHX57
GXYLT1	DZIP1L	RABGGTB	PAM	FBXW4	NPEPPS
RCC2	ZFP1	SELENOS	ZSCAN16	UBXN6	INTS3
ARRDC2	EXT1	EEF1AKMT1	HOOK1	QTRT1	MBTD1
CISH	AHCTF1	HRH1	CEP55	BPHL	DSN1
BAG1	TMEM33	KHK	AXL	AMH	FBN2
RIPOR3	DYRK2	INAFM2	CLIP4	SLC39A11	HACD4
KLF13	KIAA2026	RPL38	PKN3	NT5E	JRK
ELAVL2	PKNOX1	CIAO2B	BBOF1	LPCAT4	NBPF3
ABHD4	SPECC1	SLC16A3	RWDD2A	DCAF4	TNS1
IL2RB	CDC42EP3	RHOBTB2	SLC41A2	RNF7	TIAM2
AADAC	MOV10	ARMC5	PLK4	DPY30	FAM161A
ZFP36L1	RBM12	ZNF317	C19orf66	TRABD	ZGRF1
CHRNA5	NPAT	LY6K	COG4	NSMCE1	SLC16A4
FOXA1	RUSC1	B3GALNT1	FBXO36	TRNP1	DDHD2
TOR4A	HSD17B12	FAU	DLX4	TAZ	CTSS
ADRM1	SLC40A1	FBRSL1	ORAI2	CPNE7	LYPD1
DSC3	TMEM65	NME1	FAM189B	SIGIRR	SSH3
NGF	CTPS1	TYRP1	GALNT7	TRPC1	ALMS1
CCNE2	AARS2	PRELID3A	NPAS4	CCDC102A	APH1B
ZNF697	RHOF	HS3ST3A1	TMEM184A	NDUFB7	DLG1
CCND3	SLC2A3	LLPH	SRPX2	DCTN2	LCORL
SDC1	BRWD1	KLF16	DYNC2LI1	HTRA1	NID1
CSGALNACT2	ZNF197	USE1	DMD	FGGY	NSL1
BRMS1L	KLHL20	ELOC	ARSG	SYNGR2	FPGT
USP53	WRAP73	CCDC59	NLRC5	FIBP	CCDC149
ZNF746	GUF1	CPSF4	CDKN3	TRADD	CCL28
BCL10	TM7SF3	NFIL3	TRHDE	MIS18A	CRIM1
ZNF385A	ZC3H18	PHAX	CHST12	DPM3	SLC30A9
ACTA2	KIF5C	FASTKD5	SAMD11	RABL6	ENPP1
TLE1	PLXNA1	FHL2	TRIM69	COPS6	PSG9
HSPA4L	RASSF5	FKRP	RECQL5	TRIM16	PCDHB11
DEPDC7	ALMS1	DBH	PCYT2	GSN	ARHGAP35
ST3GAL4	DCAF12	NKX2-6	WASHC2C	GLIPR2	YTHDC2
IL33	PDE4B	QRICH2	ZFC3H1	DAPK2	MTMR4
FBXO22	ENO2	CDCA4	ALDH3B1	FAM162A	PACS1
PLXNB3	PIP5K1A	ZNF773	CCDC138	STK16	EPB41L1
ARVCF	ZNF18	CEBPZ	TTC31	CDC42EP1	HERC1
KIF21B	SIGMAR1	SIRT6	METTL4	HSP90B1	ZNF43
KLF10	MAP6	TMEM217	AGER	HSPA5	NEK1
KLF11	VAPB	NOP2	NTNG1	LTBP2	AKT3
TMBIM1	NRIP1	ABCC3	OMA1	CTSF	AKAP2
SIX1	SMO	MAGEA3	MPST	DNASE1L2	NEMP1
TRIM11	KMT5B	MRPL18	LSS	STAP2	PREPL
NUDT11	UNC13B	GNA13	RSPH3	JTB	NFIC
GPC1	IGFBPL1	ZNF710	TFPI	TST	CSTF1
BAG3	WDR17	UBAP1L	UGGT2	NUDT1	GTF2I
SLC41A1	PELI2	TMSB15B	PIANP	CDK10	SLC35B4
KBTBD7	SRRD	LYRM1	TMEM53	COQ2	STAT1
FRS2	RUFY2	PFDN2	ARHGAP19	ANKS3	SLC30A4
ZNF275	SLC37A3	CLTB	COL4A2	KIF9	STX7
TRIM47	MOSPD1	ARL8A	DHX32	DNAAF2	HACD2
PDE3A	SETMAR	MRPL52	STEAP3	ITGAE	XYLT2
FAM208B	GATAD2A	ZBED9	PCBP3	IFI27L1	APOOL
IL7	LYPLA1	NOP58	TMEM241	FSD1	UBE3B
DCLRE1B	SMG9	SUPV3L1	ICK	IDH3G	CLEC16A
CLDN4	POGK	ATP6V1E2	HASPIN	PGLS	BPTF
MMP14	MTHFD1L	PBDC1	CKS2	GHDC	CPLANE1
ZNF324	ZNF236	MT2A	RSRC1	SIGLEC15	AMIGO1
IRF5	RAD54B	POP7	HBP1	ROBO4	CABLES2
SYNPO	FAM210B	LRFN4	TBC1D3D	MAP4K2	CCDC66
FEM1B	GAREM2	DBNDD2	HSD17B4	FBXO17	ACTBL2
PLEKHG1	RCOR2	RNF126	DBF4	AKR1A1	TXNRD3
MAPK6	KIAA1841	PRNP	LOX	BIRC2	MBOAT2
TXNL4B	TRIM68	APOPT1	WFS1	TMEM14B	SYTL2
ETNK1	ATG4A	TIMP1	TBC1D9B	CENPH	PCYOX1
TMEM158	RAB3GAP1	ZNF26	SPC25	TMEM217	C1orf112
TLR3	ARHGAP10	LHX1	AMN1	NAXE	GOLGB1
FRMD8	TMOD3	MAPK8IP2	IQCD	TSEN15	SLC27A3
CDKN2B	BDP1	TMEM70	CALCOCO1	C1S	RUFY3
FRMD6	EHD3	TNFRSF12A	JMY	CCM2	SHPRH
PARD6G	FAM120AOS	ZNF513	HEXDC	NUP107	RB1CC1
IFNGR1	RMC1	RBM22	PAK3	TMEM230	MFSD8
PTPRU	DLST	MXRA8	RNF141	C1orf216	ZNF638
RCAN1	RNF14	EMC6	AK5	PSMB9	PDP1
UBASH3B	FAM234B	LRRC3	FBXL17	MIEN1	WWC2
EPHB1	STIM2	RPL37	LMBRD1	URM1	RUNX2
DENND2C	ZNF343	LRRC8E	SPAG16	CYBA	LRFN1
FGD6	RICTOR	ATAD3B	COX18	SMS	KIAA1671
APOBEC3C	RALB	RNF4	GLT8D1	OXLD1	MICU1
CEMIP2	ZNF813	TBPL1	CNTROB	APOE	EXOC2
IKBIP	MED20	STC2	FBXW8	JPT1	ZNF514
TSPAN10	IBA57	ATP6V0C	BIRC5	CITED4	APC
KDSR	KRT19	CD14	RUFY1	MPDU1	PIGM
DRAM1	NAA50	CYCS	CHRDL1	EPM2A	MDC1
MFHAS1	PLEKHG5	ZBTB43	GLB1L	TUBA4A	TNFRSF19
GFOD1	UBE3C	ARFGAP1	CRAT	WBP1	CTH
ABL2	LATS1	RNF6	TBKBP1	TSPO	DRP2
CYP2S1	CPT2	MTLN	ARL6IP1	ANKDD1A	PCDHB9
SIPA1L2	BRD4	UBIAD1	MFN1	OTUB1	SEC14L1
DMRTA2	NFX1	MAPK13	VEPH1	PIN4	VANGL2
UCK2	ANKRD26	SNRPB	CORO6	RDH11	ATF6
TTC4	PFKFB2	ZFYVE27	C22orf39	HMGN5	SEMA3D
FOXF2	PRPF4	S100A10	SLC12A8	ANAPC11	VANGL1
CDK17	CCDC43	FHDC1	OSBPL7	NDUFB5	ZNF331
BTG3	DOCK5	ATP2A1	NUDT6	TMUB2	ZDHHC23
SOCS4	UBR3	ZNF511	SUCLG2	ECSIT	TDRD3
MTA2	NHS	CFAP20	TGIF2	CADM3	ALAD
ZNF451	PPP2R5A	PUS1	L1CAM	ZNHIT1	TMEM106A
COL27A1	RAB14	GRPEL2	LIMK1	RGS11	ATG16L2
CSNK1G1	PRR14L	PHPT1	PGGHG	PKN1	WASHC2A
MAK16	KIF16B	BCL6	APOL1	DHRS7B	KCNMB3
PERP	SLC25A16	AP4S1	PHF23	TMEM219	BRCA2
USPL1	GLIPR1	ZNF256	OIP5	MZT2B	MARF1
HIVEP2	RDH13	RFTN1	AMDHD2	CYHR1	RAB3IP
TIMM23B	CCDC82	PRPF39	FAM72B	TMEM42	DMXL2
SLC10A3	SS18L1	ADTRP	ARHGEF25	PTOV1	CYP2R1
TSC22D1	GMEB1	PGBD5	PCDHB5	PMVK	SLC24A1
EPS8L2	MAGEE1	ARPC5L	RNF26	UBOX5	GOLGA2
ASCC3	EPOR	CLK1	TRIM6	RSAD1	UBN2
RAB27B	UTP20	PXDC1	SLC25A35	ETFDH	NFS1
HRCT1	CLMN	ALKBH2	METTL25	GBP1	AP5B1
ADAMTS5	PARD3	TMEM11	LZTS3	CTSO	APBA1
CTHRC1	DCAF17	DKC1	CRYL1	HIKESHI	ZNF573
RASEF	STXBP3	ITPA	ANXA3	NES	MTHFSD
IQCJ-SCHIP1	HIPK1	OGFR	EFNB3	TM7SF2	TRMT10A
PELI1	BRAF	TOLLIP	TRMT2B	WDR54	ATG2A
TMEM151A	NBPF9	RHBDF2	PHYHD1	RILP	ATP6V1A
BCL9L	TOR3A	SETD9	VPS45	TSEN34	N6AMT1
HK2	TIMM21	MRPL32	SLC16A2	PPARG	SNX19
RIN1	ZNF282	CSNK2B	PHOSPHO2	MFSD10	NCSTN
ZNF667	PRKD2	RBM15	CNRIP1	ACO1	PIGV
DPF1	TEX2	SRP19	SHCBP1	C8orf88	ARSJ
BAX	PHF3	SURF6	IFT88	FAM149B1	PTPRA
CEP85L	GAB1	IP6K2	HMGCL	C11orf68	PLS1
GCSAM	MET	POLE4	EVA1C	PNKP	IPP
AMOTL1	STRIP2	SINHCAF	UFSP2	AC093323.1	SYNE2
HIPK3	LDB1	PSMC3IP	GTPBP2	KHDC4	UBR2
NPR3	AREL1	POLR2K	FBXO9	ZNF48	CYB5R4
HS6ST1	TANGO2	ZNF140	C21orf58	PFKM	VPS39
PRKX	FLCN	CCDC85B	BMPER	MRPS21	RNASEL
SMURF1	ROR1	FDX1	SLC38A10	SIRT3	FBXL7
ISPD	OXSR1	TMEM18	STIL	NFU1	ZBTB37
PDE4D	APBB3	ZMYND19	PIGK	GMDS	ARHGEF12
NANOS1	DIAPH1	COMMD5	TXNIP	HSPE1	RAB6B
MAP3K21	E2F8	THBS2	VPS35L	CCDC157	NUMA1
LUZP1	EIF5B	CRISPLD2	NNMT	GNPTG	EYA4
TLNRD1	PRMT9	CDV3	MLPH	TMEM156	STAT5B
ADM2	SRPK2	BLOC1S4	WDR35	POLA2	ABCA5
FAM102A	M6PR	EIF6	STS	NAPRT	FASTKD1
CSNK1E	ZNF569	ZNF274	CD47	MRPS34	ADGRA3
HOXA10	MSN	RAE1	CASC4	RUVBL2	INPP4A
KLHL15	WSB2	FBXL12	TMEM107	LMAN2L	CCDC7
RAB1A		ZNF286B	KCND1	SWI5	STX17
KBTBD6		POLD4	ERLEC1	NCF2	MOCS1
NKX2-4		MAGEH1	GPR176	CCDC24	SMIM8
RAP1GAP		RPS20	C19orf71	GALNT6	FAM155A
ABCB9		PRDM11	JHY	PRAF2	KCTD7
PPP2CB		GLIS2	TUBGCP6	FAM104B	SPTBN1
CKB		SMIM4	ABTB1	LOXL3	MRPL19
WWP1		GTF2B	SKA1	PCCA	PGRMC2
TCF7		LRRC37A3	ABR	HSPB1	ZNF225
ANKRD13B		SLC7A5	MED25	CENPT	MGAT4A
EFHD1		RPS12	NIPSNAP1	STMP1	UROS
TGFBRAP1		F12	CDH2	C14orf93	FAM120C
FUT4		SAP18	LRTOMT	DNAL4	MAN2B2
AHNAK2		PSMA6	COL18A1	BIN3	ZNF169
RRN3		TIMM8A	NRBP2	TPM4	NEDD1
ZNF219		EIF3M	ZNF517	TMEM132A	ZSCAN26
PODXL		MRPS24	PIGB	INSIG1	KMT2E
C11orf45		FAM53B	TMEM237	SFXN5	KCTD21
ZNF792		PNO1	MXD4	ATP5F1A	DARS2
URB1		GPR158	FAM83D	VAC14	TOX
BCOR		RPS19	SKIV2L	BAD	ZNF575
MYB		MLF2	PAX6	CABLES1	AP2B1
BRD2		E2F3	ARHGEF1	SDF2L1	KANSL1L
ARHGEF3		NDUFA11	ALDH16A1	NUP35	LPIN2
FERMT3		TMEM258	SEMA6B	C16orf74	SAMD9L
FAT1		RAP1B	EXTL2	RPA3	ZNF605
GARS		MSL2	CSAD	SHARPIN	KDELC2
MCIDAS		CARS	SYTL3	SHMT1	HEATR5B
ZNF561		ZFAND5	ANPEP	GMPPA	NINL
SOX18		ATP6V0B	SOX12	FBLIM1	TUBGCP5
ZNF202		PHF5A	ELP4	PIH1D1	KLHL5
PHYHIP		TP53I13	PITPNM3	NDUFB3	KATNAL1
POLR3D		EIF1AX	CYTH2	ESCO2	MINDY1
SHROOM2		H3F3B	SPOCK3	ZBTB22	GYS1
BCL2		NBL1	QARS	IL4I1	USP27X
NRIP3		MAGEA6	GRIPAP1	UBAC2	PTCD3
ZNF441		PPTC7	TPM1	FASTK	POSTN
USP36		RBM15B	CAB39L	C4orf48	TRIM37
RELL1		PQLC1	CCDC61	KIRREL3	ZNF443
ZNF551		BTF3	SLC38A6	TMCO3	TTC13
JARID2		NEK8	TESMIN	MRPL43	DYM
FLT1		KREMEN2	PPM1B	KATNB1	PGM2L1
ISCU		SEC14L2	KYAT3	ISCA2	ATP6V0A1
MTSS1		FOSL1	GATB	VASH1	TNS3
PRKAB2		NUDT8	ZNF512	C1GALT1C1	EEF1AKMT2
ZC3H12C		CDC42SE1	ATF6B	RFXANK	ZNF397
TRMT61A		RRP1	PNISR	PARP8	CUL7
CCIN		LRP5L	CKAP2L	PPM1F	ICE2
POMZP3		IFI6	EEFSEC	PGP	SLC35A5
ZBTB34		SIAH2	ARNT2	ID3	ENTPD5
CDCP1		TOR1A	C5orf24	FDPS	ARHGEF28
USP31		ROMO1	TCEAL1	WASHC3	WDTC1
B3GNT2		AGAP3	RHNO1	DIMT1	CPSF2
TES		SELENOK	MYO7B	SIX4	PPP1R21
HIST1H2BK		CD70	TUBA1A	CBX3	CLOCK
BAZ1A		EMC8	FBXO5	SAMD10	PEX19
USP15		CALM1	PPP2R5C	HHIPL2	PSKH1
ZSCAN25		SDHAF2	GEMIN8	TRMT61B	ATP2C1
OSBPL3		IMP4	ZNF519	C4orf3	LTB4R2
AMOTL2		THAP1	COQ7	TMEM25	COL4A4
BMPR1B		CITED4	GPR173	CD99L2	ATP11C
OGFOD1		NOB1	ABCD4	SFXN3	USP49
DENND6B		DNTTIP2	GPALPP1	RFC4	HOXC10
SERPINE2		NOP56	SKA2	MPLKIP	STYX
TGDS		C2orf76	MSRB3	STARD4	SCYL3
ITPKA		PJA1	MRPS27	TUBB	SEPHS1
RIOK1		C1orf122	MEX3A	MRPL28	ZNF253
PIK3R3		TPRN	ITGAV	MPG	ZBED3
LAMB3		CCDC137	NID2	GMPR2	CCDC126
N4BP2		SQSTM1	WDR62	CUTC	TRIM5
SERPINB7		RPLP1	LMF1	RNLS	CA5B
MIER2		ALDH1B1	RNF145	CUEDC2	MAP4
FOXN2		PDF	PDSS2	CHEK2	CCAR1
NT5C3A		MZT2A	COA5	PPIH	GOLPH3L
FUT1		ATF1	RNF123	FOXG1	RCOR3
TRIM55		RIN2	PLIN3	SSU72	PROSER3
ZPR1		TUFT1	MAGED1	ARL2	DMAP1
ZNF563		LTBP2	NIPSNAP2	SLC35A1	CCDC120
RBM18		CSTF3	SCN5A	PPP1R7	DOCK11
IFIT3		C6orf52	CPPED1	SMPD2	ARFGEF3
BRIX1		FBXL14	ADAM9	DMAC1	CORO2A
INA		TNFRSF21	LTBP1	PRR7	BMPR2
RPS27L		PIM1	SNAP23	CCDC92	KALRN
PCDH10		SRP68	SUN2	SLC25A4	TENT5B
PARP10		MIS12	IDH1	CREB3L4	NFIX
LRRC8B		PCGF6	TMEM44	C15orf40	BCR
RALA		YKT6	ME3	CCDC167	C11orf80
OLFM2		DCUN1D5	CBY1	CACNA1G	PABPC4L
SARS		JADE2	KIF22	ASF1B	VPS53
NHSL1		CYLD	LAYN	FAHD2A	PEX1
SLC9A3R1		PIM2	STK11IP	MRPL24	FDXACB1
EPHA4		RABGEF1	REPIN1	KDELR3	RFX1
SLC1A4		CHMP4B	RARG	GSTM4	MAN1A2
RPS17		NAV3	ANP32A	CENPN	ZNF182
CMIP		MICALL2	XRCC2	ZNF653	ARMC2
IKZF2		TBCA	PAN2	POLR2J	FER
DIABLO		NOL3	ACADS	UROD	CLK4
BCL7A		HSPH1	SNX14	COMMD3	CC2D1B
FBXO45		FSTL3	TPD52	RTN2	HEATR5A
CDT1		RNF168	BABAM2	AKTIP	SIM2
CD55		NKRF	TFB1M	ICAM5	JMJD8
TLCD1		METAP2	POC1A	DTX3	ZNF559
TEX15		ZNF394	POLG2	ACAT1	SLX4IP
TAB3		ADORA1	NFE2L3	MYPOP	AP3M1
CEL		AP1S1	SKA3	DCXR	PCDHB13
LONRF1		RCE1	SPPL2B	EFEMP2	GPX8
RELT		UBE2J2	SAPCD2	HDGF	VMP1
SLC46A1		VDAC2	CHURC1	CHCHD6	TSPYL4
HIVEP3		OBSCN	GABRE	FOXRED1	AGTPBP1
MLKL		FADS3	SCD	PFN2	SCMH1
TMEM201		STK10	L3MBTL1	IQCE	CLK2
PINX1		P4HA2	TRPM4	STMN1	PIK3C3
NDN		POLR2A	BIVM	NAGLU	MYO1C
KRBA1		RHBDL2	CFL2	NDUFA1	TNC
EIF2S1		RASSF4	NECTIN2	TMEM9	TMEM79
PFKFB4		POLR3F	PINK1	SUMF1	HOXC9
P3H2		TRIP6	PKP3	ACAT2	IGF2BP2
WNT5A		DTX2	CRTC1	MSRB2	RPS6KC1
ARHGAP22		C4A	RGS9	SREBF2	EIF2AK2
MXD1		HINT1	AFAP1L1	HAUS5	FANCI
RAP1GAP2		GABPB1	PBXIP1	SURF1	EHD2
HSPA9		SLC7A11	TBC1D17	PRDX5	ZNF852
FEM1C		UBE2M	PBK	HIST1H2BD	ARID1B
CSRP1		CDC14A	MKS1	GABARAPL2	ZZEF1
PEAR1		TRIM21	TBC1D22A	ZNF546	ZFPM2
ETS1		NDUFA12	LYPLAL1	SNRPA	FKBPL
DDB2		HSPB1	FO681492.1	ARSA	ARID2
PDLIM1		CEP95	PCMTD2	PMM1	MLH3
HSPA14		LPIN1	CCDC127	CCDC28A	DAG1
SLC16A10		NPPB	MSRB1	RAD21	TMEM50B
GCLM		S100A11	TMBIM4	MIPEP	STAU2
SLC25A45		NIPA2	TBC1D16	B9D2	PRR14L
MBOAT1		GSKIP	LTBP3	SLC25A1	ODF2L
ALS2CL		ELK3	2022-03-09	ACSS2	TAF9B
C1orf198		FBXO31	TCTN1	VPS29	SPIDR
ENTPD7		C5orf30	PQLC3	TANK	SEL1L
TP53I11		HSPA12A	CDK1	HEMK1	NIPAL3
EDEM1		RHOG	LEPROT	KAT8	ELMOD3
PLEC		SYPL1	ORC3	UQCRC2	TSSK4
SASH1		GFER	UBE2D4	TWIST2	INTS8
GPR4		UTP14A	FLOT2	ARL16	MPP2
MAMDC4		GNB2	BMT2	H2AFZ	RBBP9
TXNRD1		ZNF850	GNG7	SMDT1	CLSTN1
MREG		LY6E	SLC44A2	IFI35	VRK3
SLC25A30		DCTPP1	MORN4	CCDC25	IGF2R
IL4R		AAR2	BCAT1	NDUFV1	ZNF106
ACVR1C		MAGOH	STK33	LSM10	DEPDC5
CASZ1		EIF4A3	BCAM	DPAGT1	PAPPA2
MOB3B		PPAN	SPATC1L	MOGS	NHLRC2
PSAT1		RPL8	AP2A1	TCF25	AP3B1
TSPYL2		FXYD5	CRYZ	TMEM205	H2AFV
MTO1		NUAK1	PPP2R3B	CFDP1	TMCO6
DHX33		MYDGF	SHC2	EIF2B4	UBAP2L
ATP1B3		GAR1	MPI	CCDC57	TMEM260
NPTX1		PLEKHO2	PPP3CB	MAGI2	LMBR1L
ORAI1		ZBTB8A	FBXW9	ARMCX1	APPL2
TRAF3IP2		STK32C	ENOX2	NUP37	ZNF439
AGO2		COPRS	ABCB8	PRKAG1	WIPF1
DDX3Y		UBB	MELK	SERINC2	HOOK3
ARHGAP27		GNA11	ATP5S	CYB5D2	DNAJC30
SKI		TINAGL1	PXK	BRI3	AFDN
DTL		TSPO	VPS16	P3H3	LRCH3
RETSAT		SLC52A2	XRCC4	PCID2	FAM120B
UTP4		C16orf91	HLA-F	DUS2	SLC9A6
TMEM173		CDC6	SMYD3	DUT	HNRNPUL2
ATP2A2		LEMD3	MEST	SPATA24	DFFB
SLC35D1		POLR2L	OPN1SW	ATG7	RABL3
ABLIM1		RPF1	AHCYL1	MECR	ITFG2
IL1RAP		LGALS3	ASB13	SOD2	AP5S1
SGTB		ZNF550	LIMS2	TMEM123	SCAMP1
RAB11FIP2		RPL30	GTF2IRD2B	PSMD10	SLC11A2
DAB2IP		CARD19	DNAJC10	AJUBA	NUCB2
TRIM3		C1orf109	C9orf116	TRIM41	ZKSCAN7
SHANK3		AMMECR1L	SPDL1	NR1D2	COL4A5
TERF2IP		TAF7	ERLIN2	MAF1	MECOM
P2RX5		HMGCS1	RAD51B	ATP5PO	NCOA2
FAM91A1		PRRX2	DLG4	ADGRB2	ZNF93
PKIA		ZBTB2	XYLT1	FADS2	PPP1R13L
TUT7		NGDN	CFH	ENSA	STAT6
TSHZ3		CAVIN4	CETN3	ZCCHC18	OTUD7B
KIF26A		TMEM87A	JAM2	FARS2	ZNF606
PPM1A		PPIB	SSC5D	P2RX4	ZBTB40
TBC1D2B		UTP23	CRADD	MYL12A	TBC1D19
SPTY2D1		ACYP1	PAAF1	YBEY	SMARCD3
ANKRD1		RRP15	BTBD2	C3	DIS3L2
SNRK		NOLC1		APEH	ZNF391
ARID3B		GLRX3		ARGLU1	SLC7A2
MRPL49		NDUFAF5		PTGR1	SEZ6L2
POLR1E		IDI1		TMEM69	UVSSA
ARID3A		MTF1		MFSD1	ATP9B
WDR47		RFLNA		COMMD9	POU2F1
JPH1		LUC7L2		SARAF	ELP1
IFRD1		MAX		CYB5A	NUP133
RASSF8		RPRD1B		LSM4	TRMT10B
DCUN1D3		PRELID1		EVL	DPY19L4
DYNLL2		ZNF706		COPZ1	DSTYK
TMPPE		GREM1		DBNDD1	SEC22C
SPRYD7		POLR3K		SAMD14	NHSL2
SLC12A2		MGLL		ROBO3	BHLHB9
SGMS1		TMEM51		RPAIN	NDUFAF7
IGFBP4		FAM228B		WASF1	GOLGA1
USP2		NAA20		HNRNPH2	VIPAS39
STX3		RAB35		CHMP2A	GOPC
NOM1		PPAT		CD151	TTC14
ESS2		RAB5IF		NDUFB6	ZFYVE9
BTN2A1		ASB1		AP1G2	ITFG1
FAM83G		HCCS		ACTR3B	GGA3
GPRIN1		SNX18		SVIP	ZNF680
WHAMM		MPHOSPH10		CYP2U1	PBRM1
CASP10		RPL31		NPM3	CDKAL1
SKIDA1		PTRH2		ARL6IP6	SCFD2
SERTAD4		RAN		TMEM120A	FAM122C
SCRIB		TIMM13		ZNF580	NHS
RAG1		USP1		PARK7	ANAPC1
CHD7		CCDC9		UBA3	KIAA0513
ADAMTS7		EIF5		LIN9	MTMR10
SUCO		NUDT19		FGFR1OP	ENAH
PRRG1		FRS3		SCARA3	DPP8
DGKH		GSDME		NDUFB10	DENND4C
EXO5		MTHFD2L		CXCL6	ASXL1
AC010616.1		POLR2I		DHFR	ASH1L
SPRED2		ZNRD1		SCAND1	GOLGA6L9
TGFBR1		ZBTB46		CRELD1	ORC2
GOLIM4		NADSYN1		C4orf46	SUFU
TRIM32		NDUFAF2		FOXD4	KIAA1143
GNAI1		RRP7A		HIST1H2BJ	UFL1
ZSWIM6		RPS3		TMEM147	ZNF429
RBMS1		KCNS3		HOXA3	ZNF81
CXCL16		ATP6V1G1		COMMD8	ZNF132
PPP2R2A		UBL4A		TIMM13	PLEKHA2
TBC1D2		TAF4B		SS18L2	SLC4A4
KIF26B		APOBEC3F		PRSS23	LMO7
TMEM185B		MAD2L1BP		LIN52	ZNF682
ZNF761		PYURF		U2AF1L4	BRD3
IVNS1ABP		LSM6		KLHDC2	PPWD1
WDR66		MEX3D		CWF19L1	MME
AADAT		FSD1L		CDKN2AIPNL	CAD
GLTP		RPL36A		THAP2	DENND3
DAGLA		TICAM1		PGS1	ZNF417
SRC		KIAA1614		THY1	SCAPER
OTULINL		SNRPE		HPS1	AKNA
ABHD15		ALDH9A1		MAFK	PRRT3
LIMK2		GNL2		PLD2	CC2D1A
HELZ2		SFT2D1		SH3GLB2	ZNF691
SLC4A11		SNX11		UBE3D	SEC24D
YWHAG		CYC1		SPSB2	STAG1
CARD10		H2AFJ		TRIB2	EIF2AK1
UGDH		RNF139		MCOLN1	BCORL1
PGAP1		RNF44		ZNF579	KDM8
SERTAD2		PARD6B		SYMPK	MADD
AKAP12		NOD1		ECI1	ZBTB26
CSNK1A1		LIMS1		MRPL48	CDAN1
RUNX3		TXN		ANAPC16	NOMO1
RDH10		ZBTB21		CUL4A	DCAF10
ALKBH8		C4orf48		SRSF3	ZDHHC21
PLEKHA3				NMRAL1	PARS2
UTP25				RRNAD1	ZNF493
SCHIP1				ZNF8	RNPC3
PYGO1				POMT1	REEP3
CDIP1				HR	COL4A3BP
KDM6A				RGL2	GRIN2D
TRMT6				ILVBL	DDR2
LITAF				TSFM	CEP250
ENOPH1				KRT10	USP21
GSR				B3GAT3	RIMKLB
GIT1				BCKDK	DCTN1
SEC61A1				AMY2B	NSD2
MEF2A				MTX1	USP33
GAD1				SSNA1	FAM184A
NLE1				HMCES	DBT
DNAJC5				ATAT1	ZNF280D
PDZD4				LAPTM4A	FBLN2
GJA1				STUB1	CROCC
PGBD2				TGFBI	PIP5K1C
PLEKHF2				WRAP53	EFCAB14
ERO1B				ATP5MC2	GLMP
NETO2				CFAP36	TUBG2
OTUD4				TIMM17B	C17orf97
DUSP2				ARMC6	ADAL
IRS1				NBDY	CDC42BPA
CCDC8				FBXO48	EGLN1
NIPAL1				GSDMD	KCTD20
C18orf25				TADA3	PRRX1
LCAT				RANGAP1	ARHGAP17
BRF2				CDK7	SLC43A1
SH2D5				POLR3E	APPBP2
PHLDB3				DYRK4	PUDP
ANKRD11				PTPRN	ERMARD
POM121C				RFNG	KLHDC10
CCNB1IP1				GAA	PEX2
ITGA6				NAGPA	PLA2G12A
EI24				IFT20	ABHD10
CAV2				SUPT3H	NLGN2
CLDN1				SLC22A3	NEK9
GPATCH4				SNF8	GALNT13
ISG20L2				UNC50	GBA
ATP1A1				C20orf27	PRR3
CD276				TPRA1	TRIQK
ZBTB11				DRAP1	TK2
TKT				ECH1	LLGL2
TSSK6				MMP2	DOCK7
PLCXD1				PSEN2	COG8
CNST				FIS1	ZKSCAN8
STMN3				SLC45A3	RASA1
DEDD2				NFKBIL1	POLA1
MICB				IFT52	RAB36
[truncated: 129 more rows]

## Sheet: S7
Supplementary Table S7. Enriched functional annnotation terms associated with significantly up-regulated genes both in WT 12h vs WT 0h and KO 12h vs KO 0h.
[truncated: 1,238 more rows]

[truncated: 7 more sheets: S8, S9, S10, S11, S12, S13, S14]
